# Supplementary material for: Regulatory T cells function in established systemic inflammation and reverse fatal autoimmunity
Source: Springer Nature journal article supplement (doi:10.1038/s41590-021-01001-4), 2021-08-23
Supplement: 41590_2021_1001_MOESM1_ESM.pdf [file 41590_2021_1001_MOESM1_ESM.pdf]

**Supplementary information**

---

**Regulatory T cells function in established systemic inflammation and reverse fatal autoimmunity**

---

In the format provided by the authors and unedited

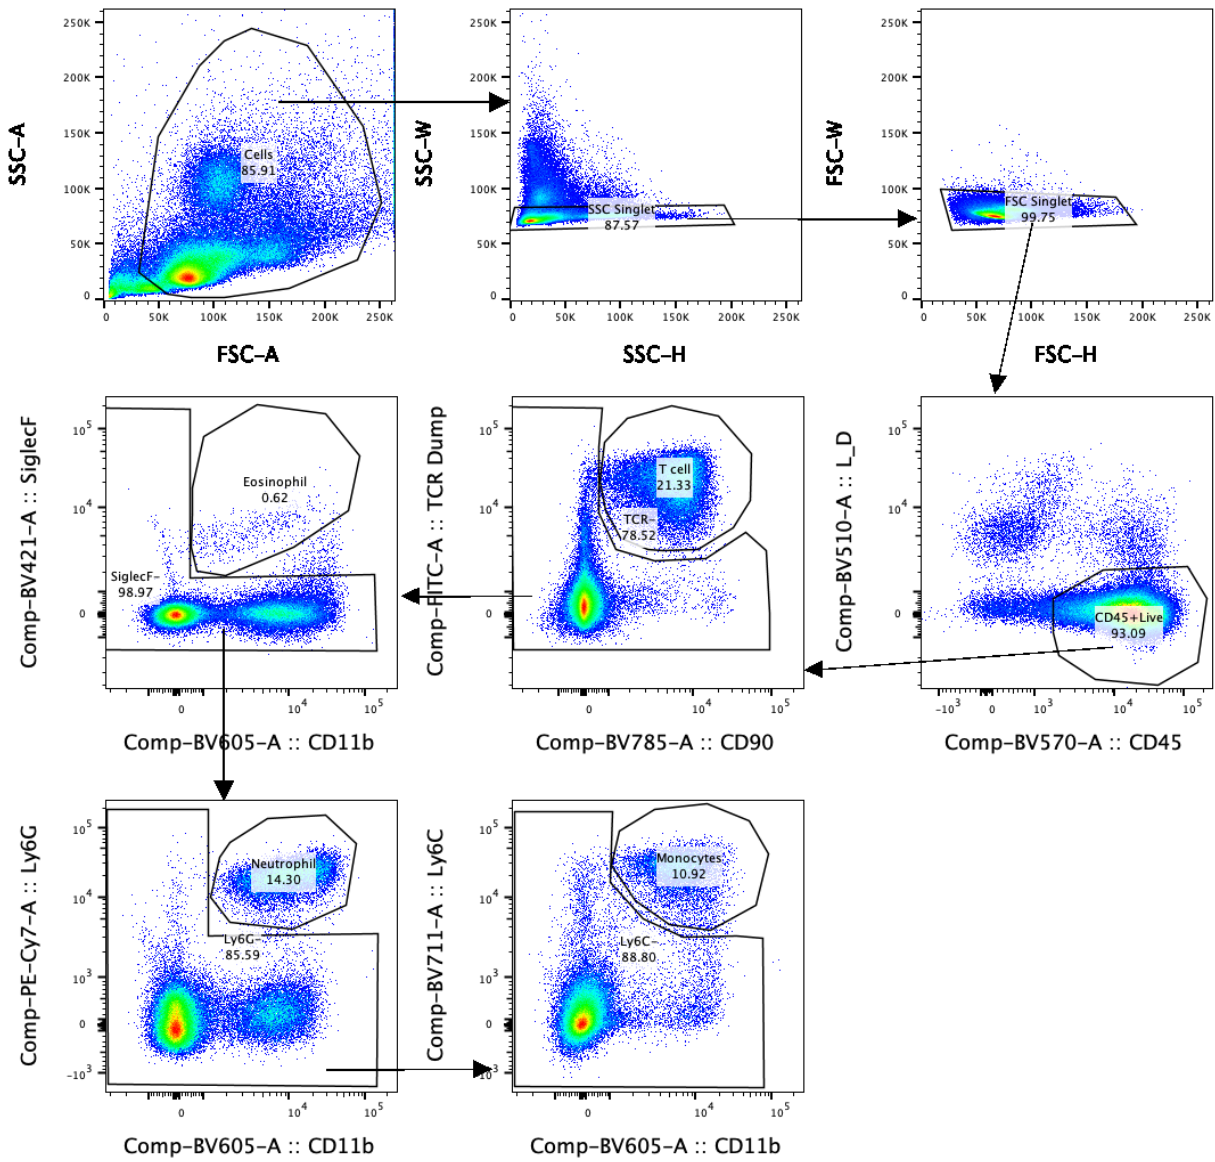

**Supplementary Figure 1 | Gating strategies for myeloid cell populations.**
