# Supplementary material for: Regulatory T cells function in established systemic inflammation and reverse fatal autoimmunity
Source: Springer Nature journal article supplement (doi:10.1038/s41590-021-01001-4), 2021-08-23
Supplement: 41590_2021_1001_MOESM4_ESM.pdf [file 41590_2021_1001_MOESM4_ESM.pdf]

| Figure | Panel   | Sample size                                                                                                                                                                                                                                                                                                                                                                                                                                                                                         |
|--------|---------|-----------------------------------------------------------------------------------------------------------------------------------------------------------------------------------------------------------------------------------------------------------------------------------------------------------------------------------------------------------------------------------------------------------------------------------------------------------------------------------------------------|
| Fig. 1 | Fig. 1d | Week 0, $Foxp3^{LSL/y}Cd4^{wt}$ , n=6; $Foxp3^{DTR-GFP/y}Cd4^{creERT2}$ , n=7;<br>$Foxp3^{LSL/y}Cd4^{creERT2}$ , n=7.<br>Week 1, $Foxp3^{LSL/y}Cd4^{wt}$ , n=6; $Foxp3^{DTR-GFP/y}Cd4^{creERT2}$ , n=8;<br>$Foxp3^{LSL/y}Cd4^{creERT2}$ , n=8.<br>Week 2, $Foxp3^{LSL/y}Cd4^{wt}$ , n=6; $Foxp3^{DTR-GFP/y}Cd4^{creERT2}$ , n=12;<br>$Foxp3^{LSL/y}Cd4^{creERT2}$ , n=8.<br>Week 4, $Foxp3^{LSL/y}Cd4^{wt}$ , n=6; $Foxp3^{DTR-GFP/y}Cd4^{creERT2}$ , n=3;<br>$Foxp3^{LSL/y}Cd4^{creERT2}$ , n=5.   |
|        | Fig. 1e | Week 0, $Foxp3^{LSL/y}Cd4^{wt}$ , n=6; $Foxp3^{DTR-GFP/y}Cd4^{creERT2}$ , n=5;<br>$Foxp3^{LSL/y}Cd4^{creERT2}$ , n=5.<br>Week 1, $Foxp3^{LSL/y}Cd4^{wt}$ , n=6; $Foxp3^{DTR-GFP/y}Cd4^{creERT2}$ , n=8;<br>$Foxp3^{LSL/y}Cd4^{creERT2}$ , n=8.<br>Week 2, $Foxp3^{LSL/y}Cd4^{wt}$ , n=5; $Foxp3^{DTR-GFP/y}Cd4^{creERT2}$ , n=11;<br>$Foxp3^{LSL/y}Cd4^{creERT2}$ , n=8.<br>Week 4, $Foxp3^{LSL/y}Cd4^{wt}$ , n=6; $Foxp3^{DTR-GFP/y}Cd4^{creERT2}$ , n=6;<br>$Foxp3^{LSL/y}Cd4^{creERT2}$ , n=7.   |
|        | Fig. 1f | Week 0, $Foxp3^{LSL/y}Cd4^{wt}$ , n=8; $Foxp3^{DTR-GFP/y}Cd4^{creERT2}$ , n=4;<br>$Foxp3^{LSL/y}Cd4^{creERT2}$ , n=6.<br>Week 1, $Foxp3^{LSL/y}Cd4^{wt}$ , n=7; $Foxp3^{DTR-GFP/y}Cd4^{creERT2}$ , n=2;<br>$Foxp3^{LSL/y}Cd4^{creERT2}$ , n=3.<br>Week 2, $Foxp3^{LSL/y}Cd4^{wt}$ , n=4; $Foxp3^{DTR-GFP/y}Cd4^{creERT2}$ , n=6;<br>$Foxp3^{LSL/y}Cd4^{creERT2}$ , n=8.<br>Week 4, $Foxp3^{LSL/y}Cd4^{wt}$ , n=6; $Foxp3^{DTR-GFP/y}Cd4^{creERT2}$ , n=6;<br>$Foxp3^{LSL/y}Cd4^{creERT2}$ , n=7.    |
|        | Fig. 1g | $Foxp3^{LSL/y}Cd4^{wt}$ , n=7; $Foxp3^{DTR-GFP/y}Cd4^{creERT2}$ , n=6; $Foxp3^{LSL/y}Cd4^{creERT2}$ , n=7.                                                                                                                                                                                                                                                                                                                                                                                          |
|        | Fig. 1i | $Foxp3^{LSL/y}Cd4^{wt}$ , n=4; $Foxp3^{DTR-GFP/y}Cd4^{creERT2}$ , n=2; $Foxp3^{LSL/y}Cd4^{creERT2}$ , n=4.                                                                                                                                                                                                                                                                                                                                                                                          |
| Fig. 2 | Fig. 2b | Week 0, $Foxp3^{DTR-GFP/LSL}Cd4^{wt}$ , n=6; $Foxp3^{DTR-GFP/WT}Cd4^{creERT2}$ , n=4; $Foxp3^{DTR-GFP/LSL}Cd4^{creERT2}$ , n=3.<br>Week 1, $Foxp3^{DTR-GFP/LSL}Cd4^{wt}$ , n=5; $Foxp3^{DTR-GFP/WT}Cd4^{creERT2}$ , n=4; $Foxp3^{DTR-GFP/LSL}Cd4^{creERT2}$ , n=4.<br>Week 2, $Foxp3^{DTR-GFP/WT}Cd4^{creERT2}$ , n=4; $Foxp3^{DTR-GFP/LSL}Cd4^{creERT2}$ , n=3.<br>Week 5, $Foxp3^{DTR-GFP/LSL}Cd4^{wt}$ , n=5; $Foxp3^{DTR-GFP/WT}Cd4^{creERT2}$ , n=4; $Foxp3^{DTR-GFP/LSL}Cd4^{creERT2}$ , n=5. |
|        | Fig. 2c | Week 1, $Foxp3^{DTR-GFP/LSL}Cd4^{wt}$ , n=4; $Foxp3^{DTR-GFP/WT}Cd4^{creERT2}$ , n=5; $Foxp3^{DTR-GFP/LSL}Cd4^{creERT2}$ , n=4.<br>Week 5, $Foxp3^{DTR-GFP/WT}Cd4^{creERT2}$ , n=5; $Foxp3^{DTR-GFP/LSL}Cd4^{creERT2}$ , n=5.                                                                                                                                                                                                                                                                       |
|        | Fig. 2d | Week 0, $Foxp3^{DTR-GFP/LSL}Cd4^{wt}$ , n=6; $Foxp3^{DTR-GFP/WT}Cd4^{creERT2}$ , n=4; $Foxp3^{DTR-GFP/LSL}Cd4^{creERT2}$ , n=4.<br>Week 5, $Foxp3^{DTR-GFP/WT}Cd4^{creERT2}$ , n=5; $Foxp3^{DTR-GFP/LSL}Cd4^{creERT2}$ , n=5.                                                                                                                                                                                                                                                                       |
|        | Fig. 2e | Week 0, $Foxp3^{DTR-GFP/LSL}Cd4^{wt}$ , n=6; $Foxp3^{DTR-GFP/WT}Cd4^{creERT2}$ , n=4; $Foxp3^{DTR-GFP/LSL}Cd4^{creERT2}$ , n=4.<br>Week 5, $Foxp3^{DTR-GFP/WT}Cd4^{creERT2}$ , n=5; $Foxp3^{DTR-GFP/LSL}Cd4^{creERT2}$ , n=5.                                                                                                                                                                                                                                                                       |
| Fig. 3 | Fig. 3a | Week 1, $Foxp3^{DTR-GFP/y}Cd4^{creERT2}$ , n=8; $Foxp3^{LSL/y}Cd4^{creERT2}$ , n=6.<br>Week 2, $Foxp3^{DTR-GFP/y}Cd4^{creERT2}$ , n=11; $Foxp3^{LSL/y}Cd4^{creERT2}$ , n=8.<br>Week 4, $Foxp3^{DTR-GFP/y}Cd4^{creERT2}$ , n=3; $Foxp3^{LSL/y}Cd4^{creERT2}$ , n=5.                                                                                                                                                                                                                                  |

|                      |                       |                                                                                                                                                                                                                                                                                                                                                                                                                                                                                                                                                                                                                                                                                                                                                                                                                                                                                       |
|----------------------|-----------------------|---------------------------------------------------------------------------------------------------------------------------------------------------------------------------------------------------------------------------------------------------------------------------------------------------------------------------------------------------------------------------------------------------------------------------------------------------------------------------------------------------------------------------------------------------------------------------------------------------------------------------------------------------------------------------------------------------------------------------------------------------------------------------------------------------------------------------------------------------------------------------------------|
|                      | Fig. 3f               | <i>Foxp3</i> <sup>LSL/WT</sup> <i>Cd4</i> <sup>creERT2</sup> GFP+, n=3; <i>Foxp3</i> <sup>LSL/WT</sup> <i>Cd4</i> <sup>creERT2</sup> GFP-, n=3;<br><i>Foxp3</i> <sup>DTR/WT</sup> <i>Cd4</i> <sup>creERT2</sup> GFP+, n=3; <i>Foxp3</i> <sup>DTR/WT</sup> <i>Cd4</i> <sup>creERT2</sup> GFP-, n=3.                                                                                                                                                                                                                                                                                                                                                                                                                                                                                                                                                                                    |
|                      | Fig. 3h               | Week 1, <i>Foxp3</i> <sup>DTR/WT</sup> <i>Cd4</i> <sup>creERT2</sup> , n=5; <i>Foxp3</i> <sup>DTR/LSL</sup> <i>Cd4</i> <sup>creERT2</sup> , n=4.<br>Week 2, <i>Foxp3</i> <sup>DTR/WT</sup> <i>Cd4</i> <sup>creERT2</sup> , n=3; <i>Foxp3</i> <sup>DTR/LSL</sup> <i>Cd4</i> <sup>creERT2</sup> , n=4.<br>Week 5, <i>Foxp3</i> <sup>DTR/WT</sup> <i>Cd4</i> <sup>creERT2</sup> , n=8; <i>Foxp3</i> <sup>DTR/LSL</sup> <i>Cd4</i> <sup>creERT2</sup> , n=9.                                                                                                                                                                                                                                                                                                                                                                                                                              |
|                      | Fig. 3j               | <i>Foxp3</i> <sup>DTR/WT</sup> <i>Cd4</i> <sup>creERT2</sup> , n=5; <i>Foxp3</i> <sup>DTR/LSL</sup> <i>Cd4</i> <sup>creERT2</sup> , n=4.                                                                                                                                                                                                                                                                                                                                                                                                                                                                                                                                                                                                                                                                                                                                              |
| Fig. 4               | Fig. 4b               | <i>Foxp3</i> <sup>DTR/y</sup> <i>Cd4</i> <sup>creER/+</sup> , n=5; <i>Foxp3</i> <sup>LSL/y</sup> <i>Cd4</i> <sup>creER/+</sup> , n=5.                                                                                                                                                                                                                                                                                                                                                                                                                                                                                                                                                                                                                                                                                                                                                 |
|                      | Fig. 4c               | Treg percentage, <i>Foxp3</i> <sup>DTR/y</sup> <i>Cd4</i> <sup>creER/+</sup> , n=9; <i>Foxp3</i> <sup>LSL/y</sup> <i>Cd4</i> <sup>creER/+</sup> , n=7.<br>Treg cell number, <i>Foxp3</i> <sup>DTR/y</sup> <i>Cd4</i> <sup>creER/+</sup> , n=5; <i>Foxp3</i> <sup>LSL/y</sup> <i>Cd4</i> <sup>creER/+</sup> , n=5.                                                                                                                                                                                                                                                                                                                                                                                                                                                                                                                                                                     |
|                      | Fig. 4d               | <i>Foxp3</i> <sup>DTR/y</sup> <i>Cd4</i> <sup>creER</sup> Tconv, n=6; <i>Foxp3</i> <sup>LSL/y</sup> <i>Cd4</i> <sup>creER</sup> Tconv, n=7;<br><i>Foxp3</i> <sup>DTR/y</sup> <i>Cd4</i> <sup>creER</sup> Treg, n=4; <i>Foxp3</i> <sup>LSL/y</sup> <i>Cd4</i> <sup>creERT2</sup> Treg, n=7;<br><i>Foxp3</i> <sup>LSL/y</sup> <i>Cd4</i> <sup>creER</sup> Wannabe, n=7.                                                                                                                                                                                                                                                                                                                                                                                                                                                                                                                 |
|                      | Fig. 4f               | <i>Foxp3</i> <sup>DTR/y</sup> <i>Cd4</i> <sup>creER</sup> , n=9; <i>Foxp3</i> <sup>LSL/y</sup> <i>Cd4</i> <sup>creER</sup> Tconv, n=7.                                                                                                                                                                                                                                                                                                                                                                                                                                                                                                                                                                                                                                                                                                                                                |
|                      | Fig. 4g               | <i>Foxp3</i> <sup>DTR/y</sup> <i>Cd4</i> <sup>creER</sup> , n=9; <i>Foxp3</i> <sup>LSL/y</sup> <i>Cd4</i> <sup>creER</sup> Tconv, n=7.                                                                                                                                                                                                                                                                                                                                                                                                                                                                                                                                                                                                                                                                                                                                                |
|                      | Fig. 4h               | <i>Foxp3</i> <sup>DTR/y</sup> <i>Cd4</i> <sup>creER</sup> , n=5; <i>Foxp3</i> <sup>LSL/y</sup> <i>Cd4</i> <sup>creER</sup> Tconv, n=5.                                                                                                                                                                                                                                                                                                                                                                                                                                                                                                                                                                                                                                                                                                                                                |
| Fig. 5               | Fig. 5c               | 7 Days, <i>Foxp3</i> <sup>DTR/y</sup> <i>Cd4</i> <sup>creER</sup> , n=9; <i>Foxp3</i> <sup>LSL/y</sup> <i>Cd4</i> <sup>creER</sup> Tconv, n=9.<br>1 Mon, <i>Foxp3</i> <sup>DTR/y</sup> <i>Cd4</i> <sup>creER</sup> , n=4; <i>Foxp3</i> <sup>LSL/y</sup> <i>Cd4</i> <sup>creER</sup> Tconv, n=9.<br>4 Mon, <i>Foxp3</i> <sup>DTR/y</sup> <i>Cd4</i> <sup>creER</sup> , n=4; <i>Foxp3</i> <sup>LSL/y</sup> <i>Cd4</i> <sup>creER</sup> Tconv, n=5.<br>7 Mon, <i>Foxp3</i> <sup>DTR/y</sup> <i>Cd4</i> <sup>creER</sup> , n=4; <i>Foxp3</i> <sup>LSL/y</sup> <i>Cd4</i> <sup>creER</sup> Tconv, n=5.                                                                                                                                                                                                                                                                                     |
|                      | Fig. 5j               | <i>Foxp3</i> <sup>LSL/y</sup> , 3390 cells; <i>Foxp3</i> <sup>DTR/y</sup> tdTomato <sup>+</sup> , 2910 cells; <i>Foxp3</i> <sup>DTR/y</sup> tdTomato <sup>+</sup> , 724 cells.                                                                                                                                                                                                                                                                                                                                                                                                                                                                                                                                                                                                                                                                                                        |
| Fig. 6               | Fig. 6f               | <i>Foxp3</i> <sup>DTR/y</sup> <i>ROSA</i> <sup>Tom</sup> <i>Cd4</i> <sup>creERT2</sup> , n=5; <i>Foxp3</i> <sup>LSL/y</sup> <i>ROSA</i> <sup>Tom</sup> <i>Cd4</i> <sup>creERT2</sup> , n=2.                                                                                                                                                                                                                                                                                                                                                                                                                                                                                                                                                                                                                                                                                           |
|                      | Fig. 6g               | $\gamma$ REG <sup>+</sup> Treg percentage, n=5.<br>$\gamma$ REG <sup>+</sup> Treg cell number, n=5.                                                                                                                                                                                                                                                                                                                                                                                                                                                                                                                                                                                                                                                                                                                                                                                   |
|                      | Fig. 6h               | <i>Foxp3</i> <sup>DTR-GFP</sup> <i>Cd4</i> <sup>creERT2</sup> <i>R26</i> <sup>Tom</sup> , adult, n=5; perinatal, n=5.<br><i>Foxp3</i> <sup>creERT2</sup> <i>R26</i> <sup>Tom</sup> , adult, n=3; perinatal, n=6.                                                                                                                                                                                                                                                                                                                                                                                                                                                                                                                                                                                                                                                                      |
| Extended Data Fig. 1 | Extended Data Fig. 1f | n=5.                                                                                                                                                                                                                                                                                                                                                                                                                                                                                                                                                                                                                                                                                                                                                                                                                                                                                  |
|                      | Extended Data Fig. 1g | No Treg, n=3; Thy1.1 <sup>+</sup> ( <i>Foxp3</i> <sup>LSL/y</sup> <i>Cd4</i> <sup>creERT2/+</sup> ), n=4; Thy1.1 <sup>+</sup> ( <i>Foxp3</i> <sup>LSL/y</sup> <i>Cd4</i> <sup>+/+</sup> ), n=4; Treg ( <i>Foxp3</i> <sup>GFP</sup> ), n=4.                                                                                                                                                                                                                                                                                                                                                                                                                                                                                                                                                                                                                                            |
| Extended Data Fig. 2 | Extended Data Fig. 2a | n=6.                                                                                                                                                                                                                                                                                                                                                                                                                                                                                                                                                                                                                                                                                                                                                                                                                                                                                  |
|                      | Extended Data Fig. 2d | Week 0, <i>Foxp3</i> <sup>LSL/y</sup> <i>Cd4</i> <sup>wt</sup> , n=6; <i>Foxp3</i> <sup>DTR-GFP/y</sup> <i>Cd4</i> <sup>creERT2</sup> , n=7;<br><i>Foxp3</i> <sup>LSL/y</sup> <i>Cd4</i> <sup>creERT2</sup> , n=7.<br>Week 1, <i>Foxp3</i> <sup>LSL/y</sup> <i>Cd4</i> <sup>wt</sup> , n=6; <i>Foxp3</i> <sup>DTR-GFP/y</sup> <i>Cd4</i> <sup>creERT2</sup> , n=8;<br><i>Foxp3</i> <sup>LSL/y</sup> <i>Cd4</i> <sup>creERT2</sup> , n=8.<br>Week 2, <i>Foxp3</i> <sup>LSL/y</sup> <i>Cd4</i> <sup>wt</sup> , n=6; <i>Foxp3</i> <sup>DTR-GFP/y</sup> <i>Cd4</i> <sup>creERT2</sup> , n=12;<br><i>Foxp3</i> <sup>LSL/y</sup> <i>Cd4</i> <sup>creERT2</sup> , n=8.<br>Week 4, <i>Foxp3</i> <sup>LSL/y</sup> <i>Cd4</i> <sup>wt</sup> , n=6; <i>Foxp3</i> <sup>DTR-GFP/y</sup> <i>Cd4</i> <sup>creERT2</sup> , n=3;<br><i>Foxp3</i> <sup>LSL/y</sup> <i>Cd4</i> <sup>creERT2</sup> , n=5. |
|                      | Extended Data Fig. 2e | Week 0, <i>Foxp3</i> <sup>LSL/y</sup> <i>Cd4</i> <sup>wt</sup> , n=6; <i>Foxp3</i> <sup>DTR-GFP/y</sup> <i>Cd4</i> <sup>creERT2</sup> , n=7;<br><i>Foxp3</i> <sup>LSL/y</sup> <i>Cd4</i> <sup>creERT2</sup> , n=7.<br>Week 1, <i>Foxp3</i> <sup>LSL/y</sup> <i>Cd4</i> <sup>wt</sup> , n=6; <i>Foxp3</i> <sup>DTR-GFP/y</sup> <i>Cd4</i> <sup>creERT2</sup> , n=8;<br><i>Foxp3</i> <sup>LSL/y</sup> <i>Cd4</i> <sup>creERT2</sup> , n=8.<br>Week 2, <i>Foxp3</i> <sup>LSL/y</sup> <i>Cd4</i> <sup>wt</sup> , n=6; <i>Foxp3</i> <sup>DTR-GFP/y</sup> <i>Cd4</i> <sup>creERT2</sup> , n=12;<br><i>Foxp3</i> <sup>LSL/y</sup> <i>Cd4</i> <sup>creERT2</sup> , n=8.                                                                                                                                                                                                                       |

|                      |                       |                                                                                                                                                                                                                                                                                                                                                                                                                                                                                                                                                                                                                                                                                                                                                                                                                                                                           |
|----------------------|-----------------------|---------------------------------------------------------------------------------------------------------------------------------------------------------------------------------------------------------------------------------------------------------------------------------------------------------------------------------------------------------------------------------------------------------------------------------------------------------------------------------------------------------------------------------------------------------------------------------------------------------------------------------------------------------------------------------------------------------------------------------------------------------------------------------------------------------------------------------------------------------------------------|
|                      |                       | Week 4, <i>Foxp3</i> <sup>LSL/y</sup> <i>Cd4</i> <sup>wt</sup> , n=6; <i>Foxp3</i> <sup>DTR-GFP/y</sup> <i>Cd4</i> <sup>creERT2</sup> , n=3; <i>Foxp3</i> <sup>LSL/y</sup> <i>Cd4</i> <sup>creERT2</sup> , n=7.                                                                                                                                                                                                                                                                                                                                                                                                                                                                                                                                                                                                                                                           |
|                      | Extended Data Fig. 2f | Week 0, <i>Foxp3</i> <sup>LSL/y</sup> <i>Cd4</i> <sup>wt</sup> , n=6; <i>Foxp3</i> <sup>DTR-GFP/y</sup> <i>Cd4</i> <sup>creERT2</sup> , n=5; <i>Foxp3</i> <sup>LSL/y</sup> <i>Cd4</i> <sup>creERT2</sup> , n=5.<br>Week 1, <i>Foxp3</i> <sup>LSL/y</sup> <i>Cd4</i> <sup>wt</sup> , n=6; <i>Foxp3</i> <sup>DTR-GFP/y</sup> <i>Cd4</i> <sup>creERT2</sup> , n=8; <i>Foxp3</i> <sup>LSL/y</sup> <i>Cd4</i> <sup>creERT2</sup> , n=8.<br>Week 2, <i>Foxp3</i> <sup>LSL/y</sup> <i>Cd4</i> <sup>wt</sup> , n=5; <i>Foxp3</i> <sup>DTR-GFP/y</sup> <i>Cd4</i> <sup>creERT2</sup> , n=11; <i>Foxp3</i> <sup>LSL/y</sup> <i>Cd4</i> <sup>creERT2</sup> , n=8.<br>Week 4, <i>Foxp3</i> <sup>LSL/y</sup> <i>Cd4</i> <sup>wt</sup> , n=6; <i>Foxp3</i> <sup>DTR-GFP/y</sup> <i>Cd4</i> <sup>creERT2</sup> , n=6; <i>Foxp3</i> <sup>LSL/y</sup> <i>Cd4</i> <sup>creERT2</sup> , n=7. |
|                      | Extended Data Fig. 2g | <i>Foxp3</i> <sup>LSL/y</sup> <i>Cd4</i> <sup>wt</sup> , n=7; <i>Foxp3</i> <sup>DTR-GFP/y</sup> <i>Cd4</i> <sup>creERT2</sup> , n=6; <i>Foxp3</i> <sup>LSL/y</sup> <i>Cd4</i> <sup>creERT2</sup> , n=7.                                                                                                                                                                                                                                                                                                                                                                                                                                                                                                                                                                                                                                                                   |
| Extended Data Fig. 3 | Extended Data Fig. 3b | <i>Treg</i> number, <i>Foxp3</i> <sup>DTR-GFP/y</sup> <i>Cd4</i> <sup>creERT2</sup> control, n=8; <i>Foxp3</i> <sup>DTR-GFP/y</sup> <i>Cd4</i> <sup>creERT2</sup> FTY720, n=12; <i>Foxp3</i> <sup>LSL/y</sup> <i>Cd4</i> <sup>creERT2</sup> control, n=9; <i>Foxp3</i> <sup>LSL/y</sup> <i>Cd4</i> <sup>creERT2</sup> FTY720, n=5.<br>tdTomato+ percentage, <i>Foxp3</i> <sup>DTR-GFP/y</sup> <i>Cd4</i> <sup>creERT2</sup> control, n=2; <i>Foxp3</i> <sup>DTR-GFP/y</sup> <i>Cd4</i> <sup>creERT2</sup> FTY720, n=10; <i>Foxp3</i> <sup>LSL/y</sup> <i>Cd4</i> <sup>creERT2</sup> control, n=9; <i>Foxp3</i> <sup>LSL/y</sup> <i>Cd4</i> <sup>creERT2</sup> FTY720, n=5.                                                                                                                                                                                                |
|                      | Extended Data Fig. 3c | <i>Foxp3</i> <sup>LSL/y</sup> <i>Cd4</i> <sup>wt</sup> , n=6; <i>Foxp3</i> <sup>DTR-GFP/y</sup> <i>Cd4</i> <sup>creERT2</sup> , n=12; <i>Foxp3</i> <sup>LSL/y</sup> <i>Cd4</i> <sup>creERT2</sup> , n=5.                                                                                                                                                                                                                                                                                                                                                                                                                                                                                                                                                                                                                                                                  |
|                      | Extended Data Fig. 3d | <i>Foxp3</i> <sup>LSL/y</sup> <i>Cd4</i> <sup>wt</sup> , n=6; <i>Foxp3</i> <sup>DTR-GFP/y</sup> <i>Cd4</i> <sup>creERT2</sup> , n=12; <i>Foxp3</i> <sup>LSL/y</sup> <i>Cd4</i> <sup>creERT2</sup> , n=5.                                                                                                                                                                                                                                                                                                                                                                                                                                                                                                                                                                                                                                                                  |
| Extended Data Fig. 4 | Extended Data Fig. 4d | Week 0, <i>Foxp3</i> <sup>LSL/y</sup> <i>Cd4</i> <sup>wt</sup> , n=8; <i>Foxp3</i> <sup>DTR-GFP/y</sup> <i>Cd4</i> <sup>creERT2</sup> , n=8; <i>Foxp3</i> <sup>LSL/y</sup> <i>Cd4</i> <sup>creERT2</sup> , n=5.<br>Week 4, <i>Foxp3</i> <sup>LSL/y</sup> <i>Cd4</i> <sup>wt</sup> , n=3; <i>Foxp3</i> <sup>DTR-GFP/y</sup> <i>Cd4</i> <sup>creERT2</sup> , n=6; <i>Foxp3</i> <sup>LSL/y</sup> <i>Cd4</i> <sup>creERT2</sup> , n=4.                                                                                                                                                                                                                                                                                                                                                                                                                                        |
|                      | Extended Data Fig. 4e | Week 0, <i>Foxp3</i> <sup>LSL/y</sup> <i>Cd4</i> <sup>wt</sup> , n=11; <i>Foxp3</i> <sup>DTR-GFP/y</sup> <i>Cd4</i> <sup>creERT2</sup> , n=10; <i>Foxp3</i> <sup>LSL/y</sup> <i>Cd4</i> <sup>creERT2</sup> , n=8.<br>Week 4, <i>Foxp3</i> <sup>LSL/y</sup> <i>Cd4</i> <sup>wt</sup> , n=4; <i>Foxp3</i> <sup>DTR-GFP/y</sup> <i>Cd4</i> <sup>creERT2</sup> , n=6; <i>Foxp3</i> <sup>LSL/y</sup> <i>Cd4</i> <sup>creERT2</sup> , n=5.                                                                                                                                                                                                                                                                                                                                                                                                                                      |
| Extended Data Fig. 5 | Extended Data Fig. 5c | Spleen, <i>Foxp3</i> <sup>WT</sup> <i>Treg</i> , n=8; <i>Foxp3</i> <sup>LSL</sup> <i>Treg</i> , n=9; Wannabe, n=9.<br>pLN, <i>Foxp3</i> <sup>WT</sup> <i>Treg</i> , n=8; <i>Foxp3</i> <sup>LSL</sup> <i>Treg</i> , n=9; Wannabe, n=9.<br>mLN, <i>Foxp3</i> <sup>WT</sup> <i>Treg</i> , n=7; <i>Foxp3</i> <sup>LSL</sup> <i>Treg</i> , n=9; Wannabe, n=9.<br>Lung, <i>Foxp3</i> <sup>WT</sup> <i>Treg</i> , n=3; <i>Foxp3</i> <sup>LSL</sup> <i>Treg</i> , n=4; Wannabe, n=9.<br>Liver, <i>Foxp3</i> <sup>WT</sup> <i>Treg</i> , n=3; <i>Foxp3</i> <sup>LSL</sup> <i>Treg</i> , n=4; Wannabe, n=4.<br>Colon LP, <i>Foxp3</i> <sup>WT</sup> <i>Treg</i> , n=3; <i>Foxp3</i> <sup>LSL</sup> <i>Treg</i> , n=4; Wannabe, n=4.                                                                                                                                                 |
| Extended Data Fig. 7 | Extended Data Fig. 7a | <i>Foxp3</i> <sup>DTR-GFP/y</sup> <i>Cd4</i> <sup>creERT2</sup> , n=10; <i>Foxp3</i> <sup>LSL/y</sup> <i>Cd4</i> <sup>creERT2</sup> , n=10.                                                                                                                                                                                                                                                                                                                                                                                                                                                                                                                                                                                                                                                                                                                               |
|                      | Extended Data Fig. 7c | <i>Foxp3</i> <sup>DTR-GFP/y</sup> <i>Cd4</i> <sup>creERT2</sup> , n=2; <i>Foxp3</i> <sup>LSL/y</sup> <i>Cd4</i> <sup>creERT2</sup> , n=2.                                                                                                                                                                                                                                                                                                                                                                                                                                                                                                                                                                                                                                                                                                                                 |
|                      | Extended Data Fig. 7d | <i>Foxp3</i> <sup>DTR-GFP/y</sup> <i>Cd4</i> <sup>creERT2</sup> , n=5; <i>Foxp3</i> <sup>LSL/y</sup> <i>Cd4</i> <sup>creERT2</sup> , n=5.                                                                                                                                                                                                                                                                                                                                                                                                                                                                                                                                                                                                                                                                                                                                 |
|                      | Extended Data Fig. 7e | <i>Foxp3</i> <sup>DTR-GFP/y</sup> <i>Cd4</i> <sup>creERT2</sup> , n=5; <i>Foxp3</i> <sup>LSL/y</sup> <i>Cd4</i> <sup>creERT2</sup> , n=5.                                                                                                                                                                                                                                                                                                                                                                                                                                                                                                                                                                                                                                                                                                                                 |
|                      | Extended Data Fig. 7f | <i>Foxp3</i> <sup>DTR-GFP/y</sup> <i>Cd4</i> <sup>creERT2</sup> , n=5; <i>Foxp3</i> <sup>LSL/y</sup> <i>Cd4</i> <sup>creERT2</sup> , n=5.                                                                                                                                                                                                                                                                                                                                                                                                                                                                                                                                                                                                                                                                                                                                 |

|                       |                        |                                                                                                                                                                                                                                                                                                                                 |
|-----------------------|------------------------|---------------------------------------------------------------------------------------------------------------------------------------------------------------------------------------------------------------------------------------------------------------------------------------------------------------------------------|
| Extended Data Fig. 8  | Extended Data Fig. 8a  | Spleen, pLN, lung, liver, colon LP, <i>Foxp3</i> <sup>DTR-GFP/y</sup> <i>Cd4</i> <sup>creERT2</sup> , n=5; <i>Foxp3</i> <sup>LSL/y</sup> <i>Cd4</i> <sup>creERT2</sup> , n=5.<br>mLN, <i>Foxp3</i> <sup>DTR-GFP/y</sup> <i>Cd4</i> <sup>creERT2</sup> , n=4; <i>Foxp3</i> <sup>LSL/y</sup> <i>Cd4</i> <sup>creERT2</sup> , n=5. |
|                       | Extended Data Fig. 8b  | Spleen, pLN, lung, liver, colon LP, <i>Foxp3</i> <sup>DTR-GFP/y</sup> <i>Cd4</i> <sup>creERT2</sup> , n=5; <i>Foxp3</i> <sup>LSL/y</sup> <i>Cd4</i> <sup>creERT2</sup> , n=5.<br>mLN, <i>Foxp3</i> <sup>DTR-GFP/y</sup> <i>Cd4</i> <sup>creERT2</sup> , n=4; <i>Foxp3</i> <sup>LSL/y</sup> <i>Cd4</i> <sup>creERT2</sup> , n=5. |
|                       | Extended Data Fig. 8c  | Spleen, pLN, lung, liver, colon LP, <i>Foxp3</i> <sup>DTR-GFP/y</sup> <i>Cd4</i> <sup>creERT2</sup> , n=5; <i>Foxp3</i> <sup>LSL/y</sup> <i>Cd4</i> <sup>creERT2</sup> , n=5.<br>mLN, <i>Foxp3</i> <sup>DTR-GFP/y</sup> <i>Cd4</i> <sup>creERT2</sup> , n=4; <i>Foxp3</i> <sup>LSL/y</sup> <i>Cd4</i> <sup>creERT2</sup> , n=5. |
|                       | Extended Data Fig. 8d  | <i>Foxp3</i> <sup>DTR-GFP/y</sup> <i>Cd4</i> <sup>creERT2</sup> , n=5; <i>Foxp3</i> <sup>LSL/y</sup> <i>Cd4</i> <sup>creERT2</sup> , n=5.                                                                                                                                                                                       |
|                       | Extended Data Fig. 8f  | 1.5 mon, n=2; 3 mon, n=4, 5 mon, n=2; 7 mon, n=5.                                                                                                                                                                                                                                                                               |
|                       | Extended Data Fig. 8g  | 1.5 mon, n=2; 3 mon, n=4, 5 mon, n=2; 7 mon, n=5.                                                                                                                                                                                                                                                                               |
| Extended Data Fig. 9  | Extended Data Fig. 9b  | <i>Foxp3</i> <sup>DTR-GFP/y</sup> <i>Cd4</i> <sup>creERT2</sup> , n=5; <i>Foxp3</i> <sup>LSL/y</sup> <i>Cd4</i> <sup>creERT2</sup> , n=5.                                                                                                                                                                                       |
| Extended Data Fig. 10 | Extended Data Fig. 10c | Spleen, pLN, mLN, n=4.                                                                                                                                                                                                                                                                                                          |
|                       | Extended Data Fig. 10e | Spleen, pLN, mLN, n=4.                                                                                                                                                                                                                                                                                                          |
|                       | Extended Data Fig. 10f | Spleen, pLN, mLN, lung, liver, colon LP, thymus, n=5.                                                                                                                                                                                                                                                                           |
|                       | Extended Data Fig. 10g | Perinate, n=4; adult, n=4.                                                                                                                                                                                                                                                                                                      |
