# Supplementary material for: Regulatory T Cells Function in Established Systemic Inflammation and Reverse Fatal Autoimmunity
Source: PubMed Central journal article supplement (PMC9341271; doi:10.1038/s41590-021-01001-4), 2021-08-23
Supplement: NIHMS1820168-supplement-Supplementary_Figure_1.pdf [file NIHMS1820168-supplement-Supplementary_Figure_1.pdf]

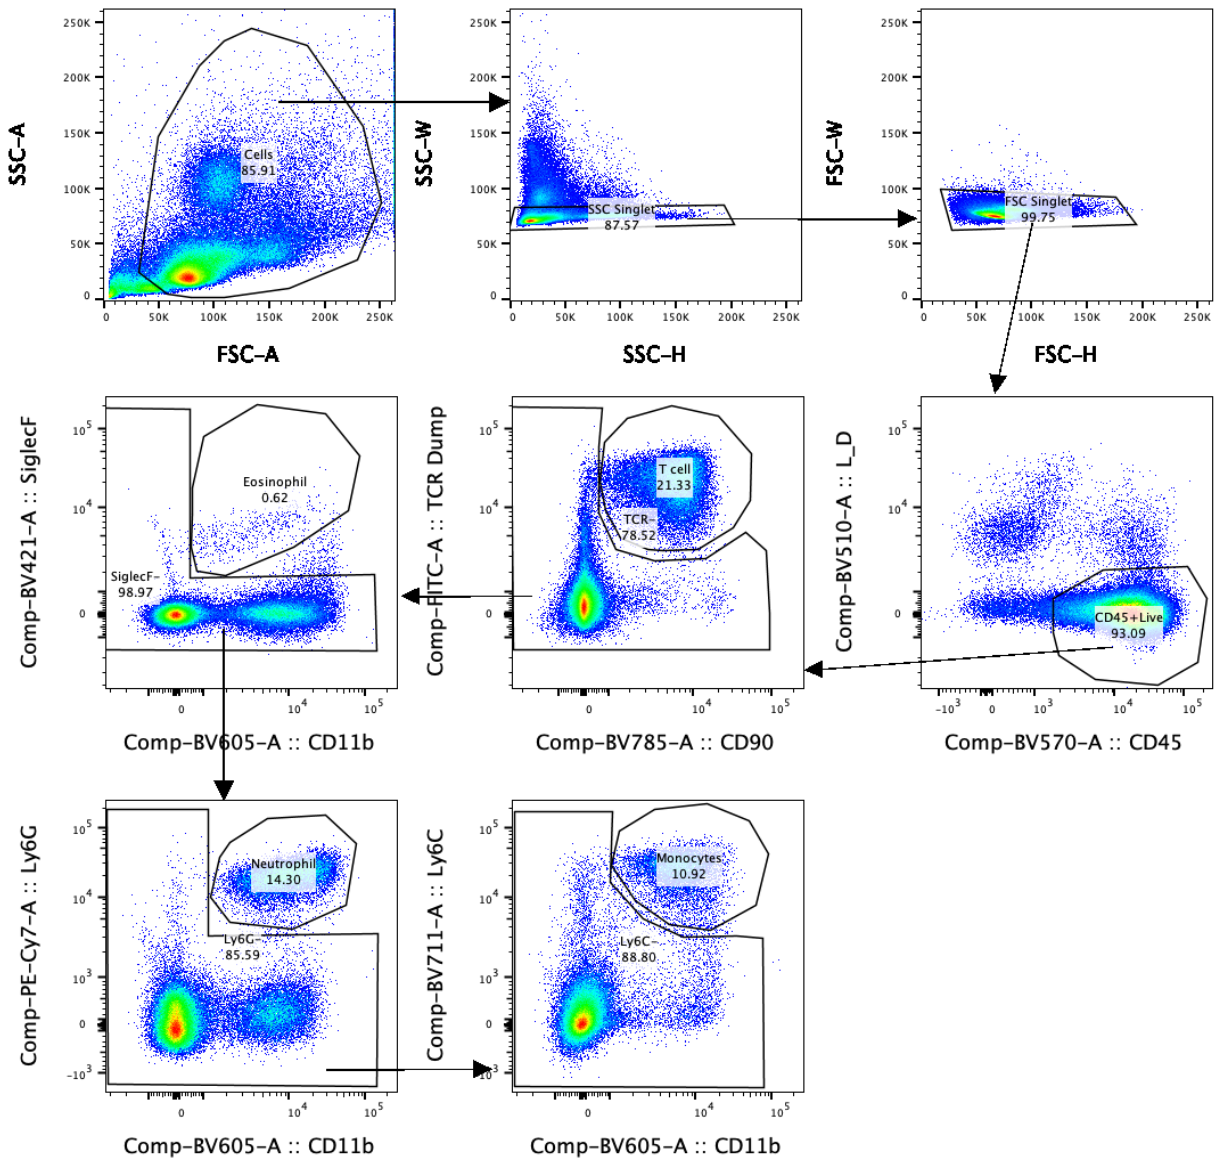

Supplementary Figure 1 | Gating strategies for myeloid cell populations.
