# Supplementary material for: Regulatory T Cells Function in Established Systemic Inflammation and Reverse Fatal Autoimmunity
Source: Nat Immunol. Author manuscript; Available in PMC 2022 Aug 1. (PMC9341271; doi:10.1038/s41590-021-01001-4)
Supplement: Supplementary Table 1 [file NIHMS1820168-supplement-Supplementary_Table_1.xlsx]

## Sheet: table_clusters_counts.txt
Cluster 0 genes	Score	Fold Change	pvalue		Cluster 1 genes	Score	Fold Change	pvalue		Cluster 2 genes	Score	Fold Change	pvalue		Cluster 3 genes	Score	Fold Change	pvalue		Cluster 4 genes	Score	Fold Change	pvalue		Cluster 5 genes	Score	Fold Change	pvalue		Cluster 6 genes	Score	Fold Change	pvalue		Cluster 7 genes	Score	Fold Change	pvalue		Cluster 8 genes	Score	Fold Change	pvalue		Cluster 9 genes	Score	Fold Change	pvalue
Klf2	27.3827	1.60319	6.24193e-144		Ifngr1	7.71158	0.56748	1.46559e-12		Rab11fip2	4.13281	0.510224	0.00025681		Bcl2	13.5074	1.26842	2.21687e-34		Ms4a4b	-21.385	-2.69748	4.18038e-71		Rgs10	-13.9164	-1.51127	2.24417e-34		H2-K1	17.0332	0.868784	1.47748e-50		Srgn	17.0686	1.82702	1.85997e-49		Icos	17.1483	2.06098	5.02964e-50		Lsp1	18.1273	2.17184	8.69647e-47
Ly6c1	22.843	3.74181	3.62586e-98		Gbp2b	7.56117	1.7098	4.69319e-12		2610204G07Rik	3.8252	0.893923	0.000821839		Ccr7	11.8483	1.4509	1.0393e-26		Gnb2l1	-17.7916	-1.29634	1.46407e-54		Izumo1r	-12.7644	-1.23405	9.42806e-30		Malat1	16.4953	0.841	8.61503e-48		Bcl2a1b	16.7999	2.50914	4.03159e-48		AW112010	15.7424	1.16072	1.32634e-44		Tmsb4x	17.6615	1.35097	2.14974e-46
Sell	21.8883	1.65247	2.39149e-95		Ccr9	6.92136	1.71569	3.01041e-10		Trps1	3.58473	0.550938	0.001894		Rgs10	11.8065	0.860511	1.12749e-26		Fau	-17.5883	-0.916182	1.46407e-54		Tpt1	-12.6734	-0.604747	1.34895e-29		Shisa5	16.3663	0.935508	9.93275e-48		Tnfrsf4	14.4731	2.14739	7.66089e-38		Maf	15.546	1.69328	1.73672e-43		S100a10	17.0435	2.74024	5.41498e-42
Satb1	20.7249	1.59851	1.56184e-85		Socs3	6.09007	0.691914	4.27778e-08		Naip5	3.5503	0.953021	0.00212787		Pdcd4	11.36	0.80586	8.2241e-25		Ms4a6b	-16.791	-1.38344	8.43322e-50		Eef1b2	-12.3412	-0.916908	5.39723e-28		Mbnl1	16.258	1.13709	9.13263e-47		Itm2c	13.9105	1.33228	1.50872e-35		Capg	12.8219	1.21704	1.25638e-30		Actg1	16.7416	2.01338	3.27025e-42
Tpt1	19.3832	0.445317	9.01005e-76		Gm14085	6.00533	1.20972	6.95071e-08		Dusp1	3.28315	0.487685	0.00500713		Foxp1	11.3341	1.03616	1.02576e-24		Tpt1	-16.159	-0.836984	1.53359e-47		Cd3d	-11.5619	-0.774257	3.94795e-25		H2-D1	15.6966	0.832482	2.01371e-44		Rilpl2	13.4062	2.45516	2.26464e-32		Glrx	12.6301	2.0103	5.46931e-29		Coro1a	16.6522	1.32607	9.12697e-44
S1pr1	18.6366	1.48902	2.495e-70		Hoxb4	5.44171	1.14259	1.278e-06		Gucy1a3	3.1482	1.05376	0.00758021		Arhgef1	11.1479	0.674497	4.95709e-24		Eef1a1	-15.0681	-1.00988	3.17072e-41		Limd2	-11.5359	-0.856162	4.99996e-25		AW112010	15.5492	1.16715	2.49842e-44		Hspa5	13.2842	1.37005	1.0107e-32		Arl5a	12.1681	2.12891	4.37293e-27		Gmfg	16.5592	2.23241	3.27025e-42
Tsc22d3	18.2818	1.22209	1.25743e-67		Lrrc32	4.83439	0.597118	2.10562e-05		Bicd1	3.14752	0.657749	0.00759185		Eef1a1	11.0625	0.573798	8.45696e-24		Eef1b2	-14.6722	-1.19993	1.28228e-39		mt-Nd4	-11.5217	-0.595887	6.75355e-25		Ptprc	15.5478	1.02476	3.59969e-44		Tnfrsf9	12.9434	2.52655	9.04318e-31		Ighm	11.7324	1.01904	4.55336e-26		Arhgdib	16.5223	1.41498	6.01894e-43
Ms4a4b	17.2071	0.659466	1.02925e-60		Gm30948	4.61643	1.8462	5.55658e-05		Prdm5	2.95977	1.21363	0.013096		Fau	10.9301	0.462856	2.85949e-23		Naca	-14.1019	-1.02917	1.22271e-36		Eef1a1	-11.3805	-0.700049	3.44849e-24		H2-Q7	15.4725	0.945536	2.41179e-43		Cd2	12.897	0.887175	1.95159e-31		Klf2	-11.3135	-2.62856	4.07357e-23		Cdc42	16.4577	1.59905	2.31659e-42
Igfbp4	16.1287	3.12351	7.41438e-53		Tspan3	4.58536	0.487645	6.15945e-05		Gm3164	2.9275	1.20946	0.0143324		Eef1b2	10.8357	0.631051	6.46263e-23		Klf2	-14.0634	-3.56134	4.07058e-35		mt-Co1	-11.1673	-0.561202	1.77854e-23		Ighm	15.1006	1.33355	6.23497e-42		Cd82	12.8276	1.62622	1.6347e-30		Evl	-11.02	-1.82547	7.52257e-23		Arpc1b	16.4242	1.5726	1.35095e-42
Bcl2	15.1595	0.976144	1.22476e-47		Sh3bgrl2	4.37173	0.995621	0.000146445		Gpm6b	2.90076	0.679596	0.0154054		Ms4a4b	10.7909	0.679654	8.30389e-23		Eef2	-13.7566	-1.10193	3.87566e-35		mt-Atp6	-10.9404	-0.481265	1.24968e-22		B2m	14.7195	0.859871	4.12985e-40		Zfp36l1	12.1233	1.45872	1.21138e-27		Ly6a	10.8444	1.44152	4.00355e-22		Tspo	16.3241	1.74065	5.36304e-42
Pdlim1	15.1009	1.3126	2.83862e-47		Cybb	4.26742	0.70787	0.000220169		Ift80	2.89073	0.274949	0.0158341		Cox7a2l	10.6713	0.587766	2.44969e-22		Ptpn18	-13.6322	-0.881414	4.40325e-35		Gnb2l1	-10.7313	-0.684219	8.70675e-22		Ikzf2	14.5053	1.18621	3.52182e-39		Cd3g	11.9455	0.761825	3.38203e-27		Itgae	10.6466	1.55163	2.00506e-21		Itgb7	16.257	1.64827	3.27025e-42
Rasgrp2	15.0882	1.36719	3.7802e-47		Tgm2	4.20841	1.61806	0.000279085		Zfp831	2.6589	0.389274	0.0291363		Rapgef6	10.6636	0.776166	2.75277e-22		Tmsb10	-13.5427	-0.818765	2.69118e-34		mt-Cytb	-10.617	-0.540005	2.15748e-21		Gimap3	14.0929	0.922073	4.45354e-37		Trac	11.8507	0.875964	5.94415e-27		S100a11	10.5473	1.23573	2.58028e-21		Actb	16.0801	1.24082	3.27025e-42
Txk	14.7759	1.45973	3.45773e-45		Arl5c	4.15266	0.398652	0.000340626		Hdac11	2.6151	1.43012	0.0326445		Evl	10.6391	0.908191	3.72497e-22		Cd47	-13.4385	-1.47797	9.71239e-34		Bcl2	-10.3522	-1.74899	2.35266e-20		Foxp3	13.9114	1.7439	9.34468e-36		Cd83	11.724	2.51392	1.64403e-25		Matk	10.0391	1.43642	4.16297e-19		S100a13	15.9279	2.03768	5.62971e-40
Actn1	13.7067	1.35842	3.0283e-39		Il4ra	3.97285	0.430048	0.000660977		E130208F15Rik	2.5954	0.755082	0.0343145		Tpt1	10.6026	0.443565	4.08231e-22		Eef1d	-13.422	-1.1102	8.0518e-34		Atp5g2	-10.3508	-0.886443	2.33342e-20		Cd2	13.6232	0.983329	6.94986e-35		Tnfrsf18	11.6354	1.22989	9.86188e-26		Itm2b	9.95218	0.701646	6.79956e-19		Emp3	15.8463	1.59943	3.40266e-41
Tmsb10	13.6884	0.386318	3.69604e-39		Stat1	3.86037	0.250489	0.000997231		Neurl3	2.58175	0.289277	0.035457		Ift80	10.3247	1.09762	7.43767e-21		Cox7a2l	-13.3492	-1.0546	9.04955e-34		mt-Co3	-10.334	-0.481237	2.35266e-20		Laptm5	13.5983	0.940793	7.5813e-35		Batf	11.4449	2.23609	2.34559e-24		Ctla4	9.90022	1.34655	1.20697e-18		Anxa6	15.6136	2.00093	1.4671e-39
Lef1	13.5902	0.896772	1.1112e-38		Ighm	3.73449	0.241937	0.00152278		Sh2d1a	2.53885	0.210883	0.0394977		Nsg2	10.2343	1.48123	1.81e-20		Samhd1	-13.0557	-1.44281	1.01449e-31		Npm1	-10.1518	-1.12933	2.32284e-19		Ly6e	13.4956	0.891665	2.94028e-34		Nfatc1	11.2449	1.61855	4.15688e-24		Fgl2	9.6583	2.12418	1.7358e-17		Prr13	15.5403	2.03421	8.9738e-39
Cytip	13.3255	0.609834	2.5754e-37		Ifit1bl1	3.72618	0.504235	0.00156584		Gm17173	2.4877	0.606119	0.0447179		Gnb2l1	10.1882	0.517323	1.76873e-20		Selplg	-12.8083	-1.32325	4.67437e-31		Naca	-10.0841	-0.698301	1.71899e-19		Ptprcap	13.4769	0.890482	1.82161e-34		Klf2	-11.1888	-2.36879	1.42805e-23		Ptprcap	9.2973	0.597778	1.22448e-16		Sh3bgrl3	15.4065	1.54435	2.63696e-38
Gnb2l1	13.2403	0.410751	8.70871e-37		Gimap7	3.62724	0.249436	0.00215605		Zbtb20	2.47375	0.267002	0.0461689		Eef2	9.88795	0.568561	2.68366e-19		Saraf	-12.7984	-1.28635	5.96308e-31		mt-Co2	-10.004	-0.473307	3.71185e-19		Rhoh	13.3714	0.926329	8.2889e-34		2020-09-07	11.1701	1.03101	5.11617e-24		Ubl3	9.2237	1.09432	2.48037e-16		S100a11	15.4047	2.48904	3.19492e-37
Ms4a4c	12.8167	1.93189	1.61898e-34		Hpgds	3.6134	0.910886	0.00226389		St6galnac3	2.4691	0.460095	0.0466693		Ccnd3	9.87778	0.834153	3.46598e-19		Coro1a	-12.4332	-0.866052	1.96254e-29		mt-Nd2	-9.96108	-0.507633	3.71185e-19		Serinc3	13.2392	1.22499	4.54916e-33		Nfkbia	10.9567	1.4955	7.107e-23		Sdc4	9.17222	1.73722	5.56489e-16		Gnai2	15.0626	1.4026	9.90013e-38
Eef1b2	12.1851	0.421926	2.14946e-31		Immp2l	3.57039	0.748912	0.00260204		D830030K20Rik	2.46509	0.988115	0.0471507		Smad7	9.84804	0.921408	3.92859e-19		Tmsb4x	-12.4323	-0.716733	1.96254e-29		Pfdn5	-9.94679	-0.603745	4.18889e-19		Ifngr1	13.2014	1.39026	8.22733e-33		Ptprcap	10.7757	0.713712	1.43228e-22		mt-Nd2	-9.13441	-0.530054	5.53714e-16		Itgb1	14.677	2.88774	1.5998e-34
Cd9	12.1358	1.17068	3.73005e-31		Hoxb3	3.54173	1.31934	0.00283423		Col27a1	2.46466	1.44898	0.0471858		Sell	9.71261	1.18526	1.30306e-18		Npm1	-12.2612	-1.4899	5.35495e-28		Fau	-9.86516	-0.469589	8.47166e-19		Srrm2	12.8523	0.957464	2.45867e-31		Eea1	10.7374	2.15377	6.95773e-22		Bcl2	-9.05721	-1.63218	1.58696e-15		Myl6	14.5945	1.39595	1.26363e-35
Stk38	11.7646	0.808269	2.30304e-29		Bcl2l15	3.53447	1.0497	0.00290149		Sh3gl3	2.46319	0.545412	0.0473319		9930111J21Rik2	9.41546	0.842763	1.83998e-17		Bcl2	-12.1206	-2.1617	1.7045e-27		Btf3	-9.7001	-0.715049	4.17302e-18		Ddx5	12.7838	0.782572	3.74902e-31		Orai1	10.7027	1.65743	6.84867e-22		Trac	8.95149	0.670817	1.72477e-15		Cnn2	14.3874	1.29609	1.26363e-35
Foxp1	11.5064	0.64863	3.78912e-28		Fsd1l	3.40614	0.96814	0.0043161		E130308A19Rik	2.43124	0.550974	0.0509943		Rgs1	9.35088	1.04617	3.05788e-17		Pabpc1	-12.0152	-1.07823	1.5956e-27		Ift80	-9.47038	-1.62374	3.11057e-17		Gpx4	12.7506	1.02062	6.68933e-31		Zap70	10.6882	1.26225	5.45955e-22		Ms4a4b	-8.93892	-0.917485	2.26662e-15		Clic1	14.3673	1.37412	1.05883e-34
Treml2	11.4658	1.32381	6.83746e-28		Arrdc4	3.4035	0.610114	0.00434534		Prrt1	2.40031	0.645939	0.054866		Ms4a6b	9.3279	0.525417	3.1813e-17		Il2ra	-11.8282	-2.70759	3.66299e-26		Mrpl52	-9.37967	-0.931885	4.8868e-17		Pim1	12.7345	1.35959	6.9607e-31		Rgs16	10.682	3.20394	1.68541e-21		Tcf7	-8.93391	-2.13272	3.42114e-15		Cfl1	14.309	1.27017	9.14325e-35
Gpr146	11.1805	1.79103	1.75435e-26		Jun	3.37493	0.303222	0.00472539		Tbc1d4	2.39904	0.313131	0.0550206		Bcl11b	9.31261	0.649675	3.8647e-17		Sell	-11.6867	-4.06242	2.24202e-25		Cox7c	-9.27751	-0.730646	1.29025e-16		H2-T23	12.6449	0.90913	1.23409e-30		Tnfrsf1b	10.5346	1.60718	2.13882e-21		Pdlim1	-8.90039	-3.04976	6.23833e-15		Rac2	14.2839	1.13781	1.93536e-35
St8sia6	11.1503	1.27641	1.93622e-26		Camk2n1	3.26782	0.566936	0.00651717		Pde7a	2.39683	0.460126	0.0553027		Smc4	9.22414	0.675472	8.52599e-17		Crlf3	-11.5733	-1.44619	1.03592e-25		Tomm7	-9.24633	-0.78908	1.31329e-16		Itgae	12.5997	1.73091	2.92626e-30		Tgfb1	10.5124	1.17512	2.13882e-21		Neb	8.88096	2.17373	4.84321e-15		Ifi27l2a	14.2821	2.21938	2.27534e-33
Ccr7	10.9055	0.951758	2.15367e-25		Gm4951	3.23857	0.586244	0.00712017		Plcb4	2.33908	0.49425	0.0632675		mt-Co1	9.12386	0.447672	2.00052e-16		Cytip	-11.5068	-1.21061	1.3821e-25		Ctss	-9.06685	-0.944986	5.7646e-16		Trac	12.5269	0.943352	2.92626e-30		Cd3e	10.4523	0.764911	2.58856e-21		Smco4	8.77349	1.23755	6.87241e-15		Flna	14.2727	2.16426	2.24643e-34
Fam65b	10.8198	0.737444	5.21362e-25		Grtp1	3.05478	1.85476	0.0120428		Sptb	2.24714	2.23747	0.0776183		S100a11	-9.01955	-1.36502	6.97049e-16		Atp1b3	-11.409	-1.5689	4.7818e-25		Hnrnpa1	-9.0353	-1.35618	1.14318e-15		Rnaset2a	12.4128	1.0317	9.50861e-30		Tsc22d3	-10.3689	-2.00425	1.00346e-20		Id3	-8.68855	-2.24159	2.40588e-14		Crip1	14.1579	3.10272	7.46472e-32
Bach2	10.816	1.24885	5.96471e-25		Stim2	3.0244	0.369397	0.01304		Ttn	2.20854	0.436924	0.0838684		Eif3f	8.95066	0.505096	6.97049e-16		Txnip	-11.3986	-1.06843	4.17564e-25		Eef1g	-9.00486	-0.777161	1.18669e-15		Icos	12.3417	1.56331	2.84164e-29		Cd3d	10.3004	0.648447	9.8995e-21		Crlf2	8.54338	1.02785	3.95913e-14		Arpc3	14.0601	1.40402	8.50108e-34
Atp1b3	10.5714	0.576661	6.28812e-24		Pgs1	2.95437	0.274596	0.0156433		Noxa1	2.19612	0.776425	0.0860947		Limd2	8.90119	0.54137	1.12854e-15		Eif3e	-11.3708	-1.03298	3.65922e-25		Eif3m	-8.97464	-0.821591	1.14318e-15		Gimap4	12.2515	0.950855	7.42451e-29		Mmd	10.2889	2.03728	2.32926e-20		Cmtm7	8.46089	1.06334	7.64121e-14		Serf2	14.0586	1.10459	1.5998e-34
Ugcg	10.1132	1.07705	5.88762e-22		Plac8	2.91296	1.55932	0.0175772		Palld	2.18751	1.28638	0.0877054		Chd3	8.85989	0.601817	1.57737e-15		Eef1g	-11.3641	-1.0422	7.82355e-25		Snrpf	-8.86354	-0.881229	3.46974e-15		H2-Q6	12.1041	1.05947	3.60627e-28		Cd74	10.2342	1.80927	2.65394e-20		Timp2	8.42068	1.31291	1.02227e-13		Arpc2	14.0228	1.22925	4.0969e-34
Fau	9.99419	0.242852	1.89674e-21		Socs1	2.90983	0.309579	0.017699		Rgs9	2.16981	0.920618	0.0911008		mt-Atp6	8.82223	0.375876	2.0322e-15		Uba52	-11.3112	-1.20678	5.43784e-25		Eef1d	-8.69854	-0.669566	9.62914e-15		Stat1	11.9597	1.09721	1.29259e-27		Hif1a	10.2323	1.32821	2.04071e-20		Laptm5	8.412	0.562965	9.34994e-14		Tmsb10	13.9569	1.08401	1.54885e-33
Cdkn2d	9.71353	0.834602	2.4066e-20		Gbp8	2.89085	0.326922	0.0185152		Iglon5	2.09614	1.11349	0.105771		Gm42418	8.80343	0.418971	2.13875e-15		Foxp1	-11.135	-1.61132	6.58374e-24		Eif3e	-8.66203	-0.743578	1.18571e-14		Fth1	11.8678	0.657132	2.39299e-27		Pfn1	10.2214	0.711574	2.02712e-20		AU020206	8.3734	1.13319	1.2816e-13		Arpc5	13.885	1.62243	6.33664e-33
Atp1b1	9.58474	1.74711	9.14613e-20		Il2ra	2.86104	0.273116	0.0199634		Gm26669	2.06355	0.500509	0.112981		Znrf1	8.75236	0.892121	3.61808e-15		Rapgef6	-11.0301	-1.18032	1.02482e-23		H3f3a	-8.63347	-0.55704	1.56919e-14		Ypel3	11.8422	0.926489	2.90389e-27		Calr	10.1971	1.04933	2.57165e-20		H2-D1	8.31821	0.383646	1.84791e-13		Cotl1	13.8219	1.37688	1.61027e-33
Smad7	9.47893	0.60459	2.0385e-19		Gpr83	2.84091	0.386623	0.0209624		Tspan3	2.06285	0.235766	0.113101		Igf2r	8.62517	1.14525	1.0036e-14		Chd3	-10.8869	-0.929291	3.51097e-23		Cox4i1	-8.61908	-0.606762	1.73503e-14		Cd3g	11.795	0.751028	4.72804e-27		Ier5	10.1685	1.0066	3.23214e-20		Prdm1	8.28882	1.99907	3.08418e-13		Actr3	13.7503	1.32719	1.06576e-32
Gm11713	9.45027	1.10543	2.84734e-19		Serpina3g	2.77183	0.345129	0.0250334		Hdac9	2.05165	1.07921	0.115809		Capn3	8.59564	1.3248	1.1692e-14		Gm11808	-10.8788	-1.1554	3.48286e-23		Uqcrh	-8.59538	-0.595462	1.87915e-14		Ogt	11.753	0.976498	7.52305e-27		Prkca	10.095	1.33459	8.92681e-20		Ptpn7	8.26717	0.937793	2.73752e-13		Calm1	13.7004	1.38787	3.9372e-32
Slfn1	9.43067	0.67594	3.1528e-19		Rgs1	2.7282	0.281179	0.028068		Kcna3	2.02528	0.822437	0.12206		Pfdn5	8.54973	0.437838	1.57804e-14		Btf3	-10.8136	-0.83665	7.50835e-23		Il7r	8.3983	0.868378	7.09079e-14		mt-Co1	11.734	0.651925	9.76291e-27		Pdcd1lg2	10.0882	2.16825	1.25739e-19		Tmem154	8.22988	1.33836	4.23204e-13		Myl12b	13.527	1.25026	8.89444e-32
Rexo2	9.3436	0.600298	6.87976e-19		Tasp1	2.68882	0.270597	0.0308488		Hist2h3b	2.01854	1.5594	0.123867		Nsa2	8.54045	0.602522	1.6727e-14		Arhgdib	-10.8042	-0.807837	8.00771e-23		Smc4	-8.37799	-0.78395	9.53563e-14		Gimap7	11.7197	1.09097	8.72265e-27		Samsn1	10.0453	1.53909	1.35809e-19		Cd9	-8.19953	-3.06615	8.35976e-13		Ass1	13.45	2.35912	3.46413e-30
Slc17a9	9.2293	1.01417	1.98563e-18		Gbp3	2.68083	0.285051	0.0314472		Pnck	1.99132	1.29888	0.130535		Uqcrh	8.41038	0.471267	4.60439e-14		Kbtbd11	-10.7938	-1.7494	1.08594e-22		Eef2	-8.37404	-0.605229	1.13211e-13		Matk	11.718	1.55701	1.2541e-26		Smco4	10.0012	1.46151	1.59184e-19		Pla2g16	8.19815	0.845564	4.47865e-13		Bin2	13.3994	1.5772	1.82208e-31
Cox7a2l	8.98292	0.32562	1.64559e-17		Epcam	2.65683	0.413954	0.033342		6330403K07Rik	1.98483	0.431177	0.132138		Btg1	8.40648	0.439185	4.92014e-14		Ppia	-10.6071	-0.699576	8.97053e-22		Atp5e	-8.37091	-0.636386	1.16393e-13		Lbh	11.7148	1.08123	1.16715e-26		Rap1a	9.96924	0.864812	1.43822e-19		Cd3g	8.18125	0.477711	4.50041e-13		Atp1b3	13.3771	1.66642	4.14018e-31
Ndrg3	8.97877	0.911259	1.79724e-17		Dtx4	2.64644	0.705105	0.0342034		Ndnf	1.96418	1.13212	0.137585		Gm11808	8.23298	0.600698	1.82417e-13		Eif3f	-10.5903	-0.806154	3.9892e-22		Cox7a2l	-8.34332	-0.625771	1.13211e-13		2810474O19Rik	11.7099	1.08764	1.17718e-26		Junb	9.96708	1.02746	1.80143e-19		Vamp8	8.11088	0.746	7.61989e-13		Gnb2	13.3674	1.44072	2.30213e-31
Pik3ip1	8.96686	0.714875	1.9007e-17		Abcb1a	2.63418	0.386402	0.035202		Nrp1	1.90322	0.164549	0.154752		Akap13	8.22273	0.585346	1.96221e-13		Hspa8	-10.5636	-0.866665	1.27633e-21		Ucp2	-8.25466	-0.773751	2.48277e-13		Ubb	11.6433	0.659204	1.73307e-26		Cst7	9.9132	1.34497	2.94667e-19		S100a13	8.06154	0.8414	1.0555e-12		Cd48	13.3439	1.62115	8.16942e-31
Sorcs2	8.96463	2.3848	2.39415e-17		Rhoh	2.6324	0.123491	0.0353745		Chadl	1.88185	0.99056	0.161111		Naca	8.20112	0.448972	2.16724e-13		Nsa2	-10.4687	-1.03324	1.37505e-21		Lck	-8.24548	-0.558401	2.3612e-13		Maf	11.6257	1.43284	2.92955e-26		Hivep3	9.8162	2.32059	1.42509e-18		Asb2	7.99872	2.49487	2.85961e-12		Selplg	13.3379	1.27008	8.70107e-32
Pitpnc1	8.96115	0.730752	2.00551e-17		Actn2	2.61962	0.865985	0.0364513		Dcun1d4	1.86937	0.526981	0.164919		Tcf7	8.11883	0.947714	4.24226e-13		Ccnd2	-10.3783	-1.24897	4.38606e-21		Eif3k	-8.13957	-0.697167	5.76893e-13		Ltb	11.605	0.848704	3.33252e-26		Tmem243	9.70789	1.31184	1.81235e-18		Cyb5a	7.95931	0.732282	2.30174e-12		Aes	13.3209	1.03169	1.32999e-31
Klf7	8.96055	1.14455	2.11485e-17		Gm20069	2.60001	0.623548	0.0381493		Pcdhga9	1.83732	1.43541	0.175032		Pabpc1	8.11817	0.550777	4.20496e-13		Thy1	-10.3465	-1.42218	5.79926e-21		Pabpc1	-8.11652	-0.673703	7.05019e-13		Gimap6	11.5729	0.870877	3.69444e-26		Ms4a4b	-9.70158	-0.971187	1.34529e-18		Sell	-7.88888	-2.10535	5.63843e-12		Fxyd5	13.3169	1.13213	1.80479e-31
Gm11808	8.94773	0.425571	2.20537e-17		Src	2.57958	0.608597	0.0399433		Acad11	1.83221	0.652512	0.176561		Ptpn18	8.11541	0.417589	4.20766e-13		Actb	-10.2821	-0.660116	1.08489e-20		Atp5j	-8.11505	-0.693634	6.70236e-13		Il7r	11.4802	1.34583	1.38919e-25		Txnip	-9.68497	-1.00005	1.54152e-18		Ccr7	-7.8354	-2.26269	8.93935e-12		Abracl	13.2086	1.45486	1.09041e-30
Rab3ip	8.74165	0.94943	1.30761e-16		A630091E08Rik	2.53998	1.16881	0.0438624		Gucy1b3	1.83009	0.869743	0.177271		Fyb	8.04044	0.524287	7.4528e-13		9930111J21Rik2	-10.2037	-1.32733	2.26046e-20		Eif1	-8.07688	-0.421548	8.39124e-13		Akap13	11.4762	0.984918	1.32654e-25		Twsg1	9.61063	1.99983	5.69526e-18		Pkp3	7.73877	0.96168	1.1323e-11		Capzb	13.203	1.41575	5.55308e-31
Rcn1	8.65947	0.879003	2.57762e-16		Pafah1b3	2.51608	0.359777	0.04625		Pkhd1l1	1.82794	2.4074	0.178163		Gm8730	8.005	0.773978	9.23936e-13		Ccr7	-10.1966	-3.17918	5.62549e-20		Cd3g	-7.98752	-0.510839	1.62312e-12		Cd3e	11.4519	0.832009	1.08206e-25		Relb	9.49775	1.46489	9.39312e-18		Podnl1	7.73066	2.0087	1.53616e-11		Mrpl33	13.2017	1.58695	1.12087e-30
Cd55	8.5827	1.35414	5.15357e-16		Tlr12	2.50348	1.1569	0.0476483		Tiam2	1.80377	2.04483	0.185898		Maf	-7.97762	-1.20782	1.24102e-12		Psmb8	-10.1903	-0.664321	2.26046e-20		Prdx2	-7.89527	-0.859827	3.45196e-12		Gm42418	11.3303	0.692036	4.65042e-25		Pdcd1	9.43583	2.19563	2.13107e-17		Gimap7	7.5577	0.772349	3.81101e-11		S1pr4	13.0661	2.26576	2.99099e-29
Trib2	8.57599	0.810675	5.01499e-16		Ssbp2	2.49878	0.223944	0.0481497		Npm2	1.80083	2.82244	0.186967		Mxd4	7.91288	0.823793	1.88768e-12		Eif3h	-9.99547	-0.828798	8.18994e-20		Rgs1	-7.89301	-1.39991	3.91511e-12		Cd27	11.2984	0.797601	4.55341e-25		Mrps6	9.29028	1.53189	5.83922e-17		Tnfrsf1b	7.55379	1.18569	4.01097e-11		Klf2	13.0057	1.8147	5.76175e-30
Gm13546	8.45847	2.43774	1.59259e-15		Card6	2.47509	0.334176	0.0507268		Ift43	1.79866	0.903056	0.187584		Hmha1	7.90295	0.465811	1.88768e-12		Uqcrh	-9.98087	-0.732747	8.30372e-20		Shfm1	-7.83369	-0.644486	4.75363e-12		Tmbim6	11.2941	0.868894	4.23064e-25		Itgb8	9.28415	1.91905	6.4802e-17		Atp1b3	-7.50892	-1.01	6.37954e-11		Naca	13.0035	1.05797	2.01051e-30
Kbtbd11	8.34759	0.52141	3.12249e-15		Ccdc38	2.46828	1.08308	0.0515198		Astl	1.79736	1.82244	0.187985		Traf3ip3	7.90134	0.590992	1.88768e-12		Ltb	-9.95092	-0.750579	1.38918e-19		Atp5c1	-7.8225	-0.710695	5.30481e-12		Itpkb	11.2852	1.11403	6.97481e-25		H2-K1	9.17791	0.475716	1.06017e-16		Lamtor4	7.46018	0.745057	6.94046e-11		Lgals1	12.9812	3.67137	9.10212e-28
Tdrp	8.31335	2.85184	5.04567e-15		Medag	2.45392	1.31755	0.0532123		BC035044	1.77908	1.23747	0.194417		mt-Nd4	7.89569	0.384239	2.02423e-12		Cox4i1	-9.94953	-0.718145	1.38918e-19		Eif3f	-7.7928	-0.544802	6.14997e-12		Ubl3	11.2837	1.39401	9.03708e-25		Gimap5	9.10465	1.06835	2.2527e-16		Leprotl1	7.43194	0.61114	8.4518e-11		Pfn1	12.8174	1.06482	1.01377e-29
Galnt10	8.29403	1.29025	5.07827e-15		Ppm1n	2.44638	1.16357	0.0541164		Nrn1	1.77205	0.366946	0.196794		Eif3e	7.884	0.518288	2.07021e-12		Npc2	-9.94953	-1.0115	1.57317e-19		Sdhaf1	-7.69745	-1.3596	1.25909e-11		Asxl2	11.2631	1.24435	9.14871e-25		Bcl2a1d	9.08699	2.67491	4.64017e-16		Ccr2	7.40703	2.61413	1.36019e-10		Polr1d	12.7885	1.39711	2.77478e-29
1700025G04Rik	8.28653	1.64766	5.48075e-15		AW112010	2.42775	0.131278	0.0564754		Phlpp1	1.77107	0.386464	0.196902		Arhgap15	7.85892	0.615511	2.50443e-12		Slfn1	-9.82379	-1.79024	6.49783e-19		mt-Nd1	-7.68111	-0.455068	1.47163e-11		Son	11.2482	0.756577	8.19121e-25		Cd81	9.06385	1.65349	4.30034e-16		Unc119	7.38822	1.33406	1.35244e-10		Eif3h	12.6984	1.12475	3.19158e-29
Uba52	8.26262	0.383341	6.10513e-15		Foxp3	2.38345	0.223792	0.0621136		Zfp612	1.76146	0.982902	0.200435		Treml2	7.83457	1.33259	3.21146e-12		Cfl1	-9.73072	-0.689439	1.12741e-18		Gpr83	-7.6762	-2.29796	1.90757e-11		Spcs2	11.2366	0.867451	9.55029e-25		Rel	9.02944	1.93566	6.94057e-16		Grn	7.34297	1.99075	2.04999e-10		Vim	12.5505	2.89037	1.71554e-26
Aven	8.21458	0.80239	9.07555e-15		Cyp26b1	2.36424	1.69606	0.0649055		Susd4	1.75789	0.7856	0.201556		Izumo1r	7.81716	0.539132	3.26427e-12		Gm8730	-9.6753	-1.55117	1.63028e-18		Atp5l	-7.67263	-0.626913	1.41527e-11		Arl6ip1	11.1805	0.864077	1.48935e-24		Dad1	8.97036	0.673805	5.42797e-16		S1pr1	-7.29059	-1.74801	2.96234e-10		Oaz1	12.5045	1.12641	4.30017e-28
Cnn3	8.06239	3.0487	3.62207e-14		Gng12	2.2948	0.45088	0.0754736		Tnfsf8	1.75001	0.284736	0.204423		Kmt2a	7.80871	0.692616	3.66996e-12		Hnrnpf	-9.66887	-0.635365	1.45311e-18		Nsa2	-7.63757	-0.715304	1.68872e-11		Lcp1	11.1003	0.93861	3.08155e-24		Hdac7	8.83878	1.4486	2.21967e-15		Tnfrsf18	7.27838	0.780321	2.31568e-10		Pycard	12.4747	2.28699	1.85793e-26
Pecam1	8.05113	0.72528	3.22278e-14		Slc39a6	2.28343	0.468032	0.0772901		Ttc8	1.747	1.05192	0.205534		Eif3h	7.70271	0.480347	7.39971e-12		Gltscr2	-9.63407	-1.01105	1.99515e-18		Rapgef6	-7.62339	-0.76	1.88217e-11		Ahnak	11.0645	1.69617	8.83163e-24		Maf	8.83558	1.09576	1.61244e-15		Serinc3	7.11679	0.679252	6.74136e-10		Rap1b	12.4212	1.38528	9.63313e-28
Il6ra	7.92975	0.634033	8.13707e-14		Trim30c	2.26527	1.73913	0.0802008		2310001H17Rik	1.73874	0.195955	0.208341		Uba52	7.69233	0.548877	7.85176e-12		Mcl1	-9.62449	-0.777577	2.00244e-18		Pdcd4	-7.61272	-0.710184	1.9981e-11		Prrc2c	11.0499	0.949629	5.37158e-24		Sdf4	8.78724	1.18791	4.13654e-15		Ccr5	7.10714	3.78228	1.16072e-09		Rbm3	12.4167	1.55992	3.28204e-27
Npc2	7.8596	0.373952	1.37765e-13		Enpp5	2.23919	0.633219	0.08443		Gm4876	1.72211	1.27812	0.214583		Eef1d	7.60672	0.453828	1.44107e-11		Twf2	-9.60139	-1.21281	2.96484e-18		Mxd4	-7.59835	-1.02967	2.57944e-11		Peli1	10.9809	0.94873	1.08332e-23		Stx11	8.74972	2.29041	5.80026e-15		Eva1b	7.09816	0.919278	8.04711e-10		Hint1	12.3766	1.34969	1.65562e-27
Fam101b	7.84957	0.983707	1.54893e-13		Tapbpl	2.19668	0.211202	0.0920615		Gm14410	1.69906	1.53293	0.223346		Zfos1	7.59713	0.855556	1.5686e-11		B2m	-9.59268	-0.545279	3.25633e-18		Pold4	-7.58768	-1.28665	2.55358e-11		Itm2b	10.9514	0.699565	9.01525e-24		Cyfip1	8.70024	1.52737	6.36192e-15		Ctla2a	7.09495	2.36061	1.12843e-09		Ppp1ca	12.3555	1.44029	5.27455e-27
Tcf7	7.83839	0.58238	1.61551e-13		Cxcr5	2.19022	0.360712	0.0932054		Matn2	1.69269	0.565529	0.225445		Actn1	7.55497	1.12082	2.16087e-11		Stat1	-9.56169	-1.04317	4.11226e-18		2700060E02Rik	-7.536	-0.783122	3.34964e-11		Tap1	10.9436	1.01287	1.24799e-23		H3f3b	8.67433	0.564636	5.33164e-15		St8sia6	-7.06466	-3.00901	1.36914e-09		Tagln2	12.2289	2.31969	6.35484e-26
Nsg2	7.80525	0.742929	2.05965e-13		Sdc4	2.18376	0.299025	0.0944232		Gprasp2	1.65684	0.537035	0.239581		N6amt2	7.53595	0.88476	2.41447e-11		Tsc22d3	-9.51976	-1.55964	6.98853e-18		Arhgef1	-7.52722	-0.550213	3.40124e-11		Psmb9	10.8824	0.892062	1.99777e-23		Eif1	8.58076	0.461951	1.0797e-14		Sec11c	7.04756	0.725464	1.0399e-09		Cox8a	12.1541	1.15553	6.26804e-27
Sema4a	7.80148	2.30363	2.43514e-13		Scn11a	2.17427	1.91845	0.0965181		4732465J04Rik	1.6553	1.30786	0.240223		mt-Co3	7.49406	0.337148	3.23116e-11		2810474O19Rik	-9.51479	-1.07755	5.8537e-18		Tomm20	-7.52206	-0.713457	3.73701e-11		Gimap1	10.8593	0.756853	2.51321e-23		Nfkb2	8.54591	1.60427	1.69985e-14		Smpdl3a	7.03293	0.657919	1.13734e-09		Emb	12.1341	2.12148	3.85951e-26
Eef1g	7.79556	0.323507	2.28684e-13		Lztfl1	2.15134	0.369177	0.10092		Dtx4	1.65318	0.465427	0.241038		Dgka	7.45892	0.632967	4.08361e-11		mt-Atp6	-9.47742	-0.440815	5.90881e-18		Gapdh	-7.51454	-0.747055	4.80989e-11		Psmb8	10.8475	0.712075	2.70341e-23		2310001H17Rik	8.54496	1.23204	1.66819e-14		Ctsb	7.01732	0.921222	1.2969e-09		H3f3a	12.1097	0.917695	3.75827e-27
Arl4c	7.77436	0.599716	2.59804e-13		Fbxl21	2.12604	1.69606	0.106309		Dscam	1.64711	0.809613	0.243666		Slfn1	7.44654	0.795833	4.33625e-11		Smc4	-9.43415	-0.853141	1.07895e-17		Snrpe	-7.50788	-0.700159	4.09233e-11		Btg1	10.8045	0.619922	3.43065e-23		Lcp1	8.53576	0.740068	1.66819e-14		Foxp3	6.99922	0.966415	1.36914e-09		Sub1	12.0742	1.27051	1.83775e-26
Srpk1	7.52477	0.411524	1.59301e-12		Pros1	2.11752	0.567736	0.10802		Platr23	1.64195	2.33701	0.245826		Sesn3	7.42849	0.823038	5.14524e-11		H2afy	-9.35967	-0.953256	1.91234e-17		N6amt2	-7.48762	-1.4245	4.73164e-11		Samhd1	10.7828	0.946973	4.8995e-23		Tox	8.36325	1.1494	5.99974e-14		B2m	6.97605	0.38305	1.50317e-09		Cox4i1	11.9945	1.03684	2.08928e-26
Add3	7.50041	0.571733	1.90263e-12		Fbln2	2.10726	1.48795	0.110276		Hdgfrp3	1.64179	0.263069	0.245748		mt-Co2	7.34776	0.341255	8.79132e-11		Srpk1	-9.35507	-1.14733	1.95691e-17		Ighm	-7.48188	-0.786044	5.13767e-11		Fxyd5	10.7753	0.730997	4.64083e-23		Izumo1r	8.36181	0.662059	5.79358e-14		Ikzf3	6.96235	1.08359	1.75998e-09		Myo1g	11.9826	2.04637	7.58843e-26
Tmem108	7.43251	2.28002	3.37403e-12		Spsb1	2.09431	0.629659	0.113074		Ston1	1.63568	0.569671	0.248199		Ssh2	7.29889	0.772363	1.25631e-10		Ifi47	-9.33469	-1.11667	2.58603e-17		Fyn	-7.46719	-0.89427	5.01286e-11		Tap2	10.7339	0.954789	7.34834e-23		Edf1	8.2883	0.723592	1.08608e-13		Ly6e	6.94676	0.427972	1.76193e-09		Dock2	11.935	1.38641	4.25453e-26
Dapl1	7.38117	3.0475	5.02349e-12		Gpx4	2.08188	0.113629	0.115687		Pank1	1.63323	0.850452	0.249242		Ddx5	7.28534	0.374894	1.29668e-10		Ifi203	-9.31275	-0.976664	2.99915e-17		Anp32b	-7.46263	-0.766828	5.59833e-11		Ncor1	10.7071	0.90243	9.29744e-23		Psme2	8.2659	0.859928	1.39278e-13		Mthfsl	6.94577	1.07085	1.87278e-09		Ppib	11.928	1.1102	2.24294e-26
Sh3bp5	7.3439	0.786973	5.81559e-12		Zfyve28	2.06487	0.729227	0.119614		RP24-143K11.2	1.62414	1.33701	0.252907		Kbtbd11	7.20393	0.695611	2.28244e-10		Nav2	9.2894	2.12138	4.38732e-17		Il2ra	-7.44965	-1.25929	6.39791e-11		Ptpn7	10.684	1.1674	1.18545e-22		Ubl5	8.26304	0.649284	1.23131e-13		Cox8a	6.93289	0.492323	1.8869e-09		Btf3	11.8998	1.01891	2.89539e-26
Chil5	7.33561	2.26304	6.54544e-12		Adrb1	2.06364	2.37413	0.120008		Gm3411	1.62135	0.838205	0.253707		Mcl1	7.18368	0.46873	2.62043e-10		Bola2	-9.28751	-1.22789	3.80032e-17		Gnas	-7.43618	-0.586247	5.90964e-11		Rbm39	10.6833	0.630363	1.01993e-22		Ostc	8.19538	0.854643	2.05759e-13		Treml2	-6.9306	-2.98501	2.89094e-09		S100a6	11.8723	4.0193	3.43503e-24
Rasa3	7.23312	0.807269	1.23125e-11		Icosl	2.03033	0.93356	0.127753		Ccdc88a	1.61535	0.994618	0.256543		Glrx	-7.09904	-1.30572	5.88215e-10		Ablim1	-9.24098	-0.993461	4.95105e-17		Ssr4	-7.42229	-0.842027	6.77805e-11		Pla2g16	10.683	0.99254	1.01957e-22		Slc26a2	8.19188	1.60875	2.59198e-13		Lztfl1	6.88304	1.71096	3.21571e-09		Ms4a4b	11.8257	1.09564	5.16706e-26
Lmo4	7.21187	1.22704	1.46322e-11		Xlr	2.02466	1.40918	0.129282		Zfhx3	1.61464	4.4074	0.257106		Mllt3	7.08166	0.87703	5.62452e-10		Mndal	-9.23214	-0.991878	5.52775e-17		Nfkb1	-7.3961	-0.890763	7.84022e-11		H3f3b	10.6723	0.7315	1.39102e-22		St13	8.19125	0.815311	2.05759e-13		Hspe1	-6.87293	-0.891774	3.71446e-09		Arpc4	11.7874	1.42674	1.84521e-25
Dph5	7.18823	0.725947	1.67971e-11		Islr	2.01981	1.25549	0.130456		Gm21975	1.59909	0.419209	0.26316		Rbm39	7.05584	0.381164	6.19555e-10		Pdlim1	-9.20637	-2.59414	1.00003e-16		Klf2	7.35902	0.799373	8.40841e-11		Clec2d	10.6155	0.759331	2.19762e-22		H2afz	8.1386	1.08225	3.82485e-13		Npc2	6.84432	0.630172	3.34158e-09		Myl12a	11.731	1.22436	2.29806e-25
Evl	7.03044	0.384535	4.8405e-11		Fam189b	2.0143	0.15203	0.131626		Chrne	1.59391	1.32767	0.265276		Eif3k	7.02013	0.479695	7.61695e-10		Atp5h	-9.18006	-0.633015	7.42589e-17		Atp5j2	-7.32855	-0.556076	1.17959e-10		Fgl2	10.6104	1.99087	3.29655e-22		Cyba	8.11944	0.691896	3.69104e-13		Reep5	6.83682	0.748446	3.41224e-09		Arf5	11.6714	1.10089	3.26497e-25
Cd47	7.02823	0.323849	4.93352e-11		Pde2a	1.9856	0.272693	0.138447		Fam174b	1.59022	0.547159	0.266637		Ly6a	-6.99892	-1.00906	9.51661e-10		Fyb	-9.16876	-0.737618	7.42263e-17		Cox5b	-7.31194	-0.69962	1.39161e-10		Morf4l1	10.6086	0.853591	2.29317e-22		Sub1	8.10912	0.660828	3.67824e-13		Snx2	6.82013	0.955883	3.80833e-09		Sec61b	11.6643	1.2797	7.89413e-25
Prkd3	6.98395	1.5963	6.88556e-11		Chn2	1.96722	0.524205	0.143231		Dync2li1	1.57817	1.28638	0.271711		Pik3ip1	6.98374	0.844846	9.72996e-10		Gm42418	-9.15338	-0.511643	8.84373e-17		Ccr7	-7.29098	-1.68407	1.80814e-10		Sec62	10.596	0.834409	2.2146e-22		Aldoa	8.07561	0.833428	5.06555e-13		Nop56	-6.75938	-1.50686	6.82046e-09		S100a4	11.6247	3.92767	1.87683e-23
Pdk1	6.97031	0.621366	7.26691e-11		Dhrs3	1.96207	0.558557	0.144629		Agbl5	1.56986	0.624498	0.275157		mt-Cytb	6.97394	0.334188	1.02421e-09		Tomm20	-9.13244	-0.901961	1.11609e-16		Cyba	-7.21204	-0.612425	2.64255e-10		Psen2	10.5313	1.19575	4.79829e-22		M6pr	8.0588	1.15331	6.05729e-13		Cyba	6.75602	0.532034	5.50466e-09		Msn	11.5931	1.16184	5.04031e-25
Eef1a1	6.95675	0.212198	8.2166e-11		Hist1h2bc	1.94934	0.458702	0.147853		Gm2244	1.56567	2.14437	0.277246		Matk	-6.97312	-1.12515	1.10711e-09		Maf	9.09498	0.963821	1.03298e-16		Ptma	-7.20579	-0.613829	3.41039e-10		Fnbp1	10.4669	1.17386	9.04425e-22		Nfkb1	8.04685	0.845241	6.04899e-13		Rnase4	6.7489	2.31426	7.28516e-09		Tmem50a	11.5786	1.09503	5.04031e-25
Gramd4	6.93393	0.865834	9.37138e-11		Ddx43	1.92228	0.449622	0.154793		Uchl4	1.56535	1.19441	0.277277		Eif3m	6.94638	0.463736	1.16996e-09		Slfn2	-9.07895	-0.920569	1.55849e-16		Ipcef1	-7.17497	-0.994533	3.23595e-10		Pnrc1	10.4513	0.768925	8.06286e-22		Arpc2	8.01395	0.595206	7.30916e-13		Selk	6.7206	0.583733	6.82046e-09		Clta	11.5681	1.10744	8.01639e-25
Prkcq	6.8585	0.411164	1.50596e-10		Tbxa2r	1.90763	0.25688	0.159162		Gm9242	1.5614	1.62979	0.278977		Ablim1	6.93276	0.574721	1.31851e-09		Igtp	-9.05635	-1.47899	2.24296e-16		Tbc1d4	-7.17476	-1.90174	4.01753e-10		Rnaset2b	10.4389	0.899227	8.6989e-22		Irf4	8.00728	2.50766	1.07942e-12		Arl6ip1	6.69425	0.5272	7.95176e-09		Laptm5	11.4416	0.995915	1.78778e-24
Gm20696	6.84606	1.06419	1.65805e-10		Ston1	1.88617	0.621713	0.165303		Gm8281	1.56076	0.964456	0.27921		Ikzf4	6.92828	0.767101	1.34473e-09		Rexo2	-9.05212	-1.3735	2.49562e-16		Sec61g	-7.16427	-0.600778	3.41039e-10		Tnfrsf18	10.4363	1.0208	8.6989e-22		Tank	7.97469	1.0141	9.87188e-13		Vamp5	6.68735	1.08025	8.61527e-09		Cd52	11.4405	1.19351	2.30476e-24
Cmah	6.84436	0.929663	1.66546e-10		Gm13166	1.88096	1.13967	0.166814		Morn2	1.55793	0.668109	0.280117		St8sia6	6.89159	1.20549	1.75163e-09		S1pr1	-8.98109	-2.11487	5.56913e-16		Shisa5	-7.15936	-0.406574	3.41039e-10		Fyb	10.4024	0.771955	1.39459e-21		Sell	-7.94944	-1.9218	1.52234e-12		Vmp1	6.66665	0.861777	9.56848e-09		Rap1a	11.4247	1.19792	1.95999e-24
Filip1l	6.81938	0.753153	1.93664e-10		Cd86	1.86768	0.280372	0.170919		Mctp1	1.54693	0.480045	0.285075		Ctss	6.88191	0.520524	1.75163e-09		Itga6	-8.95765	-1.60597	5.1644e-16		Eif3h	-7.15837	-0.554339	3.41039e-10		Izumo1r	10.3935	0.798033	1.24263e-21		S100a11	7.9322	0.961715	1.20246e-12		Serpina3g	6.65381	1.39513	1.21694e-08		2020-09-01	11.3757	1.16967	4.90807e-24
Pag1	6.805	0.714961	2.12533e-10		Gimap3	1.85133	0.0823651	0.175611		Fam168a	1.53185	0.257103	0.291924		Icos	-6.86547	-1.04845	2.1567e-09		Serbp1	-8.92927	-0.843127	7.26449e-16		Ephx1	-7.15492	-1.4272	3.70167e-10		Arl5a	10.3914	1.83429	2.49467e-21		Arf6	7.91006	0.891776	1.54063e-12		Ucp2	6.62419	0.562465	1.1921e-08		H3f3b	11.3627	0.894231	2.30476e-24
Ecm1	6.76011	0.7482	2.85556e-10		Dyrk4	1.84683	1.84806	0.177052		Gemin8	1.5212	0.346704	0.296876		Tmsb10	6.8406	0.344313	2.25362e-09		Eif3i	-8.91919	-0.99575	6.54074e-16		Chchd10	-7.15404	-1.84582	4.18567e-10		mt-Co2	10.3893	0.556508	1.5538e-21		Timp2	7.90871	1.28822	1.74583e-12		S100a4	6.58248	1.82573	1.65547e-08		Crlf3	11.3346	1.3651	8.14567e-24
Tanc1	6.73919	1.60253	3.37802e-10		Iigp1	1.84172	0.214999	0.178472		Fam209	1.52021	2.50051	0.297355		Fam169b	6.82421	0.599372	2.54511e-09		Pdcd1	8.89131	2.15869	9.61812e-16		Satb1	-7.14307	-1.44626	4.02759e-10		Myh9	10.3815	0.970829	1.87704e-21		Ftl1	7.88722	0.574008	1.76389e-12		N4bp1	6.57426	1.10941	1.65442e-08		B2m	11.2589	0.803392	5.625e-24
Gm9493	6.71578	0.505778	3.75457e-10		Slc45a4	1.82334	0.316659	0.184254		Apold1	1.52021	2.50051	0.297355		Lck	6.79649	0.387935	2.9925e-09		Emp3	-8.87575	-0.955064	7.30027e-16		Zfos1	-7.1281	-1.238	4.40533e-10		Jund	10.3762	0.834956	1.95169e-21		Cd53	7.88366	0.658944	1.84775e-12		Socs2	6.51189	1.49576	2.59561e-08		Vasp	11.1988	1.22902	1.73642e-23
Gata1	6.71483	1.18314	3.82761e-10		Dkk3	1.80428	1.25549	0.190397		Nipa1	1.50639	1.03102	0.303148		Tspan32	6.79337	0.41271	2.9925e-09		Tpm3	-8.8712	-0.76359	8.57176e-16		Use1	-7.11167	-0.928153	4.40533e-10		Capg	10.359	1.01351	1.66667e-21		2810474O19Rik	-7.87653	-0.946899	1.89493e-12		Gnb2l1	-6.50559	-0.464509	2.56596e-08		Atp5l	11.1931	1.06062	1.61866e-23
Foxn3	6.61614	0.524444	7.08353e-10		Bank1	1.78816	0.594039	0.195554		Man1c1	1.50506	0.790016	0.303194		Ncoa7	6.79056	1.10804	3.27964e-09		Bst2	-8.86269	-1.62532	1.36339e-15		Cox6b1	-7.09611	-0.55435	5.07961e-10		Gbp7	10.3193	1.17178	3.32007e-21		Tgif1	7.83873	1.64119	2.92897e-12		Mxd4	6.49839	0.773161	2.56596e-08		Cnp	11.1894	1.37951	2.63638e-23
Sgk3	6.61107	1.69702	7.56293e-10		Tnfsf13b	1.78028	0.630472	0.198122		Sned1	1.50132	3.4074	0.304929		Malat1	6.77772	0.308637	3.40362e-09		Eif3k	-8.8516	-0.805837	8.50179e-16		Pcbp2	-7.07936	-0.704324	5.41726e-10		Ets1	10.314	0.786967	3.03999e-21		Crem	7.83718	1.74855	2.9034e-12		Glipr1	6.48627	0.977112	2.78004e-08		Gpi1	11.1517	1.12533	1.84918e-23
Arhgap15	6.59776	0.32974	7.94144e-10		Evl	1.77785	0.128721	0.198768		Tnfsf4	1.50132	3.4074	0.304929		mt-Nd2	6.76284	0.316536	3.61463e-09		Eif3m	-8.8478	-0.829665	8.57176e-16		mt-Nd5	-7.07281	-0.545925	5.41726e-10		Nrp1	10.2866	1.19088	4.57303e-21		Kdm2b	7.79046	1.69097	4.32557e-12		Zfp36l2	-6.43307	-0.749961	3.88594e-08		Sri	11.1469	1.13008	2.72379e-23
Vps37b	6.57975	0.564356	8.92723e-10		Hist1h2bg	1.76996	0.864183	0.201351		Gm15135	1.49752	2.08547	0.306432		Foxn3	6.75151	0.790841	3.86436e-09		Hn1	-8.78944	-0.706903	1.49735e-15		S100a4	7.05381	1.60675	5.65368e-10		Luc7l2	10.2844	0.944072	3.6331e-21		Pgam1	7.78696	1.10197	3.5171e-12		Ly6c1	-6.42756	-7.26551	5.7709e-08		Cyb5a	11.1175	1.26512	4.42101e-23
Il17ra	6.54647	0.65025	1.1006e-09		Nucb2	1.76104	0.392782	0.204111		Padi1	1.49521	1.09661	0.307167		Ctsw	6.74009	1.0254	4.16971e-09		Sh3bgrl3	-8.78725	-0.716127	1.64673e-15		Rac2	-7.04872	-0.476138	6.62478e-10		Eif1	10.279	0.559872	3.49517e-21		Ccr7	-7.76117	-1.9863	5.68885e-12		Rnaset2b	6.42185	0.602202	3.92527e-08		Map1lc3b	11.1158	1.16691	3.16755e-23
Tbc1d1	6.50287	0.509494	1.4368e-09		Prrt1	1.75133	0.470768	0.207343		Dmd	1.49476	0.883838	0.307347		Pnisr	6.72861	0.530316	4.38226e-09		Epsti1	-8.71759	-1.3316	3.54664e-15		Ppia	-7.03954	-0.446869	7.6122e-10		Tsc22d4	10.2263	0.894666	6.08598e-21		Kdm6b	7.7493	1.65335	5.92329e-12		Ssbp2	-6.41542	-1.10222	4.21477e-08		Atox1	11.1062	1.42453	5.67255e-23
Myo6	6.3993	2.70362	2.9476e-09		Mgst2	1.74026	0.151509	0.211044		BC065403	1.49134	1.97444	0.30932		St8sia4	6.72622	0.688195	4.38454e-09		Klhl6	-8.71488	-1.55461	3.08179e-15		Tceb2	-7.03035	-0.499904	7.23578e-10		Iqgap1	10.2019	1.11316	8.85276e-21		Ndfip1	7.74007	0.987223	5.13932e-12		Zcchc18	6.40541	1.33354	4.55656e-08		Pomp	11.0813	1.34912	6.544e-23
Arhgef18	6.33443	0.62685	3.99973e-09		Gm34086	1.73511	1.91845	0.212963		4921508M14Rik	1.49134	1.97444	0.30932		Prrc2c	6.70632	0.50991	5.00823e-09		Atp5e	-8.6675	-0.658103	4.37905e-15		2010107E04Rik	-7.02977	-0.696937	7.28596e-10		Lcp2	10.1718	1.0493	1.03167e-20		Ikzf2	7.72399	0.639096	5.00009e-12		Nsg2	-6.40285	-1.90634	4.75108e-08		Psmb1	11.0796	1.04577	4.42101e-23
Stip1	6.32975	0.438994	4.09547e-09		Specc1	1.68029	0.649767	0.232651		Cd38	1.49004	0.307571	0.309691		Btg2	6.66796	0.56316	6.41962e-09		Sp110	-8.65898	-1.26454	4.33716e-15		Cd3e	-7.01222	-0.545049	7.80257e-10		St8sia4	10.1705	1.18771	1.14657e-20		Sh2d2a	7.71784	1.02974	5.95726e-12		Ptger4	6.40217	1.11795	4.55755e-08		Eif3f	11.0726	0.917916	3.16755e-23
5830468F06Rik	6.31656	1.42656	4.57777e-09		C4b	1.67675	2.43303	0.234055		Rhod	1.48525	0.67269	0.312072		mt-Nd5	6.59841	0.428294	9.91423e-09		Klf13	-8.64463	-0.905289	4.37905e-15		Tmem258	-6.9907	-0.685609	9.12366e-10		Nktr	10.1532	1.00602	1.26544e-20		Fam162a	7.6841	1.19074	7.1003e-12		Rasgrp1	6.39544	0.756654	4.55464e-08		Mbd2	11.0688	1.21278	4.18465e-23
Tmem64	6.23187	0.669324	7.40856e-09		Gm5239	1.67673	3.1111	0.234089		Myh10	1.48439	3.82244	0.312667		Pecam1	6.59624	0.927085	1.01777e-08		Hspe1	-8.64386	-1.07933	6.54569e-15		Park7	-6.97508	-0.580682	9.65974e-10		Gimap8	10.1457	1.0952	1.25628e-20		Tagap	7.66921	1.90049	1.1262e-11		Wls	6.34664	0.981563	5.96216e-08		H2-D1	11.033	0.735433	4.99845e-23
Crlf3	6.17932	0.336857	1.00705e-08		Actr3b	1.6766	1.16768	0.234011		Gm8013	1.48351	1.15259	0.31285		Smc6	6.57766	0.683523	1.13675e-08		Stk38	-8.64133	-1.42434	5.43482e-15		H2afz	-6.9611	-0.927893	1.31466e-09		Smpdl3a	10.1365	0.879692	1.23105e-20		Lrp10	7.66478	0.812844	7.6225e-12		Smdt1	6.32042	0.673725	6.80861e-08		Reep5	11.0081	1.45566	1.0627e-22
G0s2	6.14918	3.31569	1.30852e-08		Gm12589	1.66192	2.88871	0.239731		Ccdc112	1.48012	0.863079	0.314525		Zdhhc20	6.5733	0.699726	1.14091e-08		Cct4	-8.60435	-0.900325	6.33236e-15		Ptprcap	-6.95585	-0.501074	1.0975e-09		Hnrnpa2b1	10.1269	0.793256	1.32e-20		Nt5e	7.64266	1.01026	9.82683e-12		Itgb7	6.28637	0.542482	8.19818e-08		Prelid1	10.9705	1.52414	3.56299e-22
Als2cl	6.14766	1.16259	1.24108e-08		Wdr59	1.65495	0.625671	0.241964		Gm26935	1.47584	0.72728	0.3166		Stk38	6.54963	0.711097	1.3096e-08		Atp5g2	-8.58128	-0.730511	7.27194e-15		Atp5d	-6.93495	-0.645271	1.3022e-09		Rac2	10.0997	0.659896	1.47888e-20		Casp4	7.62705	1.51725	1.1666e-11		Clic1	6.25704	0.446863	9.71841e-08		Gm2a	10.9585	1.8983	3.36317e-22
Klf13	6.1244	0.309002	1.39686e-08		Naip5	1.64266	0.444521	0.246671		Abhd4	1.46456	0.559403	0.321629		Btf3	6.5414	0.372017	1.33447e-08		Cnp	-8.57221	-1.03408	7.78289e-15		Gm8730	-6.91778	-1.00382	1.40757e-09		Itgb7	10.0428	0.887603	3.04313e-20		Ctla4	7.59207	1.1707	1.59776e-11		Lrba	6.24959	1.23642	1.06632e-07		Smdt1	10.8861	1.40744	3.42083e-22
Emp3	6.09859	0.291282	1.63167e-08		Gfpt2	1.63839	1.14857	0.248465		Gm17203	1.46226	1.19441	0.322754		Macf1	6.52281	0.644337	1.55782e-08		Psme1	-8.56127	-0.723684	8.80946e-15		2310001H17Rik	-6.90983	-1.32938	1.62347e-09		Crtc3	10.0397	1.10231	3.45481e-20		Dusp2	7.57362	1.13548	1.71291e-11		Ttc39c	6.24712	1.39019	1.08338e-07		Supt4a	10.823	1.07388	3.2879e-22
Ccdc64	5.93278	0.782679	4.23025e-08		Plekha1	1.60775	0.239805	0.260706		Trav1	1.46145	2.4074	0.323274		Ndufa6	6.50486	0.447556	1.66754e-08		Snrpf	-8.51527	-0.852896	1.33426e-14		Cox6c	-6.90059	-0.549808	1.62347e-09		Chd3	10.0316	0.748026	2.97706e-20		Prkar1a	7.54498	0.766271	1.77392e-11		Shisa5	6.23392	0.348825	1.0883e-07		Cdc25b	10.8049	3.59326	7.3496e-21
Gbp2	5.90555	0.693534	4.92584e-08		Gm9725	1.60389	4.28102	0.262344		Arc	1.45799	0.774074	0.324715		Jak1	6.50312	0.45962	1.69249e-08		Gbp3	-8.51312	-1.79924	1.54551e-14		Ndufa13	-6.89402	-0.524066	1.62347e-09		Macf1	10.021	1.0963	4.34348e-20		Ssr2	7.54336	0.947986	1.75526e-11		Cxcr3	6.22435	1.14708	1.22733e-07		Cap1	10.799	1.34589	4.9789e-22
Dgka	5.87448	0.317001	5.82622e-08		Comp	1.60334	1.69606	0.262344		Kdelc2	1.45605	0.964456	0.325323		Gm8369	6.50143	0.586939	1.69249e-08		Chchd2	-8.46386	-0.619404	1.95739e-14		Psme1	-6.88755	-0.565344	1.70177e-09		mt-Co3	9.99222	0.525445	4.49792e-20		Capg	7.54064	0.799864	1.77392e-11		Gm2a	6.20918	0.954472	1.30568e-07		Smpdl3a	10.7911	1.13972	3.56299e-22
Ms4a6b	5.84959	0.210749	6.72489e-08		Zmat4	1.60276	1.2486	0.262523		Ccdc17	1.45516	0.679479	0.32579		Ralbp1	6.49791	0.593471	1.70536e-08		Dgka	-8.45434	-0.976158	1.87743e-14		Gimap1	-6.88421	-0.505454	1.62347e-09		Kmt2e	9.98718	0.943226	5.01006e-20		2310015A10Rik	7.52098	2.19146	2.70985e-11		Sdcbp2	6.15784	1.01486	1.73511e-07		Sepw1	10.7876	0.964074	3.83604e-22
Dnaja1	5.77467	0.269597	1.02225e-07		Gm1647	1.5926	2.21063	0.266638		Vsig10	1.4493	0.412561	0.328548		Atp5g2	6.48772	0.429439	1.79298e-08		Ifngr1	-8.43413	-1.1702	2.13198e-14		Ndufb9	-6.85891	-0.705461	1.99017e-09		Cbl	9.97564	1.10624	5.41855e-20		Ddx21	7.52071	1.02065	1.94613e-11		Pold4	6.1542	0.863018	1.76849e-07		Glud1	10.7821	1.85411	1.23828e-21
Txnip	5.76925	0.254994	1.05382e-07		2020-09-04	1.5832	1.1111	0.270457		Gm20692	1.44773	0.738373	0.32926		Pold4	6.47536	0.725822	1.95871e-08		Rgs1	-8.43232	-1.50442	3.08356e-14		Cct4	-6.85732	-0.684522	2.026e-09		Rock1	9.9584	0.989741	6.49007e-20		Fam65b	-7.51782	-1.30357	2.32991e-11		Tpst2	6.14738	0.764665	1.76849e-07		Epsti1	10.7793	1.74998	2.01712e-21
Gm21994	5.75617	1.51776	1.15535e-07		Peak1os	1.5765	2.69606	0.273048		Snx29	1.44113	0.466293	0.332603		Whsc1l1	6.45191	0.540013	2.26234e-08		Atp5c1	-8.37882	-0.785578	3.2242e-14		Atp5o	-6.84426	-0.708473	2.15244e-09		Rabac1	9.95584	0.679255	5.41855e-20		Pik3ip1	-7.51655	-1.56768	2.35101e-11		Ndufa13	6.14579	0.428421	1.76849e-07		Lcp1	10.7132	1.10063	7.48954e-22
A430078G23Rik	5.69228	0.734287	1.606e-07		Fam83d	1.5765	2.69606	0.273048		Tmem240	1.43995	0.552348	0.333147		Txnip	6.42655	0.455107	2.60391e-08		Atp5b	-8.37441	-0.766798	3.82725e-14		Cotl1	-6.82994	-0.649717	2.34338e-09		Vps54	9.92744	1.42943	1.01074e-19		Il1r2	7.5097	3.60494	3.72211e-11		Rac2	6.10978	0.416556	2.1659e-07		Thy1	10.7054	1.37893	1.21566e-21
Me2	5.69019	0.568797	1.61626e-07		Lzts2	1.57326	0.567736	0.274003		St3gal5	1.43746	0.712013	0.334367		Tspan13	6.40892	0.603579	2.90778e-08		mt-Co2	-8.30916	-0.411725	5.24284e-14		Atp5h	-6.8292	-0.454604	2.35341e-09		AU020206	9.90966	1.39462	1.13927e-19		Hsp90b1	7.48042	0.814117	2.70985e-11		mt-Nd3	-6.10525	-0.425996	2.31256e-07		Shfm1	10.6952	1.05916	1.16836e-21
Gramd3	5.68235	0.742102	1.69386e-07		Snrpn	1.54423	0.988241	0.287171		Mapt	1.43435	1.23747	0.335941		Il6st	6.38954	0.816035	3.27879e-08		Sepw1	-8.30485	-0.634445	5.48842e-14		Lrrc32	-6.82197	-1.69853	2.74873e-09		Ptp4a2	9.9069	0.9167	9.97453e-20		Bzw1	7.46715	0.794139	2.94682e-11		Gpx4	6.0992	0.489235	2.29494e-07		Tbc1d10c	10.6539	1.17788	1.62181e-21
Snrpd3	5.65589	0.361527	1.94629e-07		Herc3	1.54404	0.293428	0.287173		Gm16045	1.43355	2.23747	0.336292		Ucp2	6.38638	0.459972	3.27879e-08		H2-T23	-8.28714	-0.634996	6.23312e-14		Il18r1	6.80656	1.46067	2.67325e-09		Tbc1d10c	9.90436	0.850148	8.65735e-20		Nfkbid	7.43689	2.53848	5.56877e-11		Prr13	6.09464	0.696213	2.32213e-07		Fam65b	10.6181	1.60178	2.90666e-21
Adrb2	5.65156	0.858927	2.00143e-07		Dapk2	1.52493	1.14857	0.295035		Gm13561	1.43355	2.23747	0.336292		Lef1	6.36621	0.659718	3.70126e-08		Arhgef1	-8.28392	-0.61285	6.23312e-14		Cct2	-6.7733	-0.757116	3.39968e-09		Wnk1	9.90064	1.00069	1.09955e-19		Pdia6	7.42544	1.00313	3.81979e-11		Bach2	-6.08831	-2.28446	2.88655e-07		Cox5b	10.6169	1.27798	3.89597e-21
Sptssa	5.63417	0.34487	2.18583e-07		Zfr2	1.52114	0.505377	0.296208		Abhd12b	1.41886	1.82244	0.34322		Pou2f2	6.36384	0.609645	3.74552e-08		Actr3	-8.28341	-0.659275	7.03165e-14		2410015M20Rik	-6.74576	-0.719845	3.77141e-09		Selplg	9.89239	0.854908	1.10523e-19		Spcs1	7.42317	0.803399	3.81979e-11		Spcs2	6.07999	0.446493	2.49783e-07		Arhgdia	10.6007	1.11662	1.9153e-21
Gpd2	5.49306	1.20804	4.69641e-07		Card9	1.51398	1.03895	0.299658		Gm43832	1.41503	21.1325	0.345154		Il6ra	6.36145	0.795864	3.78362e-08		Satb1	-8.27155	-1.73688	9.03886e-14		Snrpd2	-6.74107	-0.737008	4.29842e-09		Leprotl1	9.88209	0.839853	1.26213e-19		TdTomato	7.41246	1.31111	5.10423e-11		Reps1	6.07518	0.950109	2.62616e-07		Iqgap1	10.5859	1.41266	3.21093e-21
Fam78a	5.45778	0.516777	5.59115e-07		Gpr137c	1.50732	1.34242	0.302514		Hsd3b2	1.41503	21.1325	0.345154		Itga6	6.34364	0.702838	4.16291e-08		Smco4	8.24806	1.14254	7.75921e-14		Prkca	-6.73707	-1.01432	4.44407e-09		Celf2	9.88094	0.924421	1.25127e-19		Plk3	7.40753	2.00208	5.1487e-11		Gm5547	6.03735	1.52236	3.43858e-07		Anp32a	10.5829	0.972505	2.56922e-21
Gm37387	5.42374	0.836359	6.64575e-07		4930532G15Rik	1.49511	0.659223	0.307741		Lrrn2	1.41503	21.1325	0.345154		Neurl3	6.34323	0.815009	4.24151e-08		Atp5l	-8.24743	-0.70224	7.75921e-14		Cst7	-6.71041	-1.20716	5.03625e-09		Skap1	9.87407	0.810051	1.59332e-19		Icos	7.39192	1.04108	4.82325e-11		Hsp90ab1	-6.00445	-0.580039	4.27285e-07		Glipr2	10.5777	1.95712	7.39153e-21
Smchd1	5.36786	0.360484	8.78598e-07		Gm12216	1.48537	0.172002	0.312368		1700020N18Rik	1.41503	21.1325	0.345154		Clec2d	6.30721	0.38588	5.12034e-08		Lat	-8.22523	-0.679258	9.32986e-14		Cyth3	-6.70843	-1.46852	5.09804e-09		Rbm25	9.83923	0.827236	1.58481e-19		Ptpn1	7.30133	0.756536	8.63611e-11		mt-Nd1	-5.9805	-0.404851	4.5523e-07		Cd47	10.5558	1.22533	5.36626e-21
Lbp	5.34591	2.22486	1.0066e-06		Gm26850	1.48106	3.28102	0.314157		Fgf11	1.41503	21.1325	0.345154		Pcbp2	6.29986	0.525306	5.46327e-08		Il4ra	-8.18893	-1.58651	1.55556e-13		Eif3d	-6.70223	-0.838006	5.01937e-09		Wls	9.83382	1.37291	1.68446e-19		Tiam1	7.29282	1.08237	9.24243e-11		Npm1	-5.97499	-0.679828	5.08168e-07		Cox6b1	10.5525	1.09023	5.09433e-21
Gm20324	5.26813	0.97168	1.46741e-06		Tuba8	1.48106	3.28102	0.314157		Adamts20	1.41503	21.1325	0.345154		Sesn1	6.29352	0.94871	5.62211e-08		Hint1	-8.18726	-0.771499	1.37207e-13		Atp5b	-6.69933	-0.589933	5.34284e-09		Bcl11b	9.81726	0.783084	1.74932e-19		Jarid2	7.26698	1.28954	1.22984e-10		Dapp1	5.95352	0.946152	5.21196e-07		Gna15	10.5524	3.68366	3.90849e-20
Dapk1	5.22936	3.14823	1.83482e-06		4930465M20Rik	1.48106	3.28102	0.314157		Gm29100	1.41503	21.1325	0.345154		Map4k4	6.27711	0.715663	6.14919e-08		Actn1	-8.1771	-2.49744	2.17361e-13		Cd52	-6.6966	-0.577544	5.47775e-09		Cdk2ap2	9.78072	0.718402	2.26647e-19		Gnas	7.23647	0.540294	1.26496e-10		Tspo	5.95179	0.529379	5.07864e-07		Glrx	10.5198	2.08115	1.20002e-20
Acp5	5.18321	0.331377	2.22193e-06		Fam213a	1.45867	0.441922	0.324088		Gm14377	1.41503	21.1325	0.345154		Ypel3	6.27101	0.438138	6.20505e-08		Tbca	-8.11215	-0.760203	2.17361e-13		Ndufb5	-6.68201	-0.705281	5.40836e-09		Il2rb	9.77734	1.17066	2.95528e-19		H3f3a	7.23469	0.454409	1.26496e-10		Tmbim6	5.93623	0.462545	5.43112e-07		Psmd8	10.508	1.28373	4.75297e-21
Gm8730	5.18098	0.339196	2.24134e-06		Ighg3	1.45389	0.722055	0.326255		Gm19708	1.41503	21.1325	0.345154		Gltp	6.25359	0.555268	6.95402e-08		Rasgrp2	-8.09304	-2.06827	3.6342e-13		Nsg2	-6.66778	-1.66307	6.56573e-09		Gnai2	9.77118	0.776692	2.95528e-19		Cycs	7.23255	0.843704	1.28041e-10		Rnaset2a	5.91287	0.531672	6.18714e-07		Ahnak	10.4807	2.01564	1.95011e-20
Hnrnpf	5.16528	0.168791	2.42328e-06		Dnajc6	1.45082	1.40655	0.327924		Cyp2u1	1.4136	1.06345	0.345626		Nxpe3	6.25058	0.636458	6.98618e-08		Traf3ip3	-8.08862	-0.821574	2.5635e-13		Ifi27	-6.64478	-0.807365	6.79812e-09		Atp6v0e	9.76276	0.752804	2.48795e-19		Hsp90ab1	7.22734	0.634625	1.35649e-10		Eef1g	-5.91269	-0.548247	6.58243e-07		Hnrnpk	10.3824	0.936155	9.25215e-21
Tmsb4x	5.15057	0.142094	2.63948e-06		Lrp12	1.44607	1.04398	0.330144		Cacna1d	1.41035	0.992362	0.347452		Gm26740	6.22593	0.504775	8.06197e-08		2010107E04Rik	-8.07593	-0.828792	2.89488e-13		Il2rb	-6.63268	-0.9767	7.45885e-09		Pak2	9.76039	0.853791	2.92816e-19		Ctsb	7.16537	0.909976	2.18415e-10		S100a6	5.9048	1.57409	6.58243e-07		Capg	10.3771	1.45965	2.72413e-20
Usp18	5.1335	0.774144	2.82051e-06		Bcam	1.44519	0.469784	0.330539		Gm26615	1.40713	0.516191	0.348496		Il2ra	6.21778	0.698294	8.3669e-08		mt-Co3	-8.0532	-0.390662	3.25809e-13		Ptpn18	-6.63141	-0.391648	7.28452e-09		Ubc	9.75752	0.674635	2.68666e-19		Nab2	7.15157	1.6538	2.60754e-10		AI504432	5.90164	0.970427	6.63486e-07		Tnfaip8l2	10.3155	1.32859	2.63801e-20
Stx1a	5.12955	0.969797	2.88775e-06		Gm16069	1.4392	1.22213	0.333426		Tmem30b	1.40213	1.60004	0.351148		Pik3cd	6.21288	0.750381	8.69342e-08		Sp100	-8.04846	-0.786481	3.53808e-13		Sumo2	-6.61958	-0.515186	8.0522e-09		Fam129a	9.75499	1.52965	3.68651e-19		Itgav	7.14591	1.38773	2.45669e-10		Cdk2ap2	5.89993	0.462657	6.58243e-07		Uqcrh	10.285	0.808789	1.66169e-20
Npm3	5.12643	0.390788	2.91759e-06		Wdr60	1.43896	1.07457	0.333506		Chad	1.39348	2.82244	0.355369		Elk4	6.20204	0.743842	9.20789e-08		Cct2	-8.03319	-0.908692	4.48402e-13		Slc25a5	-6.59866	-0.712786	9.63028e-09		Camk2d	9.75241	1.06258	3.38011e-19		Cct3	7.14485	0.733055	2.29126e-10		Marcks	5.89343	3.39236	8.44476e-07		Hnrnpf	10.2696	0.825864	2.48577e-20
Gm19705	5.11405	1.19576	3.12483e-06		Gm17552	1.43681	0.630769	0.334512		Btk	1.39348	2.82244	0.355369		Filip1l	6.19759	1.05052	9.54021e-08		Treml2	-8.03221	-3.38988	6.27486e-13		Ccnd3	-6.59136	-0.744424	9.09684e-09		Tln1	9.73546	0.908359	3.523e-19		Ube2n	7.14314	0.814701	2.41051e-10		Cdkn2c	5.85743	1.56719	8.59234e-07		Itm2b	10.2683	1.09525	1.12654e-19
Dnajb1	5.1097	0.39225	3.16965e-06		Lhfpl1	1.43278	0.970235	0.336804		Gm37756	1.39348	2.82244	0.355369		Npm1	6.19737	0.46448	9.30441e-08		Cct5	-8.02935	-0.917159	4.55716e-13		Pnrc1	-6.586	-0.5555	9.119e-09		Vamp8	9.72595	0.880673	3.523e-19		Lilrb4a	7.12891	2.30721	3.311e-10		Tmem160	5.85726	0.681382	8.21969e-07		Rac1	10.2653	1.12891	3.37736e-20
Gm9889	5.08494	2.31173	3.65136e-06		B230118H07Rik	1.424	0.835463	0.340943		Gm26581	1.39348	2.82244	0.355369		Trim12a	6.19322	0.601795	9.52282e-08		Cnn2	-8.0246	-0.669783	4.05503e-13		Actn1	-6.56305	-1.74282	1.21232e-08		Apobec3	9.68799	0.831726	5.17532e-19		Arpc4	7.12713	0.712616	2.58084e-10		Slc9a3r1	5.83755	0.552173	9.03103e-07		Tsc22d4	10.2641	1.09518	2.68408e-20
Fdps	5.07376	0.678451	3.76049e-06		Mdfic	1.41702	0.152769	0.343781		4930553M12Rik	1.39348	2.82244	0.355369		Tmsb4x	6.12075	0.283259	1.4416e-07		Ift80	-8.01463	-1.26581	4.96198e-13		Ndufa1	-6.55424	-0.661368	1.1705e-08		Dad1	9.68479	0.704811	4.72361e-19		Lck	7.12677	0.457536	2.54889e-10		Ptms	5.80389	0.972748	1.12967e-06		Pyhin1	10.2401	1.6157	7.72958e-20
Eef2	5.04589	0.182454	4.30699e-06		Klkb1	1.41497	21.0224	0.344244		Abca1	1.39319	0.43012	0.355369		Ndrg3	6.10911	0.910767	1.57574e-07		Pik3ip1	-8.00188	-1.61935	5.23098e-13		Spcs1	-6.54624	-0.832197	1.21232e-08		Tspan32	9.6809	0.728022	6.19104e-19		Shisa5	7.11315	0.403977	2.71543e-10		C1qbp	-5.78425	-1.22963	1.37775e-06		Gpx1	10.1954	1.42365	7.16973e-20
Anapc5	5.00966	0.384796	5.08048e-06		Pnmal1	1.41497	21.0224	0.344244		Plod2	1.38642	0.840585	0.358735		Pbx2	6.10636	0.903462	1.59017e-07		Snrpg	-7.98405	-0.670964	5.23098e-13		Emg1	-6.53332	-0.643174	1.26967e-08		Trp53i11	9.66051	1.33963	8.02991e-19		Selplg	-7.10018	-0.756762	2.93322e-10		Cd3d	5.76822	0.34898	1.32055e-06		Spn	10.188	1.73877	1.55345e-19
Klhl6	4.99793	0.373339	5.37931e-06		RP23-16L19.5	1.41497	21.0224	0.344244		Gm26533	1.38566	1.03394	0.359116		Rere	6.10533	0.916957	1.59257e-07		Gpr18	-7.91775	-2.22272	1.1285e-12		Mmd	-6.52696	-2.11416	1.65684e-08		Cdc42se2	9.65981	0.891573	7.00149e-19		Agfg1	7.09136	0.974443	3.48919e-10		Gpr55	5.76643	1.91287	1.4676e-06		Vamp8	10.1761	1.19504	7.16548e-20
Ldlr	4.98695	1.35237	5.72038e-06		Cdk15	1.41497	21.0224	0.344244		Slc36a4	1.38493	0.600045	0.359328		Mrpl30	6.10171	0.543801	1.59017e-07		Sec61b	-7.90979	-0.707649	9.59801e-13		Akap13	-6.51295	-0.576375	1.45596e-08		Hsp90b1	9.65666	0.998435	6.89378e-19		S1pr1	-7.07855	-1.58907	4.00355e-10		Sh2d1a	5.75034	0.658006	1.44179e-06		Acot7	10.1669	2.06863	1.31569e-19
Pik3r5	4.9851	0.876679	5.74295e-06		Dnajb7	1.41497	21.0224	0.344244		Gm15856	1.37508	0.93262	0.364269		Chd2	6.10157	0.623685	1.59923e-07		Fam65b	-7.88211	-1.31913	1.20536e-12		Ypel3	-6.50859	-0.576727	1.45799e-08		Tmem50a	9.6437	0.750008	6.93384e-19		Ier2	7.05601	1.02715	4.252e-10		Cd74	5.73454	1.03947	1.56296e-06		Rhoa	10.1644	0.914429	6.15645e-20
Fkbp4	4.9564	0.304231	6.54942e-06		Lrrc72	1.41497	21.0224	0.344244		Arhgap5	1.37396	0.217661	0.364728		Churc1	6.09408	0.599021	1.65777e-07		Rhoh	-7.88163	-0.581187	1.08597e-12		Ndufa2	-6.49801	-0.563484	1.5477e-08		Clic1	9.6283	0.707162	8.00139e-19		Bhlhe40	7.04001	2.86161	6.81185e-10		Mat2a	-5.73268	-0.943578	1.61477e-06		Hsd11b1	10.1624	1.88265	1.36031e-19
Bcl9l	4.89757	0.614046	8.6472e-06		Neurl1a	1.41497	21.0224	0.344244		Gm3667	1.37125	0.507564	0.366023		Usp3	6.08057	0.689331	1.77364e-07		Larp1	-7.87894	-1.52794	1.31789e-12		Cd27	-6.47056	-0.476944	1.83303e-08		Atrx	9.61667	1.01888	1.03883e-18		Rheb	7.0131	0.853336	5.52066e-10		Sepp1	5.73223	0.853895	1.57478e-06		Lamtor5	10.1142	1.47962	1.56235e-19
Usp3	4.7466	0.368085	1.72969e-05		Gm17382	1.41497	21.0224	0.344244		Gm5148	1.36957	1.23747	0.366848		Use1	6.0796	0.573572	1.77364e-07		H2-D1	-7.87677	-0.370353	1.28573e-12		Atp5a1	-6.4572	-0.586012	2.04763e-08		Ppp1r12a	9.61534	1.05749	1.00795e-18		Uqcr10	7.00261	0.794277	5.91561e-10		Ikzf2	5.73197	0.501536	1.56296e-06		Ubl5	10.1043	1.0117	1.14146e-19
Eno1	4.73507	0.278973	1.81835e-05		Mgat4c	1.41497	21.0224	0.344244		Tmem45a	1.36467	1.50051	0.369178		S100a4	-6.06578	-3.29761	2.32531e-07		Anxa6	-7.87633	-1.12346	1.32557e-12		Hn1	-6.45177	-0.51645	2.03005e-08		AI467606	9.60419	1.03146	1.08763e-18		Oaz1	6.99869	0.492076	5.73635e-10		Ckb	5.72794	1.58382	1.70481e-06		Cd53	10.1037	0.969215	8.75924e-20
Grap2	4.71917	0.496056	1.95724e-05		A630076J17Rik	1.41497	21.0224	0.344244		Klf8	1.35425	1.36301	0.374616		Srgn	-6.06369	-0.660389	2.01333e-07		Cox7c	-7.83065	-0.609139	1.67601e-12		Hint1	-6.44324	-0.578469	2.24875e-08		Itm2c	9.60155	0.926955	9.81348e-19		Foxp4	6.96776	1.41847	7.95566e-10		Foxp1	-5.72789	-0.772843	1.65001e-06		Ets1	10.1034	0.995146	1.31199e-19
Cacybp	4.68718	0.29874	2.24965e-05		Chrna1	1.41497	21.0224	0.344244		Gm37083	1.34969	2.01508	0.377102		Gm10076	6.05765	0.646219	2.01333e-07		Ptma	-7.82432	-0.671965	2.43705e-12		Ptms	-6.40727	-1.32637	2.8957e-08		Dnajc8	9.59962	0.936106	1.05122e-18		Ppib	6.96504	0.589528	7.24386e-10		Ms4a4c	-5.72604	-4.30374	2.01769e-06		Sh3bgrl	10.0959	1.66677	1.78473e-19
Scml4	4.66762	0.577744	2.45417e-05		9130230L23Rik	1.41497	21.0224	0.344244		Gprc5b	1.34415	0.868241	0.380312		Rab3ip	6.04591	0.965809	2.15061e-07		Gm10076	-7.79066	-1.20701	2.15769e-12		Eif4a1	-6.40609	-0.704397	2.95146e-08		H2-T22	9.56815	0.853354	1.4684e-18		Atp5g1	6.96379	0.767676	7.01739e-10		Trp53inp1	5.72543	0.756039	1.61477e-06		Gapdh	10.077	1.32777	2.71137e-19
Ablim1	4.66734	0.237912	2.45597e-05		Pax3	1.41497	21.0224	0.344244		Ccdc122	1.34216	0.804515	0.381476		Prkcq	6.02287	0.570173	2.41968e-07		Mrpl30	-7.7891	-1.0065	2.15769e-12		Nrip1	-6.39947	-1.002	2.87455e-08		Cd3d	9.56447	0.594463	1.25709e-18		Selk	6.96217	0.596246	7.09818e-10		S100a10	5.72539	0.644995	1.61477e-06		Ldha	10.0667	1.27692	1.73545e-19
Sqle	4.57358	1.05014	3.72303e-05		4921511C10Rik	1.41067	1.21063	0.346019		Ffar1	1.3416	2.82244	0.381717		Inpp4b	6.02042	0.494346	2.42316e-07		mt-Nd4	-7.78352	-0.406142	2.15769e-12		Igf2r	-6.39497	-1.38864	2.95146e-08		Calm2	9.56039	0.761767	1.38969e-18		Klhdc2	6.94608	1.28044	8.58709e-10		Fkbp4	-5.72007	-0.803892	1.69139e-06		Ucp2	10.0291	1.02972	1.58413e-19
Mfhas1	4.5453	0.633956	4.19096e-05		Trbv20	1.40515	0.876633	0.348686		Triqk	1.3416	2.82244	0.381717		Zmynd8	6.0098	0.685217	2.5893e-07		Ier5l	7.7674	3.09396	3.69057e-12		Uqcrq	-6.39149	-0.705863	2.97151e-08		Il2rg	9.55209	0.881174	1.67571e-18		Odc1	6.94396	1.58705	9.60152e-10		Snx20	5.71711	0.753324	1.65001e-06		Fkbp1a	9.98601	1.20787	3.04955e-19
Ppp2r5a	4.50442	0.317713	4.98271e-05		Nedd4	1.4041	0.460612	0.349181		Sema4c	1.34141	1.50051	0.381717		Epcam	-6.00966	-1.51819	2.75034e-07		Psmb9	-7.76389	-0.71186	2.53072e-12		Gdi2	-6.39098	-0.690094	2.91565e-08		Mycbp2	9.54856	0.872896	1.58411e-18		Icam1	6.93397	1.74286	1.02892e-09		Calm3	5.70389	0.692474	1.73717e-06		Ptprcap	9.98039	0.848459	2.13535e-19
Pydc3	4.4234	0.560478	7.00524e-05		Zcchc18	1.40006	0.218273	0.351251		Gm3739	1.34108	0.354288	0.381768		2810474O19Rik	5.99267	0.499079	2.80922e-07		Akap13	-7.75699	-0.690793	2.68142e-12		Dad1	-6.38142	-0.487408	3.07969e-08		Tapbp	9.53198	0.907623	1.94592e-18		Psma4	6.93198	0.737224	8.66281e-10		Ech1	5.6953	0.696332	1.81943e-06		Samhd1	9.96259	1.22694	5.77627e-19
Mrpl30	4.40872	0.26781	7.44856e-05		St8sia1	1.39893	0.315994	0.351889		Nr3c2	1.34017	0.628059	0.382269		Trbc1	5.98126	0.60531	2.98396e-07		Fbl	-7.74725	-1.18542	3.37322e-12		Psma3	-6.3791	-0.552566	3.06104e-08		AI504432	9.5296	1.46779	2.46478e-18		Gapdh	6.9181	0.693007	9.51505e-10		Arnt2	5.694	2.50475	2.05671e-06		Ppdpf	9.95955	1.30583	3.26472e-19
Gm19261	4.40782	1.70895	7.55096e-05		Agpat9	1.38879	1.02621	0.356896		Hist4h4	1.32836	0.388616	0.388807		Ets1	5.97997	0.401981	2.98927e-07		Vim	-7.74437	-1.77618	4.54666e-12		2020-09-07	-6.3683	-0.67363	3.24534e-08		Arid4a	9.52501	0.982184	1.96829e-18		Sumo1	6.91786	0.545064	9.07609e-10		Pglyrp1	5.66861	0.751483	2.05671e-06		mt-Co1	9.95577	0.636555	2.14982e-19
Ada	4.35979	1.14118	9.20485e-05		Gm28933	1.387	2.1111	0.357857		Pms1	1.32749	0.375637	0.389218		Zcchc11	5.97973	0.561843	2.98927e-07		mt-Co1	-7.74424	-0.410774	2.68142e-12		mt-Nd3	-6.36786	-0.396989	3.24816e-08		Hmha1	9.52324	0.669912	1.94592e-18		Nucb1	6.91535	0.985431	9.65632e-10		H2-T23	5.63179	0.404134	2.5026e-06		Hmha1	9.92971	0.839368	3.21825e-19
Nsa2	4.28852	0.196428	0.000122948		Gm16045	1.387	2.1111	0.357857		Bbs12	1.32533	0.62604	0.390484		Cytip	5.97729	0.443072	2.98927e-07		Pdcd4	-7.73558	-0.742016	2.89891e-12		Psmb1	-6.36549	-0.507603	3.22036e-08		H2-Q4	9.51492	0.84479	1.94592e-18		Tceb2	6.90024	0.502269	1.02892e-09		Nmb	5.62761	1.00981	2.63398e-06		Slamf6	9.92615	1.35271	3.69734e-19
Gm2000	4.27424	0.50813	0.000130401		Gm21738	1.38398	1.82159	0.359025		Hoxb3	1.32259	0.538983	0.391767		Ttc3	5.95862	0.885307	3.40993e-07		Ikzf1	-7.73091	-1.03643	3.166e-12		Bcl2a1b	-6.3653	-1.44824	3.84817e-08		Tnfrsf1b	9.50069	1.4701	2.85731e-18		Pglyrp1	6.89891	0.901265	1.02892e-09		Hsp90aa1	-5.60343	-0.734586	3.1518e-06		Cdc42se1	9.90887	1.40453	5.17971e-19
Ifngr2	4.24513	0.582794	0.000146906		Gm42500	1.36919	0.69606	0.366348		Crtam	1.32205	1.75205	0.392214		Cd96	5.95068	0.789115	3.54944e-07		Grap	-7.71741	-0.908116	3.62581e-12		Tmsb10	-6.36339	-0.35536	3.38039e-08		Cxcr3	9.49594	1.47843	2.48797e-18		Vmp1	6.89142	0.840115	1.06388e-09		Ubl5	5.58669	0.426652	3.15831e-06		Selk	9.90469	1.07282	5.17971e-19
Ly6k	4.24466	1.08782	0.000147465		Gm20463	1.36464	2.69606	0.368735		Syngr1	1.31289	2.01508	0.397494		Ahcyl2	5.94442	0.675041	3.61911e-07		Tkt	-7.71513	-1.21257	3.99314e-12		Atp5g1	-6.36317	-0.799234	3.64979e-08		Arhgef1	9.48939	0.683841	2.54861e-18		Pebp1	6.89113	0.665407	1.04845e-09		Tuba1b	-5.58159	-1.26753	3.8728e-06		Ccdc12	9.90091	1.23263	6.77668e-19
Acss2	4.23409	0.752124	0.000153411		Gm13293	1.36464	2.69606	0.368735		Gm27206	1.31245	1.01508	0.397651		Chchd10	5.93894	0.931604	3.78248e-07		Eif4a1	-7.71193	-0.865371	4.43572e-12		Cox7b	-6.35265	-0.600482	3.48588e-08		Ptpn18	9.4773	0.575456	2.63117e-18		Crlf2	6.88843	0.904588	1.15869e-09		Rapsn	5.56721	2.24826	3.95783e-06		Tkt	9.88889	1.61359	1.17907e-18
Tmem71	4.23258	0.466662	0.000154078		Gm16146	1.36464	2.69606	0.368735		Zfp85	1.30469	0.467342	0.402187		Cox4i1	5.92379	0.346353	3.9783e-07		Cct7	-7.68998	-0.850557	4.20335e-12		Ubb	-6.34924	-0.345038	3.53426e-08		Sla	9.47674	1.2628	3.37684e-18		Traf1	6.84543	0.836186	1.53402e-09		mt-Nd4	-5.56437	-0.32058	3.64119e-06		Klhl6	9.86239	1.60513	1.28341e-18
Taf4b	4.20634	1.18179	0.000171772		9530036M11Rik	1.36464	2.69606	0.368735		Plk2	1.29426	1.29888	0.406997		Peli1	5.921	0.434263	4.04128e-07		Timp2	7.68653	1.08971	3.8067e-12		Cct5	-6.34173	-0.694107	3.84476e-08		Lck	9.47522	0.633549	2.84793e-18		N4bp1	6.84392	1.23202	1.56544e-09		Impdh2	-5.55719	-1.23529	4.00397e-06		Cytip	9.84921	1.08104	8.32467e-19
Ahsa1	4.20147	0.246251	0.000174516		Ctsf	1.3642	0.556509	0.368807		Gm9776	1.29149	0.947968	0.408694		Cd47	5.90977	0.429009	4.25868e-07		Pfdn5	-7.68576	-0.49185	3.8067e-12		Tbca	-6.33604	-0.575291	3.74872e-08		Ly6a	9.46726	1.20073	2.98931e-18		Ptpn22	6.83256	0.783688	1.54523e-09		Gng2	5.54708	0.883886	3.93649e-06		Taldo1	9.84779	1.26155	1.36646e-18
Enpp4	4.20139	0.787253	0.000174737		Stat4	1.36347	0.145939	0.36904		Gm42495	1.2906	2.4074	0.408976		Apbb1ip	5.90355	0.476405	4.45071e-07		Rbm3	-7.68156	-0.770825	4.96517e-12		Ftl1	-6.32987	-0.436286	3.9868e-08		Srgn	9.46143	0.957186	2.63117e-18		Eif4a1	6.8296	0.676085	1.53402e-09		Lgals1	5.54516	1.09658	3.90496e-06		Cox7c	9.83847	0.906419	6.72384e-19
Gm10020	4.16748	0.585085	0.000200124		4930598F16Rik	1.36217	1.06379	0.36904		1700011I03Rik	1.2906	2.4074	0.408976		Zbtb20	5.88767	0.719489	4.85487e-07		Ndufa6	-7.68133	-0.716257	3.99314e-12		Pebp1	-6.32109	-0.677405	4.26884e-08		Srsf5	9.45927	0.740017	2.93663e-18		Fxyd5	6.82799	0.498602	1.58286e-09		Fbl	-5.5205	-0.870155	4.71393e-06		Cmtm7	9.83839	1.66655	2.15043e-18
Gm10076	4.12008	0.274801	0.000241879		Armc7	1.35057	0.186715	0.374558		Fzd7	1.2906	2.4074	0.408976		AW112010	-5.88094	-0.440667	5.13912e-07		Whsc1l1	-7.65856	-0.806249	5.10532e-12		Ctla4	-6.31025	-1.01073	4.82567e-08		Pglyrp1	9.45683	1.19046	3.24339e-18		Ptger2	6.81322	1.50619	1.95175e-09		Spcs1	5.51678	0.654306	4.54751e-06		Tpm4	9.82968	1.53326	1.52901e-18
A230046K03Rik	4.10594	0.458656	0.000255678		Gm26765	1.34712	1.47367	0.376287		Gm26835	1.2906	2.4074	0.408976		Rassf5	5.85765	0.514872	5.70425e-07		mt-Nd2	-7.65078	-0.381736	5.17659e-12		Gabarap	-6.30978	-0.504403	4.2613e-08		Dock2	9.44475	0.899358	3.40984e-18		Tmem256	6.80015	1.04451	1.94314e-09		Plgrkt	5.50712	0.605779	4.67483e-06		S1pr1	9.82071	1.74488	1.46162e-18
Vipr1	4.10477	1.89846	0.000258413		Dpp4	1.34668	0.174944	0.376462		Tln2	1.2906	2.4074	0.408976		Neb	-5.85761	-2.32809	6.23011e-07		Snrpd3	-7.64284	-1.07525	6.20963e-12		Camk2d	-6.29573	-0.795277	4.82038e-08		Tpr	9.43692	0.959089	4.50244e-18		Nrn1	6.79792	1.88368	2.25055e-09		Tmsb10	-5.49803	-0.345835	5.02218e-06		Atp5h	9.80708	0.822472	8.73563e-19
Ezr	4.10468	0.252385	0.000256599		Slc35d1	1.34429	0.320551	0.377801		Chic1	1.29058	0.344904	0.408976		Ppm1m	5.84443	0.728995	6.15466e-07		Lrrc32	-7.63611	-2.02066	7.43129e-12		Uqcr10	-6.27824	-0.738925	5.45106e-08		Myl12b	9.40295	0.673121	4.69767e-18		Slc41a1	6.79212	1.85299	2.46496e-09		Fxyd5	5.45567	0.354153	6.11126e-06		Nt5c	9.79286	1.10812	1.11178e-18
Smc6	4.08916	0.269106	0.000272183		Baiap3	1.34333	0.391726	0.37824		Cst7	1.28874	0.13585	0.409893		Rasgrp1	5.83869	0.578433	6.23011e-07		N6amt2	-7.60954	-1.43958	7.49147e-12		Polr1d	-6.26768	-0.615762	5.56515e-08		Pdia3	9.39959	0.820837	4.76513e-18		Zfp36l2	-6.79184	-0.778205	1.95007e-09		Ctsa	5.45458	0.908586	6.16375e-06		Atp5c1	9.78591	1.09051	1.60681e-18
Lpp	4.0405	0.747136	0.000328509		Gm28053	1.33732	0.736702	0.381389		Vegfc	1.28798	1.17858	0.41031		Zfp36l2	5.82844	0.484359	6.63971e-07		Nsg2	-7.592	-2.06136	9.16427e-12		Gm10076	-6.26582	-0.912611	5.56358e-08		Tceb2	9.39669	0.6246	4.43753e-18		Sfpq	6.75261	0.677696	2.51262e-09		Malt1	5.44604	1.25245	6.6431e-06		Myo1f	9.78249	2.67133	4.1288e-18
Acvr1c	4.0149	3.14823	0.000367479		Dip2c	1.33225	0.69606	0.384419		Nagk	1.28753	0.288459	0.410549		Tnrc6b	5.82606	0.541223	6.7699e-07		Cyba	-7.58864	-0.653946	8.05273e-12		Plgrkt	-6.25465	-0.787119	5.89443e-08		Mcl1	9.38549	0.680454	5.10755e-18		Lbh	6.73658	0.652377	2.75009e-09		Selplg	5.43072	0.465264	6.82843e-06		Ms4a6b	9.76945	0.849498	1.2234e-18
Rtn4rl1	4.00419	1.0599	0.000377885		Zfp689	1.33199	0.584552	0.384504		Gm14286	1.28403	0.848432	0.412324		Arl5a	-5.8153	-1.2223	7.62804e-07		Sec61g	-7.58296	-0.650162	8.02902e-12		Cd83	-6.24566	-2.28062	7.50882e-08		Bptf	9.38501	0.871431	5.60845e-18		Glipr1	6.73383	1.03489	2.98548e-09		Cd52	5.42368	0.464459	7.0468e-06		Rora	9.76891	2.25769	3.29676e-18
B430306N03Rik	3.99412	1.73516	0.000393948		Gpr34	1.32892	0.229015	0.386207		Maneal	1.2805	1.23747	0.413623		Cmah	5.80885	1.21163	7.60304e-07		Ikzf2	7.57789	0.557333	7.65605e-12		Cox7a2	-6.23784	-0.568503	6.33443e-08		Psenen	9.38419	0.800938	5.60302e-18		Uqcrb	6.70746	0.606949	3.28043e-09		Myl6	5.4089	0.393303	7.59648e-06		Dok2	9.74334	1.62678	2.72175e-18
Ptp4a3	3.97546	0.293861	0.000419772		Gm10709	1.3138	1.1725	0.393653		Ankrd23	1.2805	1.23747	0.413623		S100a6	-5.7793	-2.66905	9.89668e-07		Smad7	-7.56007	-1.05362	9.81441e-12		Cct7	-6.23701	-0.661521	6.58274e-08		Gabarap	9.37743	0.709114	5.71584e-18		Gramd1b	6.70719	1.1926	3.47561e-09		Rexo2	-5.40527	-0.830834	7.96888e-06		Trbc2	9.72306	0.882072	2.16731e-18
Itga6	3.96218	0.298395	0.000441552		Gm26698	1.31093	0.605458	0.394816		Cnrip1	1.27943	0.314643	0.414134		Inpp5f	5.77501	0.895996	9.00472e-07		Adgre5	-7.55505	-1.17111	9.8661e-12		Itgb1	6.2366	1.02744	6.22686e-08		Prkar1a	9.37145	0.880366	5.71584e-18		Jund	6.70057	0.569825	3.53339e-09		Tgfbr1	5.40257	1.05454	8.26212e-06		Ppp1r18	9.71075	1.11041	2.24436e-18
Nuak2	3.95931	1.38702	0.000447765		Chst15	1.29728	0.374132	0.400736		Gm14718	1.27918	0.734974	0.414295		Son	5.77277	0.342477	8.97354e-07		Tox2	7.54695	1.79454	1.11359e-11		Mrpl23	-6.23087	-0.794772	6.70916e-08		mt-Nd4	9.34693	0.52022	7.45373e-18		Stk17b	6.67901	0.661829	3.86401e-09		Atp6v0e	5.4017	0.444802	7.84781e-06		Stk17b	9.68892	1.07996	1.94143e-18
Tle1	3.93882	0.901594	0.000482283		Dcst1	1.2972	1.88871	0.400783		Gm3500	1.2791	1.5594	0.41435		Gata1	5.77107	1.52039	9.31074e-07		Calm1	-7.54321	-0.585981	1.15983e-11		Atp5f1	-6.23053	-0.553464	6.75649e-08		Zfp292	9.34352	1.00165	8.45992e-18		Myl12a	6.67649	0.557057	3.85649e-09		Chst2	5.39432	1.28535	8.36447e-06		Atp5f1	9.68468	1.06862	3.11075e-18
Actr10	3.93862	0.255663	0.000482105		1700041G16Rik	1.29329	0.959095	0.402635		BC100451	1.27514	1.60004	0.416683		Rbbp6	5.76816	0.590246	9.13195e-07		Dnajc15	-7.50051	-1.25137	1.61753e-11		Cops6	-6.19973	-0.922539	8.01067e-08		Gnas	9.33262	0.690577	7.8741e-18		Psmb5	6.66446	0.657035	4.15141e-09		Lat	5.3881	0.431379	8.33827e-06		Atp2b1	9.66475	1.50637	5.48407e-18
Ankrd44	3.91931	0.220532	0.000517409		Pianp	1.28828	0.888705	0.405456		Dio2	1.27081	3.82244	0.417914		Zcchc7	5.76227	0.573642	9.31074e-07		Add3	-7.49696	-1.37408	1.55615e-11		Sh2d1a	-6.19901	-0.81613	8.16039e-08		Mndal	9.3326	0.868973	8.57352e-18		Ly6c1	-6.66333	-5.12235	6.49702e-09		Il12rb1	5.3857	1.43436	8.63415e-06		Ptpn18	9.66275	0.672705	2.01473e-18
Col11a2	3.91902	1.45434	0.000519644		0610043K17Rik	1.28815	0.946039	0.405456		Gm13274	1.27081	3.82244	0.417914		2610204G07Rik	5.75641	1.50281	9.87442e-07		Gpx1	-7.49167	-1.03263	1.61753e-11		Tnfrsf9	-6.19246	-2.27973	1.0097e-07		Cish	9.31476	1.42071	1.30861e-17		Ppp1r11	6.64956	0.712467	4.6307e-09		2010111I01Rik	5.3766	0.743662	8.77615e-06		Tmem160	9.64999	1.37492	4.08572e-18
Dag1	3.90889	0.847839	0.000538734		Tmem38a	1.28815	0.946039	0.405456		Chrng	1.27081	3.82244	0.417914		Atrx	5.7524	0.537692	9.78323e-07		Arl4c	-7.49162	-1.32683	1.66059e-11		Snx3	-6.17275	-0.610629	8.95736e-08		Lamtor4	9.30572	0.95872	1.10904e-17		Nfil3	6.64063	2.01789	5.81442e-09		Hspa9	-5.37374	-1.13746	9.43389e-06		Slc9a3r1	9.63438	1.08442	3.58638e-18
Tcrg-C1	3.90573	2.60075	0.000551963		Abi3	1.28779	0.201186	0.40563		Trav6-1	1.27081	3.82244	0.417914		Pik3r1	5.75228	0.595573	9.78323e-07		4930523C07Rik	-7.48677	-0.805063	1.52472e-11		Smdt1	-6.1715	-0.723527	9.33039e-08		Tapbpl	9.29544	1.12625	1.15539e-17		Sla	6.63609	0.889048	5.09119e-09		Trp53i11	5.36238	0.80668	9.43389e-06		Snx2	9.60211	1.73494	1.11289e-17
Myc	3.89823	0.575762	0.000560339		2010005H15Rik	1.28501	1.01799	0.407212		Ppp1r26	1.27081	3.82244	0.417914		Ttc14	5.74112	0.468432	1.01802e-06		Zfos1	-7.47669	-1.33356	1.79054e-11		Man1a	-6.1649	-1.05875	9.54696e-08		Kif21b	9.2925	1.0282	1.11463e-17		H2-D1	6.60047	0.342363	6.10351e-09		Ahr	5.35634	1.3066	1.00427e-05		Fis1	9.5896	1.04188	4.17231e-18
Mbnl3	3.89013	0.801359	0.000577223		Prok1	1.28093	1.37413	0.409464		Skint8	1.27081	3.82244	0.417914		Nod1	5.7222	1.43512	1.1657e-06		Cd52	-7.4727	-0.720552	1.63537e-11		Igf1r	-6.15922	-1.22648	1.00264e-07		Ankrd12	9.28602	0.868942	1.27476e-17		Prkch	6.59604	0.793835	6.4482e-09		Gpatch4	-5.35478	-2.0181	1.07576e-05		Ywhae	9.56423	1.25419	8.60601e-18
Itgb3	3.88993	1.00501	0.000577807		Saraf	1.27437	0.0756722	0.413295		Pmepa1os	1.27081	3.82244	0.417914		Kxd1	5.72159	0.642913	1.12348e-06		Ifit1bl1	-7.46009	-2.22477	2.42117e-11		Arl6ip1	-6.15895	-0.50725	9.54696e-08		Arpc2	9.28008	0.684789	1.27476e-17		Larp1b	6.59173	1.20687	6.95243e-09		Ccr9	5.30638	2.19013	1.39222e-05		Fam107b	9.54593	1.34423	1.11289e-17
Eef1d	3.87904	0.147542	0.000601587		Extl1	1.26843	0.973594	0.416412		Gm17535	1.27081	3.82244	0.417914		Eef1g	5.72144	0.383248	1.12348e-06		Msn	-7.44515	-0.677843	2.05387e-11		Usmg5	-6.15767	-0.698683	9.76521e-08		Tpst2	9.27849	1.1017	1.35433e-17		Snx3	6.56211	0.601324	7.80415e-09		Ccdc12	5.30388	0.529012	1.24787e-05		Eef2	9.54427	0.892044	8.22283e-18
Gm9844	3.87376	0.406739	0.000611992		Abcc10	1.26525	0.594522	0.418391		Ube2d2b	1.27081	3.82244	0.417914		Pnrc1	5.72086	0.378507	1.12348e-06		Arl6ip1	-7.44105	-0.594277	2.10807e-11		Psma7	-6.153	-0.597797	1.01494e-07		Selk	9.26619	0.773963	1.30861e-17		Gng5	6.56047	0.467061	7.80415e-09		Actn1	-5.29506	-1.48613	1.38696e-05		Tma7	9.52723	0.966192	1.18355e-17
Sidt1	3.87161	0.518183	0.000616901		Sytl4	1.26474	1.58058	0.418806		Slc27a5	1.27081	3.82244	0.417914		H2-Oa	5.70015	1.26561	1.30272e-06		Grap2	-7.43581	-2.06881	2.61612e-11		Minos1	-6.14378	-0.695284	1.03902e-07		Hn1	9.25586	0.70178	1.48734e-17		Ndufb7	6.55104	0.606421	8.35867e-09		Adam19	5.27991	0.989232	1.42744e-05		Fmnl1	9.50299	1.27194	1.12349e-17
Larp1	3.86959	0.318341	0.000620242		Pcdhga6	1.26245	1.69606	0.420149		Iqck	1.27081	3.82244	0.417914		Atp5c1	5.69712	0.397024	1.26634e-06		Crip1	-7.4142	-1.65989	3.96738e-11		Tnfrsf4	-6.13356	-1.3592	1.36491e-07		Ubl5	9.25485	0.711274	1.42441e-17		Fyn	6.54192	0.675788	8.71195e-09		Lxn	5.27885	1.21758	1.42744e-05		Tomm22	9.49967	1.11909	1.10792e-17
Hsph1	3.8657	0.343863	0.0006289		Mprip	1.25938	0.165823	0.421547		Fcrl5	1.27081	3.82244	0.417914		Wdr82	5.68348	0.700232	1.37407e-06		Gbp7	-7.40882	-1.00801	2.82693e-11		Serbp1	-6.13253	-0.549591	1.1871e-07		Txnip	9.20955	0.76653	2.30328e-17		Nab1	6.54138	1.13229	9.05547e-09		Cst3	5.27292	0.585021	1.43187e-05		AI467606	9.48903	1.28281	1.41397e-17
Drc1	3.85614	2.7774	0.000657987		Prss39	1.25811	3.69606	0.421859		0610031O16Rik	1.27081	3.82244	0.417914		Bach2	5.6779	1.01297	1.42056e-06		Tomm7	-7.40187	-0.615635	2.65283e-11		Cox8a	-6.1263	-0.469602	1.18427e-07		Sdc4	9.19504	1.63724	3.17532e-17		Tmed10	6.53483	0.749648	9.05547e-09		Aven	-5.27122	-1.35891	1.52157e-05		Atp5j2	9.47405	0.906984	1.38395e-17
Wdr89	3.83672	0.212732	0.000697854		Gm26536	1.25811	3.69606	0.421859		Gm16059	1.27081	3.82244	0.417914		Nisch	5.67464	0.533753	1.42056e-06		Hsp90ab1	-7.39993	-0.646214	3.21506e-11		Foxp1	-6.11619	-0.810514	1.1871e-07		Ifi27	9.18993	0.922054	2.54137e-17		Syngr2	6.52945	0.953281	9.525e-09		Abracl	5.26624	0.483935	1.47377e-05		Ywhaz	9.46246	1.21834	1.86574e-17
Ikzf1	3.81916	0.238709	0.000742844		Rrh	1.25811	3.69606	0.421859		4930565N06Rik	1.27081	3.82244	0.417914		Fam65b	5.64886	0.604287	1.62939e-06		mt-Nd1	-7.39577	-0.443239	2.93871e-11		Mllt3	-6.11353	-1.02126	1.24816e-07		Dock10	9.18901	1.0153	3.25492e-17		Ephx1	6.5289	0.941414	9.42572e-09		Prkcq	-5.25929	-0.713468	1.55624e-05		Ndufa13	9.46024	0.930184	1.66888e-17
Kcnmb4	3.80454	1.4175	0.000787548		Gm16181	1.25811	3.69606	0.421859		Olfr172	1.27081	3.82244	0.417914		Ipcef1	5.64744	0.551993	1.64065e-06		Wdr89	-7.38845	-0.85102	2.89447e-11		Trbc2	-6.10382	-0.430622	1.27238e-07		Srrm1	9.18645	0.956308	2.65883e-17		Psme1	6.52774	0.543492	9.42572e-09		Prkar1a	5.22939	0.505374	1.75954e-05		Sh2d1a	9.42965	1.36929	2.53397e-17
St8sia1	3.79959	0.653241	0.00079798		RP23-89C10.2	1.25811	3.69606	0.421859		Gm14322	1.27081	3.82244	0.417914		Gltscr2	5.63375	0.424771	1.75504e-06		Clta	-7.38016	-0.595339	3.09906e-11		Ndufa6	-6.10062	-0.549934	1.27863e-07		Inpp4b	9.18284	0.868573	2.7917e-17		Hnrnpa2b1	6.5222	0.539092	9.61319e-09		Arhgap15	-5.22485	-0.579578	1.82914e-05		Pkp3	9.4295	1.43998	2.68252e-17
Mat2a	3.79912	0.261101	0.000799408		Adora3	1.25811	3.69606	0.421859		Flt1	1.27081	3.82244	0.417914		Mnat1	5.6132	1.03244	1.9973e-06		Znrf1	-7.35882	-1.07326	3.57415e-11		Gm42418	-6.07922	-0.329008	1.4906e-07		Cyba	9.18192	0.720267	2.54137e-17		Egr1	6.51878	2.54345	1.2454e-08		Cpd	5.22242	1.66072	1.91158e-05		Pglyrp1	9.42588	1.61216	3.40693e-17
Adcy6	3.77596	2.89044	0.000874837		E130116L18Rik	1.25811	3.69606	0.421859		Pcdhgb2	1.27081	3.82244	0.417914		Samhd1	5.60874	0.412278	1.9973e-06		Jak1	-7.35046	-0.654151	3.57525e-11		Pacsin1	-6.07633	-1.28769	1.53098e-07		9930111J21Rik2	9.18136	0.990739	3.19829e-17		Slc3a2	6.51402	0.793152	1.00719e-08		Ypel3	5.21911	0.446725	1.84535e-05		Rasgrp2	9.42349	1.8812	3.55433e-17
Dhcr24	3.76977	0.949317	0.000886789		Gm20468	1.25398	2.28102	0.424045		Gm16222	1.27081	3.82244	0.417914		Sp100	5.59798	0.423869	2.12197e-06		Myl12b	-7.34379	-0.527425	4.0292e-11		Hnrnpk	-6.07434	-0.470851	1.49697e-07		Trip12	9.17734	1.11866	2.97059e-17		Atp5j	6.49609	0.530864	1.11564e-08		Fam174a	5.20835	0.897474	1.95715e-05		AY036118	9.40363	0.96551	2.08114e-17
Crip1	3.76792	0.332702	0.00089494		Slc26a10	1.25398	2.28102	0.424045		Ifitm1	1.27081	3.82244	0.417914		St8sia1	5.59091	1.4352	2.29454e-06		Eif3g	-7.33812	-0.897719	4.21329e-11		Ndufc2	-6.05725	-0.738571	1.69176e-07		Fryl	9.17184	1.12128	3.25492e-17		Ybx3	6.49168	1.1306	1.17577e-08		Arl4c	5.20223	0.766358	2.01429e-05		Psen2	9.38744	1.35965	2.87846e-17
G430095P16Rik	3.76469	0.66072	0.000902105		Hoxb2	1.25398	2.28102	0.424045		Col17a1	1.27081	3.82244	0.417914		Mycbp2	5.58391	0.465198	2.29454e-06		Rac2	-7.33373	-0.498555	4.22586e-11		Ndufa4	-6.05635	-0.49846	1.69888e-07		Mier1	9.17079	0.97649	3.39735e-17		Cox8a	6.47829	0.494474	1.22105e-08		Cct3	-5.17057	-0.664042	2.4308e-05		Tmbim6	9.36855	0.94184	2.62065e-17
Fam69a	3.76448	0.379708	0.000902105		Gm26718	1.25398	2.28102	0.424045		Defb6	1.27081	3.82244	0.417914		Ugcg	5.55485	1.0026	2.76613e-06		Evl	-7.31823	-0.880569	4.45454e-11		Hspe1	-6.03883	-0.698625	1.97025e-07		Arhgap30	9.15177	0.926583	3.6048e-17		Psma3	6.45089	0.532359	1.44654e-08		Mfsd10	5.1702	0.999197	2.37262e-05		Gnas	9.33	0.953123	4.83073e-17
Acss1	3.76149	0.779342	0.000911595		Rras	1.2531	0.210951	0.424448		Agpat9	1.26975	0.97444	0.418249		Eif4b	5.54973	0.498352	2.74491e-06		Mrpl23	-7.31044	-0.951273	5.05469e-11		Gng5	-6.03713	-0.432222	1.81404e-07		Sepw1	9.14879	0.663531	3.39623e-17		Abracl	6.44867	0.587404	1.45998e-08		Ubb	5.15977	0.285395	2.4308e-05		AI662270	9.32694	1.77525	7.7291e-17
Hspa8	3.75628	0.149412	0.000930873		Clec11a	1.24895	0.854758	0.426682		Gm16541	1.26845	1.82244	0.41893		Gm20696	5.5386	1.24879	2.94182e-06		Inpp4b	-7.29295	-0.794892	5.36064e-11		Npc2	-6.03398	-0.578194	1.86541e-07		Csnk1a1	9.14583	0.87272	3.79549e-17		Nr4a1	6.4296	3.61153	2.27467e-08		Ppp1ca	5.14262	0.418315	2.64916e-05		Chmp4b	9.32021	1.10908	4.76095e-17
4930523C07Rik	3.7409	0.197823	0.000979589		5930430L01Rik	1.24862	1.02621	0.426753		Gm9830	1.26845	1.82244	0.41893		Cd52	5.53819	0.404203	2.88857e-06		Prrc2c	-7.29249	-0.678548	5.39045e-11		Srp9	-6.03314	-0.553465	1.85661e-07		Cdkn1b	9.13139	0.900576	3.89358e-17		Prdx1	6.42161	0.666797	1.76437e-08		Nop58	-5.13661	-1.1951	2.93932e-05		Jund	9.30016	0.924613	4.80587e-17
Diexf	3.71847	0.70529	0.00106283		Zfp61	1.24749	0.359777	0.427192		Gm3252	1.26666	0.533868	0.419971		Fgl2	-5.52944	-1.41932	3.22335e-06		Cyb5a	-7.28608	-0.712206	5.94832e-11		Slc25a3	-6.02895	-0.5317	1.96645e-07		Saraf	9.09426	0.750066	5.20832e-17		Egr2	6.41631	3.25827	2.37829e-08		Arf5	5.13378	0.405006	2.75707e-05		Atp5a1	9.26784	1.00654	6.07593e-17
Znrf3	3.71349	0.69245	0.00108239		Hpse	1.24353	0.775495	0.428778		Mab21l2	1.26128	4.4074	0.422882		Ikzf1	5.52676	0.549527	3.08733e-06		Tesc	-7.28109	-1.40985	5.99564e-11		Psma4	-6.02056	-0.705728	2.02935e-07		Tonsl	9.09417	0.854493	6.04223e-17		Hnrnpll	6.41373	1.13173	1.96728e-08		Bscl2	5.11775	0.910107	2.99499e-05		Mrps16	9.2571	1.18432	6.82428e-17
Npm1	3.71056	0.185251	0.00109713		P3h3	1.24347	1.1111	0.428778		Ehd3	1.26015	0.256383	0.42319		Zcchc18	-5.50801	-1.34666	3.49096e-06		Atp5o	-7.25827	-0.743807	7.06874e-11		Hnrnpc	-6.01801	-0.679008	2.02639e-07		Serpina3g	9.07648	1.53619	7.6067e-17		Bcl2	-6.40593	-0.9945	1.96119e-08		Vasp	5.11677	0.479245	2.97949e-05		Stk24	9.2554	1.31527	7.1252e-17
Ampd1	3.68105	3.02794	0.00121694		Kctd2	1.24241	0.175413	0.428959		Laptm4b	1.25574	0.484996	0.425958		Myh9	5.50168	0.4618	3.49096e-06		Glipr2	-7.23579	-1.5243	8.98163e-11		Ndufs2	-6.01606	-0.792109	2.02935e-07		Rapgef6	9.07601	0.807784	6.4292e-17		Ctsz	6.399	0.930163	2.06746e-08		H2-K1	5.11512	0.23623	3.00543e-05		Skap1	9.2447	0.811822	5.49201e-17
Gpatch4	3.67823	0.469779	0.00121765		Slc1a3	1.24167	2.37413	0.429402		Cdc42bpg	1.25389	1.03817	0.427139		Gm9493	5.49786	0.641112	3.54002e-06		Pim1	-7.22863	-0.972431	8.74646e-11		Impdh2	-6.01146	-1.20204	2.24761e-07		Aup1	9.06702	1.0847	7.02535e-17		Rasgrp2	-6.39605	-1.57239	2.21355e-08		Arpc1b	5.11171	0.405002	3.01117e-05		Sec11c	9.24394	1.25257	9.9154e-17
Fam105a	3.67256	0.219234	0.00124249		Ascl4	1.24167	2.37413	0.429402		Dnm3	1.25282	1.5594	0.427687		Zkscan3	5.49542	0.750309	3.5905e-06		Lsp1	-7.21608	-0.803397	9.99073e-11		Ikzf4	-6.00877	-0.924825	2.13423e-07		Fmnl1	9.05979	0.994741	7.49039e-17		Ptma	6.39461	0.536973	1.97221e-08		Rora	5.10959	1.04618	3.04844e-05		Scp2	9.20097	0.992712	8.63686e-17
Gm29243	3.66913	1.31663	0.00126057		Mllt4	1.24144	0.554041	0.429402		Ptger2	1.25085	0.208949	0.428708		Ash1l	5.49067	0.554829	3.64278e-06		Sfpq	-7.20976	-0.783137	9.65684e-11		Mrfap1	-5.99834	-0.612858	2.22984e-07		Whsc1l1	9.05212	0.869182	8.06305e-17		Alcam	6.38985	1.91342	2.28185e-08		Atox1	5.10841	0.534935	3.04839e-05		Akr1a1	9.20022	1.13081	9.30772e-17
Clcf1	3.65711	0.558373	0.00131308		Igsf23	1.23819	0.276022	0.43122		Zfat	1.24809	0.660974	0.429018		Twf2	5.48587	0.469384	3.69416e-06		Ube2d2a	-7.20109	-0.773337	9.63286e-11		Arf5	-5.99268	-0.481095	2.24761e-07		Fus	9.04791	0.799859	7.42708e-17		St8sia6	-6.36587	-2.1237	2.79681e-08		Adap1	5.10756	1.32363	3.13351e-05		Tprgl	9.18168	1.10642	1.08647e-16
Gm15675	3.65655	1.35682	0.00131609		Fam49a	1.23557	0.220549	0.432851		Ighg2b	1.24751	2.01508	0.429069		Prkd2	5.48149	0.614707	3.79887e-06		mt-Cytb	-7.17718	-0.367533	1.15513e-10		Eif2s2	-5.98822	-0.661164	2.37113e-07		Stk10	9.04717	1.0951	8.13942e-17		Pomp	6.36484	0.635853	2.37829e-08		Pim1	5.09868	0.596208	3.16763e-05		Ube2b	9.16585	0.970722	1.10064e-16
Aim1	3.65407	0.571958	0.00132519		Ighg1	1.23315	1.91845	0.434375		Kdm4d	1.24375	1.31994	0.431222		Ssbp2	5.4797	0.559921	3.79887e-06		Ly6c1	-7.16382	-28.5094	2.08574e-10		Abracl	-5.97038	-0.586061	2.58326e-07		Sumo1	9.02016	0.724758	9.0164e-17		Lag3	6.36481	2.08374	2.73305e-08		Gnai2	5.09021	0.380499	3.28397e-05		Cd3d	9.1651	0.713778	1.04035e-16
Pik3cd	3.63224	0.289732	0.00143377		Apol10b	1.22881	0.339575	0.43648		Gm13256	1.24375	1.31994	0.431222		Smap1	5.45858	0.52575	4.2908e-06		Iigp1	-7.1386	-1.6149	1.70894e-10		Lsm4	-5.96778	-0.663986	2.59992e-07		Sri	9.02003	0.718718	9.0164e-17		Spcs2	6.35854	0.496893	2.45819e-08		Gnb2	5.08238	0.464697	3.40343e-05		Pdlim2	9.15667	1.3681	1.40583e-16
Hspe1	3.61891	0.203191	0.0015093		Ms4a1	1.22596	1.84806	0.438398		Mtrf1	1.24154	0.521268	0.432599		Ankrd12	5.45639	0.45677	4.31256e-06		Cox5b	-7.13278	-0.684785	1.6181e-10		Snrpg	-5.96451	-0.479103	2.64385e-07		Lat	9.01896	0.682759	9.23282e-17		Eif5a	6.34957	0.710703	2.51922e-08		F2r	5.08085	1.26576	3.52864e-05		Slc25a3	9.14823	0.920184	1.15113e-16
Ccdc53	3.61372	0.307218	0.00153165		Zswim1	1.22522	0.384292	0.438745		Col1a2	1.23479	1.82244	0.436726		Ankrd44	5.45383	0.475595	4.33119e-06		Eif5a	-7.12786	-0.908261	2.16841e-10		Chchd2	-5.94154	-0.426283	3.06428e-07		Arl6ip5	9.01656	0.8507	1.01965e-16		Adss	6.33743	0.820577	2.80054e-08		Vim	5.07308	0.853271	3.55298e-05		Cwc15	9.14554	1.14438	1.59477e-16
Dnah8	3.61072	0.656381	0.00154925		Itgae	1.2243	0.136704	0.439323		Wdr90	1.23306	0.713913	0.437794		Sf3b1	5.45305	0.386791	4.35312e-06		Pcbp1	-7.1277	-0.855999	1.66754e-10		Ddx5	-5.93908	-0.349936	3.02725e-07		Lrrc32	9.01181	1.55778	1.43063e-16		Ptpn6	6.33085	0.871277	2.94048e-08		Ccr4	5.07118	1.42028	3.64221e-05		Add3	9.14351	1.52205	2.05502e-16
Prf1	3.56975	1.52465	0.00179003		Gm5914	1.22037	0.2476	0.441554		Hgf	1.22643	0.796902	0.441841		Tecpr1	5.44699	0.561056	4.4916e-06		Atp5j2	-7.12015	-0.530933	1.70894e-10		Eif5a	-5.937	-0.736355	3.50203e-07		Pnn	9.00979	0.845054	9.66393e-17		Map2k3	6.31939	1.29168	3.1778e-08		Rgs10	5.06696	0.442641	3.62966e-05		Sf3b1	9.13173	0.877161	1.41434e-16
Cers6	3.56689	1.36164	0.00180433		Sap25	1.21314	0.87009	0.445725		4833418N02Rik	1.22301	1.08547	0.443818		Eif2s3y	5.44533	0.634252	4.50156e-06		Zc3hav1	-7.11378	-1.03967	1.74349e-10		Cd2	-5.93643	-0.451599	3.06428e-07		mt-Atp6	8.98505	0.456183	1.29781e-16		Tnfaip8	6.31744	0.726768	3.13123e-08		Lbh	5.06261	0.515107	3.70299e-05		Gpsm3	9.11975	1.1308	2.21525e-16
Mapk11	3.56537	0.611649	0.00180953		Upb1	1.21039	1.69606	0.44748		Sorbs1	1.22162	1.01508	0.444703		Crlf3	5.44114	0.456318	4.54835e-06		Socs2	-7.11155	-3.01067	2.48766e-10		Rabgap1l	-5.92895	-0.751354	3.22892e-07		Rsbn1l	8.98488	0.841659	1.29631e-16		Fam3c	6.30443	0.711953	3.37738e-08		Coro1b	5.04597	0.693072	4.01845e-05		Npc2	9.11621	1.0165	1.87052e-16
Gm10073	3.55078	0.290992	0.00190464		Gm15545	1.21003	0.52021	0.447564		Clstn1	1.21465	0.280383	0.449001		Mrpl52	5.4398	0.415782	4.57692e-06		Bcl11b	-7.0828	-0.615099	2.10981e-10		Nt5e	-5.91434	-0.93299	3.48882e-07		Arhgap31	8.96707	1.06755	1.64835e-16		Ndufb8	6.28471	0.662116	3.72669e-08		Tmem50a	5.04034	0.424739	4.09723e-05		Fau	9.10889	0.566802	1.49534e-16
Gm4955	3.55044	0.361805	0.00190638		Gm17275	1.20489	1.43303	0.450752		Mgmt	1.21262	0.297181	0.450209		Klhl6	5.43664	0.590897	4.61599e-06		Cycs	-7.0602	-1.04137	2.71281e-10		Rrp1	-5.91383	-0.702925	3.46093e-07		N4bp1	8.95232	1.52696	2.13391e-16		Mdh1	6.28291	0.700761	3.96435e-08		Dok1	5.03242	0.842909	4.28243e-05		Arf1	9.0862	0.974869	2.25382e-16
Themis	3.54353	0.665025	0.00195107		Susd4	1.20079	0.532084	0.452836		Spred3	1.21164	1.44393	0.450768		Gm26917	5.43599	0.717416	4.72528e-06		Cox6b1	-7.05881	-0.547718	2.57091e-10		Zfp36l1	-5.89722	-0.878196	3.8551e-07		Kif5b	8.94022	0.910445	1.82071e-16		Prelid2	6.28263	2.04973	4.22039e-08		Srp14	5.02787	0.437842	4.30863e-05		Ndufa1	9.08174	1.11226	3.02401e-16
Bcl2l11	3.53606	0.573979	0.0019998		1700030K09Rik	1.19932	0.566777	0.453594		Gm14019	1.21164	1.44393	0.450768		Ldlrad4	5.42999	0.808079	4.75401e-06		Atp5f1	-7.05626	-0.644218	2.55857e-10		Trp53	-5.88196	-0.745352	4.08718e-07		Syt11	8.94007	1.33493	2.20927e-16		Ssr4	6.27716	0.674971	3.96506e-08		Ppp1r14b	-5.02736	-0.7982	4.50803e-05		Sp100	9.08046	0.974045	2.17014e-16
Tmem261	3.49313	0.320902	0.00230977		Nr1d2	1.19874	0.298725	0.453619		Megf8	1.21164	1.44393	0.450768		Rac2	5.42932	0.311691	4.75401e-06		Srsf3	-7.0501	-0.624176	2.69358e-10		Gpi1	-5.87783	-0.549269	4.13857e-07		Hmgb1	8.93969	0.700332	1.76088e-16		Ptpn7	6.2642	0.78831	4.32064e-08		Dnaja1	-5.02103	-0.512259	4.49822e-05		Twf2	9.06863	1.18633	3.07515e-16
Fam102a	3.47399	0.303982	0.00245921		1700028K03Rik	1.18864	1.47367	0.459392		Ccdc63	1.20927	0.992362	0.452127		Igbp1	5.42703	0.589458	4.79071e-06		Atp5a1	-7.0313	-0.655412	2.96698e-10		B2m	-5.87441	-0.336982	4.25815e-07		Ddx24	8.93785	0.862339	1.82071e-16		Mcm6	6.2619	1.24792	4.43555e-08		Apex1	-5.01784	-2.23216	4.94012e-05		Ndufb7	9.064	0.985354	2.45409e-16
Ly6d	3.42408	3.44522	0.00292069		Adgrd1	1.18818	0.959095	0.459608		Xkr6	1.20672	0.463034	0.453139		Coro1a	5.41844	0.30471	4.98804e-06		Npm3	-7.01908	-1.22154	3.52565e-10		Nol7	-5.87166	-0.611608	4.25815e-07		Ywhaz	8.92417	0.902828	2.14696e-16		Tbc1d4	6.24613	1.17538	4.90664e-08		Igfbp4	-5.01387	-6.15935	5.42036e-05		Ptprc	9.06391	0.743859	2.0242e-16
Serpine2	3.40741	2.25927	0.00306126		BC094916	1.18481	0.20229	0.46159		Six5	1.20655	1.06755	0.453139		Prdm1	-5.41665	-1.8771	5.3506e-06		Eif3a	-6.99827	-0.818669	3.89966e-10		Rbm3	-5.85084	-0.56287	5.08439e-07		Vmp1	8.89842	1.12716	2.85528e-16		Slc5a3	6.23287	1.57936	5.26135e-08		Id2	5.01134	1.37186	4.85214e-05		Prdx1	9.05902	1.24967	4.60281e-16
Gm28809	3.39918	1.25996	0.00313352		RP24-120F8.4	1.18419	1.69606	0.462023		Gm12942	1.20567	0.375921	0.453574		Tmem64	5.41328	0.847982	5.16455e-06		Socs3	-6.99449	-1.53867	3.99008e-10		Psmb8	-5.84719	-0.385594	4.88641e-07		Cox8a	8.8941	0.662898	2.362e-16		Grb2	6.22666	0.621241	5.07264e-08		Myo1f	5.00698	1.26102	4.83721e-05		Anxa5	9.04184	1.63845	5.00156e-16
Cltb	3.38765	0.438702	0.0032501		Kcnk3	1.18419	1.69606	0.462023		Nsun7	1.2053	0.660974	0.453667		Srpk1	5.40995	0.464307	5.18688e-06		Ifi35	-6.9926	-1.16066	3.88978e-10		Mdh2	-5.84698	-0.582949	4.92202e-07		Rinl	8.88667	0.794528	2.72691e-16		Stap1	6.21741	0.961409	5.66827e-08		Atp2b4	5.00625	1.12687	4.85006e-05		Sh3glb1	9.04047	1.04049	2.88002e-16
Glipr2	3.36757	0.299138	0.0034692		C1qtnf4	1.18066	0.270509	0.46325		Fbxo32	1.2048	0.241454	0.453856		Nrp1	5.40361	0.545912	5.3506e-06		Impdh2	-6.98768	-1.46684	4.61861e-10		Uqcrb	-5.84685	-0.553895	4.92202e-07		Arid4b	8.87857	1.15502	3.61177e-16		Eif1ax	6.20083	0.830201	6.02186e-08		Sh3bp5	-4.99208	-1.38765	5.2422e-05		Esd	9.02259	1.18289	4.18179e-16
Gm26551	3.36253	0.624309	0.00352545		Gm26631	1.17826	0.673692	0.463535		Hist1h2bc	1.20166	0.298875	0.45576		Tomm7	5.40299	0.368659	5.3506e-06		Psmb10	-6.98341	-0.69547	3.89966e-10		Tnfrsf18	-5.83383	-0.673902	5.49618e-07		Arhgdia	8.87837	0.756557	2.72691e-16		Ost4	6.1911	0.532554	6.23521e-08		Npm3	-4.97386	-0.884156	5.70255e-05		Psmb3	9.01895	0.996445	3.95377e-16
St3gal6	3.34464	1.2323	0.00373671		Maneal	1.17797	1.1111	0.46361		AI854703	1.20114	0.510851	0.456102		Rora	-5.40255	-1.31865	5.54077e-06		Lfng	-6.97547	-1.15426	4.08936e-10		Son	-5.82574	-0.392089	5.39707e-07		Epcam	8.87631	1.66376	3.45865e-16		Btf3l4	6.19079	0.895562	6.23521e-08		Ehd1	4.97331	1.39306	5.70255e-05		Cox6c	9.01094	0.997221	5.52343e-16
Rap2b	3.34222	0.389409	0.00376118		Gm43597	1.17527	0.775495	0.465223		Rab39b	1.19551	0.564639	0.459653		Sp110	5.3944	0.541366	5.5522e-06		Serf2	-6.96603	-0.457799	4.44593e-10		H2-T23	-5.81825	-0.456518	5.54195e-07		Mtdh	8.87427	0.897763	2.97942e-16		Sec61g	6.17561	0.502294	6.82131e-08		Hnrnpf	-4.96261	-0.339108	5.80437e-05		Srgn	9.00662	1.0376	2.89037e-16
Slc16a5	3.33665	1.87361	0.00383751		4930542C12Rik	1.16985	0.821591	0.468174		Pth1r	1.19223	2.08547	0.461362		Psap	5.38663	0.556134	5.82122e-06		1600014C10Rik	-6.96237	-1.48486	4.96813e-10		Bmyc	-5.81712	-1.0365	6.18089e-07		Gm26740	8.8736	0.801976	2.83262e-16		Rpn1	6.17108	1.04468	7.12597e-08		Pglyrp2	4.96229	0.716223	5.76872e-05		Ablim1	9.00552	1.04234	4.11982e-16
Fbxl22	3.33049	1.13563	0.00389947		Cldn23	1.16858	3.28102	0.468895		Phlda2	1.19223	2.08547	0.461362		Rbm5	5.3839	0.469477	5.82122e-06		Cct8	-6.95237	-0.753279	5.1103e-10		Fam169b	-5.80963	-0.674667	5.82686e-07		Ctla4	8.85435	1.21285	3.97366e-16		Ahi1	6.1633	1.54934	7.90905e-08		mt-Cytb	-4.96184	-0.279098	5.80437e-05		Ubb	8.98843	0.64881	4.02264e-16
A630033H20Rik	3.31425	0.882889	0.00409888		Mettl7a1	1.16339	0.442304	0.471267		Gm2956	1.19223	2.08547	0.461362		Mbnl1	5.3711	0.322283	6.20136e-06		Myl12a	-6.94023	-0.626039	5.22639e-10		Clta	-5.79933	-0.471006	6.18089e-07		Nipbl	8.84835	1.01125	3.90528e-16		Ifit1bl1	-6.1617	-1.73851	8.27695e-08		Eef1b2	-4.95751	-0.386556	5.90165e-05		Ywhab	8.9663	0.99365	4.69094e-16
Banf1	3.31247	0.232354	0.00412182		Gm17399	1.15981	0.833564	0.47369		Mtss1l	1.19223	2.08547	0.461362		Ighm	-5.36729	-0.51486	6.32624e-06		Sumo2	-6.93691	-0.532441	5.51475e-10		Ybx1	-5.79805	-0.582693	6.71251e-07		Atp11b	8.84104	0.974368	4.15546e-16		Ran	6.15126	0.665434	7.67473e-08		Ppan	-4.95387	-1.65493	6.24236e-05		Capza2	8.96472	1.15726	6.86281e-16
Spice1	3.31125	0.819181	0.00413895		Gm26525	1.15427	0.995621	0.477297		Gm11209	1.18967	1.65251	0.461395		Gsta4	5.35072	1.72557	7.18435e-06		Supt4a	-6.93621	-0.606122	5.22316e-10		Spcs2	-5.79074	-0.449567	6.53237e-07		Ggnbp2	8.83887	0.971102	3.97366e-16		Kbtbd11	-6.14672	-0.945842	7.92904e-08		Pon2	4.95291	0.719793	5.92485e-05		Ostf1	8.95009	1.54571	1.19809e-15
Pcsk4	3.30726	0.898456	0.00418549		Hist1h2bl	1.15247	1.19356	0.478212		4933423P22Rik	1.18967	1.65251	0.461395		Rabgap1l	5.33564	0.520309	7.44513e-06		Cox7a2	-6.91451	-0.622013	6.08967e-10		Gm11808	-5.78534	-0.540686	6.66197e-07		Actb	8.83532	0.597292	4.02172e-16		B2m	6.13798	0.386856	8.44525e-08		1810037I17Rik	4.95174	0.490426	5.92485e-05		Actr2	8.9403	1.13284	6.75458e-16
Tgtp1	3.29369	0.699449	0.00435985		Slc25a2	1.14851	1.9591	0.480364		Pou4f1	1.18494	1.23747	0.464378		Lrrc32	5.32693	0.792273	7.78424e-06		Gbp2	-6.90782	-1.97486	8.51597e-10		Btg1	-5.78294	-0.350213	6.62093e-07		Pfn1	8.82872	0.597016	3.86558e-16		Baz1a	6.13366	0.916483	8.75417e-08		Atpif1	4.95129	0.699114	5.92485e-05		Phf11b	8.94018	1.56056	1.03026e-15
Rabac1	3.28509	0.126208	0.00447794		Aldh1a3	1.14851	1.9591	0.480364		Celf4	1.18275	3.4074	0.466062		Acin1	5.30545	0.480714	8.69221e-06		Cox6c	-6.9078	-0.564554	6.43628e-10		Paip2	-5.77045	-0.566044	7.1522e-07		Ptbp3	8.81941	0.85909	4.67111e-16		Capzb	6.13116	0.580586	8.6773e-08		B4galnt1	-4.94575	-0.638545	6.12124e-05		Slc25a4	8.92902	1.39397	9.79856e-16
Ppia	3.27865	0.11006	0.00457725		Nxf2	1.14851	1.9591	0.480364		Cyp4f13	1.18189	0.298875	0.466347		Myo1f	-5.29048	-1.83638	9.65818e-06		Gm4951	-6.90768	-3.77502	9.11747e-10		Ankrd12	-5.76635	-0.584243	7.37235e-07		Nt5e	8.80519	1.05741	4.76714e-16		Psmb6	6.12149	0.602406	9.11779e-08		1110008P14Rik	4.94079	0.774052	6.23593e-05		Ndufb11	8.9277	1.02406	9.18982e-16
Hid1	3.277	1.7332	0.00459748		Ddx20	1.14339	0.2702	0.482693		Lrrc8e	1.17939	1.68493	0.467872		Rprd2	5.27647	0.693524	1.00572e-05		Pecam1	-6.8712	-1.53391	8.67386e-10		Ndufs8	-5.75382	-0.922492	7.96508e-07		2020-09-09	8.79496	0.948284	5.94252e-16		Spint2	6.12062	0.803453	9.2679e-08		Il27ra	4.92079	0.636994	6.78056e-05		2700060E02Rik	8.91874	1.03032	7.73075e-16
Igtp	3.27028	0.23358	0.00468049		Fgl2	1.1412	0.179133	0.484168		Kiz	1.17751	0.301321	0.468717		Bin1	5.2654	0.58963	1.06803e-05		Casp8	-6.86769	-0.908985	8.19379e-10		Rest	-5.75165	-1.02848	8.01179e-07		Akna	8.79271	0.936188	5.75503e-16		Arpc1b	6.1168	0.505177	9.26905e-08		2020-09-09	4.92036	0.522442	6.76363e-05		mt-Co2	8.9163	0.586217	6.62578e-16
H2-Ob	3.26495	0.476119	0.00475415		Trav9-4	1.13658	1.38794	0.487166		Kcnj13	1.17723	0.947968	0.468888		Rcn1	5.2629	0.81557	1.07905e-05		Prkcq	-6.86344	-0.870427	8.41209e-10		Trmt112	-5.74792	-0.637033	7.98028e-07		mt-Cytb	8.79236	0.488763	5.39251e-16		Cst3	6.11299	0.677631	9.51288e-08		mt-Nd5	-4.91121	-0.41554	7.08693e-05		Mpc1	8.90511	1.35083	9.26621e-16
N6amt2	3.2629	0.268082	0.00478304		Hdac9	1.13466	0.604138	0.487609		Ccdc18	1.17451	1.30786	0.470531		1700025G04Rik	5.25699	1.51981	1.13615e-05		Atp5d	-6.84922	-0.628331	9.3493e-10		Snrpd1	-5.74074	-0.893997	8.74461e-07		Atp2b4	8.78472	1.73308	7.23105e-16		Atp5e	6.08861	0.489796	1.11239e-07		Gabarap	4.88892	0.369808	7.80361e-05		Serinc3	8.88716	1.09177	1.09261e-15
Srm	3.24411	0.484913	0.0050661		Rtkn	1.13315	1.31755	0.488142		Efemp2	1.17417	1.10623	0.470724		mt-Nd3	5.24174	0.310011	1.19846e-05		Anapc5	-6.80991	-1.15723	1.22301e-09		Ran	-5.73067	-0.700803	9.6018e-07		Tmem59	8.76652	0.805811	7.01262e-16		Cd200r1	6.08709	1.42124	1.16872e-07		Myc	-4.88789	-2.17996	8.74551e-05		Tln1	8.88647	1.05686	9.83623e-16
Epb41l4aos	3.22229	0.289811	0.00541933		Gm11508	1.13315	1.31755	0.488142		Arl10	1.15776	0.330041	0.480861		Gramd1a	5.2373	0.660265	1.21993e-05		Ahcyl2	-6.80475	-1.09648	1.23849e-09		Mrps6	-5.7285	-1.2988	9.43618e-07		Phc3	8.76228	1.10474	7.24425e-16		Tpi1	6.08227	1.1693	1.16872e-07		Susd3	4.88755	1.09262	8.04467e-05		Ppp2ca	8.87265	1.1143	1.25294e-15
Amigo2	3.20065	1.38573	0.00580522		Megf8	1.13315	1.31755	0.488142		Ccdc15	1.15743	0.448979	0.481076		Rexo2	5.22867	0.547431	1.26651e-05		Pyhin1	-6.80377	-1.01939	1.31093e-09		Cd81	-5.72776	-1.30766	9.90114e-07		Rsrc2	8.76114	0.838916	6.79959e-16		Atp5d	6.07523	0.541969	1.17205e-07		mt-Atp6	-4.87069	-0.24482	8.56568e-05		Adrbk1	8.86165	1.17012	1.39305e-15
Art4	3.19439	1.33598	0.00592259		Cxcr3	1.1329	0.149801	0.488237		Gpr45	1.1539	0.564639	0.483155		Phf20l1	5.22752	0.626475	1.27277e-05		Arl5c	-6.78601	-1.12844	1.42216e-09		Mrpl30	-5.72344	-0.720593	9.09644e-07		Clk1	8.75263	0.876196	7.58631e-16		Itgal	6.07203	0.703488	1.18881e-07		Slc43a2	4.86912	1.07543	8.70629e-05		Pkm	8.85523	1.23128	1.57837e-15
Hmgn1	3.18597	0.23488	0.00606583		Tpcn1	1.13171	0.154401	0.488838		Slc12a2	1.15311	0.33701	0.483521		Git2	5.21827	0.514673	1.32507e-05		Hprt	-6.77865	-0.921039	1.44722e-09		Itm2b	-5.7136	-0.384908	9.54832e-07		Aes	8.75016	0.563021	7.24425e-16		Pkm	6.0578	0.666564	1.30045e-07		Pqlc3	4.8514	1.13931	9.43131e-05		Srpk1	8.84726	1.13454	1.46519e-15
Sbk1	3.18595	0.710829	0.00606583		Gm26759	1.13142	0.332312	0.489017		B230217O12Rik	1.14804	0.822437	0.486666		Hn1	5.21791	0.338253	1.32358e-05		Nop56	-6.77198	-1.29075	1.68208e-09		Ltb	-5.71354	-0.418936	9.54832e-07		Prrc2b	8.7501	1.14487	8.37332e-16		Chchd2	6.05724	0.467336	1.30045e-07		Cd6	4.84621	0.603633	9.527e-05		Tmem71	8.84541	1.93195	2.14141e-15
Ager	3.18339	1.20338	0.00612306		Hist1h2bf	1.13132	1.008	0.489068		Gm16998	1.14579	1.01508	0.487859		Atp1b3	5.20614	0.446995	1.39472e-05		Uqcrfs1	-6.77173	-0.987116	1.49102e-09		Coro1a	-5.70846	-0.358168	1.0098e-06		Rap1a	8.74918	0.771087	7.24425e-16		Il2rg	6.05649	0.58138	1.30973e-07		Lag3	4.84028	1.99861	0.00010636		Zyx	8.84294	1.94087	2.60921e-15
Nedd4l	3.18104	0.966904	0.00616378		Ighd	1.13104	0.261123	0.4892		Pcgf2	1.14444	0.367871	0.488635		Card6	5.19782	0.842489	1.47624e-05		Txk	-6.76668	-1.72348	1.72769e-09		Csnk1a1	-5.70405	-0.585636	1.00842e-06		Map1lc3b	8.73948	0.753008	7.90328e-16		Sumo2	6.03998	0.463395	1.40273e-07		Pnp	4.83981	0.71411	9.68405e-05		Atp5d	8.83758	0.914291	1.15006e-15
Fbxo17	3.16804	0.756536	0.00641072		Zfp3	1.12815	0.448133	0.491341		Gm26767	1.14417	0.858963	0.488752		Tsc22d3	5.19214	0.553957	1.49683e-05		Eno1	-6.75706	-0.823892	1.62055e-09		Emc10	-5.69854	-0.84281	1.03161e-06		Glrx	8.7372	1.29532	7.79692e-16		Lcp2	6.03578	0.659391	1.45573e-07		Rasgrp2	-4.82779	-1.13587	0.00010636		Tpm3	8.83737	0.896265	1.29921e-15
BC005561	3.16295	0.438623	0.00650486		Gm4799	1.12784	0.79794	0.491541		Myo1h	1.14191	0.627421	0.48996		mt-Nd1	5.17802	0.289694	1.61027e-05		Rcn1	-6.74893	-1.70782	1.92523e-09		Eif3i	-5.69363	-0.580183	1.08985e-06		Hif1a	8.73259	1.09251	7.84902e-16		Ptger4	6.03486	1.02342	1.49436e-07		Ift80	-4.82147	-0.783584	0.000106661		Saraf	8.83044	0.964426	1.54846e-15
Gm6133	3.15955	0.45726	0.00657924		2810425M01Rik	1.12636	1.52614	0.492189		Hip1r	1.14105	0.206179	0.490403		Pip4k2a	5.16988	0.876049	1.69015e-05		Psmb3	-6.74059	-0.622312	1.79866e-09		Nedd8	-5.68287	-0.526788	1.12047e-06		Bod1l	8.71963	0.951966	9.81719e-16		Cox7c	6.03146	0.454441	1.46163e-07		Gm8369	-4.81325	-0.629353	0.000109967		Dynlrb1	8.82778	1.1192	1.49664e-15
Entpd5	3.15747	0.598278	0.00661685		Gm12932	1.12636	1.52614	0.492189		Ctdspl	1.13852	0.79269	0.492155		Asap1	5.16806	0.657742	1.69118e-05		Lsm4	-6.73808	-0.755604	1.81132e-09		Prrc2c	-5.67514	-0.514639	1.15914e-06		Ccnl1	8.71897	1.01635	9.81024e-16		Anp32e	6.02853	0.798481	1.50863e-07		Syngr2	4.80858	0.73011	0.0001114		Mtch1	8.80336	1.7253	3.56159e-15
Commd8	3.14017	0.277906	0.00697684		Gm10501	1.12636	1.52614	0.492189		Apon	1.13718	2.82244	0.492573		Trpc4ap	5.15642	0.574124	1.77593e-05		Ywhaz	-6.73133	-0.743772	1.93718e-09		Ube2i	-5.67197	-0.521079	1.16704e-06		Zdhhc18	8.69511	1.00302	1.19781e-15		Tnfaip3	6.01873	1.40958	1.68796e-07		Nrp1	-4.79411	-0.708968	0.000119986		Ywhaq	8.796	1.15165	2.29264e-15
Sox4	3.128	1.497	0.00723106		Klk9	1.12636	1.52614	0.492189		Gm26760	1.13718	2.82244	0.492573		Slamf6	5.15629	0.535981	1.77593e-05		Nme1	-6.72251	-1.01317	2.42016e-09		Cybb	-5.67125	-2.04794	1.2883e-06		Dok1	8.69439	1.29988	1.2038e-15		Vsir	6.01807	0.884861	1.69263e-07		Ebp	4.7932	0.59522	0.000118542		Ebp	8.7897	1.74274	5.47189e-15
Sco2	3.1259	0.430068	0.00726984		Anxa9	1.12636	1.52614	0.492189		Gm17669	1.13718	2.82244	0.492573		Ttc39c	-5.15454	-1.45779	1.83394e-05		Ankrd11	-6.68999	-0.680794	2.48682e-09		Ubl5	-5.65753	-0.464698	1.26884e-06		Mdfic	8.6844	1.20542	1.31184e-15		Psma7	5.99679	0.553701	1.77388e-07		Arl6ip5	4.78439	0.46841	0.000123032		Trpv2	8.78768	1.72341	2.48719e-15
Kras	3.09615	0.24561	0.00792532		Syce1	1.12636	1.52614	0.492189		Fam84a	1.13718	2.82244	0.492573		Kcnq1ot1	5.14698	0.573314	1.8573e-05		Capn3	-6.68636	-2.12719	2.85556e-09		Ndufb8	-5.65606	-0.646387	1.2883e-06		Csde1	8.67777	0.91822	1.26121e-15		Ttc39c	5.99545	1.41535	1.93791e-07		Slamf1	4.77153	0.762437	0.000131067		Apbb1ip	8.77472	0.954478	1.86227e-15
Hotairm1	3.08032	2.7332	0.00834525		Hist1h1a	1.12045	0.848063	0.496129		9430018G01Rik	1.13718	2.82244	0.492573		Sp140	5.13948	0.711327	1.91993e-05		Eif3d	-6.67412	-0.839841	2.66533e-09		Rbm38	-5.65295	-0.676996	1.29139e-06		PISD	8.67556	0.955724	1.30956e-15		Bsg	5.99147	0.637376	1.85119e-07		Dkc1	-4.76726	-1.13333	0.000137749		Eif4e2	8.76893	1.40959	2.87784e-15
Parp11	3.07778	0.389405	0.00836935		RP23-172P1.4	1.1137	2.69606	0.497944		Gm5475	1.13718	2.82244	0.492573		Chd4	5.13221	0.516033	1.98457e-05		Aes	-6.67211	-0.432742	2.63417e-09		Zap70	-5.6482	-0.770394	1.35027e-06		Lrrfip1	8.66225	0.939732	1.51849e-15		D8Ertd738e	5.97401	0.543308	2.00026e-07		Ncmap	4.7424	1.02696	0.000152018		Nedd8	8.76	0.984445	2.50539e-15
Trdv2-2	3.06407	3.20482	0.00873336		Ppp1r13l	1.1137	2.69606	0.497944		Alox15	1.13718	2.82244	0.492573		Ube2h	5.12796	0.568177	2.03053e-05		H2-Q7	-6.66605	-0.379729	2.84988e-09		Bola2	-5.64678	-0.670473	1.35027e-06		Top1	8.66199	0.821088	1.45174e-15		Myl6	5.96796	0.475007	2.08991e-07		Pafah1b3	-4.74087	-1.3116	0.000154341		Sdcbp	8.74878	1.36933	3.13786e-15
Ntn4	3.03234	2.22223	0.00957887		Gm26593	1.1137	2.69606	0.497944		Wnt10b	1.13718	2.82244	0.492573		H2afy	5.11571	0.390655	2.13603e-05		Klk8	-6.65523	-0.864565	2.99766e-09		Txn2	-5.64358	-0.748389	1.36478e-06		Sdf4	8.65509	0.837193	1.31012e-15		Actr3	5.9661	0.453311	2.07463e-07		Ddx18	-4.73436	-0.781495	0.000157415		Esyt1	8.74689	1.49663	3.08196e-15
Fbl	3.01827	0.205969	0.00992016		Gm4279	1.1137	2.69606	0.497944		Gm11739	1.13718	2.82244	0.492573		Aff3	5.10833	1.04337	2.23854e-05		Psmb1	-6.65362	-0.539435	2.90698e-09		Tma7	-5.63395	-0.426464	1.40989e-06		Tspo	8.64044	0.760387	1.6365e-15		Gata3	5.95282	0.862352	2.30416e-07		Edem1	4.72518	0.700806	0.000160494		Ccr2	8.73253	3.73566	1.05474e-14
Bst2	3.01636	0.230394	0.00996904		Gm5900	1.1137	2.69606	0.497944		5930430L01Rik	1.13692	0.97444	0.492573		Satb1	5.10816	0.667657	2.22729e-05		Snrpe	-6.65144	-0.610224	3.1172e-09		Cnpy2	-5.61911	-0.854346	1.52451e-06		Ankrd11	8.63917	0.935096	2.31481e-15		Vamp8	5.95262	0.576381	2.26003e-07		Tnfsf8	-4.72476	-1.69672	0.000164655		Wdr1	8.72878	1.18485	3.1851e-15
Ppp1r14b	3.01518	0.209008	0.0100013		2310043O21Rik	1.1137	2.69606	0.497944		Gsta4	1.13568	0.350449	0.493312		Grap2	5.09319	0.789802	2.38333e-05		Fam102a	-6.64907	-1.31476	3.21661e-09		Oaz1	-5.60977	-0.385378	1.62182e-06		Ptk2b	8.63396	1.20809	2.09891e-15		Pla2g16	5.93881	0.649814	2.50228e-07		Srm	-4.71612	-2.35282	0.000180686		Scand1	8.71142	0.899054	3.13786e-15
Dntt	3.01053	3.41127	0.0101884		Gm26877	1.1137	2.69606	0.497944		C78197	1.12816	1.10623	0.495921		Kmt2e	5.09303	0.415413	2.37731e-05		Psme2	-6.64723	-0.67567	3.39107e-09		Evl	-5.59821	-0.632905	1.70271e-06		Tnrc6b	8.63025	0.864529	1.8655e-15		Tmbim6	5.93037	0.507772	2.55893e-07		Slfn1	-4.71387	-0.792667	0.000170288		Xrn2	8.707	1.48846	5.49907e-15
Ctsw	3.00493	0.318384	0.010293		Smco3	1.1137	2.69606	0.497944		Odf2l	1.12706	0.490923	0.496622		Tnfaip8l2	5.09147	0.469261	2.38333e-05		Ankrd44	-6.61853	-0.763232	3.66128e-09		Atp5g3	-5.59715	-0.660404	1.75633e-06		Cd53	8.62974	0.678893	1.76367e-15		Shfm1	5.9299	0.473514	2.551e-07		Ppib	4.71052	0.36269	0.000170288		Mrpl9	8.68501	1.61633	6.11229e-15
Cyth1	3.00348	0.21752	0.0103347		Gm7102	1.1137	2.69606	0.497944		Hes5	1.12541	0.663239	0.497485		Aldh2	5.0885	1.60459	2.48901e-05		Tmem234	-6.61828	-0.701747	3.67902e-09		Fbl	-5.59636	-0.794036	1.7849e-06		Tecr	8.62499	0.816412	1.8655e-15		Rrbp1	5.92922	0.914211	2.62464e-07		Gnl3	-4.70676	-1.54445	0.000180686		Ifi203	8.68485	0.962597	3.56275e-15
Rasl11b	2.99708	0.949881	0.0105287		Csf2	1.1089	1.31755	0.499669		4930524J08Rik	1.12512	0.964456	0.497678		Ythdc1	5.08661	0.485648	2.4422e-05		2410015M20Rik	-6.61727	-0.701458	3.67018e-09		Uba52	-5.58872	-0.516424	1.76885e-06		Upf3b	8.61931	1.05922	2.05532e-15		Nfkbie	5.92783	1.27014	2.69036e-07		Cd3e	4.70581	0.335812	0.000173063		Pdcd6	8.68061	1.07529	3.64489e-15
Idi1	2.99392	0.574387	0.0106134		Csf1	1.10204	0.222129	0.504274		Six3	1.12479	1.68493	0.497846		Tcf20	5.07266	0.830131	2.61515e-05		Arpc5	-6.6165	-0.704928	3.74347e-09		Fam162a	-5.56885	-1.14519	2.08701e-06		Kmt2a	8.61276	0.831574	2.05532e-15		Timm13	5.92563	0.612062	2.6032e-07		Gimap1	4.70306	0.334584	0.00017434		Txndc17	8.67675	1.30693	5.02255e-15
Gm14124	2.98773	2.56327	0.0108409		Slamf7	1.10139	0.428838	0.50474		Ypel4	1.12219	1.04483	0.499397		Arl6ip1	5.06357	0.335104	2.70807e-05		Itgb7	-6.61623	-0.621204	3.80717e-09		Hopx	-5.55807	-0.81103	2.19366e-06		Ythdc1	8.60684	0.905834	2.19561e-15		Sdhaf1	5.92483	0.788965	2.62178e-07		Hsph1	-4.69306	-1.00354	0.000185701		Tecr	8.6761	1.03225	4.15649e-15
Tuba1a	2.98317	0.237131	0.0109417		Edem1	1.09974	0.117821	0.505843		Dnah7a	1.1187	0.399226	0.501551		Utrn	5.04604	0.538636	2.96892e-05		Igf2r	-6.61518	-1.40205	4.05592e-09		Ndufb3	-5.55435	-0.600549	2.12876e-06		Eif4g2	8.6049	0.80926	2.26563e-15		Arpc3	5.92191	0.482666	2.62178e-07		Grap	4.69279	0.517142	0.000182019		Atp5e	8.66836	0.780434	3.69331e-15
Ppp1r13b	2.9809	0.392796	0.0110063		Pmepa1	1.09531	0.117828	0.508568		Dnmt3aos	1.11717	1.31994	0.502694		Pura	5.03529	0.408286	3.12275e-05		Il6ra	-6.61395	-1.29983	3.80811e-09		Ndufb10	-5.55294	-0.606673	2.11702e-06		Serf2	8.58763	0.557808	2.31481e-15		Hcls1	5.92184	0.644317	2.63979e-07		1700025G04Rik	-4.67795	-4.85105	0.000219452		Lrrfip1	8.66453	1.16559	4.96539e-15
Klf16	2.97821	0.557634	0.0110945		Tmem8b	1.08943	0.833564	0.512381		Zfp930	1.11591	0.440567	0.503527		Ncor1	5.01	0.388178	3.53516e-05		Slc25a5	-6.6011	-0.706084	4.42895e-09		Kxd1	-5.54804	-0.893515	2.19366e-06		Junb	8.57664	0.832369	2.56503e-15		Evl	-5.91994	-0.729113	2.64668e-07		Nabp1	4.66849	0.851663	0.000204258		Wdr26	8.66269	1.32347	4.78115e-15
Cd200r3	2.97344	1.71527	0.0112649		Ctnnal1	1.08875	0.941173	0.5127		Zfp108	1.11318	1.50051	0.505198		Phf3	5.00904	0.459334	3.54677e-05		Hnrnpa1	-6.5921	-0.907758	4.60986e-09		Agfg1	-5.53712	-0.860494	2.33703e-06		Hnrnpa0	8.57435	0.612634	2.5752e-15		Cd52	5.91825	0.562033	2.71957e-07		Mettl1	-4.65853	-2.64886	0.000229702		Trac	8.65465	0.831389	4.15649e-15
Mob3b	2.9579	0.858015	0.0117453		Pcdhgc3	1.08591	2.69606	0.514891		Gm4978	1.11318	1.50051	0.505198		Bnip3l	4.98738	0.422235	3.94095e-05		Usp3	-6.59097	-1.08846	4.37735e-09		Hivep3	-5.53565	-2.03144	2.64374e-06		Pfdn5	8.57283	0.526045	2.69062e-15		Hsd17b12	5.91708	1.28218	2.74784e-07		Hpcal1	4.65354	0.793149	0.000218129		Atp6v0e	8.65358	0.887081	4.71835e-15
Slc44a2	2.95154	0.250553	0.0119293		Art4	1.0827	0.586436	0.516765		Tmem26	1.11318	1.50051	0.505198		Bptf	4.97884	0.422962	4.1068e-05		Fam53b	-6.58779	-0.769504	4.39143e-09		Pkm	-5.52822	-0.605817	2.57758e-06		Neb	8.5719	2.11117	3.9517e-15		Erh	5.91284	0.621092	2.70262e-07		Nav2	4.63689	1.28366	0.000238991		Tmem14c	8.65287	1.15355	5.03144e-15
Gm16083	2.94869	5.28574	0.0121163		Zbtb18	1.07289	0.273438	0.522338		4933407L21Rik	1.11318	1.50051	0.505198		Atxn2l	4.97177	0.50062	4.24725e-05		Psma2	-6.58737	-0.596112	4.53393e-09		Esd	-5.51072	-0.646372	2.64374e-06		2020-09-01	8.57113	0.713981	2.85606e-15		Bcl10	5.91256	0.764273	2.73394e-07		Ptma	-4.63292	-0.41905	0.000249957		Eif3k	8.64877	0.858348	4.65225e-15
Oas2	2.9425	1.89342	0.0122811		Gm11454	1.07135	1.1111	0.523309		Il13ra1	1.11082	0.763544	0.506731		Gpsm3	4.96535	0.415088	4.35068e-05		Ms4a4c	-6.58532	-5.59451	6.2528e-09		Eif4b	-5.50988	-0.642263	2.64689e-06		Pura	8.57042	0.78578	2.90313e-15		Ndufa13	5.91111	0.441953	2.71957e-07		Gart	-4.62751	-1.34004	0.000249957		Raly	8.64698	1.04482	5.5685e-15
Igf2r	2.93787	0.278614	0.0124179		Dnd1	1.07084	0.4351	0.523309		Plcl1	1.11014	0.319937	0.507155		Brd8	4.96435	0.58579	4.37606e-05		Gm9493	-6.56351	-1.11729	5.11365e-09		Lamp1	-5.50181	-0.688458	2.74457e-06		Ube2b	8.56546	0.766683	2.9827e-15		2010111I01Rik	5.90791	0.787905	2.77459e-07		Mafg	4.62348	1.07179	0.000249957		Grb2	8.64037	1.1093	5.77241e-15
Mgst3	2.92978	0.966484	0.0127109		Cdh13	1.06944	0.519182	0.524117		Slc30a3	1.1065	2.82244	0.509446		Bclaf1	4.96108	0.478597	4.42577e-05		Rgs10	-6.55384	-0.609477	5.37251e-09		Cox14	-5.49688	-0.668498	2.8174e-06		P2rx7	8.53766	1.15256	3.65652e-15		Ndufa1	5.90607	0.571256	2.80539e-07		Mmp9	4.6141	3.46948	0.000283831		Brk1	8.63297	0.972932	5.64848e-15
Fntb	2.91642	0.657908	0.0131711		Tgtp1	1.06876	0.29679	0.52456		Ephx4	1.10261	0.722902	0.511907		B4galnt1	4.95503	0.450035	4.54009e-05		Rcsd1	-6.55151	-0.843676	5.3169e-09		Ostc	-5.49287	-0.66301	2.87679e-06		Hnrnph1	8.53372	0.974986	3.8502e-15		Atp5g3	5.90331	0.667775	2.85541e-07		Hnrnpa0	-4.61253	-0.368264	0.000260104		Tmem234	8.63255	1.05276	6.1779e-15
Tspan9	2.91464	2.7332	0.0132834		Soat2	1.06536	0.979853	0.525791		Zfp316	1.10197	0.526981	0.512362		Ccr2	-4.95116	-4.33139	5.10594e-05		Ldha	-6.54994	-0.725374	5.81277e-09		Hnrnpa0	-5.48949	-0.40797	2.91715e-06		Gata3	8.5307	1.21835	4.50897e-15		Chst2	5.90145	1.33151	2.94172e-07		Parp3	-4.60121	-1.15949	0.000274758		1110008F13Rik	8.63042	1.19728	6.16076e-15
Snhg12	2.8825	0.264688	0.0144987		Ctrl	1.06536	0.979853	0.525791		Pfn2	1.10067	0.345115	0.513071		Gdi2	4.94783	0.412725	4.68205e-05		Sh3kbp1	-6.54524	-0.822711	5.74651e-09		Inpp4b	-5.48181	-0.587322	3.00509e-06		Oaz1	8.53	0.576363	3.53536e-15		Hiat1	5.90118	0.943275	2.9171e-07		C030034L19Rik	4.59084	2.6849	0.000300851		Cox7a2l	8.62688	0.725994	4.96539e-15
Mettl1	2.87961	0.480694	0.0146113		Kiss1r	1.06311	1.21063	0.527183		Bbc3	1.10005	0.17911	0.513511		Sh3bp5	4.94532	0.782127	4.74937e-05		Emg1	-6.5438	-0.62956	5.68484e-09		Wdr89	-5.46423	-0.59941	3.32077e-06		Ppib	8.52412	0.666499	3.77895e-15		Snrpb	5.89254	0.529814	2.94038e-07		Cacybp	-4.59009	-0.648274	0.000287464		Capns1	8.6121	1.28189	8.35703e-15
Arid3b	2.87332	0.446767	0.0148718		Hist2h3c1	1.06196	0.726434	0.528027		A230005M16Rik	1.09947	1.4074	0.51395		Rasa1	4.94292	0.634706	4.80502e-05		H2-K1	-6.54198	-0.298882	5.89479e-09		G3bp1	-5.46144	-0.625947	3.41332e-06		Fkbp3	8.52391	0.755356	3.83459e-15		Nme1	5.89166	0.738992	2.94172e-07		Trpv2	4.58564	0.870175	0.000289601		Zfand6	8.60967	1.13673	6.92728e-15
Ssh2	2.87275	0.193394	0.0148917		Hist3h2ba	1.05719	0.191793	0.531043		Gm10516	1.09798	1.82244	0.514525		Hp1bp3	4.91407	0.489048	5.50249e-05		Fam69a	-6.53168	-1.58169	6.49859e-09		Luc7l2	-5.45733	-0.564201	3.43204e-06		Cebpb	8.52265	1.27346	4.39345e-15		Mogs	5.88493	0.959535	3.11498e-07		Dhrs7	4.58456	0.716332	0.000289239		Fermt3	8.60965	1.1446	6.9909e-15
Pid1	2.85644	1.40181	0.0155951		Rab11fip2	1.05478	0.133067	0.532814		Ctsk	1.09798	1.82244	0.514525		Ifnar2	4.91177	0.59027	5.54132e-05		Spock2	6.5171	1.74648	7.31416e-09		Mdn1	-5.45287	-1.5629	3.64917e-06		Camk4	8.52094	1.1561	4.27325e-15		Uqcrq	5.88335	0.61158	3.11498e-07		Man2b1	4.57055	0.784221	0.000305371		Ube2l3	8.60694	1.09013	7.0643e-15
Gtf2i	2.8549	0.244006	0.0156388		Gbp4	1.0534	0.109775	0.533671		Apln	1.09798	1.82244	0.514525		Skil	4.90603	0.650398	5.67753e-05		C1qbp	-6.50805	-1.24088	8.06085e-09		Ncl	-5.43595	-0.707052	4.26057e-06		Il10ra	8.51546	1.58881	5.04954e-15		Dnajb11	5.86332	0.78831	3.52324e-07		Mphosph10	-4.56811	-1.02099	0.000313036		Vdac2	8.60273	1.05542	6.76967e-15
Tuba4a	2.85249	0.22839	0.0157328		Trav8d-2	1.04944	2.34814	0.535482		Osbpl6	1.08789	1.31994	0.521219		Samd9l	4.901	0.633966	5.82546e-05		H2-T22	-6.49928	-0.612764	7.33843e-09		Psma5	-5.43213	-0.729622	3.9701e-06		Il16	8.50162	0.746115	4.388e-15		Pon2	5.85977	0.798753	3.56511e-07		P2rx7	4.56534	0.732276	0.000313152		Dazap2	8.58555	1.23426	8.80825e-15
Rnf144a	2.82852	0.895568	0.0167866		Fam129c	1.04891	0.389814	0.535613		Ftsj2	1.08566	0.262675	0.521607		Tes	4.89811	0.509555	5.8785e-05		Eif2s2	-6.49897	-0.718632	7.56354e-09		Psma2	-5.43186	-0.490524	3.95842e-06		Adrbk1	8.49648	0.851967	4.77815e-15		Gabarap	5.85199	0.468961	3.70685e-07		Eif5a	-4.56338	-0.596335	0.000333922		Gdi2	8.58123	1.01792	7.79092e-15
Slc25a23	2.82849	0.715022	0.016787		Lix1	1.04776	1.69606	0.535963		Bcl6	1.08537	0.288205	0.521721		4930523C07Rik	4.89466	0.399543	5.93539e-05		Gm26917	-6.49247	-1.09805	8.44408e-09		Capn3	-5.42204	-1.52906	4.29016e-06		2020-09-07	8.4961	0.787737	4.64555e-15		Adora2a	5.8515	1.09306	3.73046e-07		Atp5l	4.55945	0.353358	0.000316437		Cldnd1	8.57861	1.65662	1.16725e-14
Zcchc24	2.81639	1.46374	0.0173736		2210411M09Rik	1.04776	1.69606	0.535963		Atg14	1.0834	0.335171	0.523124		Smchd1	4.89279	0.517142	5.98875e-05		Ddx5	-6.48241	-0.38121	8.04101e-09		Mrps21	-5.41405	-0.627037	4.26635e-06		Cyb5a	8.47984	0.769164	5.44659e-15		Hnrnpa0	5.85115	0.448079	3.70685e-07		Dtx1	4.5549	0.816571	0.000327263		Stk4	8.57075	1.15946	8.80825e-15
Foxk1	2.81612	0.424718	0.0173699		Asb5	1.04776	1.69606	0.535963		Gm11175	1.08118	1.23747	0.52452		Ski	4.89063	0.54492	6.03568e-05		Tmem50a	-6.47361	-0.562771	8.28726e-09		Sesn3	-5.4066	-0.801157	4.4284e-06		Prkch	8.47891	0.989912	5.69241e-15		9930111J21Rik2	-5.84954	-0.744539	3.73528e-07		Timm10	-4.55383	-1.46376	0.000338148		Ubc	8.56641	0.81967	9.69502e-15
Inadl	2.81338	0.511609	0.0175004		Hoxc8	1.04776	1.69606	0.535963		Amt	1.08118	1.23747	0.52452		Sun2	4.88647	0.527735	6.11829e-05		Pfn1	-6.47094	-0.439623	8.83346e-09		Znrf1	-5.40472	-0.741994	4.44069e-06		Arglu1	8.45622	0.81497	6.58466e-15		Ghitm	5.84764	0.759459	3.80513e-07		Erdr1	-4.55025	-1.14565	0.000339265		Dbi	8.56013	1.42616	1.38453e-14
Cnga1	2.80424	1.61985	0.0179336		Trav14-3	1.04767	1.28102	0.535963		Fgd6	1.08043	0.470965	0.524925		Mndal	4.88158	0.395238	6.24486e-05		Mat2a	-6.46247	-0.939505	9.61749e-09		Itm2c	-5.40097	-0.594384	4.58448e-06		Trbc2	8.4437	0.578075	6.86812e-15		Cd69	5.83906	1.37355	4.52484e-07		Eif4a1	-4.53391	-0.518562	0.000363982		Hmgb2	8.54936	2.50883	3.90861e-14
Ifrd1	2.79922	0.32988	0.018149		Rhox8	1.04594	0.243268	0.537194		Gm44264	1.07807	0.915547	0.52651		Ldb1	4.87632	0.493837	6.40114e-05		Eif2s1	-6.45937	-1.05109	9.78257e-09		Nrn1	-5.39759	-2.75532	5.18662e-06		Hnrnpf	8.43987	0.524049	6.79812e-15		Arf5	5.83464	0.459628	4.00682e-07		Upf3b	4.53384	0.603272	0.00035158		Fli1	8.54728	1.49613	1.22842e-14
Atic	2.78633	0.249121	0.0187817		Pclo	1.04591	2.69606	0.537223		4933411E06Rik	1.07807	0.915547	0.52651		Tet3	4.87232	0.631168	6.5204e-05		Sptssa	-6.44788	-0.79804	1.00556e-08		H2-Oa	-5.3946	-2.18746	5.0887e-06		Rsrp1	8.43516	0.629847	7.61908e-15		AI662270	5.82401	0.887731	4.29047e-07		Phb	-4.5338	-1.13193	0.00035914		Ezr	8.53839	1.14692	1.19765e-14
Rhoq	2.78503	1.22767	0.0188441		4933407L21Rik	1.04495	1.37413	0.537523		Abcc8	1.07262	2.82244	0.530375		Ankrd11	4.87148	0.398043	6.5204e-05		Smc6	-6.43873	-0.8711	1.04991e-08		Pfn1	-5.38741	-0.360962	4.93357e-06		Fam53b	8.43226	0.861325	7.95468e-15		Il21r	5.81963	0.65509	4.36935e-07		Nop10	-4.53308	-0.521707	0.000356708		Mkrn1	8.53604	1.25485	1.3191e-14
Rbms1	2.78297	0.202947	0.0189401		Lactbl1	1.04495	1.37413	0.537523		Dqx1	1.06901	0.652512	0.532711		Aak1	4.86588	0.589761	6.65853e-05		Pdha1	-6.42469	-1.03199	1.12897e-08		Hnrnpf	-5.38259	-0.333139	5.00376e-06		Zcchc11	8.43018	0.864712	7.76319e-15		Mrfap1	5.79917	0.552217	4.84059e-07		Tox2	4.52795	1.29782	0.000363982		Mrpl54	8.52549	1.33674	1.18576e-14
C1qbp	2.77818	0.234734	0.0191937		Slitrk4	1.04495	1.37413	0.537523		BC106179	1.06883	0.467594	0.532795		Cd3d	4.86537	0.264579	6.65853e-05		Ezr	-6.42364	-0.795656	1.13479e-08		Erh	-5.38205	-0.601975	5.18662e-06		Sf3b1	8.42861	0.662933	7.8291e-15		Minos1	5.7863	0.581934	5.18204e-07		Mthfs	4.52669	0.768155	0.000361909		Ywhah	8.51471	1.18806	1.53295e-14
Tcf7l2	2.74828	1.51597	0.0208444		BC065403	1.04495	1.37413	0.537523		2610035D17Rik	1.06862	0.197117	0.532906		Zc3hav1	4.86389	0.487614	6.68378e-05		Il2rg	-6.39382	-0.610143	1.40213e-08		Bach2	-5.37544	-1.59862	5.308e-06		Cab39	8.42839	0.961089	8.24767e-15		AW112010	5.76751	0.507854	5.80174e-07		Cct8	-4.52058	-0.517234	0.000373617		Prdx2	8.50771	1.03689	1.35655e-14
Utp14a	2.73555	0.299326	0.0215393		Polq	1.04495	1.37413	0.537523		Prr22	1.06515	1.44393	0.533178		Rsrp1	4.85413	0.322434	7.00511e-05		Park7	-6.39175	-0.532173	1.35015e-08		Plekha1	-5.37441	-1.42398	5.24335e-06		Tax1bp1	8.42226	0.881311	9.44292e-15		Tmem258	5.75315	0.538231	6.27456e-07		Saraf	4.51697	0.398353	0.000372026		Csk	8.50567	0.995698	1.38453e-14
Gm28935	2.73335	1.48527	0.0216937		4921508M14Rik	1.04495	1.37413	0.537523		Igflr1	1.06369	0.488018	0.533178		Gpi1	4.85332	0.357363	7.00511e-05		Cd48	-6.38938	-0.668516	1.44465e-08		Smad7	-5.37007	-0.732196	5.18662e-06		Sh3kbp1	8.41061	0.922471	9.45914e-15		Mrpl54	5.75249	0.783262	6.27456e-07		Anxa11	4.50916	0.662894	0.000385246		Hcls1	8.50443	1.11945	1.44269e-14
Sipa1l1	2.7185	0.331541	0.0225494		Tmtc4	1.03807	0.240866	0.538786		Etv5	1.06096	0.513684	0.535039		Dgkz	4.84706	0.535895	7.28313e-05		Itm2b	-6.37808	-0.405289	1.55287e-08		Zfp706	-5.36595	-0.556484	5.308e-06		Cnbp	8.40515	0.659885	9.03561e-15		Mapkapk2	5.74393	0.939839	6.63734e-07		Tap1	4.49419	0.462879	0.000410293		Tceb2	8.50293	0.749425	1.24548e-14
Rcan3	2.71623	0.429953	0.0226867		Trav9-2	1.0352	1.15549	0.540657		Slc1a3	1.05966	1.82244	0.535815		Epb41l4aos	4.84042	0.642994	7.44469e-05		Cd86	-6.37758	-2.01991	1.70286e-08		Rbx1	-5.36216	-0.462068	5.37329e-06		Pnisr	8.40476	0.78153	9.9733e-15		Cdkn2d	-5.74391	-1.25838	6.68655e-07		Bzw2	-4.47514	-0.840309	0.000447799		Rhog	8.50113	1.34916	1.68797e-14
Rev1	2.71319	0.476299	0.0228589		Rundc3a	1.03229	0.222889	0.541685		Serpina9	1.05934	0.6441	0.535993		Smim14	4.83473	0.51241	7.60905e-05		2020-09-01	-6.36403	-0.570917	1.57925e-08		Ndufs5	-5.35697	-0.633032	5.47866e-06		Bclaf1	8.40472	0.907432	9.83293e-15		Cox6b1	5.7436	0.457953	6.56363e-07		2410002F23Rik	-4.46997	-1.49544	0.00047109		Cd3g	8.49128	0.655457	1.22236e-14
Itk	2.70588	0.211111	0.0232779		Nod1	1.02931	0.236629	0.54369		2810454H06Rik	1.05844	0.273859	0.536423		Cd84	4.82896	0.435398	7.80381e-05		Aimp1	-6.36071	-0.841525	1.67468e-08		Pmepa1	-5.35465	-0.98628	5.62721e-06		Jak1	8.39726	0.702834	1.04564e-14		Ifngr1	-5.73015	-0.782397	7.04224e-07		Ang	4.46352	2.25555	0.000489108		Paip2	8.46241	0.993867	2.04604e-14
Mettl8	2.69639	0.547514	0.0238489		Gm10717	1.02904	1.69606	0.54386		Airn	1.05702	0.245887	0.537556		Ttc39b	4.82647	0.558059	7.89313e-05		Mrpl52	-6.36048	-0.592584	1.65789e-08		Gltp	-5.35428	-0.606252	5.54913e-06		Arhgap4	8.395	1.09551	1.12105e-14		Snrpd2	5.72603	0.601467	7.16729e-07		Dok2	4.4624	0.664371	0.00047109		Rbx1	8.4576	0.877056	1.83146e-14
Utp14b	2.6939	1.02794	0.0239973		Fbxo10	1.0232	0.808535	0.547285		2900076A07Rik	1.0563	0.269184	0.538043		Zfp326	4.81586	0.814089	8.31596e-05		Srsf2	-6.35217	-0.747253	1.82686e-08		Chmp5	-5.34999	-0.834308	5.62721e-06		Il2ra	8.38697	1.11579	1.15769e-14		Metap2	5.72528	0.665388	7.16729e-07		Mdfic	4.45275	0.680359	0.000488369		Hexb	8.45526	1.78201	2.85688e-14
Zbtb11os1	2.69128	0.567063	0.0241074		Ddc	1.01905	0.642949	0.550119		6030468B19Rik	1.05384	0.915547	0.539642		Scand1	4.81537	0.359825	8.31596e-05		Rbms1	-6.33704	-0.977089	1.92769e-08		Gimap6	-5.34945	-0.428613	5.62721e-06		G3bp2	8.38343	0.894222	1.12105e-14		Cab39	5.7132	0.717821	7.86293e-07		Isg20	4.45242	0.79885	0.000488369		Slc25a5	8.45266	1.04087	1.85069e-14
Ggact	2.68787	0.546198	0.024332		Gbp5	1.01736	0.148712	0.5507		Pkp2	1.05361	1.08547	0.539781		Commd8	4.80862	0.615151	8.52451e-05		Cdc37	-6.33329	-0.706863	1.96009e-08		Metap2	-5.34814	-0.685875	5.76253e-06		Trp53inp1	8.38257	1.08727	1.23308e-14		Srp54b	5.70357	0.757415	8.08255e-07		Ccnd3	-4.44417	-0.536836	0.000505269		Rinl	8.44807	0.972841	2.12829e-14
Hsp90aa1	2.68233	0.159452	0.0246647		A930041C12Rik	1.01037	0.918453	0.555676		Epb41l4a	1.05316	1.01508	0.539987		Smco4	-4.80515	-0.756296	8.72841e-05		Krtcap2	-6.32434	-0.582552	2.03686e-08		Actr3	-5.34802	-0.419243	5.73772e-06		Abcb1a	8.37155	1.48532	1.32499e-14		Actb	5.7007	0.394542	8.20963e-07		Srgn	4.43371	0.45421	0.000530806		Sike1	8.44803	1.7735	3.36286e-14
1810041H14Rik	2.68087	0.744364	0.0247343		Tbc1d19	1.00881	0.641613	0.555676		Cirbp	1.05156	0.0983344	0.540869		Snrpg	4.80184	0.324257	8.74912e-05		Nop10	-6.30368	-0.668881	2.35681e-08		Igfbp4	-5.34647	-4.82858	6.62532e-06		Git2	8.36609	0.949266	1.36901e-14		Ndufa4	5.69272	0.475754	8.49886e-07		Lamp2	4.42263	0.939492	0.000556358		Apobec3	8.44433	0.902511	1.90204e-14
Poc1b	2.67996	0.590678	0.0247862		Evc	1.00878	1.69606	0.555676		Rdh12	1.04986	0.336039	0.541823		Klf2	4.79968	0.50438	8.79717e-05		Ccdc53	-6.29741	-1.20269	2.42414e-08		Sumo1	-5.34509	-0.468625	5.74983e-06		Tmem154	8.3599	1.24583	1.34938e-14		Cacna1s	5.68168	2.14585	9.843e-07		Cd44	4.41509	0.794377	0.000573007		Vcp	8.4402	1.09945	2.19093e-14
E230001N04Rik	2.676	0.446633	0.0250481		Rbp1	1.00878	1.69606	0.555676		Barx2	1.04347	0.947968	0.546643		Socs1	4.79952	0.60458	8.81499e-05		Banf1	-6.29719	-0.942505	2.50031e-08		Skil	-5.34105	-1.02195	5.9232e-06		H3f3a	8.35768	0.532728	1.26452e-14		Rab11a	5.6468	0.892588	1.11141e-06		Abcb9	4.41156	0.863957	0.000581431		Eva1b	8.40515	1.27568	3.02161e-14
Casp8	2.67512	0.17249	0.0251019		Gm15938	1.00878	1.69606	0.555676		Cpne7	1.04057	0.822437	0.54766		Cyth3	4.79913	0.674105	8.82253e-05		Gm8369	-6.28666	-0.780753	2.48673e-08		Il21r	-5.34047	-0.68377	5.83031e-06		Lrp10	8.3527	0.921087	1.43349e-14		Cox6c	5.64534	0.466148	1.10544e-06		Pgs1	4.39984	0.610582	0.000605114		Nrp1	8.39824	1.19179	2.94337e-14
Ifi47	2.67308	0.152215	0.0252397		RP23-6I17.1	1.00739	0.190532	0.555676		Ago4	1.03886	1.36301	0.548913		Top2b	4.79058	0.503998	9.18967e-05		Hnrnpa3	-6.27081	-0.59464	2.86996e-08		Phb2	-5.34018	-0.691293	5.99463e-06		Myl6	8.35175	0.62447	1.33478e-14		Lax1	5.64472	0.919529	1.11141e-06		Mien1	4.39916	0.490619	0.000605114		Smim15	8.39159	1.59809	4.04129e-14
Rcbtb1	2.66195	0.381274	0.0259438		Sapcd1	1.00464	0.44308	0.555676		Gm16503	1.03886	1.36301	0.548913		Wdr89	4.78803	0.401526	9.20719e-05		Uqcc2	-6.26747	-1.08938	2.98764e-08		Larp1	-5.34007	-0.931122	5.92745e-06		Anxa6	8.31648	0.962451	1.84124e-14		Naa20	5.64232	0.854949	1.12922e-06		Arhgap31	4.39815	0.541062	0.000605114		2310036O22Rik	8.39007	0.860692	2.68732e-14
Eif3e	2.63719	0.110805	0.0275951		Gm14764	1	20.0224	0.555676		Baz2b	1.03777	0.210202	0.549609		Zfp871	4.78763	0.646571	9.23809e-05		Fam189b	-6.25898	-0.736645	2.94039e-08		Srp14	-5.33846	-0.492422	5.9232e-06		Cd164	8.31263	0.997865	1.8883e-14		Ms4a6b	-5.64045	-0.451697	1.11141e-06		Peli1	4.39755	0.382044	0.000605114		Gabarap	8.38629	0.777805	2.71655e-14
Dtx1	2.62849	0.251362	0.0282068		4933415A04Rik	1	20.0224	0.555676		Slc9a9	1.03445	0.193938	0.551632		Hscb	4.78465	0.784159	9.35985e-05		Ssh2	-6.25517	-0.908573	3.00094e-08		Mif	-5.33187	-0.975144	6.73402e-06		Gimap5	8.30785	0.947248	1.9453e-14		Srsf2	5.63714	0.623954	1.13731e-06		Txndc17	4.39409	0.55144	0.000613386		Atp6v1f	8.38077	0.887568	2.90718e-14
Gm12840	2.59569	0.389211	0.0306488		Ighv6-3	1	20.0224	0.555676		Foxp2	1.03241	2.4074	0.55298		Asb2	-4.78303	-2.23722	9.79371e-05		Pcbp2	-6.24945	-0.634901	3.06059e-08		Hsd17b10	-5.32661	-0.773944	6.23835e-06		Stat3	8.28096	0.974589	2.53781e-14		Actg1	5.63507	0.513806	1.13534e-06		Rhoc	4.3854	1.84685	0.000657893		Pdcd10	8.37859	1.07842	3.54422e-14
Ttc13	2.59198	0.320545	0.0309373		Hoxc5	1	20.0224	0.555676		Ick	1.02497	0.305379	0.558139		Apol9b	4.78224	0.945591	9.46012e-05		Pdk1	-6.24133	-1.28284	3.36694e-08		Stk17b	-5.32416	-0.578597	6.27406e-06		Sash3	8.27496	0.879761	2.50493e-14		Cflar	5.62974	0.743447	1.20766e-06		Syt11	4.3853	0.67885	0.000636714		Dap	8.37509	2.17364	7.8793e-14
Pop5	2.58769	0.163854	0.0312795		Gm4221	1	20.0224	0.555676		Dcpp2	1.02416	1.50051	0.558593		Dusp11	4.78211	0.451354	9.44961e-05		Zcchc11	-6.22976	-0.768455	3.47661e-08		Itgb8	-5.32345	-1.9987	6.50551e-06		Ccm2	8.27491	0.863507	2.51293e-14		Vasp	5.62442	0.523221	1.20766e-06		Il6ra	-4.3819	-0.867082	0.000649538		Ube2d2a	8.36726	1.00456	3.75726e-14
Nop10	2.58743	0.137867	0.0313039		Arg2	1	20.0224	0.555676		Acad10	1.02362	0.531206	0.558918		Slc17a9	4.77433	0.805057	9.76395e-05		Uqcr11	-6.22745	-0.63403	3.6572e-08		Sin3b	-5.31941	-0.692053	6.42474e-06		Bnip3l	8.27487	0.779917	2.46654e-14		Lrba	5.62186	1.17846	1.28303e-06		Sri	4.38026	0.346404	0.000648993		Fam49b	8.34526	1.04125	4.94101e-14
Zdhhc14	2.58549	2.31173	0.0315005		Grm1	1	20.0224	0.555676		Tpbgl	1.01913	0.679479	0.561342		Kcnn4	4.76901	0.426582	9.91319e-05		Cct3	-6.22569	-0.740625	3.71479e-08		Psma6	-5.3185	-0.673578	6.50551e-06		Ube2d3	8.26458	0.604435	2.63182e-14		Hsp90aa1	5.61877	0.601931	1.23372e-06		3830406C13Rik	4.3796	0.868154	0.000652692		Def6	8.34491	1.40201	5.8537e-14
Tet3	2.57645	0.220084	0.0321527		Ppp1r42	1	20.0224	0.555676		Snn	1.0181	0.863079	0.562133		Cd28	4.76882	0.427906	9.91319e-05		Arpc3	-6.22159	-0.528851	3.6572e-08		Cd74	-5.31085	-1.27852	7.18e-06		Fis1	8.26036	0.764892	2.67186e-14		Tnfsf11	5.61031	1.30957	1.35564e-06		Stip1	-4.37226	-0.681122	0.000672914		Sf3b6	8.3165	0.941913	4.80642e-14
Clic4	2.56942	0.673454	0.0326963		Abcg4	1	20.0224	0.555676		Ccdc125	1.01632	0.223669	0.563253		Ikbke	4.76556	0.714726	0.000101051		Filip1l	-6.21467	-1.76905	4.09695e-08		Sdf4	-5.30904	-0.619003	6.98641e-06		Edf1	8.25676	0.669586	2.59759e-14		Mif4gd	5.607	0.807235	1.35179e-06		Ahnak	4.36852	0.656201	0.000672914		Uqcrfs1	8.31504	1.28534	6.39232e-14
Nle1	2.56277	0.460533	0.0332411		Gm2178	1	20.0224	0.555676		Oip5	1.01466	1.01508	0.564014		Stk10	4.76212	0.523033	0.000101648		Gm10073	-6.20087	-1.09902	4.1944e-08		Hnrnpa2b1	-5.30874	-0.437898	6.73402e-06		Fam107b	8.25253	0.882192	2.83805e-14		Gpr183	5.60491	1.13156	1.37783e-06		Cd247	4.36816	0.500306	0.000676501		Zc3hav1	8.31302	1.27312	6.48815e-14
Smo	2.55977	3.56327	0.0335731		Prps1l1	1	20.0224	0.555676		Zfp788	1.01337	0.280778	0.564014		Ikbkb	4.75628	0.492145	0.000104268		Ppp2r5a	-6.19537	-0.944965	4.21554e-08		Fth1	-5.30338	-0.280022	6.88054e-06		Nfatc1	8.25134	1.21038	3.0293e-14		Comt	5.60215	0.870933	1.35618e-06		Nhp2	-4.35736	-1.05772	0.000734477		Mettl23	8.3109	0.919138	4.94618e-14
Mrpl23	2.55946	0.158664	0.0334988		Plin5	1	20.0224	0.555676		Polh	1.01316	0.752048	0.564014		Rb1cc1	4.74705	0.574884	0.000109336		Eif1	-6.1932	-0.317431	4.32524e-08		Sell	-5.30255	-1.03359	6.98641e-06		Gls	8.24169	0.977561	3.2281e-14		Atp1a1	5.59292	0.805587	1.4226e-06		Ebi3	4.35531	1.10265	0.000714671		Pts	8.30868	1.58621	7.30304e-14
Myl10	2.54969	2.82631	0.034391		2610028H24Rik	1	20.0224	0.555676		Ceacam15	1.01267	2.23748	0.564014		Cxcr3	-4.72911	-0.906091	0.000119609		Ly6a	-6.19159	-1.03641	4.46265e-08		Pak2	-5.30063	-0.508177	6.93852e-06		Ppp1r18	8.21685	0.787983	3.98173e-14		Ctdnep1	5.57584	0.813446	1.55379e-06		Ifi27	4.35428	0.478269	0.000713762		Cst3	8.30254	1.14877	6.10476e-14
Traf4	2.54081	0.380421	0.0351261		Sdk1	1	20.0224	0.555676		Gm42757	1.01267	2.23748	0.564014		Itpr2	4.71481	0.488624	0.000126251		Shfm1	-6.18466	-0.477733	4.63267e-08		Pnisr	-5.29971	-0.512625	6.9816e-06		Mdh1	8.21112	0.783533	3.7397e-14		Treml2	-5.57552	-1.76081	1.68176e-06		Cebpb	4.34976	0.710417	0.000724934		Sfr1	8.2973	1.20798	6.48815e-14
Tubb2a	2.53941	0.59225	0.0352459		Tcrg-V5	1	20.0224	0.555676		Kalrn	1.01267	2.23748	0.564014		Tnrc6c	4.71137	0.432623	0.000128161		Hnrnpc	-6.18226	-0.695555	4.58627e-08		Tubb5	-5.29666	-0.604197	7.33733e-06		mt-Nd3	8.20464	0.517331	3.87576e-14		Nr4a3	5.55957	4.00916	2.02227e-06		Cish	4.34932	0.695636	0.000724934		Pitpna	8.29316	1.00588	5.75838e-14
Ggt5	2.53258	2.96381	0.0359316		Adamts18	1	20.0224	0.555676		Gm11261	1.01267	2.23748	0.564014		Tnik	4.70978	0.567186	0.000129055		Gm14085	-6.17519	-3.78152	5.85684e-08		Mrps14	-5.29506	-0.645675	7.10476e-06		Rac1	8.20337	0.718245	4.0521e-14		Ptp4a2	5.55623	0.521077	1.71355e-06		Entpd1	4.34749	1.05584	0.000738206		Ap3s1	8.29167	2.11196	1.04229e-13
Acsl3	2.51777	0.791817	0.0371334		Gm26865	1	20.0224	0.555676		RP23-272F2.2	1.01267	2.23748	0.564014		Arid1a	4.70968	0.432409	0.000128854		Snrpd2	-6.17225	-0.662514	5.09016e-08		Aimp1	-5.28113	-0.692132	7.5827e-06		mt-Nd1	8.18793	0.512597	4.44492e-14		Ndufb9	5.5483	0.513542	1.77287e-06		Cxcr6	4.33867	3.80229	0.000813597		Plp2	8.28988	1.83136	7.935e-14
Tcrg-C2	2.49159	2.75231	0.0396906		1700094J05Rik	1	20.0224	0.555676		Apc2	1.01267	2.23748	0.564014		Fam102a	4.70814	0.621385	0.000129288		Apbb1ip	-6.16725	-0.617566	4.91446e-08		Mrpl13	-5.2762	-0.94731	7.80007e-06		Ndufa13	8.18735	0.61687	4.60865e-14		Crlf3	-5.5477	-0.642563	1.79676e-06		Rab3ip	-4.33504	-1.2479	0.000775168		Elf1	8.27972	1.15681	6.96461e-14
Zfp652	2.47802	0.31542	0.0409143		Ctgf	1	20.0224	0.555676		Jam3	1.01267	2.23748	0.564014		Zfp638	4.70655	0.511053	0.000129698		Actg1	-6.16691	-0.603887	5.21445e-08		Gngt2	-5.2737	-1.41078	7.94682e-06		Pbxip1	8.18635	1.07843	5.0226e-14		Atp5j2	5.53557	0.430065	1.91593e-06		Cmah	-4.32896	-1.60687	0.000811284		Eif4h	8.27752	1.10192	6.28939e-14
Ccnd3	2.47243	0.134095	0.0414601		Kcna6	1	20.0224	0.555676		Pde1c	1.01267	2.23748	0.564014		Skap1	4.70445	0.303526	0.000129909		Fam49b	-6.15511	-0.636612	5.24977e-08		Ndufa7	-5.27335	-0.46263	7.81192e-06		Foxo1	8.17237	0.995507	5.81961e-14		Ndufa5	5.53077	0.56963	1.9496e-06		Arhgap5	-4.32881	-1.28629	0.000800638		Snrpe	8.27711	0.906459	6.36596e-14
Lman2l	2.46455	0.25599	0.0422154		Lonrf2	1	20.0224	0.555676		Vmn2r29	1.01267	2.23748	0.564014		Cdkn1b	4.70434	0.426395	0.000129909		Efr3a	-6.15164	-0.98396	5.42293e-08		Atxn10	-5.27247	-0.903142	7.87228e-06		Dek	8.16814	0.916291	5.67993e-14		Notch1	5.53046	0.805373	1.97071e-06		Set	-4.32816	-0.496208	0.000808579		Tpr	8.26844	1.12558	9.58566e-14
Gm10269	2.46401	0.826306	0.0422817		Esam	1	20.0224	0.555676		Gm6288	1.01267	2.23748	0.564014		Cnn2	4.70394	0.312372	0.000129909		Rhoa	-6.14475	-0.468191	5.46541e-08		Cyb5a	-5.26794	-0.512085	8.0236e-06		Mark2	8.1641	0.957568	5.70694e-14		Zc3h12d	5.52834	1.10382	2.02227e-06		Dynlrb1	4.32567	0.456865	0.000793305		D8Ertd738e	8.25691	0.936912	7.26057e-14
Gart	2.45667	0.287886	0.0429942		Sp9	1	20.0224	0.555676		Acpt	1.01267	2.23748	0.564014		Ccni	4.69917	0.592372	0.000133327		Mbd2	-6.13319	-0.614223	6.03583e-08		Srsf6	-5.26699	-0.735271	8.09948e-06		Slc9a3r1	8.16042	0.766931	5.73232e-14		Fundc2	5.52537	0.704708	2.00427e-06		Stk38	-4.32046	-0.686883	0.000813597		Hmgb1	8.25634	0.866776	8.15906e-14
Rbfa	2.45624	0.248508	0.0430385		Ebf2	1	21.0224	0.555676		Gm13610	1.01267	2.23748	0.564014		Slfn2	4.69592	0.355457	0.000134206		Pik3r1	-6.12764	-0.85474	6.12304e-08		Churc1	-5.26109	-0.680528	8.20347e-06		Cldnd1	8.16018	1.28388	6.38185e-14		Tmed9	5.52514	0.547131	2.00427e-06		Capns1	4.31473	0.51644	0.000819065		Arpc5l	8.2449	0.982847	7.67553e-14
Ly6c2	2.45574	2.14823	0.0431617		Pate4	1	20.0224	0.555676		Mzb1	1.01267	2.23748	0.564014		Pdlim1	4.69193	0.65017	0.000136546		Ncl	-6.12227	-0.806331	7.33254e-08		Lrig1	-5.26036	-1.35631	8.51744e-06		Srp14	8.15814	0.747578	6.07752e-14		Ube2i	5.52282	0.474627	2.00427e-06		Crmp1	4.31357	1.3846	0.000829696		Cmpk1	8.24285	1.32309	8.38718e-14
Klf6	2.45185	0.18634	0.0434908		Tspan33	1	21.0224	0.555676		Ccl5	1.01156	0.319244	0.564014		Mrpl24	4.69003	0.461605	0.000137667		Tubb5	-6.12169	-0.691689	7.04461e-08		Cdk2ap2	-5.25892	-0.41694	8.25014e-06		Phf3	8.15525	0.822777	5.81961e-14		Ube2l3	5.52244	0.564129	2.00847e-06		Eif4a2	-4.31294	-0.433514	0.000825073		Ndufa4	8.20699	0.878528	1.124e-13
Osm	2.4456	0.442041	0.0441114		1700016G22Rik	1	20.0224	0.555676		Ccdc162	1.0075	1.60005	0.564014		Ep400	4.68278	0.555214	0.000141988		Cyth1	-6.11603	-0.932412	6.57306e-08		Atp5k	-5.25221	-0.605926	8.59635e-06		Sf3b2	8.15241	0.785812	6.34705e-14		Bcl11b	-5.51507	-0.540408	2.05474e-06		Mrpl38	-4.30818	-0.99749	0.000845238		Smap1	8.19978	1.16532	1.39561e-13
Trib3	2.44318	1.28199	0.0443775		4930535I16Rik	1	20.0224	0.555676		RP23-216D14.1	1.0075	1.60005	0.564014		Adamts6	4.6774	1.35543	0.000147476		Mettl23	-6.11381	-0.608377	6.54558e-08		Uqcr11	-5.25111	-0.538746	8.66054e-06		Mef2d	8.14998	1.08679	6.45715e-14		Smarca5	5.51408	0.702986	2.10865e-06		Slc16a6	4.30521	1.11074	0.000854432		Calm3	8.19636	1.34411	1.67028e-13
Ube2cbp	2.43304	0.943119	0.0453784		Ccdc175	1	20.0224	0.555676		Nbea	1.0075	1.60005	0.564014		2700060E02Rik	4.66937	0.367013	0.000150224		Pdcd2	-6.11367	-0.994046	6.80949e-08		Hmgn1	-5.24757	-0.826793	8.84167e-06		Ppp1ca	8.14769	0.671643	5.81961e-14		Gm37387	-5.51318	-2.72486	2.32471e-06		A630023P12Rik	4.3012	0.688436	0.000860689		Tmem126a	8.19547	1.5029	1.2902e-13
Lsm11	2.42522	0.435665	0.046199		Dhtkd1	1	20.0224	0.555676		Lrriq3	1.0075	1.60005	0.564014		Arhgdib	4.65834	0.26936	0.000157822		Acbd6	-6.10468	-0.94609	7.04461e-08		Tnfsf8	-5.23596	-1.5617	9.8392e-06		Grap	8.1332	0.833529	6.87514e-14		Lsm6	5.51166	0.6656	2.12767e-06		Lpar6	4.29968	1.01487	0.000875279		1700097N02Rik	8.19237	3.1153	2.99918e-13
Whsc1l1	2.42253	0.128869	0.0464893		Htr3a	1	20.0224	0.555676		Hist1h2ad	1.0075	1.60005	0.564014		Arhgap30	4.6474	0.427105	0.000166666		Pik3cd	-6.10359	-1.07077	7.05613e-08		Batf	-5.22985	-1.22864	1.03567e-05		Psma3	8.13238	0.65902	6.6203e-14		Psma2	5.50863	0.506465	2.15131e-06		Borcs8	4.29772	0.634999	0.000869128		Myeov2	8.19054	1.0412	1.18977e-13
Pdlim4	2.42057	3.41127	0.0467996		Gm11738	1	20.0224	0.555676		Btnl6	1.0075	1.60005	0.564014		Ptprc	4.64122	0.290293	0.000170984		Clec2d	-6.10023	-0.456875	7.00658e-08		Spint2	-5.22572	-0.82865	9.72141e-06		Cers4	8.12952	1.19065	7.94706e-14		Wls	5.50576	0.844093	2.17442e-06		Rcc2	-4.29575	-0.829064	0.000888861		Prkcq	8.1817	1.1279	1.3972e-13
Gm15859	2.41899	2.0487	0.0469444		RP23-152B12.3	1	20.0224	0.555676		Sult1a1	1.0075	1.60005	0.564014		Senp7	4.64051	0.602819	0.000171204		Wdr82	-6.09968	-1.07609	7.23272e-08		1500011K16Rik	-5.22393	-1.30027	9.95215e-06		Crebbp	8.12693	0.958629	7.28842e-14		Hnrnpk	5.5036	0.419679	2.17652e-06		Ccdc64	-4.28876	-1.52266	0.000920595		Tmem258	8.16559	0.911941	1.34042e-13
Wdr46	2.41849	0.297757	0.0469444		Gjd3	1	20.0224	0.555676		D130043K22Rik	1.0075	1.60005	0.564014		Cdc42se2	4.63732	0.377599	0.000173114		Gm9843	-6.09963	-0.894779	7.04461e-08		Hspa8	-5.22066	-0.407378	1.01231e-05		Dazap2	8.12591	0.962778	7.72006e-14		Tigit	5.49829	2.43271	2.4478e-06		Vsir	4.2753	0.576775	0.000948082		BC021614	8.16425	1.57267	1.86982e-13
Oasl1	2.41148	0.838584	0.0476781		Gm15976	1	20.0224	0.555676		Gm38287	1.0075	1.60005	0.564014		Rcsd1	4.63111	0.426412	0.000177351		Cox5a	-6.09903	-0.637467	7.2383e-08		Srrm2	-5.21836	-0.382957	1.01021e-05		Brd2	8.11941	0.906208	7.65005e-14		Samhd1	-5.49304	-0.572699	2.31045e-06		Camk4	4.26372	0.641747	0.000996971		Chmp2a	8.15961	0.966617	1.39929e-13
Wfdc2	2.41115	1.59449	0.0477318		Gm15347	1	20.0224	0.555676		Orm2	1.0075	1.60005	0.564014		Gm21092	4.63071	0.522466	0.000177351		Cox7b	-6.09863	-0.566664	7.17363e-08		Pou2f2	-5.21647	-0.646135	1.01309e-05		Atf7ip	8.11277	0.870103	7.65005e-14		Arf4	5.49283	0.612138	2.29692e-06		Epcam	4.26262	0.967145	0.00100988		Smco4	8.15226	1.38369	1.48818e-13
Aimp2	2.40981	0.329351	0.0478336		Gm26600	1	20.0224	0.555676		Gm10614	1.0075	1.60005	0.564014		Socs2	4.63047	0.883417	0.000177778		Ly6e	-6.09504	-0.398371	7.17363e-08		Aprt	-5.20425	-0.658354	1.08789e-05		Hcst	8.11248	0.673503	7.74319e-14		Wdr83os	5.49125	0.642513	2.31788e-06		Banf1	-4.25844	-0.669515	0.00102763		Dusp11	8.13876	1.04593	1.68593e-13
Tgfbr3	2.39503	0.855452	0.0494926		Slc40a1	1	20.0224	0.555676		Gm16157	1.00561	0.35981	0.564014		Pnn	4.62639	0.411117	0.000180563		S100a11	6.09484	0.692309	7.05613e-08		Wdr83os	-5.20421	-0.670284	1.08553e-05		Matr3	8.11145	0.797037	7.91117e-14		Tuba1c	5.49024	1.23313	2.38436e-06		Cox6c	4.25624	0.329874	0.00102184		Ppp1r12a	8.13633	1.1463	1.8475e-13
Gm15441	2.39022	1.2074	0.0500738		Gm9970	1	20.0224	0.555676		Cdcp1	1.00472	0.620803	0.564014		Sptbn1	4.62562	0.51888	0.000180766		Gbp4	-6.09426	-1.08185	7.33069e-08		Atp1b3	5.20345	0.529501	1.05654e-05		Actr2	8.10959	0.831294	7.98411e-14		Canx	5.48712	0.782637	2.39246e-06		Ebpl	4.25231	0.679817	0.00103619		Churc1	8.11867	1.10376	1.93467e-13
Arap2	2.3859	0.228681	0.0505581		4930444E06Rik	1	20.0224	0.555676		Zc3h6	1.00204	0.207288	0.564014		Glipr2	4.62449	0.614358	0.000180831		Myc	-6.09186	-2.86912	8.97616e-08		Ctsz	-5.20292	-0.856838	1.08617e-05		Cdipt	8.10529	0.890685	8.70917e-14		Plekho1	5.48469	1.94681	2.54598e-06		Slc45a4	4.24727	1.04571	0.00107008		Glipr1	8.11359	1.44715	2.36827e-13
Pknox1	2.38284	0.289172	0.0509052		9430097D07Rik	1	20.0224	0.555676		Prpf40b	1.00113	0.515776	0.564014		Setx	4.62419	0.641307	0.000180936		Dock10	-6.08847	-0.722976	7.45199e-08		Acbd6	-5.1969	-0.794943	1.09958e-05		Ash1l	8.10506	0.947403	8.72904e-14		Ybx1	5.47905	0.561858	2.4483e-06		Rrs1	-4.24636	-1.48237	0.00109067		Sh3kbp1	8.10702	1.13689	2.3222e-13
Hist1h4n	2.38263	0.898456	0.0509409		Myl2	1	20.0224	0.555676		5730403I07Rik	1	20.1325	0.564014		Etnk1	4.62418	0.519257	0.000180915		Aven	-6.08704	-1.47653	7.77526e-08		Larp1b	-5.19641	-1.21552	1.13589e-05		Fgfr1op2	8.08681	0.948038	9.67344e-14		Inpp5b	5.47806	1.06459	2.4792e-06		Mrps18b	-4.2389	-1.16713	0.00110312		Lamtor4	8.10523	1.05331	2.15875e-13
Nrros	2.37688	0.335526	0.0515821		Tnfaip6	1	20.0224	0.555676		Gm17615	1	20.1325	0.564014		Galnt10	4.6134	1.10838	0.000190986		Trmt112	-6.08453	-0.659896	7.55572e-08		Ptpn22	-5.1963	-0.697709	1.09958e-05		Tmem234	8.08402	0.771501	9.60482e-14		Casp3	5.47416	2.01789	2.70902e-06		Stk17b	4.23016	0.441148	0.00112743		Clint1	8.10161	1.12004	2.14672e-13
Lhfp	2.3737	3.41127	0.0520052		Gm29434	1	20.0224	0.555676		Gm22	1	20.1325	0.564014		Trim12c	4.61224	0.609435	0.000190701		Fam105a	-6.07963	-0.727575	7.77526e-08		Fundc2	-5.19257	-0.786514	1.11881e-05		Sat1	8.08055	0.84452	9.44286e-14		Usmg5	5.46949	0.553618	2.54598e-06		Snapc5	4.22636	0.621726	0.00114244		Dnajc8	8.08428	1.01223	2.44016e-13
Rassf3	2.36942	0.506889	0.0524135		Lhfpl5	1	20.0224	0.555676		Epha10	1	20.1325	0.564014		Tcf25	4.61086	0.411302	0.000190791		Rasgrp1	-6.07181	-0.879412	8.00526e-08		Hint3	-5.1914	-1.09255	1.13589e-05		Smc4	8.07989	0.679528	9.84207e-14		Slfn2	5.4678	0.554636	2.65472e-06		M6pr	4.22061	0.6236	0.00116952		Mdh2	8.08068	0.938436	2.45526e-13
Nin	2.36378	0.240397	0.0530877		Gm17224	1	20.0224	0.555676		Gpc6	1	20.1325	0.564014		Stx16	4.6079	0.483384	0.000192331		Psmb2	-6.07031	-0.728415	8.17514e-08		Tgfbr1	-5.18215	-1.05715	1.23188e-05		Runx1	8.0729	1.08531	1.09052e-13		Fis1	5.4662	0.521811	2.58695e-06		Ftsj3	-4.21978	-1.25746	0.00119362		Sec11a	8.067	0.956224	2.85155e-13
Fam84b	2.35775	0.841736	0.0537924		Fcrl6	1	20.0224	0.555676		Dlx3	1	20.1325	0.564014		Il16	4.60417	0.375402	0.000195524		Tspan13	-6.07005	-0.759783	8.17856e-08		Apol9b	-5.17993	-1.77278	1.23188e-05		Itgb2	8.07288	0.815031	1.02609e-13		Tmem154	5.4514	0.901697	2.83962e-06		Tecr	4.21393	0.423991	0.00119531		Ubl3	8.06108	1.18704	2.74599e-13
Qser1	2.35685	0.656381	0.0538711		Csmd3	1	20.0224	0.555676		Gm960	1	20.1325	0.564014		2020-09-06	4.60009	0.455157	0.000199147		G3bp1	-6.05112	-0.692431	9.34639e-08		Tnfrsf1b	-5.17887	-1.02389	1.23188e-05		Vcp	8.07099	0.832169	1.02965e-13		Axl	5.44518	1.55338	3.01266e-06		Ky	4.21297	2.61493	0.00125961		Coro1b	8.0576	1.35169	3.64419e-13
9030617O03Rik	2.35519	0.961961	0.0540672		Gm3591	1	20.0224	0.555676		Pcdh17	1	20.1325	0.564014		Ube2d2a	4.59727	0.382332	0.000200955		Txn2	-6.04851	-0.799482	9.42989e-08		Bsg	-5.17291	-0.585409	1.23188e-05		Diaph1	8.07008	0.99615	1.10721e-13		Srsf9	5.44428	0.705453	2.88933e-06		H2-T22	4.20528	0.382233	0.00123748		Cd28	8.0489	1.01569	3.1552e-13
Ssbp2	2.35414	0.168237	0.0541879		Gm43904	1	20.0224	0.555676		Slc41a2	1	20.1325	0.564014		Golgb1	4.59129	0.637105	0.000207024		Taf1d	-6.04817	-1.17501	9.42989e-08		Glrx3	-5.17239	-0.700937	1.23666e-05		Hnrnpk	8.0654	0.585989	1.02565e-13		Fam160a1	5.4392	2.01987	3.23742e-06		Ncl	-4.20108	-0.573263	0.00131808		Atpif1	8.04448	1.39536	3.97584e-13
Usp22	2.35023	0.405063	0.0546828		Cpa3	1	20.0224	0.555676		Gm15718	1	20.1325	0.564014		Luc7l2	4.57695	0.383045	0.000219845		Gpi1	-6.04642	-0.560904	9.2955e-08		Ldlrad4	-5.16758	-1.18957	1.27329e-05		Tcf12	8.06337	1.05403	1.14662e-13		Cox5a	5.43847	0.527945	2.95609e-06		Rgs1	4.20024	0.61958	0.0012628		Fgfr1op2	8.0429	1.19262	3.54938e-13
Impg1	2.34438	3.63366	0.0554757		Gm10608	1	20.0224	0.555676		Wdr31	1	20.1325	0.564014		S1pr1	4.57298	0.599823	0.000223189		Uqcrq	-6.04402	-0.646359	9.8309e-08		Rcn1	-5.16731	-1.23373	1.26843e-05		Ddx6	8.06	0.820391	1.11539e-13		Cotl1	5.43635	0.513792	3.02451e-06		Tap2	4.19866	0.419616	0.00126558		Cyba	8.03872	0.832766	3.1858e-13
Gm10640	2.34438	3.63366	0.0554757		Fam198a	1	20.0224	0.555676		Gm26858	1	20.1325	0.564014		Nfat5	4.55962	0.598238	0.00023757		Srsf5	-6.04157	-0.515665	9.42989e-08		Tecr	-5.16717	-0.557377	1.24294e-05		Cd48	8.04016	0.779652	1.28817e-13		Ndufb2	5.42813	0.715407	3.1307e-06		Cd27	4.19422	0.30711	0.00128398		Gltscr2	8.03379	0.905348	3.29919e-13
Adgre5	2.33167	0.164459	0.0570398		Tmprss5	1	20.0224	0.555676		Hoxa3	1	20.1325	0.564014		Wipi2	4.55919	0.719375	0.000238104		Arpc2	-6.03625	-0.441855	9.87145e-08		Btf3l4	-5.16509	-0.985566	1.26971e-05		Arpc1b	8.03945	0.641615	1.2444e-13		Tma7	5.42214	0.40752	3.20107e-06		Wdr43	-4.19065	-0.897064	0.00131988		Ftl1	8.02427	0.708994	3.29919e-13
Kctd6	2.3307	0.627892	0.0571667		Gm28730	1	20.0224	0.555676		Gm42800	1	20.1325	0.564014		Zfp706	4.55323	0.365506	0.000242582		Nmi	-6.02744	-0.83689	1.02288e-07		Scp2	-5.16055	-0.50385	1.27652e-05		Sp100	8.03266	0.73843	1.43514e-13		Larp7	5.41673	1.03087	3.34755e-06		Mrto4	-4.18954	-1.20675	0.00133797		Sla	8.01197	1.27933	4.06503e-13
Wnt3	2.32961	1.13665	0.0572978		Gm26863	1	20.0224	0.555676		1700030N03Rik	1	20.1325	0.564014		Gbp5	4.55237	0.759794	0.000243887		Mbnl1	-6.02519	-0.406076	1.0647e-07		Ebi3	-5.16003	-1.98294	1.38964e-05		Thrap3	8.02704	0.860684	1.40432e-13		Ergic1	5.41536	1.27904	3.44363e-06		Hpgds	4.18947	1.449	0.00132215		Minos1	8.01141	0.970146	3.68541e-13
Raver2	2.32534	2.34088	0.0577964		Mgat4e	1	20.0224	0.555676		Gm43532	1	20.1325	0.564014		Hdgfrp3	4.5481	0.829972	0.000249518		Nhp2	-6.016	-1.47258	1.24006e-07		Ndufa5	-5.15005	-0.578946	1.34833e-05		mt-Nd5	8.01112	0.592101	1.56618e-13		Srp14	5.41426	0.471349	3.31596e-06		Cdc42	4.18719	0.333196	0.00131808		Ikzf2	8.0092	0.878889	3.68541e-13
Rpp38	2.32201	0.474677	0.0581627		Ttc34	1	20.0224	0.555676		Ugt1a10	1	20.1325	0.564014		Ppp2r5c	4.53786	0.583069	0.000259933		Ccs	-6.00362	-0.967942	1.18332e-07		Dnmt3a	-5.13247	-1.12451	1.49739e-05		Crbn	8.00295	1.08531	1.77403e-13		Ranbp1	5.40686	0.680558	3.4139e-06		Ranbp1	-4.18511	-0.688801	0.00135556		Aurkaip1	8.00763	1.01046	3.83958e-13
P4ha1	2.31741	0.208439	0.0587671		Htr2a	1	20.0224	0.555676		Vstm5	1	20.1325	0.564014		Casp8	4.53227	0.436969	0.000265125		Ndrg3	-6.00252	-1.41669	1.24577e-07		Laptm5	-5.11507	-0.362655	1.60814e-05		Klf13	7.9926	0.721403	1.79808e-13		Limd2	5.3985	0.365587	3.56295e-06		Noc2l	-4.1847	-1.13124	0.00134549		Ppp1cc	7.99857	1.04301	4.7027e-13
Fam102b	2.31562	0.58238	0.058956		Fam171a2	1	20.0224	0.555676		Tnc	1	20.1325	0.564014		Dgkd	4.53151	0.684667	0.000266476		2700060E02Rik	-5.99982	-0.625681	1.18332e-07		1810022K09Rik	-5.10495	-0.635946	1.69487e-05		Fam134b	7.98273	0.922157	1.98305e-13		Lmbrd1	5.3953	0.919258	3.70987e-06		Cxcr4	-4.18433	-1.02571	0.0013393		Ly6e	7.98287	0.684905	4.71042e-13
Dhodh	2.3154	0.405463	0.0589715		RP23-302N11.3	1	20.0224	0.555676		Gm5435	1	20.1325	0.564014		Mrps16	4.52568	0.417062	0.00027206		Zdhhc20	-5.99757	-0.879197	1.21599e-07		Bcl11b	-5.10239	-0.439348	1.69487e-05		Acin1	7.97285	0.794474	2.05999e-13		H2-Q7	5.39028	0.326393	3.72207e-06		Tmem140	4.1787	1.22541	0.00135709		Capn2	7.97848	1.76112	7.36129e-13
Selp	2.31491	1.66584	0.059069		Gm37027	1	20.0224	0.555676		Cxcl12	1	20.1325	0.564014		Blvrb	4.51045	1.09913	0.000293342		Lef1	-5.99358	-0.863513	1.24577e-07		Mgst2	-5.10201	-0.704485	1.69694e-05		Cbx3	7.97181	0.80064	2.21163e-13		Nedd8	5.38854	0.478006	3.75078e-06		Sytl1	4.16945	0.904951	0.00140495		Prkar1a	7.97343	0.979238	4.98559e-13
Klhdc1	2.31418	0.365576	0.0591154		Elavl2	1	20.0224	0.555676		A930011G23Rik	1	20.1325	0.564014		Itgb2	4.51042	0.394732	0.000291015		Mybbp1a	-5.99066	-1.75714	1.39226e-07		Itgb2	-5.10194	-0.574173	1.69982e-05		Chmp4b	7.9687	0.731182	2.10661e-13		Dph3	5.38838	0.801066	3.78467e-06		Mrpl23	-4.16601	-0.56833	0.00141777		Cdipt	7.96558	1.07003	5.54701e-13
Pkp4	2.3096	0.466685	0.0597253		Proser2	1	20.0224	0.555676		Lypd4	1	20.1325	0.564014		Arglu1	4.50202	0.38462	0.000301454		Rap1b	-5.9878	-0.579568	1.28943e-07		Hdac1	-5.10189	-0.712117	1.70142e-05		Zfp638	7.96722	0.985938	2.31263e-13		Pkp3	5.38296	0.727123	3.96465e-06		Rab11a	4.16536	0.683855	0.00141777		Pdcd6ip	7.96503	1.28198	6.21385e-13
1700102P08Rik	2.29769	1.59184	0.0613598		Rnf183	1	20.0224	0.555676		Klrg2	1	20.1325	0.564014		Gm10073	4.49898	0.536131	0.00030462		Tmem64	-5.98655	-1.56125	1.33897e-07		Ddx21	-5.10011	-0.895959	1.75952e-05		Dapp1	7.96678	1.0824	2.14312e-13		Slfn1	-5.37937	-0.915116	3.9488e-06		Atp6v1d	4.16377	0.54613	0.00142359		Cox5a	7.94774	0.948167	5.72256e-13
Slc22a5	2.29504	0.59498	0.0616458		Gm26770	1	20.0224	0.555676		Gm15416	1	20.1325	0.564014		Cd5	4.49866	0.41298	0.000304673		Ppa1	-5.97934	-1.49556	1.46395e-07		Cfdp1	-5.10006	-0.70117	1.70511e-05		Purb	7.9535	0.762461	2.39336e-13		Tm2d3	5.37637	0.809083	4.01059e-06		Prmt3	-4.15918	-1.26608	0.00146162		Arhgap30	7.94424	0.998217	6.08397e-13
Mcmbp	2.28139	0.186611	0.063619		9130213A22Rik	1	20.0224	0.555676		Nat8	1	20.1325	0.564014		Faah	4.49718	0.535419	0.000306258		Ctss	-5.97057	-0.586437	1.39226e-07		Ecm1	-5.09936	-1.2695	1.75667e-05		Rbl2	7.95308	1.3247	2.66304e-13		Fubp1	5.37628	0.519971	3.96799e-06		H2afv	4.15621	0.415468	0.00146067		Cox6a1	7.9409	1.04966	7.85597e-13
A530040E14Rik	2.27598	0.948296	0.0644197		Gm16043	1	20.0224	0.555676		Fam227b	1	20.1325	0.564014		Ccdc53	4.49524	0.595055	0.000308848		Ndufa2	-5.96989	-0.507392	1.39315e-07		Agpat3	-5.09672	-0.758866	1.72458e-05		Arf5	7.94528	0.592663	2.42449e-13		Hmgn3	5.37612	1.56368	4.1629e-06		Fth1	4.14855	0.224689	0.00150029		Pstpip1	7.93506	1.28582	8.00734e-13
Ptk2	2.27578	1.05258	0.0644412		Gm16234	1	20.0224	0.555676		Vil1	1	20.1325	0.564014		Parp14	4.4939	0.490263	0.000308848		Cdc42	-5.96517	-0.49145	1.44494e-07		Psmb2	-5.0829	-0.593037	1.84168e-05		Apbb1ip	7.93843	0.734815	2.71735e-13		Fam189b	-5.36601	-0.670785	4.1629e-06		Tnfrsf13b	4.14827	0.789021	0.00150415		Grap	7.92162	1.02742	7.47731e-13
Zfp354c	2.27278	1.50438	0.0648365		Gm15346	1	20.0224	0.555676		Krtap19-9b	1	20.1325	0.564014		Psme2b	4.49088	0.648488	0.000312237		Myh9	-5.96085	-0.586417	1.49107e-07		Stx6	-5.08193	-0.877561	1.84168e-05		Irf1	7.9318	0.910127	2.80463e-13		Ptprc	5.36151	0.383544	4.25403e-06		Cstb	4.13691	0.675788	0.00157216		Txn1	7.92068	1.25068	9.46168e-13
Apbb2	2.27163	1.59184	0.0649938		Ehd2	1	20.0224	0.555676		Plekhg6	1	20.1325	0.564014		Selplg	4.49046	0.317023	0.000312237		Ssu72	-5.95834	-0.685281	1.48342e-07		Gm9493	-5.08083	-0.845849	1.84235e-05		Dennd1c	7.9269	1.00192	2.93438e-13		Gps1	5.35667	0.824631	4.38614e-06		Osbpl3	4.13638	0.920254	0.00157702		Ndufb10	7.91963	0.979788	7.74843e-13
Pprc1	2.27141	0.444671	0.0649938		Gm26656	1	20.0224	0.555676		Gm11614	1	20.1325	0.564014		Ddit4	4.48577	0.550712	0.000319476		Taf10	-5.94682	-0.559257	1.60276e-07		Mettl23	-5.07963	-0.492295	1.8498e-05		Pcbp2	7.92571	0.711542	2.87359e-13		Snf8	5.35559	0.652007	4.39429e-06		Mif	-4.13352	-0.798976	0.00165632		Lbr	7.9196	1.33584	9.35547e-13
Trat1	2.26918	0.553846	0.0653083		Gm816	1	20.0224	0.555676		Gm16381	1	20.1325	0.564014		Celf2	4.47655	0.361719	0.000331454		Arhgap15	-5.93599	-0.615638	1.65093e-07		Set	-5.07815	-0.546144	1.91777e-05		Tmem173	7.92417	0.9467	3.02408e-13		Psmc5	5.35371	0.645489	4.4144e-06		Rap1b	4.12315	0.381209	0.00165421		Uqcrc2	7.90775	1.05785	8.33969e-13
Gfer	2.26306	0.234756	0.0661362		Cxcl16	1	20.0224	0.555676		Gm13620	1	20.1325	0.564014		2410015M20Rik	4.46417	0.367232	0.000349884		Arhgef18	-5.92711	-1.37454	1.84656e-07		Ptprc	-5.0725	-0.353181	1.91777e-05		Tra2a	7.9124	0.777259	3.22603e-13		Znrd1	5.35196	0.683997	4.4539e-06		Glmp	4.12286	0.573584	0.00165606		Sepp1	7.90101	1.57224	1.28247e-12
Nup43	2.26291	0.396493	0.0661509		Gm6741	1	20.0224	0.555676		Peg12	1	20.1325	0.564014		Prpf38b	4.46042	0.435808	0.000356596		Hnrnpa2b1	-5.91454	-0.47382	1.95085e-07		Itpr2	-5.07245	-0.720259	1.91131e-05		Phip	7.91013	0.902994	3.40925e-13		Med11	5.33464	1.17653	5.06652e-06		Fnbp1	4.1222	0.511214	0.00165607		Pnrc2	7.88503	1.3925	1.07908e-12
Sigmar1	2.25217	0.313684	0.0677411		1700099I09Rik	1	20.0224	0.555676		Nid1	1	20.1325	0.564014		Tnks2	4.45437	0.582131	0.000364862		Cish	-5.90447	-1.15581	2.07199e-07		Mcl1	-5.07205	-0.40216	1.90637e-05		Ablim1	7.90897	0.754149	3.36904e-13		Cd200	5.32203	1.12215	5.26406e-06		Fam129a	4.12155	0.733916	0.00165632		Ap2s1	7.8761	1.33091	1.28442e-12
Abcb11	2.23897	21.6259	0.0699067		Oxt	1	20.0224	0.555676		Mfsd7c	1	20.1325	0.564014		4932438A13Rik	4.45329	0.538408	0.000365946		Slc17a9	-5.90078	-1.64558	2.18065e-07		Hspa5	-5.06774	-0.606268	1.98977e-05		Itgal	7.89677	0.922248	3.72671e-13		Zfpm1	5.3183	1.10014	5.38971e-06		Wdr75	-4.11884	-1.59244	0.00170637		Grk6	7.87526	1.15606	1.02189e-12
Wdr4	2.23314	0.439597	0.0706821		Hgd	1	20.0224	0.555676		C330002G04Rik	1	20.1325	0.564014		Eif1	4.45162	0.212808	0.000367202		Cd55	-5.89949	-3.06176	2.4113e-07		Tcf7	-5.06393	-0.828217	1.99893e-05		Jmjd1c	7.88663	1.08045	4.13599e-13		Rnaset2b	5.31389	0.501844	5.38971e-06		Ube2i	4.11765	0.358975	0.00167258		Ube2i	7.86212	0.80431	9.47673e-13
Ddx18	2.23284	0.164363	0.0707265		Gm13269	1	20.0224	0.555676		Gm20537	1	20.1325	0.564014		Snrpf	4.44784	0.334153	0.000371893		Sec11a	-5.88875	-0.59859	2.17611e-07		Brk1	-5.06101	-0.488676	1.99893e-05		Crebrf	7.88475	1.06964	4.01556e-13		Dnaja1	5.30285	0.467224	5.70581e-06		Hcls1	4.11397	0.449548	0.00169532		Ndufa8	7.85686	1.04999	1.14619e-12
Lair1	2.22621	1.20182	0.0718226		Dcbld1	1	20.0224	0.555676		Gm5860	1	20.1325	0.564014		Lta	4.44691	1.10453	0.000378604		Slc25a3	-5.88715	-0.545208	2.18837e-07		Matr3	-5.06044	-0.560295	1.99893e-05		Park7	7.88367	0.587815	3.68747e-13		Prdm1	5.2998	1.5267	6.20018e-06		Eef1d	-4.11138	-0.330034	0.0017194		Adgre5	7.84488	1.19628	1.32895e-12
Ccdc85b	2.224	0.354872	0.0721304		Gm15522	1	20.0224	0.555676		Mageb3	1	20.1325	0.564014		2010107E04Rik	4.4457	0.352757	0.000375197		Slc25a4	-5.88039	-0.874228	2.29592e-07		Csnk2b	-5.05723	-0.664036	2.02788e-05		Cd247	7.88199	0.81165	4.01556e-13		Prkcsh	5.29467	0.931338	6.03267e-06		Pecam1	-4.10961	-0.930689	0.00172736		mt-Co3	7.83918	0.532482	1.22032e-12
Samd1	2.22153	0.301861	0.0724827		Syt1	1	20.0224	0.555676		2010009K17Rik	1	20.1325	0.564014		Rsf1	4.44523	0.561121	0.000376701		Gpr132	-5.87373	-1.25228	2.4113e-07		Hsp90ab1	-5.05583	-0.43703	2.09897e-05		Il4ra	7.88169	1.12494	4.32409e-13		Prnp	5.29125	1.49389	6.27166e-06		Pnrc2	4.10793	0.628817	0.00172736		Chchd2	7.83839	0.686131	1.08571e-12
Utp18	2.22151	0.242385	0.0724827		Gm10010	1	20.0224	0.555676		Igf1	1	20.1325	0.564014		Psmb1	4.43563	0.281655	0.000389517		Macf1	-5.8687	-0.711196	2.46988e-07		Psmb4	-5.05302	-0.556842	2.07361e-05		Clta	7.88072	0.640045	4.13599e-13		Tcp1	5.29116	0.62304	6.03267e-06		Filip1l	-4.10596	-1.15061	0.00175863		Rab2a	7.82028	0.996725	1.44076e-12
Tbca	2.21811	0.103146	0.0729943		Amotl1	1	20.0224	0.555676		Ttc39a	1	20.1325	0.564014		Herc1	4.43264	0.561856	0.000396001		Ppp3ca	-5.86587	-1.23319	2.52982e-07		Phgdh	-5.04967	-0.933126	2.17552e-05		Fam173a	7.88053	0.82065	4.01556e-13		Naa10	5.28881	0.745175	6.13379e-06		Prmt7	-4.10489	-1.58606	0.0017781		Mrps21	7.80947	1.01217	1.53874e-12
Nkd2	2.21306	1.63366	0.0738408		Col4a2	1	20.0224	0.555676		Serping1	1	21.1325	0.564014		Hspb11	4.43243	0.785373	0.000395823		Trib2	-5.86365	-1.30612	2.63264e-07		Cdk4	-5.04776	-0.808756	2.15424e-05		Hectd1	7.8768	1.00691	4.58745e-13		Zwint	5.28292	0.816553	6.32014e-06		Lcp1	4.10146	0.337125	0.00176492		Ptp4a2	7.80564	0.871598	1.43656e-12
A930029G22Rik	2.20388	0.718503	0.0752017		Gm16275	1	20.0224	0.555676		D630003M21Rik	1	20.1325	0.564014		Trpm7	4.42817	0.68978	0.000401813		Hnrnpab	-5.8571	-0.819403	2.69316e-07		Tbrg1	-5.03504	-0.563989	2.24557e-05		Mbd2	7.8739	0.734509	4.1544e-13		Chmp4b	5.28098	0.490354	6.27166e-06		Klc3	4.0989	1.21901	0.00180284		Tmed2	7.79831	0.88514	1.69073e-12
Slc30a4	2.20338	1.82631	0.0753039		Thbs4	1	20.0224	0.555676		Abra	1	20.1325	0.564014		Tnfsf8	4.42363	0.794264	0.000408485		Nol7	-5.85649	-0.615679	2.56231e-07		Cct8	-5.02942	-0.530422	2.34706e-05		P2ry10	7.86611	1.18344	4.7027e-13		Malt1	5.27844	1.15613	6.50076e-06		Esf1	-4.0972	-0.854475	0.00180683		Eif3i	7.79485	0.95726	1.67317e-12
Mars2	2.20117	0.572549	0.0755844		Spata21	1	20.0224	0.555676		Cbr3	1	20.1325	0.564014		Smg1	4.42104	0.546872	0.000412576		Lta4h	-5.85538	-1.04949	2.65874e-07		Zmat2	-5.02087	-0.749286	2.41148e-05		Cbx7	7.86398	1.00334	4.58911e-13		Mrps21	5.27519	0.557649	6.47705e-06		Nop14	-4.08767	-0.993282	0.00187736		Syf2	7.79251	0.849124	1.63275e-12
Mtss1	2.20071	0.559313	0.0756623		Gm5248	1	20.0224	0.555676		4921513D11Rik	1	20.1325	0.564014		Atf7ip	4.41958	0.452643	0.000415191		Etnk1	-5.85476	-0.912716	2.60835e-07		Top1	-5.01474	-0.527798	2.46825e-05		Ucp2	7.86378	0.664269	4.32316e-13		Atp6v0e	5.27121	0.431807	6.54468e-06		Hspd1	-4.08683	-0.706686	0.0019154		Rer1	7.78619	0.938453	1.82795e-12
Timm9	2.19093	0.32347	0.0772706		Pagr1b	1	20.0224	0.555676		Gm15759	1	20.1325	0.564014		Mbnl3	4.41828	1.37476	0.000422754		Dnaja1	-5.84821	-0.524622	2.69472e-07		Polr2g	-5.00598	-0.641476	2.56762e-05		Zbtb7a	7.86058	0.931486	4.6528e-13		Ubb	5.26777	0.309535	6.68179e-06		Ptges3	-4.08647	-0.548723	0.00187617		Pon2	7.78429	1.25115	1.82795e-12
Adpgk	2.17461	0.347873	0.0800211		Rhpn2	1	20.0224	0.555676		Slamf9	1	20.1325	0.564014		Gatad2b	4.41507	0.485615	0.000421872		Cdc42se2	-5.84734	-0.597926	2.67492e-07		H2-T22	-5.00568	-0.469883	2.57446e-05		Arhgdib	7.85367	0.553156	4.63058e-13		Cops6	5.26066	0.653967	6.91761e-06		Rcn1	-4.08616	-1.0258	0.00187736		Bag1	7.78379	1.0769	1.8582e-12
S1pr4	2.16913	0.178995	0.0809509		Slc6a19	1	20.0224	0.555676		Gm34882	1	20.1325	0.564014		Gimap8	4.41321	0.456673	0.000424284		Bach2	-5.84001	-1.88392	2.94984e-07		Tigd2	-5.0049	-0.780405	2.58207e-05		Msn	7.85355	0.703206	5.03143e-13		Hnrnpd	5.2559	0.605568	7.07602e-06		Fam162a	-4.07884	-0.888497	0.00193515		Anxa2	7.7832	3.89823	5.58231e-12
Aqp11	2.16676	1.82631	0.0814222		Pigz	1	20.0224	0.555676		Epgn	1	20.1325	0.564014		Rasal3	4.40353	0.457284	0.000444198		Ikbkb	-5.83926	-0.823794	2.8154e-07		Tiam1	-5.00334	-0.922992	2.67204e-05		Gimap9	7.84827	0.721722	4.9554e-13		Zfp36	5.25394	1.08379	7.65949e-06		Ehd3	-4.07119	-1.65643	0.00201349		Sec61g	7.78221	0.770209	1.67906e-12
Hs3st3b1	2.16283	0.8895	0.0821187		Gm21972	1	20.0224	0.555676		Gm37787	1	20.1325	0.564014		Slc22a2	4.39682	1.80536	0.000463901		Set	-5.83402	-0.633118	3.06134e-07		Ms4a4c	-4.9926	-2.29551	2.97145e-05		Sema4d	7.83172	0.975575	5.76788e-13		Plscr1	5.25126	1.14968	7.3861e-06		Eif4e3	4.06769	0.905661	0.00199671		Psmb8	7.76581	0.689684	2.09204e-12
Rhob	2.15992	0.485624	0.0826121		Gm13179	1	20.0224	0.555676		Fcrla	1	20.1325	0.564014		Erbb2ip	4.39665	0.573781	0.000454075		Adh5	-5.83174	-0.851502	2.95398e-07		Commd3	-4.98761	-0.760546	2.82417e-05		Vasp	7.8308	0.72633	5.66429e-13		Fth1	5.246	0.304143	7.44417e-06		Tnfaip8	4.06571	0.48224	0.00200251		Eno1	7.76544	1.09331	2.38409e-12
Gm13830	2.15991	1.31173	0.082625		Sh3tc2	1	20.0224	0.555676		Gm10631	1	20.1325	0.564014		Npc2	4.3881	0.330261	0.000468771		Gm37387	-5.82362	-2.8323	3.48498e-07		Mbd3	-4.97831	-0.747706	2.95703e-05		Jakmip1	7.82464	0.928739	5.93066e-13		Ptpn5	5.24429	2.72602	8.30813e-06		Hmgn1	-4.05755	-0.677871	0.00208052		Capza1	7.76388	1.13955	2.34026e-12
Arhgap29	2.15861	2.6743	0.0829326		Chrm4	1	20.0224	0.555676		Kcnj9	1	20.1325	0.564014		Rundc3a	4.38628	1.01219	0.000472443		Pydc3	-5.81568	-1.84814	3.49805e-07		Ddt	-4.97546	-0.817501	2.97145e-05		Atp5l	7.8204	0.601272	5.837e-13		Apbb1ip	-5.24363	-0.577788	7.45041e-06		Prdx1	4.05598	0.386577	0.00207798		Eif3m	7.74295	0.80357	2.25087e-12
Stk26	2.15825	0.32	0.0829035		Gm15239	1	20.0224	0.555676		Enpep	1	20.1325	0.564014		Ppm1b	4.38621	0.554578	0.000472443		Rab3ip	-5.81022	-1.53643	3.49805e-07		Ppa1	-4.9749	-1.15524	3.09616e-05		Fam32a	7.82015	0.867215	6.24708e-13		Csnk2b	5.24026	0.624418	7.67742e-06		Sytl2	4.05463	1.16097	0.00211663		Sars	7.73419	1.1551	2.63227e-12
Gm33994	2.15648	0.793884	0.0831707		Foxg1	1	20.0224	0.555676		Gm16262	1	20.1325	0.564014		Dcaf8	4.38618	0.543976	0.000472443		Pfdn6	-5.80566	-0.80987	3.43138e-07		Snrpb	-4.97437	-0.473593	3.01592e-05		Chd8	7.81583	1.05794	6.55211e-13		Hopx	5.23098	0.741861	8.12925e-06		Tsc22d3	-4.04091	-0.600928	0.00221552		1810037I17Rik	7.73305	0.998925	2.79443e-12
Ms4a6c	2.1464	0.301674	0.0850577		Tdrd5	1	20.0224	0.555676		Cacna1b	1	21.1325	0.564014		Vav1	4.38566	0.590245	0.000472443		Rras2	-5.80144	-2.46888	3.86648e-07		Psmb6	-4.97134	-0.525345	3.01592e-05		Arid1a	7.80886	0.832921	6.81105e-13		Glrx3	5.22341	0.630457	8.25941e-06		Ube2r2	4.04084	0.530803	0.00219884		Tbca	7.71639	0.852908	2.87241e-12
Usp2	2.14452	1.47267	0.0854548		Nrxn3	1	20.0224	0.555676		Mst1r	1	20.1325	0.564014		Synrg	4.38158	0.671044	0.000479292		Ppp1r18	-5.78871	-0.57988	3.69255e-07		Mrps16	-4.9686	-0.584902	3.04884e-05		Exosc8	7.80495	0.845617	6.69739e-13		Sar1b	5.22278	0.670927	8.29568e-06		Arpc4	4.03968	0.418943	0.00219884		Atp6v1d	7.71513	1.14505	3.02068e-12
Prkd2	2.14323	0.160286	0.0856387		Smoc2	1	20.0224	0.555676		4930444A19Rik	1	20.1325	0.564014		PISD	4.38072	0.463689	0.000480879		Limd2	-5.78798	-0.405218	3.68752e-07		Psmb5	-4.95972	-0.540164	3.17751e-05		Hcls1	7.79182	0.786464	7.01976e-13		Casp1	5.21864	0.949844	8.55443e-06		Gsn	4.03448	1.28128	0.00225468		Gabarapl2	7.71423	0.922229	2.83559e-12
Klf3	2.1384	0.1572	0.0864572		Arhgef17	1	20.0224	0.555676		Gng7	1	20.1325	0.564014		Ms4a4c	4.37755	1.0222	0.000486408		Gata1	-5.77484	-4.59339	4.85219e-07		Psmb9	-4.9592	-0.451595	3.15726e-05		Slamf1	7.79169	1.15215	7.63225e-13		Ltb	5.21838	0.392007	8.44832e-06		Gm16152	-4.03444	-1.82906	0.00229089		2700094K13Rik	7.71186	1.85655	5.98402e-12
Phf20l1	2.13336	0.17158	0.0872792		Dnah9	1	20.0224	0.555676		Smtnl2	1	20.1325	0.564014		Rapsn	-4.37724	-2.74553	0.000505574		Hmha1	-5.77441	-0.409673	3.94168e-07		Prmt1	-4.95817	-0.800455	3.24168e-05		Gnb2	7.79075	0.678144	7.01976e-13		Arf1	5.21265	0.462083	8.64886e-06		Stk40	4.03423	0.845862	0.00224725		Sumo1	7.71086	0.792641	2.70869e-12
Lss	2.1323	0.667876	0.0874892		Vwc2	1	20.0224	0.555676		Ltf	1	20.1325	0.564014		Cspp1	4.37353	0.712821	0.000494693		Bzw2	-5.76727	-0.95158	4.22805e-07		Hsbp1	-4.95225	-0.584986	3.25425e-05		Arhgap9	7.78734	0.821336	7.81373e-13		S100a10	5.20726	0.578902	8.83464e-06		Dennd2d	-4.01519	-1.07826	0.00243864		Ndufb9	7.70781	0.89043	2.81218e-12
Kat2a	2.12784	0.330412	0.0883384		Gm12292	1	20.0224	0.555676		Wdr49	1	20.1325	0.564014		Msn	4.3725	0.338357	0.000494693		Pa2g4	-5.76362	-1.11566	4.64372e-07		Edf1	-4.9489	-0.448019	3.31005e-05		Rabgap1l	7.78412	0.852215	7.7171e-13		Sccpdh	5.20389	2.33366	9.80489e-06		Tmem59	4.01331	0.375462	0.00242622		Rasa3	7.70516	1.9189	4.73502e-12
Slc7a1	2.12706	0.369003	0.0884809		Gm5602	1	20.0224	0.555676		Emp2	1	20.1325	0.564014		Stk4	4.36328	0.435578	0.000512633		Uqcrc2	-5.76129	-0.687088	4.2864e-07		Nap1l1	-4.94773	-0.778171	3.41191e-05		Il10rb	7.76811	0.981682	8.83022e-13		Snrpa1	5.19664	0.772593	9.37737e-06		Srpk1	-4.01167	-0.481499	0.00244782		Il18r1	7.69402	2.12079	4.91568e-12
Sema7a	2.1257	2.18888	0.0888055		Tomt	1	20.0224	0.555676		Gm15261	1	20.1325	0.564014		Ogt	4.36038	0.327213	0.000517209		Pop5	-5.75441	-0.738761	4.432e-07		Tspan32	-4.94502	-0.362952	3.35993e-05		Rhoa	7.76744	0.562003	8.44826e-13		Bcor	5.19016	1.04209	9.88226e-06		Cd3eap	-4.00592	-2.15787	0.00256933		Dgka	7.68812	0.934546	3.25288e-12
Ptpn18	2.1215	0.0668748	0.0895268		Gm16229	1	20.0224	0.555676		Rab17	1	20.1325	0.564014		Map4k2	4.35269	0.558605	0.000536361		Psma4	-5.74885	-0.655711	4.71189e-07		Itgal	-4.94334	-0.638088	3.42162e-05		Tpp2	7.76307	0.938098	8.91856e-13		mt-Nd1	5.18847	0.336977	9.73189e-06		Snrpd3	-4.00035	-0.567752	0.00256933		Ndufv3	7.68617	1.02799	3.96823e-12
Focad	2.11583	0.664555	0.0906326		Gm11534	1	20.0224	0.555676		Gas6	1	20.1325	0.564014		Prkacb	4.34793	0.537958	0.000546366		Snhg6	-5.74443	-1.23836	4.85219e-07		Ppm1b	-4.93286	-0.838992	3.57872e-05		Xiap	7.76266	0.907765	8.83022e-13		Pdia3	5.18251	0.485336	9.99689e-06		Gpr155	3.99802	1.53165	0.00261157		Rtn3	7.68446	1.34551	3.90402e-12
Twf2	2.11118	0.123735	0.0914719		Nkx6-2	1	20.0224	0.555676		RP23-106P7.5	1	20.1325	0.564014		Supt4a	4.34458	0.303164	0.000551135		Wdr43	-5.73963	-1.15635	5.05406e-07		Psmc5	-4.92385	-0.661441	3.75336e-05		Zmiz1	7.76106	1.13883	9.5204e-13		Ube2d3	5.17995	0.374175	1.00357e-05		Sla2	3.99771	0.736279	0.0025704		Sdhd	7.68428	1.30255	3.93126e-12
Add1	2.10987	0.190232	0.0917145		Cxcl9	1	20.0224	0.555676		Tmem236	1	20.1325	0.564014		Nipbl	4.33806	0.441625	0.000567364		Snrpd1	-5.73503	-0.859096	5.21902e-07		Pdia3	-4.92058	-0.459804	3.79367e-05		Cdc42	7.75576	0.59894	8.86954e-13		Reep3	5.17664	0.913256	1.03687e-05		Lap3	-3.99263	-1.62742	0.00267		Cdkn2d	7.67007	1.55153	5.12921e-12
Bola2	2.10968	0.125374	0.0917441		Sugct	1	20.0224	0.555676		Gm648	1	20.1325	0.564014		Prdm2	4.33226	0.658566	0.000582635		St8sia6	-5.731	-1.76797	5.21902e-07		Ttc3	-4.918	-1.08823	3.82801e-05		Ctsd	7.75088	0.783523	9.50129e-13		Hsbp1	5.17627	0.548477	1.02461e-05		Tstd3	3.99206	1.24625	0.00264224		Fam103a1	7.6651	1.17165	4.3132e-12
Rtcb	2.10475	0.154191	0.0925555		Matn4	1	20.0224	0.555676		RP23-378L12.3	1	20.1325	0.564014		Lilrb4a	-4.32697	-2.0582	0.000609397		Nsmce1	-5.72327	-0.872054	5.21902e-07		Llph	-4.91438	-0.563149	3.85699e-05		Gpatch8	7.74904	0.989268	9.96184e-13		Myo1e	5.17573	1.44591	1.05426e-05		Eif4ebp1	3.98682	1.03909	0.00268399		Limd2	7.65424	0.700542	4.23452e-12
Gabrr2	2.10286	0.62776	0.0929167		Myoz1	1	20.0224	0.555676		Omg	1	20.1325	0.564014		Tnfrsf1b	-4.32481	-0.723433	0.000603427		Nin	-5.72243	-1.30849	5.35623e-07		Mier1	-4.9073	-0.568369	3.99165e-05		Rc3h2	7.7454	1.14601	1.11646e-12		Ptms	5.16858	0.81322	1.06358e-05		Dph5	-3.98205	-0.998334	0.00271572		Cdc42ep3	7.64254	1.44947	5.50799e-12
Bdh1	2.1008	0.319731	0.0933384		4930487D11Rik	1	20.0224	0.555676		Gm33533	1	20.1325	0.564014		Dock11	4.31694	0.672856	0.000618332		Eif3l	-5.72223	-0.894051	5.30715e-07		Lef1	-4.90525	-0.686935	4.041e-05		Ncf4	7.74167	1.02592	1.0858e-12		Tm9sf3	5.16801	0.59089	1.06558e-05		Sccpdh	3.98071	1.99242	0.00279708		Ube2h	7.63985	1.19204	5.14504e-12
A630014C17Rik	2.09961	1.5462	0.0935771		Gm5868	1	20.0224	0.555676		Rdh16	1	20.1325	0.564014		Prpf4b	4.31669	0.486648	0.000618332		Tap1	-5.72085	-0.586418	5.30715e-07		Hmgn3	-4.90268	-2.6182	4.41454e-05		Limd2	7.74107	0.533013	9.98594e-13		Gadd45b	5.16613	1.71165	1.16901e-05		Lgmn	3.97779	2.29584	0.00286233		Anxa11	7.63842	1.29915	5.18151e-12
Glul	2.09825	0.30836	0.0937976		Tmprss11d	1	20.0224	0.555676		Gm11715	1	20.1325	0.564014		Bod1l	4.31532	0.43046	0.000620489		Ndufb9	-5.71438	-0.578029	5.43802e-07		Bptf	-4.89627	-0.513683	4.17142e-05		Ube2i	7.73737	0.66614	1.04984e-12		Dnajc1	5.16572	0.740022	1.07698e-05		Crem	3.977	1.03935	0.00277275		Gng5	7.63646	0.659718	4.30957e-12
Dkc1	2.09544	0.202832	0.0943648		Cyp2t4	1	20.0224	0.555676		BC048546	1	20.1325	0.564014		Arap2	4.31463	0.613948	0.000621107		Glrx3	-5.71054	-0.777317	5.64784e-07		Slfn2	-4.88534	-0.437995	4.47361e-05		Tgoln1	7.73198	1.05428	1.12693e-12		Psmc2	5.16348	0.580984	1.07994e-05		Cyfip1	3.9769	0.722337	0.00275735		Psmb4	7.63478	1.0162	5.33243e-12
Dirc2	2.09379	0.372734	0.0946682		Folr2	1	20.0224	0.555676		Hoxb9	1	20.1325	0.564014		Trmt112	4.31225	0.36699	0.000624756		Anp32a	-5.7096	-0.416555	5.55456e-07		Ubtf	-4.87477	-0.692568	4.64171e-05		Dock8	7.72767	0.95366	1.15569e-12		Srsf3	5.16333	0.438234	1.07698e-05		Foxk1	-3.97613	-1.56741	0.00280782		Ube2n	7.63473	1.0451	4.59218e-12
Rgcc	2.09365	0.544163	0.0946846		Ighv6-4	1	20.0224	0.555676		Pcp2	1	20.1325	0.564014		Klrg1	-4.31189	-3.68413	0.000653204		Hopx	-5.69886	-0.839061	6.19995e-07		Rdx	-4.8681	-0.686261	4.76941e-05		Scand1	7.72745	0.65209	1.12884e-12		Fkbp1a	5.16168	0.518638	1.08629e-05		Sdad1	-3.97075	-1.49225	0.00286233		Glmp	7.63389	1.19213	4.80872e-12
Tlr6	2.08951	0.807447	0.0954748		Hoxc4	1	20.0224	0.555676		2700068H02Rik	1	20.1325	0.564014		Frmd8	4.30871	0.483641	0.000635023		Tbxa2r	-5.69789	-1.33144	6.13278e-07		Ppib	-4.86469	-0.39707	4.87524e-05		Ifi203	7.7257	0.727405	1.15156e-12		2210016F16Rik	5.1613	0.767957	1.08935e-05		Grwd1	-3.96913	-2.23571	0.00289507		Pdia3	7.61776	0.86938	5.20495e-12
Selplg	2.08817	0.094904	0.0957459		Gm20404	1	20.0224	0.555676		Asap3	1	20.1325	0.564014		Sash3	4.30754	0.416646	0.000635023		S1pr4	-5.69008	-1.03863	6.28319e-07		Dap3	-4.86021	-0.750716	4.94687e-05		Tm9sf3	7.72295	0.808309	1.12223e-12		Manf	5.15786	0.593557	1.10452e-05		Mbnl1	3.96862	0.27196	0.00282218		Fnbp1	7.61626	1.04798	5.06786e-12
Zfp120	2.08432	0.282274	0.0964362		Tesk2	0.99899	0.526135	0.55613		Mgat3	1	20.1325	0.564014		Trim5	4.30752	0.64891	0.000635023		Pak2	-5.68469	-0.548839	6.28319e-07		Tmem59	-4.85517	-0.470034	5.05268e-05		Cst3	7.72272	0.828259	1.14788e-12		Cox7b	5.15013	0.467215	1.14592e-05		Rab1a	3.95999	0.713675	0.0029049		Arl5c	7.61469	1.35024	6.88566e-12
Bri3	2.07942	0.142289	0.0975023		Gm26583	0.995792	0.316417	0.558416		Agmat	1	20.1325	0.564014		Wdyhv1	4.30553	0.776806	0.000642093		Scand1	-5.68139	-0.504788	6.36814e-07		Cd247	-4.8496	-0.56399	5.16913e-05		Fau	7.71966	0.400556	1.16039e-12		Ifi27	5.14741	0.56034	1.16357e-05		Parp8	-3.95929	-2.72215	0.00301659		Psenen	7.60603	0.848742	5.74825e-12
Gm13091	2.07631	0.600746	0.0981484		B3galt5	0.994197	0.69606	0.558694		Syde2	1	20.1325	0.564014		Gm37387	4.30515	0.987405	0.00064257		Cox6a1	-5.68123	-0.589742	6.47125e-07		Fubp1	-4.84709	-0.49556	5.26797e-05		Shfm1	7.71243	0.600653	1.21312e-12		Aebp2	5.14073	0.800431	1.2124e-05		Fli1	3.9589	0.618068	0.0029049		Kxd1	7.59805	1.27932	6.9295e-12
Atp13a3	2.07521	0.206367	0.0983667		Trav14d-3-dv8	0.988869	1.43303	0.561616		Slco4c1	1	20.1325	0.564014		Thap3	4.3002	0.468244	0.000650528		Hspd1	-5.6799	-0.945642	7.05209e-07		Chchd1	-4.84259	-0.673433	5.34781e-05		Zmynd11	7.71126	1.14419	1.36567e-12		Ahr	5.14046	1.30867	1.25804e-05		Cox17	3.95838	0.434591	0.0029049		Ppia	7.59676	0.689887	6.07449e-12
Ube2d1	2.0696	0.239989	0.0994		Arid3a	0.988582	0.274596	0.561632		Nwd2	1	20.1325	0.564014		Xpo6	4.29882	0.544278	0.000653204		Atp5j	-5.67785	-0.462865	6.58907e-07		Abcb9	-4.84046	-1.15964	5.46763e-05		Sh3bgrl	7.71003	1.08774	1.34994e-12		Mapre1	5.13644	0.598661	1.22351e-05		Lilrb4a	3.95722	1.3179	0.00293652		Tmod3	7.59391	1.468	7.30565e-12
Pifo	2.06321	2.63366	0.100774		Col15a1	0.982702	0.424758	0.565553		Ankdd1b	1	20.1325	0.564014		Mbp	4.29631	0.592615	0.000658948		Hnrnpm	-5.67479	-0.635366	6.58861e-07		Ube2d3	-4.84017	-0.356507	5.37935e-05		Ep300	7.70876	1.12795	1.42296e-12		Tbc1d30	5.13479	1.40228	1.2561e-05		Hbs1l	3.94938	0.994522	0.00302512		Cmas	7.59373	1.67705	8.01859e-12
Wnt5b	2.05539	4.14823	0.102304		Thsd1	0.979862	2.1111	0.565867		Greb1	1	20.1325	0.564014		Tnip1	4.29549	0.504726	0.000658948		Dock2	-5.66769	-0.608936	6.89619e-07		Dusp6	-4.83845	-3.6411	5.91656e-05		Ndufa4	7.70684	0.597566	1.21312e-12		Txn1	5.12565	0.630202	1.28919e-05		Ndufv3	3.94529	0.415712	0.00303947		Tpst2	7.59342	1.19779	6.91807e-12
1700040D17Rik	2.05539	4.14823	0.102304		Gm37245	0.979862	2.1111	0.565867		Gm11537	1	20.1325	0.564014		Themis	4.29151	1.18408	0.000674638		Pin4	-5.66683	-0.846131	6.88716e-07		Supt4a	-4.83103	-0.410483	5.59515e-05		Hnrnpd	7.70568	0.830302	1.24235e-12		Slc7a10	5.1253	2.24422	1.36111e-05		Coro2b	3.94311	2.32966	0.00314998		Tonsl	7.59089	0.86318	6.00143e-12
Adh5	2.05274	0.144582	0.102682		Gm26848	0.979862	2.1111	0.565867		Traj32	1	20.1325	0.564014		Ltb	4.28894	0.265958	0.000674638		Rasa3	-5.66354	-1.58743	7.36969e-07		Kcnn4	-4.83099	-0.551827	5.59477e-05		Prrc2a	7.70555	0.916838	1.27746e-12		Cd274	5.12333	1.21859	1.32491e-05		Rab37	3.94176	0.590067	0.00308576		Mndal	7.58709	0.903482	6.34995e-12
Sfxn2	2.04975	0.466978	0.103326		Fcer2a	0.979862	2.1111	0.565867		Kcnu1	1	20.1325	0.564014		Slc6a6	4.28386	0.647258	0.000691349		Tbrg1	-5.66131	-0.627501	7.10879e-07		Chd3	-4.83097	-0.386004	5.59477e-05		Pum2	7.69167	0.956294	1.57325e-12		Rgs3	5.12117	0.878178	1.31929e-05		Hirip3	-3.94122	-2.08711	0.00318907		Dynll1	7.58219	0.91091	6.94403e-12
Acvrl1	2.04917	1.08934	0.103472		Prr15	0.979862	2.1111	0.565867		Gm42691	1	20.1325	0.564014		Mical3	4.28366	0.924413	0.000691656		Ms4a6c	-5.65868	-2.0714	7.80901e-07		Foxn3	-4.82782	-0.797103	5.69699e-05		Bmp7	7.69065	1.37239	1.5795e-12		Psma5	5.1	0.639449	1.4604e-05		Socs3	3.93988	0.691652	0.00311049		Cd2	7.57774	0.670512	5.99689e-12
Gstk1	2.04871	0.587901	0.103537		Trav6-3	0.979862	2.1111	0.565867		Fgf17	1	20.1325	0.564014		Prdx1	-4.27581	-0.384047	0.00071623		Acin1	-5.65012	-0.652688	7.48493e-07		Ndufc1	-4.82528	-0.664561	5.76955e-05		Prdm1	7.68884	1.79105	1.61116e-12		Ebi3	5.09081	1.31265	1.56408e-05		Utp18	-3.92825	-1.00668	0.00326499		Rab8a	7.57684	1.12516	7.30565e-12
Impdh1	2.04409	0.24558	0.104426		Fam169a	0.979862	2.1111	0.565867		D330020A13Rik	1	20.1325	0.564014		Pacsin1	4.27246	0.600846	0.000721266		Gtf3a	-5.64235	-0.96705	7.92395e-07		Pgls	-4.82049	-0.601547	5.86336e-05		Gng5	7.68382	0.516815	1.42296e-12		Ucp2	5.0865	0.465855	1.5542e-05		Il10ra	3.92524	0.842526	0.00326499		Cyfip2	7.57062	1.17836	7.26721e-12
Ccnd2	2.02793	0.107385	0.107794		Slc4a5	0.979862	2.1111	0.565867		Gm11008	1	20.1325	0.564014		Foxp3	-4.26518	-0.567564	0.000746252		Tmem71	-5.62909	-1.44553	8.76702e-07		Usp18	-4.81922	-2.09082	6.26957e-05		Traf3ip3	7.68129	0.694486	1.53776e-12		Ndufc2	5.08586	0.554647	1.54912e-05		Trpm4	3.92497	1.44226	0.00328463		Psma2	7.56051	0.85582	7.6596e-12
Star	2.02669	0.937337	0.108031		Gm16214	0.979862	2.1111	0.565867		Gm26632	1	20.1325	0.564014		Scml4	4.26509	0.793989	0.000744609		Myl6	-5.62575	-0.42159	8.67115e-07		Acap1	-4.81005	-0.633943	6.1154e-05		Cntrl	7.68057	1.06453	1.62436e-12		Ndufb6	5.08422	0.700264	1.56331e-05		Llph	-3.92427	-0.47211	0.00327289		Mien1	7.54746	1.1772	1.1151e-11
Pip4k2a	2.02348	0.231537	0.108723		Ptgr1	0.979862	2.1111	0.565867		Gm26912	1	20.1325	0.564014		Thada	4.25856	0.904558	0.000764407		AY036118	-5.62531	-0.511789	8.43846e-07		Ppp1ca	-4.8097	-0.4201	6.17577e-05		Supt20	7.67882	0.937226	1.61116e-12		Hacd3	5.08389	1.00849	1.579e-05		Aes	3.92377	0.252267	0.00326499		Higd2a	7.54339	1.15144	8.69026e-12
Arhgef33	2.01363	1.70077	0.110985		C1qc	0.979862	2.1111	0.565867		Pcdh15	1	20.1325	0.564014		Lgals1	-4.25547	-0.99896	0.000798561		Hnrnpk	-5.62306	-0.426595	8.67115e-07		Pptc7	-4.80909	-1.16682	6.1964e-05		Supt5	7.67833	1.02402	1.616e-12		Sar1a	5.08166	0.736691	1.58355e-05		Hsp90b1	3.9234	0.438196	0.00326499		Txndc5	7.51878	2.20244	1.54341e-11
Tbc1d16	2.01081	0.64286	0.111512		Gm44036	0.979862	2.1111	0.565867		Gm12694	1	20.1325	0.564014		Nrd1	4.25546	0.517431	0.000771362		Abracl	-5.61741	-0.532672	9.04316e-07		Morf4l1	-4.80874	-0.408375	6.15044e-05		Irf2bpl	7.67648	0.932228	1.62446e-12		Gt(ROSA)26Sor	5.06718	1.20687	1.73599e-05		Bmyc	-3.92339	-0.75035	0.00328463		Eef1a1	7.51217	0.61315	9.8633e-12
Smad4	2.00466	0.194508	0.112767		Gapdhs	0.979862	2.1111	0.565867		Gm43972	1	20.1325	0.564014		Smc3	4.25242	0.488401	0.000778456		Phb2	-5.61224	-0.723125	9.40863e-07		Ndufb6	-4.80769	-0.792394	6.1761e-05		Sec11c	7.67633	0.806237	1.59407e-12		Atp6v1f	5.06513	0.446847	1.70023e-05		mt-Co3	-3.92185	-0.205853	0.00328463		H2afv	7.51044	1.26397	1.75147e-11
Mmp11	1.99906	0.69855	0.113902		Gm44205	0.979862	2.1111	0.565867		Gm38335	1	20.1325	0.564014		Phip	4.25239	0.441601	0.000779014		Sumo1	-5.60999	-0.494891	9.18576e-07		Ppp1r14b	-4.79989	-0.660553	6.54808e-05		Ppp2ca	7.66833	0.755431	1.66025e-12		Timm17b	5.06158	0.774974	1.73599e-05		Tm9sf2	3.91326	0.598442	0.00337606		Arl6ip5	7.50673	0.872539	1.01978e-11
Gm7967	1.99888	0.930142	0.113922		Gm26822	0.979862	2.1111	0.565867		Sulf1	1	20.1325	0.564014		Cyth1	4.24553	0.474247	0.000798561		Il7r	-5.60945	-0.781006	9.34934e-07		Taf10	-4.79796	-0.447279	6.4522e-05		Polr2m	7.6682	0.836559	1.62117e-12		Top1	5.05909	0.4994	1.74906e-05		H3f3b	3.90876	0.25405	0.00342419		Ssr4	7.50249	0.905505	1.01418e-11
Chd3	1.99701	0.0828151	0.114346		Slain1os	0.979862	2.1111	0.565867		4930595D18Rik	1	20.1325	0.564014		Gm9843	4.23923	0.437843	0.000817148		Socs1	-5.60913	-1.00217	9.40309e-07		Cox5a	-4.79667	-0.486765	6.5417e-05		Eif3f	7.66814	0.529549	1.616e-12		Map1lc3b	5.05664	0.457713	1.76845e-05		Nt5e	3.9065	0.540202	0.00344981		Fyb	7.50068	0.720041	1.08741e-11
Smg1	1.99346	0.164966	0.115125		Gm12524	0.979862	2.1111	0.565867		Igkv10-96	1	20.1325	0.564014		Ifi203	4.23799	0.338451	0.000819645		Ostf1	-5.6058	-0.851568	9.40863e-07		Npepps	-4.78741	-1.03439	6.7648e-05		Crlf2	7.66386	0.928266	1.70317e-12		Tbxa2r	-5.05226	-1.22401	1.83669e-05		Cers4	3.90625	0.614955	0.00345358		Maf	7.49793	1.10417	1.01038e-11
Cyp51	1.99172	0.352637	0.115565		Gm7879	0.979862	2.1111	0.565867		Zfp647	1	20.1325	0.564014		Slc44a2	4.23308	0.559392	0.000838895		Ndufa8	-5.6055	-0.683524	9.40309e-07		Prkch	-4.78429	-0.657919	6.81621e-05		Calm1	7.6627	0.589396	1.66025e-12		Gnaq	5.05176	1.10326	1.83477e-05		Tmsb4x	3.90136	0.216	0.00351036		Gng2	7.48988	1.47303	1.55238e-11
Znrf1	1.98722	0.133815	0.116439		Fn3k	0.979862	2.1111	0.565867		6330409D20Rik	1	20.1325	0.564014		Rbm6	4.22616	0.496527	0.000860221		Nop58	-5.60421	-1.16959	1.01288e-06		Commd4	-4.78131	-0.706918	6.87702e-05		Ttc14	7.65982	0.731332	1.76027e-12		Higd1a	5.04317	0.642296	1.88293e-05		Ctla2b	3.89962	2.77139	0.00368061		Msrb1	7.47414	1.68472	1.62054e-11
Gm9843	1.98627	0.139209	0.116667		Hsd3b7	0.979862	2.1111	0.565867		Clec4n	1	21.1325	0.564014		Jmjd1c	4.22417	0.529407	0.000869036		Tceb2	-5.60325	-0.388366	9.53812e-07		Emp3	4.77994	0.40304	6.84179e-05		Ikzf3	7.65612	1.15797	1.93747e-12		Ppip5k2	5.04174	1.17426	1.93458e-05		Itgb2	3.89719	0.411112	0.00355472		Gltp	7.47094	0.916348	1.28629e-11
Ttyh3	1.98627	0.291359	0.116667		Tff3	0.979862	2.1111	0.565867		Pilra	1	20.1325	0.564014		Aplp1	-4.21925	-1.48322	0.000890334		Gm20696	-5.60275	-2.777	1.06018e-06		Ndufa3	-4.77841	-0.470133	6.92215e-05		Ccnd2	7.6423	0.775442	2.02216e-12		Luc7l2	5.03722	0.480212	1.92488e-05		Ltb4r1	3.89547	2.80431	0.00368376		Tesc	7.47006	1.41498	1.76802e-11
Surf2	1.98294	0.239896	0.117311		Zfp536	0.979862	2.1111	0.565867		Ghrl	1	20.1325	0.564014		Tiam1	4.21835	0.620312	0.000890334		Ssbp2	-5.60231	-0.824615	9.43978e-07		Pam16	-4.77435	-0.975466	7.09968e-05		Dbnl	7.64049	0.840534	2.04365e-12		Tmem167	5.0335	0.580297	1.97341e-05		Slc22a15	3.8905	0.999419	0.00364532		Dctn3	7.46634	1.00438	1.35196e-11
Otud1	1.98136	0.49423	0.117681		Gm42421	0.979862	2.1111	0.565867		Dpyd	1	20.1325	0.564014		Pitpnc1	4.21705	0.555176	0.000890334		Kmt2a	-5.59492	-0.603988	9.9164e-07		Etnk1	-4.77374	-0.710764	7.10005e-05		Lpxn	7.64029	0.932281	2.01275e-12		Trim8	5.03341	0.805978	1.97689e-05		Sirt2	3.89033	0.615846	0.00364532		Mvb12a	7.46597	1.40383	1.59928e-11
Naca	1.9804	0.0673029	0.117952		E130102H24Rik	0.979155	0.250501	0.566264		Slurp1	1	20.1325	0.564014		Crebbp	4.21425	0.454762	0.000897621		Pag1	-5.59089	-1.46133	1.0307e-06		Cd7	4.77213	1.26572	7.17986e-05		Anp32a	7.63937	0.567608	2.01254e-12		Arl1	5.0322	0.678764	1.97689e-05		Sdf2	3.89023	0.584117	0.00364532		Capn1	7.45927	1.38651	1.60296e-11
Gucd1	1.97849	0.409779	0.118426		Art2b	0.976356	0.189772	0.568109		Avpr1a	1	20.1325	0.564014		Prkca	4.21371	0.476326	0.000897621		Foxn3	-5.59067	-0.933263	1.02249e-06		Sri	-4.77179	-0.409957	7.12934e-05		4930523C07Rik	7.62645	0.72833	2.22564e-12		4921524J17Rik	5.03066	0.891775	2.00354e-05		Acap1	3.88935	0.476855	0.00364532		Ube2c	7.4587	5.96662	3.5532e-11
Gm15050	1.97269	2.82631	0.119893		Tctex1d4	0.974851	0.888705	0.568393		Vmn1r58	1	20.1325	0.564014		Gpcpd1	4.21282	0.760742	0.000901493		Erh	-5.58967	-0.627424	1.06036e-06		Rer1	-4.76747	-0.494787	7.21853e-05		Irf2	7.62028	0.807837	2.34502e-12		Marcksl1	5.03042	2.75274	2.21035e-05		Zmiz1	3.88866	0.610762	0.0036457		Traf3ip3	7.45727	0.881771	1.5621e-11
Plaur	1.97269	2.82631	0.119893		Prdm5	0.972692	0.437326	0.569305		1700025B11Rik	1	20.1325	0.564014		Kdm7a	4.20805	0.558476	0.000916867		Psmb4	-5.58274	-0.599771	1.06018e-06		Snrpa1	-4.76266	-0.856902	7.492e-05		Itsn2	7.61993	1.1047	2.36186e-12		Igfbp4	-5.02733	-4.01352	2.30053e-05		Tbc1d4	-3.88769	-0.94004	0.00370189		Krtcap2	7.44664	0.911842	1.83706e-11
RP23-213H1.2	1.96866	1.19404	0.120745		Camk2a	0.972015	0.61514	0.569636		Gm20703	1	20.1325	0.564014		Tbca	4.19911	0.31152	0.000950151		Gt(ROSA)26Sor	5.58265	1.35247	1.10254e-06		Uqcrc2	-4.75998	-0.557639	7.50755e-05		Top2b	7.61749	0.879822	2.38269e-12		Tmbim1	5.02249	1.51913	2.13516e-05		Mvb12a	3.87678	0.620546	0.00379387		Gimap1	7.4404	0.678697	1.60296e-11
Setd6	1.96751	0.37641	0.121011		Magi1	0.971618	0.637167	0.569922		Rab40b	1	20.1325	0.564014		Stag1	4.19722	0.535515	0.000957905		Klf6	-5.57562	-0.85837	1.09154e-06		Psmd14	-4.75952	-0.791497	7.54734e-05		Zfp36l1	7.61555	0.97501	2.49528e-12		Eif5b	5.01849	0.620565	2.10167e-05		Sh2b3	-3.87639	-1.42441	0.00386563		Pafah1b1	7.43946	0.983333	1.75147e-11
Trmt10c	1.9654	0.217497	0.121478		Garnl3	0.96884	0.959095	0.570475		Gm5434	1	20.1325	0.564014		Mgea5	4.18776	0.548718	0.000996517		Pgs1	-5.57527	-0.86032	1.08808e-06		Rilpl2	-4.75725	-1.15226	7.9905e-05		Cirbp	7.6095	0.917448	2.53278e-12		Csnk1a1	5.01597	0.476772	2.11229e-05		Prmt5	-3.87091	-1.51575	0.00394208		Eif1	7.43763	0.524077	1.56449e-11
Rasa2	1.96095	0.195427	0.122598		Gm6225	0.965968	1.23663	0.570475		9230105E05Rik	1	20.1325	0.564014		Nav2	-4.18752	-1.31867	0.000997639		Lag3	5.57165	1.59569	1.10254e-06		Myl12a	-4.7522	-0.422868	7.76446e-05		Prpf38b	7.60822	0.874815	2.74879e-12		Bag1	5.01243	0.557449	2.14523e-05		PISD	3.86306	0.462631	0.00398149		Psmd4	7.43499	0.876328	1.60296e-11
Dcun1d2	1.96042	0.351625	0.122716		Gm26899	0.965968	1.23663	0.570475		Pcdhb14	1	20.1325	0.564014		Kif1b	4.18719	0.6397	0.000996623		Ugcg	-5.56715	-1.55397	1.15242e-06		H2-DMa	-4.73472	-0.858937	8.42156e-05		Edem1	7.60105	1.07117	2.71622e-12		G3bp1	5.00812	0.518431	2.18151e-05		Nolc1	-3.86133	-1.13353	0.00406373		Ech1	7.42425	1.16227	2.07822e-11
Rasip1	1.95295	1.26688	0.124661		Gm26660	0.965968	1.23663	0.570475		4930528G23Rik	1	20.1325	0.564014		Etv3	4.18622	0.652229	0.000997639		Ndufa4	-5.56252	-0.454752	1.17102e-06		Psmd8	-4.73106	-0.532021	8.54662e-05		Maz	7.59995	0.813136	2.65515e-12		Sirt2	5.00758	0.746468	2.19997e-05		Gpr107	3.85892	0.692508	0.00404496		Edf1	7.42261	0.818103	1.81021e-11
H2-T24	1.94761	0.533951	0.126015		Lrrc48	0.965968	1.23663	0.570475		Bmp5	1	20.1325	0.564014		Dock10	4.18252	0.383721	0.00100868		Dtx3l	-5.56207	-1.15364	1.18856e-06		Sec61b	-4.72905	-0.401215	8.65855e-05		Tab2	7.59301	1.11597	2.98024e-12		Tob2	4.99854	0.976866	2.30053e-05		Map1lc3b	3.85559	0.356029	0.00407824		Slfn2	7.41373	0.780316	1.75036e-11
Trdc	1.94561	1.26688	0.126434		Gm18025	0.965968	1.23663	0.570475		Gm15911	1	20.1325	0.564014		Gdi1	4.17871	0.668259	0.00102691		Llph	-5.56121	-0.631349	1.16754e-06		2020-09-15	-4.72396	-0.44315	8.80341e-05		S100a11	7.59301	0.937075	2.57416e-12		Chmp2a	4.99774	0.497515	2.29898e-05		Nop16	-3.85031	-1.60842	0.00425031		Psma5	7.40847	1.07227	1.97334e-11
Crip2	1.94491	0.921883	0.126589		Capn3	0.964906	0.149949	0.570475		Gm26887	1	20.1325	0.564014		Xrn1	4.1776	0.612199	0.00102958		Gm2000	-5.54852	-1.62786	1.3012e-06		Ndufab1	-4.71969	-0.61594	9.01803e-05		Capza1	7.5885	0.825467	2.75044e-12		Capns1	4.9966	0.594758	2.30053e-05		Pdlim2	3.84825	0.532854	0.00419513		Ube2d3	7.40623	0.643985	1.81021e-11
Smim4	1.94292	0.233238	0.127023		Gbp7	0.962503	0.0802889	0.570475		Tldc1	0.998719	1.14437	0.564014		Oat	4.17448	0.628409	0.00104122		Ndufb10	-5.54198	-0.600615	1.27069e-06		Ndufs6	-4.7192	-0.551897	9.03507e-05		Rbm5	7.58716	0.758122	2.83939e-12		mt-Nd3	4.9942	0.327317	2.31314e-05		Pkm	3.84676	0.390937	0.00421555		Sirt7	7.40175	1.06715	2.15506e-11
Gemin6	1.93159	0.464598	0.129612		Nrap	0.961425	1.52614	0.571188		Znrd1as	0.997898	0.338238	0.564014		Kat2b	4.17303	0.802533	0.00104748		Cdkn2d	-5.53387	-1.10784	1.36368e-06		Gar1	-4.71912	-1.19231	9.24761e-05		Actr3	7.58614	0.613445	2.92058e-12		Arpc5	4.98828	0.482421	2.37567e-05		H2-DMa	3.84525	0.613326	0.00423559		Pnp	7.39907	1.28585	2.15506e-11
Arhgef10	1.93119	0.483914	0.129713		Gm10840	0.961425	1.52614	0.571188		Trbv12-2	0.997718	0.531206	0.564014		H3f3a	4.17286	0.226682	0.00104224		Tpr	-5.52841	-0.584736	1.38277e-06		Sh3gl3	-4.7133	-2.25772	9.58796e-05		Ikzf4	7.58151	0.971074	3.07872e-12		Stx6	4.97831	0.712877	2.51377e-05		Slc39a6	3.84295	1.11833	0.00428167		Atp5b	7.39032	0.834327	2.26364e-11
Lyrm7	1.92605	0.875215	0.131126		Fam58b	0.961234	0.13833	0.571209		Jdp2	0.995741	0.404585	0.564014		Sec24a	4.17162	0.661158	0.00104748		Tshz2	5.52173	2.1744	1.51357e-06		Psme2	-4.70749	-0.475248	9.54735e-05		Utrn	7.5715	0.8949	3.18863e-12		Hspa8	4.97677	0.402424	2.51377e-05		Lpxn	3.84166	0.512377	0.00427245		Tap1	7.38884	0.877445	2.17145e-11
Rreb1	1.92069	0.322841	0.132512		Gm17767	0.953011	0.979853	0.57694		Cd1d1	0.994709	0.160267	0.564191		Fam69a	4.1619	0.627085	0.00108887		Mtap	-5.51508	-1.84915	1.5591e-06		Gimap3	-4.70748	-0.317958	9.39595e-05		Snw1	7.56473	0.805698	3.35373e-12		Sec62	4.96953	0.420255	2.5989e-05		Camk2n1	3.84062	0.980436	0.00430414		Atp5g3	7.3554	0.979813	2.73338e-11
Gm12474	1.92022	1.36687	0.132696		Gm16386	0.951533	0.78917	0.577709		Tceal3	0.994648	0.57005	0.564191		Ldlrap1	4.1608	0.721828	0.00109157		Tomm5	-5.507	-0.737675	1.57689e-06		Twsg1	-4.7055	-1.42285	9.72384e-05		Tma7	7.56438	0.547269	3.16338e-12		Rer1	4.9679	0.462413	2.60785e-05		Pld3	3.83896	0.666753	0.00430414		Rcbtb2	7.34142	1.97168	4.72551e-11
Nop56	1.91115	0.160189	0.134835		Gm27253	0.951291	1.47367	0.577767		Efhc2	0.993926	1.33701	0.564678		Bfar	4.16019	0.599162	0.00109157		Twistnb	-5.50399	-0.832934	1.56999e-06		Ndufv2	-4.70309	-0.597073	9.61021e-05		Cfl1	7.56049	0.523979	3.25898e-12		Lman2	4.95666	0.596428	2.78429e-05		Adam8	3.83367	2.20303	0.00445435		Csnk2b	7.33967	1.03626	3.17483e-11
Emid1	1.91042	1.6888	0.135064		Gm37362	0.951291	1.47367	0.577767		Khdc1a	0.991347	0.70696	0.566228		Arid4a	4.16004	0.383577	0.00109157		Vdac2	-5.5032	-0.609677	1.57217e-06		Ndufs3	-4.68514	-0.628644	0.00010378		Sla2	7.55849	1.27725	3.75127e-12		Ndufa11	4.95631	0.542631	2.77125e-05		Hdgfrp3	-3.83053	-1.17347	0.00445435		Taf10	7.33784	0.801515	2.92769e-11
D930028M14Rik	1.90654	0.788831	0.136011		Izumo4	0.942939	0.107843	0.583934		Snx33	0.985203	0.374978	0.570324		Man1a	4.15732	0.503981	0.00110169		Il17ra	-5.50176	-1.26127	1.6017e-06		Tmem256	-4.68407	-0.858791	0.00010585		Mif4gd	7.55796	1.01759	3.56429e-12		Zfand5	4.94149	0.836787	3.02001e-05		Commd4	3.82913	0.519775	0.00445435		Hnrnpa3	7.33485	0.85369	3.18783e-11
Slc39a8	1.90625	0.985004	0.136067		Acsf2	0.940351	0.296453	0.585623		Itgb8	0.984383	0.178842	0.570903		Rnf145	4.15655	0.61423	0.00110359		Cdipt	-5.50107	-0.676598	1.57689e-06		Mien1	-4.68355	-0.566818	0.000104614		Cmip	7.55548	1.04398	3.80787e-12		Cmah	-4.93997	-1.92174	3.11736e-05		Capn3	-3.82793	-1.18075	0.00447015		Atp2a3	7.33344	1.64525	4.08052e-11
Tfap4	1.90501	0.366874	0.136361		9330160F10Rik	0.940326	0.332513	0.585623		Ildr1	0.984141	0.34131	0.57093		Snrk	4.15383	0.614445	0.00111571		Tmem14c	-5.50106	-0.690863	1.57689e-06		Plekhj1	-4.67983	-0.525023	0.000105747		Tcf25	7.55462	0.776852	3.56215e-12		Gnl1	4.92693	0.836004	3.21165e-05		Ggh	3.8236	0.84482	0.00454703		Atp5k	7.33239	1.00535	3.51679e-11
Grk6	1.90072	0.131573	0.137457		Arfgef2	0.93968	0.253838	0.586017		Zbtb12	0.977517	0.309368	0.575342		Gtf2i	4.15255	0.546682	0.00111924		Ppm1j	-5.50078	-2.47155	1.70082e-06		Ola1	-4.67678	-0.656982	0.0001083		Wapl	7.55454	0.932703	3.56215e-12		Txndc17	4.92429	0.642373	3.24897e-05		Actn2	3.82145	1.8305	0.00465126		Cd5	7.3195	1.00115	3.78606e-11
Notch2	1.88954	0.323303	0.140435		Ankrd55	0.939243	0.230086	0.586114		Btbd11	0.974881	0.290914	0.577		Stambpl1	4.14997	0.670328	0.00112826		Gpr34	-5.50076	-1.86495	1.66185e-06		Tspan13	-4.66988	-0.566024	0.000110733		Paip2	7.54913	0.676208	3.59998e-12		Txnl1	4.92377	0.586255	3.21991e-05		Sypl	3.81701	0.754505	0.00463667		Fam177a	7.3149	1.48695	4.17447e-11
Rcn3	1.88892	0.615409	0.140586		Bivm	0.93863	0.365415	0.586434		RP23-361O12.3	0.973526	1.60005	0.577964		Igf1r	4.14952	0.585443	0.00113171		Gar1	-5.49989	-1.45316	1.6863e-06		Tspan3	-4.66527	-0.838684	0.000113975		Vgll4	7.54722	0.883825	3.7933e-12		Psmd2	4.9191	0.670871	3.29905e-05		Ptpn13	3.81678	0.89795	0.00465126		Leprotl1	7.3133	0.718271	3.32665e-11
Sumf2	1.88689	0.351962	0.141102		Tmem86b	0.937955	0.468991	0.586902		Plcxd1	0.973051	0.72728	0.578168		1600014C10Rik	4.1458	0.559734	0.00114253		Sh3bp5	-5.49711	-1.35993	1.66307e-06		Dusp2	-4.66373	-0.775619	0.000113984		Reep5	7.54582	0.801515	3.59998e-12		Xbp1	4.91061	0.863646	3.47646e-05		Arpc3	3.81415	0.304855	0.00465126		Ctsa	7.31314	1.57576	4.88703e-11
Galnt4	1.88584	0.643084	0.141325		4930432K21Rik	0.937377	0.959095	0.587344		Gm26525	0.970681	0.874905	0.580042		AY036118	4.1449	0.293045	0.00114387		Ppp1r12a	-5.49382	-0.690459	1.65671e-06		Ldha	-4.66134	-0.487195	0.000117363		Sdcbp2	7.54379	1.16097	3.80787e-12		Psmd8	4.90022	0.524486	3.60705e-05		Calr	3.8097	0.403125	0.00472295		Sirt2	7.3125	1.31633	3.94941e-11
Acvr1b	1.88468	0.512197	0.14162		Gm43740	0.927801	1.01799	0.594069		Gm16069	0.970681	0.874905	0.580042		Rnf38	4.14365	0.759098	0.00115482		Ran	-5.49108	-0.650208	1.78469e-06		2010111I01Rik	-4.65645	-0.764481	0.000116858		Limd1	7.53876	1.07882	3.99728e-12		Taf10	4.89899	0.446247	3.60705e-05		Serpinb6a	3.80404	0.989412	0.00490592		Zfp207	7.31023	1.04334	3.55291e-11
Gm16084	1.88283	3.14823	0.142125		Smr3a	0.926902	4.01799	0.594763		Bpifa2	0.968363	1.97444	0.581525		Arid5a	4.13292	0.648402	0.00120355		Gng12	-5.49062	-2.33683	1.79803e-06		Ccnd2	-4.65556	-0.482704	0.000118311		Arpc5l	7.53467	0.740876	3.99728e-12		Klf13	-4.88765	-0.540195	3.79192e-05		Gar1	-3.79957	-1.00822	0.00497769		Lxn	7.30872	1.99888	5.05264e-11
Adgra3	1.88283	3.14823	0.142125		Cpe	0.921284	0.391206	0.598057		4933406P04Rik	0.967876	0.615986	0.581595		Hdac1	4.12911	0.447488	0.00121957		Stk10	-5.48851	-0.833182	1.6735e-06		Zfp593	-4.65505	-1.3238	0.00012008		Ptpn1	7.53071	0.776355	4.11646e-12		Eif4e2	4.8869	0.638402	3.81987e-05		Ipcef1	3.79816	0.465145	0.0049248		Gimap4	7.30808	0.77921	4.05253e-11
Ahsa2	1.87657	0.186662	0.143609		6230400D17Rik	0.920244	0.421053	0.598724		Ttc28	0.967716	0.153788	0.581595		Tmem234	4.12498	0.341767	0.00123696		Tomm22	-5.48378	-0.574584	1.70482e-06		C1qbp	-4.64453	-0.829573	0.000126176		2010111I01Rik	7.52825	1.00976	4.37113e-12		Dusp1	4.88541	1.07025	3.95431e-05		Myl12b	3.79765	0.276798	0.0049248		Rhoh	7.30718	0.624117	3.44259e-11
Homer3	1.87485	1.07423	0.144085		Prdm16	0.919253	0.327777	0.599527		Gm16702	0.967033	0.363006	0.582066		H2-Q4	4.12278	0.342968	0.00124831		Dnajc7	-5.48227	-0.698874	1.70093e-06		Ctsw	-4.64429	-1.12832	0.000124011		Thap3	7.52295	0.947682	4.50884e-12		2020-09-15	4.88533	0.467901	3.86198e-05		B3gat3	3.79269	0.670888	0.00501358		Ncf4	7.30249	1.15184	3.87473e-11
Gm8369	1.87331	0.112989	0.144482		A930001A20Rik	0.917169	1.47367	0.600314		E130102H24Rik	0.966766	0.261378	0.582173		Nktr	4.1216	0.35846	0.00125031		Tbc1d4	5.4783	1.00203	1.76386e-06		Cacybp	-4.64156	-0.592245	0.000125661		Slc3a2	7.52096	0.891215	4.34324e-12		Bmyc	4.88431	0.731613	3.86198e-05		Nme1	-3.79237	-0.577533	0.00511732		Bzw1	7.28679	0.909959	4.0499e-11
Map4k4	1.87267	0.141526	0.144625		Dnajc16	0.910956	0.348137	0.603675		Zfp763	0.965695	0.346288	0.582917		Rc3h1	4.12083	0.686163	0.00125705		Ndufb5	-5.47776	-0.559907	1.74844e-06		Sp140	-4.63527	-0.94306	0.000128121		mt-Nd2	7.51518	0.410208	4.50884e-12		Cd44	4.88113	0.868516	3.96204e-05		Eid1	3.78773	0.675483	0.00510009		Arf6	7.28525	1.01216	4.24056e-11
Zhx3	1.87258	0.489271	0.144644		H2-DMb2	0.910153	0.608597	0.604194		Zfp455	0.965488	0.441615	0.583003		Zfp608	4.11935	1.76255	0.00128422		B4galnt1	-5.4768	-0.636834	1.75057e-06		Srp54b	-4.63281	-0.7228	0.000129333		Fkbp1a	7.51202	0.727463	4.56503e-12		Psenen	4.88016	0.429949	3.92141e-05		Hip1	3.7854	2.01932	0.00528989		Tspan32	7.28454	0.635447	3.95688e-11
Zfp553	1.87174	0.271855	0.144887		Cep170b	0.909755	0.374132	0.604414		Myo3b	0.96334	0.297847	0.584538		Setd2	4.113	0.550476	0.00129351		Ube2d3	-5.47605	-0.408313	1.74844e-06		Ssu72	-4.63151	-0.510987	0.000129798		Setd5	7.50621	1.01744	5.16788e-12		Nav2	4.87479	1.20065	4.05997e-05		Nfil3	3.78532	1.20273	0.00516103		Sdhb	7.27502	1.03975	5.1665e-11
Gm16279	1.8699	1.35682	0.145426		Gm17354	0.908634	0.328085	0.605212		Fhl4	0.960341	2.08547	0.586651		Sdc4	-4.11255	-0.828522	0.00130055		Cst7	5.47527	0.67466	1.73807e-06		Prdx5	-4.63011	-0.492789	0.000129798		Fam3c	7.50459	0.850063	5.17274e-12		Nfkbiz	4.87239	0.983867	4.15846e-05		Tomm40	-3.78043	-0.814993	0.00528989		Tbrg1	7.26875	0.957864	5.09891e-11
Ptger3	1.869	2.31173	0.145707		Igf2bp3	0.907768	0.192685	0.605721		A130057D12Rik	0.956651	0.868241	0.589344		Lncpint	4.11158	0.641558	0.00130055		Fam78a	-5.46812	-1.15117	1.852e-06		Scand1	-4.62729	-0.407687	0.000131165		Coro1a	7.5041	0.500202	4.76089e-12		Atp5k	4.86882	0.507117	4.10712e-05		Pabpc1l	3.77607	2.4888	0.00544632		Psmb2	7.26615	0.985965	5.09891e-11
Gm10069	1.86789	0.951837	0.145983		Dbx2	0.905541	3.69606	0.607218		5830454E08Rik	0.955732	0.451181	0.589549		Ppp1r10	4.1097	0.539659	0.00130195		Grk6	-5.46713	-0.759171	1.84716e-06		AW112010	-4.622	-0.397789	0.000135529		Ptges3	7.49726	0.812441	5.07059e-12		Ms4a4c	-4.86539	-2.38265	4.48602e-05		Hspa8	-3.77059	-0.308097	0.00544632		Trp53inp1	7.25151	1.18071	5.75538e-11
Tprgl	1.86535	0.106551	0.146724		Snta1	0.905541	3.69606	0.607218		Exph5	0.954782	1.23747	0.59038		Setd1b	4.10859	0.544552	0.00130809		Sh2d1a	5.46354	0.63734	1.85567e-06		Treml2	-4.6198	-1.3266	0.000137772		Ppp1r16b	7.49618	1.06175	5.51161e-12		Snrpd1	4.86495	0.636533	4.16922e-05		Gyg	3.76911	0.850555	0.00544632		Slc4a7	7.24602	1.65927	6.94337e-11
Gpr132	1.86095	0.175472	0.147931		Hdac11	0.903028	0.546313	0.608652		Ggt7	0.954263	0.330584	0.590708		Eif4a2	4.10749	0.300684	0.00130809		Polr1d	-5.46314	-0.549014	1.86094e-06		Ddx39b	-4.61228	-0.471321	0.000140806		Atp6v1f	7.49396	0.644749	5.11964e-12		Pecam1	-4.86337	-1.06238	4.25745e-05		Gm26551	-3.76847	-2.11767	0.00551741		Tradd	7.24588	1.38563	6.04521e-11
Tnnt2	1.85955	3.41127	0.148393		Gm20721	0.902885	0.802976	0.608673		Rab43	0.953905	0.251085	0.590959		Ccng2	4.10441	0.63473	0.00132447		Mgst2	-5.45998	-0.742039	1.90649e-06		Pbx2	-4.61197	-1.0471	0.00014106		Uhrf2	7.4895	0.915317	5.38297e-12		Psmb2	4.85734	0.537159	4.34466e-05		Ndfip1	3.76758	0.500255	0.00544632		Ssr3	7.24433	1.31451	6.29879e-11
Mafk	1.85175	0.353236	0.15058		Myo3b	0.90244	0.253117	0.608905		Rft1	0.953596	0.305862	0.591175		Pstpip1	4.09697	0.461462	0.00136444		Mrps16	-5.45194	-0.656281	1.96788e-06		Pomp	-4.60991	-0.473832	0.000142727		Pkn2	7.48937	1.07376	5.89758e-12		Irf2bp2	4.8571	0.704877	4.35856e-05		Slc3a2	3.7664	0.483133	0.00544632		Plec	7.24413	1.42243	7.08401e-11
Klrd1	1.84498	4.63366	0.152813		Lcat	0.895318	1.37413	0.61399		Mgme1	0.951017	0.378519	0.592102		Ccr4	-4.09246	-1.49221	0.001401		Dph5	-5.45106	-1.24244	2.03208e-06		H2afy	-4.60565	-0.434093	0.000144246		Msi2	7.48854	1.0555	5.99172e-12		Rrad	4.85332	1.14609	4.56406e-05		Pomp	3.76347	0.379694	0.00549671		Ostc	7.24018	0.964925	5.71957e-11
Erp27	1.84487	0.685443	0.152705		Nlgn2	0.889985	0.341527	0.616582		Acadsb	0.948099	0.225793	0.593959		Add3	4.09083	0.490569	0.00139647		Hnrnpa0	-5.44735	-0.403319	2.02242e-06		Tmcc1	-4.60282	-0.886663	0.000145994		Notch1	7.48563	1.07888	5.89758e-12		Mir155hg	4.85204	1.77669	4.63711e-05		Rabep2	3.76184	0.946373	0.00553539		Znrf2	7.23978	1.14214	5.54158e-11
Kcnh3	1.84383	1.20963	0.152947		Sgms2	0.889278	1.1111	0.616582		4732471J01Rik	0.945185	0.947968	0.596098		Traf1	4.08661	0.40637	0.0014167		1700025G04Rik	-5.4421	-26.0975	2.46863e-06		Mrpl24	-4.60101	-0.583337	0.000146384		Tra2b	7.48463	0.684949	5.56812e-12		Ablim1	-4.84459	-0.53934	4.56343e-05		Mybbp1a	-3.76046	-1.08881	0.005605		Uqcrc1	7.23776	1.09585	6.18617e-11
Gm26836	1.84383	1.20963	0.152947		Gm17203	0.887528	0.69606	0.616582		Mcoln3	0.943368	0.378519	0.597304		Snrnp48	4.08437	0.588471	0.00142632		Me2	-5.44025	-1.26921	2.13375e-06		Znrd1	-4.60019	-0.674912	0.000147408		Hp1bp3	7.48179	0.854868	5.91612e-12		Polr1d	4.84078	0.448924	4.63272e-05		Tmc3	3.76012	3.23082	0.00575323		Sin3b	7.23251	1.02906	6.19408e-11
Seh1l	1.84233	0.233532	0.153246		Gpr18	0.886289	0.117377	0.616582		A730071L15Rik	0.938275	0.868241	0.600527		Smpdl3a	4.08388	0.309688	0.00142632		Ctage5	-5.43341	-0.817493	2.17306e-06		2610204G07Rik	-4.5995	-2.39724	0.00015714		Cox7c	7.48046	0.533281	5.37109e-12		Swi5	4.83237	0.511558	4.82222e-05		Pycard	3.75675	0.439815	0.00562145		Ndufv2	7.22094	1.02039	6.4932e-11
Nfix	1.8362	0.322873	0.154771		Prkar2b	0.88369	0.589145	0.616582		Ppp2r3a	0.938214	0.696906	0.600527		Il2rb	4.08376	0.441748	0.00142632		Taldo1	-5.43269	-0.559068	2.17306e-06		Nenf	-4.59937	-1.59339	0.00015045		Sh2d2a	7.47756	0.956913	5.89758e-12		Tra2b	4.8315	0.438374	4.82222e-05		Asap1	-3.75479	-0.693239	0.00566872		Itgb1bp1	7.21983	1.41008	7.06904e-11
Gm20692	1.83207	0.793139	0.155973		Ddah2	0.883464	0.637167	0.616582		Magi2	0.938057	0.330584	0.600588		Cd72	4.07849	0.811886	0.00145931		Skap1	-5.43167	-0.418759	2.17306e-06		Max	-4.5941	-0.715229	0.00015045		Sfpq	7.47751	0.736665	5.82422e-12		Arhgef3	4.82868	0.725741	4.95774e-05		Neu3	3.75135	1.13025	0.00574839		Mrpl18	7.21694	0.976947	6.33827e-11
Nob1	1.83044	0.224804	0.156426		Fam3b	0.881325	0.741864	0.616582		Naip6	0.936973	0.369925	0.601435		Lfng	4.07633	0.45595	0.00146627		Tuba4a	-5.4284	-0.914272	2.23986e-06		Myc	-4.58791	-1.71034	0.000161813		Pou2f2	7.47693	0.792495	5.70017e-12		Socs3	-4.82452	-1.11939	4.97166e-05		Csprs	3.74818	1.15848	0.00581079		Yipf3	7.21148	1.20629	7.34162e-11
Tsacc	1.83002	0.612181	0.15656		Trav7-6	0.875141	1.04836	0.618735		Sfxn4	0.93677	0.539503	0.601541		Kat6a	4.07387	0.545585	0.00147935		S100a13	-5.42766	-0.660998	2.2449e-06		Socs1	-4.58493	-0.767367	0.000158954		Birc2	7.46786	0.909109	6.12789e-12		Isy1	4.81889	0.86545	5.15323e-05		Nucb1	3.74551	0.596246	0.00581872		Atp5j	7.20513	0.775135	7.33384e-11
Iqgap2	1.82901	0.233306	0.15681		F830016B08Rik	0.874184	0.201296	0.619302		Snx13	0.934715	0.222887	0.602454		Slc12a6	4.07372	0.546272	0.00147935		Plcxd2	-5.42628	-1.74494	2.36817e-06		Eif3a	-4.57888	-0.531347	0.000161352		Rnh1	7.46647	0.915935	6.28447e-12		Hspa14	4.81459	0.686167	5.23705e-05		Pmepa1	3.74122	0.585216	0.00589276		Atp5g2	7.2015	0.714435	6.84073e-11
Gm11579	1.82767	0.682715	0.157194		Lrfn1	0.866653	1.1111	0.624852		Mapk8ip1	0.931484	0.427136	0.605067		Rin3	4.07158	0.61135	0.00149053		Ndufb11	-5.42209	-0.489188	2.27988e-06		Serf2	-4.5784	-0.296445	0.000161505		Fam46a	7.46505	1.62603	7.5618e-12		Cfl1	4.81279	0.351997	5.25132e-05		Gtpbp2	3.72899	0.467861	0.00616835		Pcbp2	7.20046	0.844988	7.34162e-11
Prmt3	1.82478	0.225269	0.157945		Gm20109	0.866653	1.1111	0.624852		Per3	0.929669	0.42303	0.6063		Zeb1	4.06667	0.622489	0.00152112		Gm4070	-5.41638	-1.66045	2.45592e-06		Fam3c	-4.57578	-0.563893	0.000161813		Rassf5	7.46231	0.752214	6.36897e-12		Pdap1	4.81232	0.664284	5.25419e-05		Rrp9	-3.72675	-1.04048	0.00631656		Tpt1	7.18378	0.422732	7.20842e-11
Epb41l1	1.81732	1.99623	0.160216		Map3k9	0.862356	0.625671	0.627901		Gm26867	0.928993	0.470452	0.606598		Zfp512	4.06507	0.678373	0.00152726		Foxo1	-5.41556	-0.718534	2.37705e-06		Akap8l	-4.57232	-0.853922	0.000165705		Gbp3	7.4619	1.08331	6.70192e-12		H2-T23	4.81195	0.362883	5.25419e-05		Tbcb	3.71893	0.51199	0.006386		Iqgap2	7.1818	1.80426	1.02242e-10
Irf7	1.81534	0.23138	0.160746		Gm26847	0.861161	0.656532	0.628589		Dalrd3	0.924671	0.140988	0.606598		Slc35b3	4.0642	0.618873	0.0015293		mt-Nd5	-5.41252	-0.415633	2.37119e-06		Casp8	-4.5678	-0.582744	0.000167347		Samsn1	7.4612	1.09617	6.54578e-12		Ndufv2	4.80976	0.550569	5.29127e-05		Rbl2	3.71812	0.706991	0.00642136		2020-09-09	7.17735	0.943231	8.29069e-11
Tcrg-C4	1.8064	1.30547	0.163394		Gm10260	0.858746	1.28102	0.630127		Zfp677	0.92325	0.225038	0.606598		Mtss1	4.06274	1.39909	0.00154738		Eif5	-5.40825	-0.530542	2.4193e-06		Ifngr1	4.56458	0.490239	0.000168513		Krit1	7.45523	0.789439	6.96842e-12		Mrpl52	4.79045	0.411829	5.78103e-05		Utp14a	-3.71743	-0.945377	0.00646614		Ppil1	7.17661	1.70515	1.1797e-10
Xkrx	1.80151	1.6743	0.164691		Gm10638	0.858746	1.28102	0.630127		Degs2	0.922339	0.638013	0.606598		Dennd2d	4.06022	0.680061	0.00154944		Ndufa7	-5.40806	-0.474685	2.43164e-06		Nhp2	-4.56242	-1.0126	0.000177602		Ifnar1	7.44919	0.964596	6.99598e-12		Zmiz2	4.78904	0.712698	5.8633e-05		Slc25a53	3.71624	1.56794	0.00650947		H2-T23	7.17116	0.658876	8.18647e-11
Grm6	1.80151	1.6743	0.164691		Mamstr	0.858746	1.28102	0.630127		Bcl2l14	0.922339	0.638013	0.606598		Gmip	4.05887	0.585258	0.0015547		Arhgdia	-5.40716	-0.493259	2.46591e-06		Kmt2a	-4.56106	-0.501469	0.000171853		Cd84	7.44797	0.771073	6.99598e-12		Pgs1	-4.78889	-0.772269	5.85753e-05		Agpat4	3.71618	1.16567	0.00649969		Gnb2l1	7.16956	0.577371	8.18332e-11
Lcn4	1.79708	1.82631	0.166025		E230013L22Rik	0.858746	1.28102	0.630127		Enpp5	0.920914	0.268406	0.606598		Rbms1	4.05776	0.477368	0.00156119		Smchd1	-5.40056	-0.742601	2.53422e-06		Sp110	-4.56083	-0.592428	0.000172576		Stk4	7.44096	0.85526	7.6677e-12		Tmem126a	4.78414	0.756252	5.95954e-05		Orai3	3.71409	1.00832	0.00650947		Hmgn5	7.16682	1.96695	1.17171e-10
Abhd11	1.79471	0.254872	0.166699		AI597479	0.856191	0.269795	0.63174		Styxl1	0.920494	1.4074	0.606598		Sat1	4.05697	0.40976	0.0015625		Ass1	-5.39979	-0.843868	2.63345e-06		Stat1	-4.55568	-0.473088	0.000175657		Slc12a6	7.44016	1.11773	7.69676e-12		Hmgb1	4.78402	0.357091	5.9237e-05		Ifi27l2a	3.71197	0.449876	0.00650947		Esyt2	7.16223	1.31664	1.01559e-10
Arid5a	1.79083	0.188659	0.167929		9530077C05Rik	0.855108	1.69606	0.631925		Gm5493	0.920494	1.4074	0.606598		Lars2	4.05414	0.405536	0.00157419		Zfp706	-5.3949	-0.562658	2.59313e-06		Rhoa	-4.5472	-0.338109	0.000181966		Itga4	7.43596	0.877963	7.6716e-12		Slc1a5	4.78215	0.726487	6.08093e-05		Cnbp	-3.71131	-0.330048	0.00653229		BC031181	7.16064	0.981445	9.15115e-11
Nckap5l	1.78778	0.487983	0.168818		Gm26792	0.855108	1.69606	0.631925		Rslcan18	0.920494	1.4074	0.606598		Ndufb5	4.04775	0.32926	0.00161395		Cd226	-5.39266	-1.71501	2.71378e-06		Samsn1	-4.54457	-0.825372	0.000186849		Arhgap25	7.4337	1.03412	7.84756e-12		Psma6	4.77754	0.559593	6.12973e-05		Cux1	3.70409	0.696619	0.00669008		Fam105a	7.15654	0.983436	1.01857e-10
Bpnt1	1.78686	0.476207	0.169035		Gm10718	0.855108	1.69606	0.631925		Plppr3	0.920494	1.4074	0.606598		Bank1	4.04662	1.5539	0.00164584		Ybx1	-5.39232	-0.539194	2.74001e-06		Il6st	-4.54293	-0.788739	0.000186849		Tgfbr1	7.43281	1.25709	8.48596e-12		Wdr26	4.77543	0.647384	6.18215e-05		Rnf149	3.70285	0.628575	0.00669451		Fundc2	7.15461	1.16266	1.062e-10
Nop2	1.786	0.303102	0.169263		Tmem253	0.855108	1.69606	0.631925		Gm26580	0.920494	1.4074	0.606598		Usp24	4.04378	0.661979	0.00164464		Rab5c	-5.39018	-0.707134	2.64592e-06		Rtcb	-4.54266	-0.675571	0.000185932		2310036O22Rik	7.43135	0.661461	8.00783e-12		Ndufs8	4.7742	0.623397	6.18215e-05		Klrg1	3.70158	1.65058	0.00679713		Coro7	7.15279	1.76533	1.35495e-10
Dynll1	1.78091	0.0885979	0.170621		Gm16231	0.855108	1.69606	0.631925		Cog3	0.920413	0.244892	0.606598		Zfp280d	4.04228	0.5596	0.00164809		Snhg12	-5.38924	-1.03997	2.71378e-06		Gltscr2	-4.53828	-0.440494	0.00018849		Cnot6l	7.43122	0.887621	8.17231e-12		Plagl2	4.77195	1.03939	6.33455e-05		Capzb	3.69883	0.35598	0.00677762		Fam134b	7.14689	1.06218	1.05025e-10
Hcn3	1.77119	1.14823	0.173871		RP24-174G2.4	0.855108	1.69606	0.631925		Gm8817	0.918886	0.70696	0.60741		Zfp467	4.0262	0.743508	0.00175952		Eprs	-5.38717	-0.973635	2.74001e-06		H13	-4.53796	-0.639192	0.000188913		Atp5j2	7.4306	0.537961	7.58104e-12		Vcp	4.77116	0.5257	6.29288e-05		Ifngr1	3.69726	0.433219	0.00679851		Ubxn1	7.14468	0.8069	1.00844e-10
Gm9828	1.77098	0.826306	0.173912		Tbxas1	0.855108	1.69606	0.631925		Phf19	0.917827	0.947968	0.608068		Saraf	4.02399	0.289456	0.00176677		Srm	-5.38368	-2.48741	3.098e-06		Rundc3a	-4.53745	-1.94769	0.000194663		Atp5j	7.42828	0.583719	7.67854e-12		Vimp	4.7705	0.613485	6.33455e-05		Il2rb	3.69551	0.493608	0.00684178		Rnf114	7.14036	1.29053	1.19717e-10
Ifit1bl1	1.76701	0.194305	0.175102		9530046B11Rik	0.855108	1.69606	0.631925		Kif3a	0.917444	0.366758	0.608342		Krit1	4.0233	0.370065	0.00177205		Igfbp4	-5.37877	-4.6374	3.32797e-06		Igbp1	-4.53034	-0.676189	0.000195034		Tmed2	7.42772	0.64383	7.81974e-12		Clec2d	4.76636	0.343673	6.36999e-05		Rab19	3.6892	0.788675	0.00701657		Ncor1	7.13031	0.80835	1.12632e-10
Exoc5	1.7669	0.210345	0.175117		Gm10719	0.855108	1.69606	0.631925		Gm9484	0.916992	1.01508	0.608717		Cdc23	4.02269	0.708604	0.0017772		Ywhae	-5.37762	-0.611545	2.83506e-06		Ahnak	4.53021	0.626522	0.000193563		Cst7	7.42391	0.954426	7.8165e-12		Mrpl42	4.74782	0.679837	6.97747e-05		Fis1	3.67674	0.363136	0.00731648		Add1	7.12978	1.42505	1.36144e-10
Saraf	1.76676	0.0809952	0.175154		Mogat1	0.85407	0.69606	0.632352		Adssl1	0.916236	0.539503	0.609249		Serpina3g	-4.01883	-0.714302	0.00182028		Snrpb	-5.37681	-0.524529	2.84559e-06		Tmem158	-4.52662	-1.8252	0.000205135		Sh2d1a	7.42336	0.833364	8.03459e-12		Pitpna	4.74717	0.49249	7.0023e-05		Sys1	3.67097	0.398834	0.00746735		Mrpl57	7.12924	1.15572	1.21491e-10
Usp24	1.76524	0.194148	0.175675		Trav7d-4	0.852983	1.55856	0.632858		Ccl8	0.913315	3.82244	0.611483		Plec	4.01628	0.532514	0.00181939		Zfp36l2	-5.36907	-0.533682	2.94768e-06		Txn1	-4.51993	-0.544591	0.000209391		Nlrc5	7.41416	1.12997	9.24988e-12		Psat1	4.74187	1.40759	7.31389e-05		Ybx3	-3.66997	-0.838663	0.00761688		Ndufb5	7.1264	0.851966	1.14088e-10
Xxylt1	1.76207	0.425522	0.176172		Nxpe4	0.852395	1.69606	0.633244		B830012L14Rik	0.913315	3.82244	0.611483		Ifngr2	4.01311	0.793448	0.00183753		Gnb1	-5.36768	-0.640834	2.94768e-06		Crbn	-4.51869	-0.759089	0.000205135		Arf6	7.40292	0.840777	9.47993e-12		Psmc4	4.73714	0.56215	7.30122e-05		Snx5	3.66756	0.602599	0.00757159		Bak1	7.12585	1.58797	1.43454e-10
Khdc3	1.76135	0.855452	0.176387		F2r	0.851664	0.162533	0.63375		Lmod3	0.913315	3.82244	0.611483		Nsd1	4.01223	0.435133	0.00183753		Atp5g1	-5.36223	-0.645109	3.23278e-06		Nfatc1	-4.51326	-0.820395	0.000212315		Gtpbp2	7.40184	0.887186	9.79074e-12		Trp53	4.7352	0.521195	7.34189e-05		Tmem159	3.66704	1.6354	0.00762205		Ctsd	7.12264	0.978634	1.26921e-10
Dusp7	1.75839	0.224804	0.177396		Hist3h2a	0.850553	0.146306	0.634425		Dpysl5	0.913315	3.82244	0.611483		Ptms	4.00708	0.572046	0.00187801		Caprin1	-5.34934	-0.815074	3.28788e-06		Nsmce1	-4.5096	-0.661852	0.000212315		Zcchc7	7.40097	0.831447	9.54888e-12		Zbtb1	4.72671	0.658075	7.65484e-05		Frmd4b	3.6664	1.30265	0.00762205		Sdcbp2	7.12176	1.57775	1.58e-10
Ddit4	1.75249	0.141865	0.179217		Bcl7a	0.850345	0.178617	0.634548		Nlgn2	0.912311	0.366985	0.612128		Gna15	-4.007	-1.67396	0.00190547		Usp18	-5.343	-2.50029	3.76297e-06		Trim12a	-4.50847	-0.58701	0.000212315		Fam169b	7.39738	0.73175	9.58958e-12		Cisd2	4.72611	0.584017	7.6632e-05		Znhit6	-3.66516	-1.0588	0.00762205		Shisa5	7.11981	0.491198	1.07571e-10
Gm7160	1.75192	0.746135	0.179432		D3Ertd751e	0.848555	0.213667	0.635576		Adgrg1	0.909992	0.70696	0.613751		Gramd4	4.00479	0.745177	0.00189299		Vasp	-5.33865	-0.519834	3.42574e-06		Pddc1	-4.50464	-0.917224	0.000217349		Yy1	7.39459	0.813272	1.00316e-11		Psmb4	4.72578	0.484898	7.6632e-05		Ntan1	3.66393	0.478855	0.00762205		Ufc1	7.1193	1.25248	1.36904e-10
Sfmbt2	1.75156	0.587519	0.179532		Mxra8	0.8468	0.625671	0.636946		Ccdc136	0.90062	0.696906	0.61994		Hnrnpf	4.00054	0.216369	0.001914		Prkd2	-5.33691	-0.816755	3.45637e-06		Traf3ip3	-4.50104	-0.433336	0.000218969		Kpna4	7.39337	0.853053	9.89171e-12		Actn1	-4.72269	-1.20084	7.87944e-05		Itm2c	3.66242	0.371973	0.00762205		Rnh1	7.11217	1.12315	1.3291e-10
Cldn4	1.74978	4.14823	0.18033		Rasgef1c	0.83818	0.821591	0.643347		Akap11	0.898631	0.158505	0.621183		Celf1	3.99578	0.447577	0.00195454		Rdx	-5.33313	-0.747665	3.50946e-06		Pdcd1	-4.50006	-1.77653	0.000229267		Helz	7.39312	1.0366	1.014e-11		Sec11c	4.71788	0.514229	7.93459e-05		Myl4	3.66174	1.61532	0.00770392		Ndufs4	7.10158	0.978997	1.38935e-10
Igsf3	1.74689	0.852301	0.181057		Hif3a	0.83441	0.570529	0.645606		Gm2044	0.896215	1.122	0.622259		Akap9	3.99078	0.446398	0.00198967		Mrpl33	-5.32873	-0.596945	3.61257e-06		Mpp1	-4.4957	-0.823945	0.000225275		Gatad2b	7.39007	0.933793	1.05802e-11		Sarnp	4.71751	0.544165	7.94829e-05		Aplp2	3.66149	0.689485	0.00764911		Dnajc7	7.09652	0.999724	1.44839e-10
Iqcd	1.74629	1.05579	0.181197		Nars2	0.832059	0.283121	0.646347		Dcaf12l1	0.896062	1.82244	0.622259		Kdm2a	3.98765	0.447326	0.00201189		Zbp1	-5.32245	-0.876736	3.81489e-06		Cd200	-4.49375	-1.29409	0.000232739		Nek7	7.38878	0.907471	1.00292e-11		Ppp2ca	4.70291	0.468372	8.4718e-05		Cysltr1	3.65949	2.6723	0.00793566		Emg1	7.08858	0.821519	1.44839e-10
9330136K24Rik	1.74419	2.01895	0.181935		9330175E14Rik	0.831346	0.190065	0.646733		Gm42851	0.896062	1.82244	0.622259		Psme2	-3.98738	-0.344023	0.00201923		Rsbn1l	-5.32074	-0.544411	3.72362e-06		Diablo	-4.47652	-0.767824	0.000244847		Zfand6	7.38711	0.773446	1.014e-11		Yif1b	4.69675	0.844995	8.74869e-05		Ly96	3.65732	1.19989	0.00780288		Mtpn	7.08217	1.39204	1.85785e-10
Zfp2	1.73952	1.37885	0.183454		Pomgnt2	0.829008	1.28102	0.648148		Platr1	0.896062	1.82244	0.622259		Cox7c	3.98672	0.265695	0.00201482		Ola1	-5.32005	-0.769489	3.76297e-06		Gimap7	-4.47651	-0.49554	0.000244232		Ctsb	7.38594	0.844735	9.9825e-12		Ssb	4.69669	0.471784	8.74869e-05		Nle1	-3.65527	-1.78569	0.00792646		Jak1	7.07746	0.688593	1.41711e-10
Plat	1.73472	2.82631	0.185038		Tsix	0.829008	1.28102	0.648148		Gm26530	0.896062	1.82244	0.622259		Cd2ap	3.98569	0.642274	0.00202059		Ttc14	-5.31917	-0.550312	3.7368e-06		Prdx1	-4.47293	-0.451947	0.000251219		Gbp4	7.38202	0.976002	1.05227e-11		Ncmap	4.69432	1.05492	9.03652e-05		Fam65b	-3.65118	-0.600975	0.00792646		1810058I24Rik	7.07177	1.08406	1.69088e-10
Nrp2	1.73317	20.8889	0.185496		Mterf1a	0.828445	0.144484	0.648456		Acat3	0.896062	1.82244	0.622259		Cdkn2d	3.9811	0.547321	0.00205292		Gpr146	-5.31181	-2.60549	4.22783e-06		Peli1	-4.47178	-0.410524	0.000247132		Wipf1	7.37983	0.855047	1.08153e-11		Atp5a1	4.69394	0.42989	8.82416e-05		Cebpz	-3.65097	-0.631493	0.00792646		Atp6v0d1	7.07046	1.55562	1.85611e-10
Mroh5	1.73317	20.8889	0.185496		A130051J06Rik	0.828441	0.591724	0.648456		Fam188b	0.896062	1.82244	0.622259		S100a10	-3.97999	-0.436053	0.00209791		Eif4a2	-5.31077	-0.465648	3.89568e-06		Tomm22	-4.46673	-0.464301	0.000253305		Ubxn4	7.37978	0.839687	1.06935e-11		Vps29	4.69365	0.614342	8.84026e-05		Il3ra	3.64591	0.996478	0.00805883		Ptpn7	7.06938	1.01199	1.59212e-10
Ntrk1	1.73317	21.8889	0.185496		Syp	0.827211	0.242342	0.6493		Gm26792	0.896062	1.82244	0.622259		Igfbp4	3.97825	1.28993	0.00210129		Phf20l1	-5.30712	-0.88198	3.97632e-06		Tuba1b	-4.46282	-0.839541	0.000269312		Esyt1	7.37683	1.08904	1.1835e-11		Grap	4.68686	0.544725	9.16636e-05		Sh3bgrl3	3.63929	0.280313	0.00819913		Cmip	7.05018	1.13231	1.82798e-10
A930038B10Rik	1.73317	20.8889	0.185496		AW146154	0.825989	0.224385	0.650255		RP23-185P17.2	0.896062	1.82244	0.622259		Rb1	3.97714	0.789802	0.00209196		Add1	-5.30492	-1.02943	4.06593e-06		Ddx24	-4.45692	-0.478885	0.00026411		Ywhab	7.36815	0.659271	1.11709e-11		Sri	4.68657	0.403223	9.08539e-05		Asf1a	-3.63818	-0.94961	0.00825592		Crtc3	7.03793	0.992758	2.0052e-10
Gm3086	1.73317	20.8889	0.185496		Fam109b	0.825161	0.461595	0.650833		Slfn4	0.896062	1.82244	0.622259		Parp3	3.97505	0.612924	0.00209791		Art2b	5.29904	1.52446	4.41749e-06		Gm10073	-4.45582	-0.752356	0.00026559		Agfg1	7.36666	0.953823	1.21189e-11		Kdelr2	4.68611	0.773359	9.09101e-05		H1f0	3.63745	0.964277	0.00825592		Jtb	7.03782	1.10016	2.05446e-10
Itga5	1.72431	0.933221	0.188289		A630023P12Rik	0.824528	0.0938553	0.651206		Tusc5	0.896062	1.82244	0.622259		Scai	3.97288	0.781188	0.00211023		Usmg5	-5.29804	-0.57426	4.18586e-06		Pa2g4	-4.45134	-0.812336	0.000277164		Kdm5a	7.36309	1.02203	1.30449e-11		Eif4e	4.68247	0.69381	9.22663e-05		Svbp	3.6371	0.551488	0.00825148		H13	7.03393	1.08826	2.1201e-10
Gm6471	1.72382	1.82631	0.188475		Hemk1	0.821778	0.220818	0.652596		Gm13565	0.896062	1.82244	0.622259		Anp32a	3.97227	0.249815	0.00210932		Sccpdh	5.29665	2.12948	4.3487e-06		Cbx3	-4.4509	-0.484706	0.000269312		Ubald2	7.35958	1.00423	1.30449e-11		Ndufs6	4.68062	0.520184	9.2595e-05		Srsf7	-3.63665	-0.522394	0.00830684		Dhrs1	7.03337	2.01057	2.67375e-10
Brpf3	1.72111	0.508824	0.189347		Gm6297	0.820964	0.329738	0.653268		Phactr3	0.896062	1.82244	0.622259		Rassf2	3.97145	0.508191	0.00211241		Psma3	-5.29024	-0.437011	4.36066e-06		Rnf7	-4.44942	-0.567998	0.000270857		Slc4a7	7.35418	1.32566	1.39616e-11		Ldha	4.68009	0.490495	9.2595e-05		Gbp7	3.6356	0.445817	0.00825592		Anp32b	7.03232	0.829748	1.94424e-10
Relt	1.72037	0.291675	0.189586		Hist2h3c2	0.820796	0.591724	0.653359		Bcl2a1c	0.896062	1.82244	0.622259		Rfx7	3.97109	0.583101	0.00211354		1810022K09Rik	-5.28699	-0.667778	4.38684e-06		Usp34	-4.44825	-0.649499	0.000272667		Osbpl3	7.35167	1.47717	1.40527e-11		Dynll1	4.67866	0.456805	9.36433e-05		Dkkl1	3.63473	1.71397	0.00834403		Tceb1	7.03121	0.944329	2.04048e-10
Gramd1a	1.72019	0.143496	0.189633		Dbndd2	0.820636	0.298183	0.653422		Gm15728	0.896062	1.82244	0.622259		Atp11b	3.97002	0.385513	0.00211615		Chmp2a	-5.28625	-0.559347	4.37381e-06		Prkar1a	-4.44717	-0.480066	0.000273602		Fyn	7.34199	0.734822	1.35694e-11		Gabpb1	4.67817	0.949446	9.39843e-05		Pus7	-3.62992	-3.18688	0.00868294		Mrpl34	7.02743	1.2288	2.35153e-10
Prkar1b	1.72003	2.56327	0.189703		Mroh1	0.819177	0.161724	0.654108		Gm37401	0.896062	1.82244	0.622259		Ndufa2	3.96599	0.282148	0.00214678		Acat1	-5.2831	-1.19076	4.47952e-06		Cyc1	-4.43846	-0.656692	0.000283557		Slc50a1	7.34146	0.727482	1.39877e-11		Glt28d2	4.67338	2.59343	0.000102358		Gm11808	-3.62958	-0.373143	0.00841706		Sft2d1	7.01802	1.24453	2.44493e-10
Pcyt2	1.71882	0.217014	0.190004		Trav9n-4	0.816556	2.01799	0.656298		Gm42997	0.89568	0.97444	0.622259		Pcmtd1	3.96344	0.525031	0.00216756		Malt1	5.28055	1.12997	4.54597e-06		Tpm3	-4.43785	-0.364936	0.000283557		U2surp	7.33848	0.873344	1.40387e-11		Reep5	4.67053	0.532706	9.6517e-05		Rhog	3.62672	0.48072	0.00847878		Uqcr10	7.01296	0.92811	2.22199e-10
1600020E01Rik	1.7119	0.276842	0.192417		Sh3pxd2b	0.81484	2.69606	0.657055		Amd2	0.89568	0.97444	0.622259		Tns1	3.96303	1.01471	0.0021801		Nt5c	-5.26433	-0.524207	4.91622e-06		Chmp2a	-4.43757	-0.473365	0.000283557		Cyth4	7.33695	0.861601	1.48433e-11		Rnaset2a	4.67013	0.431731	9.6517e-05		Ptp4a2	3.62352	0.344968	0.00856675		Rbm39	7.00678	0.537228	2.23655e-10
Trmt1	1.71078	0.194627	0.192814		Vcan	0.81484	2.69606	0.657055		Plekha4	0.89568	0.97444	0.622259		Gm2000	3.96129	0.735895	0.00218702		Sys1	-5.25989	-0.628373	4.94749e-06		Fam49b	-4.437	-0.444604	0.000283557		Tpm3	7.33592	0.61909	1.46774e-11		Dynlt3	4.66944	0.905436	9.75956e-05		2610020H08Rik	3.62168	1.08374	0.00866477		Diaph1	7.00012	1.10279	2.63326e-10
Hmgcs1	1.71034	0.343223	0.192949		Prph	0.81484	2.69606	0.657055		Trip6	0.89422	0.470452	0.623326		Gm4070	3.95564	0.783942	0.0022362		Ndufa3	-5.25938	-0.511841	4.97538e-06		Tra2b	-4.4368	-0.43103	0.000283557		Dnajc9	7.33395	0.95949	1.50785e-11		Paip2	4.66929	0.430742	9.67386e-05		Ppp1r12a	3.61985	0.429788	0.00866477		Psmb7	6.99524	1.1893	2.7407e-10
Ifitm3	1.70577	1.00318	0.194596		2010110E17Rik	0.81484	2.69606	0.657055		Tc2n	0.891854	3.4074	0.625112		Bri3	3.95528	0.40919	0.00222842		Srsf6	-5.25055	-0.725988	5.27892e-06		Pop5	-4.43595	-0.55838	0.000284059		Adcy7	7.32939	1.16938	1.51539e-11		Aprt	4.66066	0.558867	0.000100667		Chmp5	3.61937	0.488481	0.00866477		Kif21b	6.98127	1.03809	2.83906e-10
Eef1e1	1.7022	0.193347	0.195676		Gm28727	0.814739	0.995621	0.657055		Gm30214	0.890185	1.82244	0.626138		Trim30a	3.95394	0.481458	0.00223664		Adk	-5.24839	-1.61713	5.55184e-06		Snrpb2	-4.43237	-0.812728	0.000290013		Rb1cc1	7.32802	0.944981	1.51807e-11		Wbp5	4.66034	0.896692	0.000101333		Ppia	-3.61834	-0.245586	0.00875534		Ntan1	6.97636	1.07705	3.11253e-10
Ldhd	1.69999	1.00688	0.196452		Masp2	0.814739	0.995621	0.657055		Trav4-2	0.890185	1.82244	0.626138		Trip11	3.95188	0.523869	0.00224968		Use1	-5.24807	-0.650499	5.27892e-06		Trappc6a	-4.42901	-0.749853	0.000292969		Ncmap	7.32593	1.39545	1.64468e-11		Bbip1	4.65817	0.70169	0.000101379		Ran	-3.61821	-0.456604	0.00882119		Rab11a	6.97517	1.31791	3.12563e-10
Ampd3	1.69617	0.439283	0.197506		Ly6a	0.812492	0.0793836	0.658514		Gm15743	0.885709	0.734974	0.628992		Sdhaf1	3.95143	0.460962	0.00224968		Pydc4	-5.2443	-1.76988	5.73339e-06		Sec11c	-4.42718	-0.494741	0.000296557		Rassf1	7.32568	1.06418	1.61299e-11		Tshz2	4.65752	2.10592	0.000106711		Crtc3	3.61747	0.412334	0.00869117		Dnajc15	6.9726	1.41361	4.24817e-10
Cyp2d22	1.69316	0.633661	0.198608		Cnnm2	0.812121	0.386732	0.658758		Hdac4	0.882529	0.139749	0.631237		Tnfrsf9	-3.95074	-0.952214	0.00229528		Arid3b	-5.24421	-2.26544	5.73339e-06		Ndufs4	-4.42409	-0.528169	0.000297734		Mat2b	7.31473	0.747795	1.67008e-11		Satb1	-4.65354	-0.883662	0.000104183		Lmo4	-3.61553	-1.71055	0.00882119		Snw1	6.97002	0.928667	2.98744e-10
Rbm7	1.69056	0.129739	0.199572		Trbv13-3	0.811075	0.802976	0.658914		Asb1	0.881048	0.367535	0.632446		Ftl1	3.94302	0.233632	0.00231811		Ndufb7	-5.24311	-0.485786	5.46572e-06		Psmc6	-4.42364	-0.655377	0.000297866		Ankrd44	7.31333	0.730452	1.65302e-11		Ube2m	4.6527	0.575324	0.000103738		Tceb3	3.61553	0.758874	0.00875534		Selt	6.95736	1.22413	3.34382e-10
Gm26685	1.68906	1.47838	0.200175		Gm8206	0.808706	1.69606	0.658914		Kcnb1	0.879288	0.97444	0.633031		Tra2b	3.94198	0.325788	0.00232593		Tspan32	-5.23693	-0.383648	5.55184e-06		Myeov2	-4.42105	-0.499901	0.000301061		1810037I17Rik	7.30797	0.683412	1.65831e-11		Bax	4.64799	0.504228	0.000105422		Hnrnpab	-3.61423	-0.530879	0.00882119		Rcsd1	6.95637	0.939367	3.22538e-10
Alox5ap	1.68855	2.08934	0.200368		Dmxl2	0.808706	1.69606	0.658914		Gm17096	0.879288	0.97444	0.633031		Pdha1	3.94138	0.446071	0.00232593		Trpc4ap	-5.23621	-0.779003	5.61692e-06		Akr1a1	-4.41765	-0.50019	0.000305827		Uqcrh	7.30706	0.481878	1.66622e-11		Dgka	-4.64766	-0.562219	0.000105332		Sdf4	3.61273	0.362819	0.00882119		Atp5o	6.95583	0.80997	3.11253e-10
D1Ertd622e	1.68843	0.282201	0.200358		Nrg2	0.806253	0.651666	0.658914		Hgfac	0.879026	0.609444	0.633031		Tomm20	3.94097	0.287578	0.00232593		Aprt	-5.23499	-0.670113	5.69455e-06		Tmem173	-4.41134	-0.610778	0.000314092		Cr1l	7.30668	0.952226	1.79307e-11		Calm1	4.64332	0.373661	0.000107428		Dhrs1	3.61168	0.917482	0.00882119		Rsu1	6.94479	1.53968	4.17821e-10
B4galt5	1.68567	0.424207	0.201225		Trav2	0.801304	2.47367	0.658914		Synpo	0.878007	0.393594	0.633566		Chic2	3.93391	0.382785	0.00239503		Rtcb	-5.23484	-0.771574	5.64827e-06		Dgkz	-4.40908	-0.587217	0.000316772		Birc6	7.3058	0.849575	1.78918e-11		Mtx2	4.63578	0.849848	0.000111856		Gimap6	3.61126	0.285469	0.00882119		Lrp10	6.93178	0.935253	3.65332e-10
Rgs19	1.68381	0.135789	0.201891		Matk	0.80042	0.0870453	0.658914		Myo7a	0.87661	0.600045	0.63398		Add1	3.93287	0.551241	0.00240405		Srp19	-5.2277	-0.757369	5.80546e-06		Eif3l	-4.408	-0.665778	0.000318951		Gltscr2	7.30128	0.668856	1.79924e-11		Whsc1l1	-4.63319	-0.499212	0.000112563		Alox8	3.608	1.60869	0.00897488		Klk8	6.92764	0.95099	3.80348e-10
B3gnt3	1.6816	1.05579	0.202478		Plekha4	0.798366	0.848064	0.658914		Cdca5	0.875206	1.122	0.634991		Mcmbp	3.92962	0.476405	0.0024274		Nhp2l1	-5.22691	-0.627581	5.92434e-06		Id3	-4.4067	-0.757905	0.00032148		2020-03-07	7.30049	0.926708	1.83734e-11		Calm3	4.62662	0.564728	0.000115597		Ppp1r18	3.60778	0.348993	0.00888138		Tbcb	6.92527	1.12883	3.96211e-10
Nudt15	1.68064	1.24134	0.202478		AI847159	0.794954	0.757461	0.658914		Acad12	0.873558	0.500509	0.636151		Ccdc64	3.9244	0.76662	0.00247978		Cd96	-5.22691	-0.973534	5.83396e-06		Inpp5f	-4.40577	-0.951449	0.00032148		Mkrn1	7.29074	0.842923	1.93065e-11		Cdc14a	4.62561	1.27729	0.000117755		Cd2	3.6035	0.266922	0.00899755		Arl2bp	6.92447	1.32825	4.76295e-10
Gclm	1.67975	0.223092	0.202576		4932438H23Rik	0.790681	0.386205	0.658914		Jchain	0.873229	1.08547	0.636386		Vps37b	3.92348	0.512874	0.00248118		Ttc39c	5.21923	1.07544	5.97275e-06		Immp1l	-4.40184	-0.81972	0.000325135		Tasp1	7.29028	0.960108	1.92963e-11		Sf3b6	4.62182	0.433762	0.000117755		Wnk1	3.59691	0.40733	0.00923301		Mdh1	6.92195	0.920885	4.24443e-10
Rras2	1.67387	0.254225	0.204617		Ftx	0.7895	0.285776	0.658914		Tube1	0.873151	0.771811	0.636386		Gpr83	3.92289	0.632102	0.00248351		Nxpe3	-5.2192	-0.73251	5.99325e-06		Ndufb4	-4.40146	-0.466138	0.000324723		Parp14	7.28927	0.924725	1.99023e-11		Psmd12	4.61904	0.610353	0.000119376		Ccr6	3.59678	1.14735	0.0093003		2310011J03Rik	6.91669	1.22191	4.38538e-10
Pus3	1.673	0.221062	0.204893		Pcsk9	0.787131	2.69606	0.658914		Trav6-5	0.872141	1.62979	0.637162		Slc25a40	3.91274	0.833173	0.00259107		Akr1b3	-5.21692	-0.624242	6.08796e-06		Rsl24d1	-4.39957	-0.766379	0.000328414		Hspa5	7.28826	0.756358	1.8662e-11		Utp11l	4.61868	0.584209	0.000119517		Usp18	-3.59344	-1.47939	0.00957092		Cox7b	6.91174	0.79078	4.24817e-10
Lrrc8a	1.67196	0.310142	0.205255		Fosl1	0.787131	2.69606	0.658914		Gm16552	0.868972	0.670434	0.639184		Ube2d3	3.90821	0.247101	0.00262771		Rab2a	-5.21661	-0.578897	6.08796e-06		Dars	-4.3967	-0.81049	0.000331919		Psmb1	7.28691	0.541748	1.90656e-11		Cd27	4.6153	0.350289	0.000121184		Psmb8	3.5845	0.232223	0.00960588		Zbp1	6.91057	1.24435	4.63428e-10
Trmo	1.67175	0.340879	0.205294		Gm43690	0.787131	2.69606	0.658914		Tex9	0.866639	0.347658	0.640904		Slc35g1	3.90525	1.01285	0.002666		Pnn	-5.21156	-0.566397	6.22632e-06		Kdm5b	-4.39567	-0.901495	0.000333499		Sptbn1	7.28658	0.952895	2.09018e-11		Acsl5	4.61524	0.816058	0.000121438		Gm37387	-3.58159	-1.44872	0.00984111		Ssu72	6.90558	0.898894	4.42879e-10
Tgtp2	1.67175	0.258544	0.205294		Gm14435	0.787131	2.69606	0.658914		Gm37469	0.865698	0.500509	0.641627		Ubn2	3.9022	0.534879	0.00269466		Actr2	-5.21067	-0.591967	6.26464e-06		Smpdl3a	-4.39393	-0.420354	0.000333933		Brd4	7.2813	0.826232	2.04959e-11		Creb1	4.60455	0.740407	0.00012847		Gadd45b	3.5707	0.945905	0.0100831		Fkbp8	6.89918	0.894524	4.53983e-10
Gm21887	1.66996	0.647969	0.206013		AI661453	0.787131	2.69606	0.658914		Igha	0.863025	1.32494	0.643732		Stat5b	3.90013	0.549382	0.00270884		Sf3b1	-5.21057	-0.425535	6.23894e-06		Tcf25	-4.38458	-0.504048	0.000346217		Csk	7.28124	0.690078	2.04959e-11		Ciapin1	4.60234	0.942456	0.000129348		Fgfr1op2	3.56979	0.460954	0.0101112		Borcs8	6.89839	1.18029	4.63305e-10
Gm8251	1.66382	1.24134	0.208316		Pld6	0.787131	2.69606	0.658914		Slamf7	0.860333	0.342444	0.645523		Xiap	3.89534	0.439387	0.00275777		Cmtm7	-5.21042	-0.74878	6.33184e-06		Mrpl20	-4.38405	-0.642856	0.000347864		Grb2	7.27934	0.722157	2.00704e-11		AU020206	4.60134	0.710442	0.000129348		Cpq	3.56367	1.02357	0.01035		Impa1	6.89769	1.1641	4.66703e-10
Msmo1	1.66121	0.239767	0.209163		Mcidas	0.787131	2.69606	0.658914		Ccsap	0.859691	0.24538	0.646039		Cish	3.89257	0.512555	0.00277655		Ppm1m	-5.20932	-0.940837	6.29288e-06		Ssb	-4.38391	-0.438565	0.000348477		Stk17b	7.27804	0.725955	2.09018e-11		Pacsin1	4.59692	0.794274	0.000132596		Sipa1	3.56245	0.473894	0.01035		Rassf1	6.89535	1.24543	4.94463e-10
Angptl6	1.65201	0.542513	0.212253		Tmbim7	0.787131	2.69606	0.658914		Prr18	0.857772	0.947968	0.647622		Brd4	3.89233	0.403094	0.00277964		Rbm38	-5.20699	-0.618929	6.33184e-06		Ech1	-4.38046	-0.583372	0.000352799		Rab8a	7.27804	0.828823	2.04959e-11		Rnf149	4.59595	0.786835	0.000132596		Arhgef18	-3.55992	-0.81036	0.010507		Baz1a	6.89329	1.20715	4.77321e-10
Lfng	1.64599	0.12086	0.214501		Mia	0.787131	2.69606	0.658914		Gm16158	0.857387	0.620803	0.647883		Asxl2	3.89144	0.394056	0.00278361		Ndufb4	-5.20633	-0.554608	6.33184e-06		Srsf9	-4.37976	-0.672002	0.000352799		Baz2a	7.27102	1.06112	2.359e-11		mt-Cytb	4.59152	0.254401	0.000133482		Comt	3.55732	0.59521	0.0105218		Mif4gd	6.89235	1.1134	4.65565e-10
Tm6sf1	1.64426	0.354001	0.214949		Trpv6	0.787131	2.69606	0.658914		Arhgap19	0.852804	0.822437	0.650492		Shisa5	3.89018	0.198723	0.0027916		Ppp1r14b	-5.20589	-0.752977	6.45877e-06		Dgcr6	-4.37809	-1.32072	0.000360209		M6pr	7.27027	0.972939	2.15756e-11		Fam129a	4.58876	0.800094	0.000135929		Atf6	3.55664	1.3121	0.0105861		Vps29	6.88671	1.06702	4.95718e-10
Hsdl1	1.63782	0.189302	0.217412		Myh11	0.787131	2.69606	0.658914		Pkd1l1	0.851192	0.693154	0.650492		Tprgl	3.88694	0.34903	0.00282473		Nudc	-5.20483	-0.653613	6.44023e-06		Snhg6	-4.37319	-0.896299	0.000364721		Dtnb	7.26251	1.27747	2.38129e-11		Cox7a2l	-4.58654	-0.352185	0.000135929		Cd55	-3.55033	-1.47442	0.0109165		Gstt2	6.87446	2.21036	6.85581e-10
Raly	1.63487	0.085734	0.218593		Fscn1	0.787131	2.69606	0.658914		Pbx1	0.850375	1.82244	0.650492		Klf13	3.88128	0.307266	0.00288322		Ndufb3	-5.20182	-0.56526	6.45239e-06		Ifi47	-4.37176	-0.474604	0.000364721		Tm9sf2	7.2595	0.999364	2.38129e-11		Mydgf	4.58439	0.698253	0.000137891		Hcst	3.55004	0.316354	0.0107721		Vsir	6.87322	1.06869	5.18409e-10
Mex3a	1.63164	0.938781	0.219821		Dnase1	0.787131	2.69606	0.658914		Slc25a10	0.849352	0.416445	0.650492		Sh3kbp1	3.87998	0.387521	0.00289386		Commd8	-5.19892	-0.982305	6.56725e-06		Ndufa11	-4.3688	-0.515955	0.000368296		Ssh2	7.25288	0.861126	2.47381e-11		Hspa9	4.58422	0.68429	0.000137225		Metrnl	3.54649	2.38996	0.011081		Ndufa6	6.86843	0.707512	5.19378e-10
Macrod1	1.63012	0.333909	0.220318		Mcmdc2	0.787131	2.69606	0.658914		Trbv15	0.847015	0.822437	0.650492		Slc25a4	3.87947	0.40817	0.00289386		Plec	-5.19595	-0.925875	6.75386e-06		Sarnp	-4.36745	-0.535851	0.000369894		Ndufb9	7.25051	0.672301	2.43647e-11		Rab8b	4.58309	0.6893	0.000138592		Rpp38	-3.54642	-2.17051	0.0110868		Cd3e	6.86785	0.639184	5.17009e-10
Zmynd10	1.62891	1.03276	0.220723		Chst1	0.787131	2.69606	0.658914		Trav6-2	0.846576	2.17036	0.650492		Sfswap	3.87457	0.611091	0.00295057		Pdcd10	-5.18646	-0.594075	6.92013e-06		Arglu1	-4.366	-0.466542	0.000370593		Nsd1	7.24734	0.920599	2.63778e-11		Cdk17	4.56801	0.809382	0.000149078		Unc5cl	3.54618	0.974067	0.0109429		Ssbp3	6.8677	1.18759	5.5086e-10
Rnf130	1.62553	0.250757	0.22195		4930512B01Rik	0.787131	2.69606	0.658914		Ccdc141	0.846075	0.868241	0.650492		Gimap7	-3.87451	-0.36969	0.00295057		Gtpbp4	-5.18421	-0.896168	7.15788e-06		Ensa	-4.3652	-0.851429	0.000373258		Tnrc6c	7.24557	0.76764	2.59145e-11		Ppp1r14b	4.55955	0.594676	0.000153194		Psen2	3.54539	0.469433	0.0109344		Pabpc1	6.86747	0.703352	5.30039e-10
Lhfpl4	1.62449	1.34088	0.222409		Tcte2	0.787131	2.69606	0.658914		B3gnt9	0.843172	0.620803	0.650492		Fam168a	3.87115	0.757125	0.00299759		Actr10	-5.17933	-0.684243	7.17927e-06		Nudt21	-4.36375	-0.641354	0.000374439		Rtn4	7.24383	0.873475	2.58382e-11		Itpkb	4.55943	0.463714	0.000153194		Gnl2	-3.53965	-0.98487	0.0111749		Aplp2	6.86655	1.49285	6.23914e-10
Tpcn1	1.62311	0.176957	0.222966		Snx22	0.787131	2.69606	0.658914		Gm5796	0.841656	0.519874	0.650492		Arhgap5	3.86594	0.686459	0.00304508		Dkc1	-5.1748	-1.10927	7.54014e-06		Mrps33	-4.36156	-0.561142	0.000376684		Kansl1	7.24138	0.803494	2.58982e-11		Tubb4b	4.55686	0.590046	0.000155161		Sepw1	3.53746	0.257656	0.0111749		Cct2	6.8663	0.84418	5.2293e-10
Ears2	1.62087	0.311194	0.223539		Slfnl1	0.787131	2.69606	0.658914		Gm16894	0.840456	0.389478	0.650691		Chmp5	3.86131	0.422195	0.00309041		Tecpr1	-5.17307	-0.665858	7.47698e-06		Crebbp	-4.3539	-0.604431	0.000388596		Map2k2	7.24059	0.777058	2.58382e-11		Slc25a5	4.55072	0.475407	0.000158928		Fuca2	3.53582	1.00862	0.0112717		Prrc2b	6.86401	1.13035	5.81989e-10
Hspa1b	1.61968	0.239098	0.22394		Gm26599	0.787131	2.69606	0.658914		Chia1	0.839092	2.82244	0.651559		Il17ra	3.85942	0.58289	0.0031131		Esyt1	-5.17176	-0.934365	7.51256e-06		Calr	-4.35379	-0.475628	0.000392269		Senp6	7.2391	0.772308	2.73148e-11		Spock2	4.54948	1.24038	0.000161786		Rorc	3.53525	2.75628	0.011526		Bax	6.86249	0.924151	5.68663e-10
Myzap	1.6142	3.14823	0.226191		Peg3	0.787131	2.69606	0.658914		Creb3l2	0.838399	0.255397	0.651969		Clta	3.85512	0.248909	0.00315195		St8sia1	-5.16929	-2.8216	8.26242e-06		Fam65b	4.3537	0.52928	0.000386788		Cd82	7.23882	0.86357	2.55595e-11		Klhl6	-4.54842	-0.71735	0.000161786		Wdr12	-3.53334	-1.30261	0.0114753		Cript	6.85761	1.10955	6.2906e-10
Kti12	1.61176	0.176616	0.226981		Retn	0.787131	2.69606	0.658914		Pbx4	0.837205	0.291246	0.652313		Acap1	3.85489	0.382588	0.00315195		Gng5	-5.16863	-0.35838	7.56111e-06		Rac1	-4.35312	-0.410416	0.000389131		Akap9	7.23447	0.925835	2.85062e-11		Cox5b	4.54467	0.417977	0.000162305		Inpp5d	3.52728	0.508175	0.011526		Gnb1	6.84961	0.952865	6.37664e-10
4931428F04Rik	1.6113	0.938781	0.227186		Gm12999	0.787131	2.69606	0.658914		RP23-207N5.5	0.836681	1.23748	0.652313		Aimp1	3.85487	0.378789	0.00315195		2020-09-06	-5.16773	-0.648826	7.57105e-06		Tomm40	-4.3506	-0.867587	0.000399348		Ndufb11	7.2308	0.594137	2.69139e-11		Rbm8a	4.5445	0.470253	0.000162305		Rpp14	-3.52309	-1.10308	0.0117825		Cdk2ap2	6.84703	0.660981	5.94491e-10
1700112D23Rik	1.60976	2.82631	0.227817		Gm10912	0.787131	2.69606	0.658914		Kazald1	0.836681	1.23748	0.652313		Rnf114	3.85006	0.479281	0.00321056		Ppib	-5.16514	-0.421172	7.72041e-06		S1pr4	4.34968	0.608944	0.000392192		Ppig	7.22977	0.757934	2.74905e-11		Gabarapl1	4.54012	1.53177	0.000170282		Fam46a	3.51892	0.810559	0.0118656		AI413582	6.8455	1.39685	6.68574e-10
Ascl3	1.60976	2.82631	0.227817		A630072L19Rik	0.787131	2.69606	0.658914		Tssk6	0.836681	1.23748	0.652313		Gpr18	3.84711	0.586703	0.00324432		Cmah	-5.1559	-1.83272	8.50108e-06		Gcsh	-4.34961	-2.16811	0.000412274		Asxl1	7.22933	1.13283	2.98052e-11		Hadha	4.53627	0.647898	0.000168445		Gramd3	-3.51828	-1.10511	0.0119816		Aip	6.84355	1.05208	6.05714e-10
Adat1	1.60873	0.362738	0.228052		Clmp	0.787131	2.69606	0.658914		Prss53	0.836681	1.23748	0.652313		Tpi1	-3.84447	-0.748646	0.00331159		Adss	-5.15299	-0.749496	8.25545e-06		Lta	-4.3415	-1.62761	0.000423362		Sf1	7.22876	0.907444	2.91163e-11		Cox7a2	4.53286	0.392161	0.000170578		Gnptg	3.51215	0.734682	0.0121373		Srp14	6.83439	0.782899	6.68574e-10
Banp	1.60825	0.173749	0.228214		Btbd18	0.787131	2.69606	0.658914		Liph	0.836681	1.23748	0.652313		Ccnd2	3.84092	0.32197	0.00331159		Mier1	-5.15273	-0.595766	8.17503e-06		Hspa9	-4.33786	-0.778627	0.000419288		Pafah1b1	7.22791	0.74245	2.87882e-11		Ehd1	4.532	1.26213	0.000174812		Mbd2	3.51094	0.347881	0.0121373		2020-09-15	6.83425	0.779507	6.55981e-10
C1galt1	1.60782	0.172769	0.228382		Ifnk	0.787131	2.69606	0.658914		D030055H07Rik	0.836681	1.23748	0.652313		Sla2	-3.83745	-0.682843	0.00335848		Atg3	-5.1428	-0.863576	8.55502e-06		Ldhb	-4.33226	-0.739874	0.000423362		Zbtb38	7.21811	1.05607	3.13815e-11		Tmem173	4.53078	0.589674	0.000173291		Ahsa1	-3.51025	-0.428602	0.0122168		Unc119	6.83311	1.44995	7.45276e-10
Kremen1	1.60623	0.462422	0.229033		4930524B15Rik	0.787131	2.69606	0.658914		Gm26625	0.836681	1.23748	0.652313		Sec61b	3.83705	0.267325	0.00335807		Cnbp	-5.14088	-0.424463	8.64049e-06		Pfdn4	-4.32704	-0.983328	0.000433485		Sumo2	7.2164	0.538292	2.945e-11		Emc10	4.5303	0.59742	0.000173291		St14	3.50903	1.42371	0.0122789		Gnai3	6.83275	1.12351	6.8127e-10
Mylip	1.60396	0.222965	0.229934		Cyp26a1	0.787131	2.69606	0.658914		Cd22	0.83649	0.483635	0.652313		Rasa3	3.83669	0.661886	0.00335848		Gm4955	-5.13828	-1.15715	8.94954e-06		Lamtor2	-4.32526	-0.434771	0.000433672		Cap1	7.21544	0.745134	3.04382e-11		Agpat3	4.52664	0.577093	0.000174812		Lamtor5	3.50825	0.434708	0.0122168		Rnf138	6.82961	1.36611	7.88134e-10
Gm43647	1.60381	1.41127	0.229948		Cd200r2	0.787131	2.69606	0.658914		Bbof1	0.836324	0.896438	0.652313		Tbxa2r	3.83347	0.593826	0.00339741		Myeov2	-5.13291	-0.578984	8.9722e-06		Dctn3	-4.32328	-0.53662	0.000437854		Pmepa1	7.21059	1.06889	3.33352e-11		Coa3	4.52409	0.551538	0.000176985		Cct7	-3.50731	-0.384555	0.0123137		Manf	6.82778	0.99326	7.15823e-10
Dusp10	1.60218	0.25145	0.230584		Gm16235	0.787131	2.69606	0.658914		Twist2	0.836324	0.896438	0.652313		Gm20692	3.83195	1.96823	0.00344707		Sdhb	-5.13183	-0.609055	9.01193e-06		Npm3	-4.321	-0.69272	0.000444997		Tmsb4x	7.20969	0.424267	3.13046e-11		Ddx54	4.52327	0.655007	0.000177015		Gbp2b	3.5063	1.44946	0.0124861		mt-Atp6	6.82595	0.436917	6.7789e-10
Aldh1l1	1.59906	1.16334	0.231788		Plcg2	0.787131	2.69606	0.658914		Gm26852	0.836324	0.896438	0.652313		Hspa5	-3.82631	-0.390678	0.00349544		Hp1bp3	-5.12974	-0.635278	9.09215e-06		Crlf2	-4.31663	-0.599716	0.000452179		Glmp	7.20474	0.959247	3.43909e-11		Eif2s1	4.52094	0.607671	0.000178223		Eif2ak2	3.50243	0.750501	0.0124356		Tmed9	6.81526	0.838255	7.45276e-10
1700097N02Rik	1.59895	0.328055	0.231788		Olfr433	0.787131	2.69606	0.658914		Gm19902	0.836324	0.896438	0.652313		Ahr	-3.82195	-0.94145	0.00357444		Prmt1	-5.12448	-0.816619	9.54922e-06		Zfp950	-4.31573	-0.858315	0.000452457		Rab5c	7.20309	0.806974	3.33352e-11		Rab10	4.52088	0.541905	0.000179134		Zbtb8os	3.50141	0.546565	0.0124701		Psap	6.80581	0.958879	7.86062e-10
A530021J07Rik	1.5988	2.24134	0.231944		4930540M05Rik	0.787131	2.69606	0.658914		Slc2a12	0.8363	0.63481	0.652313		Huwe1	3.82052	0.406114	0.00355774		Vps37b	-5.12359	-0.979905	9.34523e-06		Ndufa12	-4.31516	-0.564964	0.000454859		Nt5c	7.20251	0.664763	3.27671e-11		Gpr171	4.52029	1.25327	0.000181762		Eef1a1	-3.49883	-0.235426	0.0125529		Pttg1	6.79522	1.17579	8.91284e-10
Gm43352	1.59798	0.671978	0.232135		4930551O13Rik	0.787131	2.69606	0.658914		Dtx3	0.835986	0.116215	0.652459		Ccm2	3.81609	0.357284	0.0036108		Ralbp1	-5.11654	-0.611698	9.73188e-06		Nono	-4.31263	-0.472349	0.000454859		Smarca5	7.20026	0.8625	3.38347e-11		Slc22a15	4.52002	1.11264	0.000180662		Gpi1	3.49855	0.31599	0.0125434		Vdac3	6.79142	1.19894	9.25646e-10
Irak3	1.5889	0.589267	0.234734		RP24-492L15.6	0.787131	2.69606	0.658914		Gm27200	0.835272	0.500509	0.652916		Eva1b	3.81559	0.414689	0.0036108		Atp11b	-5.11056	-0.634635	9.91642e-06		Ndufb7	-4.31111	-0.396617	0.000459089		A630023P12Rik	7.20019	1.07166	3.52192e-11		Zc3h12a	4.51925	1.14738	0.00018308		Gm19585	3.498	1.12594	0.0126512		Eif3e	6.78852	0.705339	8.80869e-10
Chst10	1.58388	0.284511	0.236738		Wnt16	0.787131	2.69606	0.658914		Gm30948	0.833626	0.359465	0.654153		Zfp292	3.81432	0.36884	0.00362599		Hist1h2bc	-5.10933	-2.86726	1.09564e-05		Atxn7l3b	-4.31037	-0.555437	0.000458198		Kcnq1ot1	7.19746	0.912091	3.58435e-11		Apex1	4.51837	1.07965	0.000180662		Eno1	-3.49642	-0.433049	0.0126512		Ankrd44	6.78421	0.900071	9.31523e-10
Gm13822	1.57916	0.767412	0.23865		Tspo2	0.787131	2.69606	0.658914		Gm5914	0.831074	0.1802	0.655555		Trp53	3.81257	0.372819	0.00364549		Ncoa3	-5.10802	-0.820807	1.01259e-05		Sh2d2a	-4.31002	-0.622935	0.000462454		Ttc39b	7.19691	0.931683	3.50554e-11		Mbd3	4.51287	0.582136	0.000183258		Derl2	3.4923	0.540316	0.0127665		4930453N24Rik	6.77692	1.20558	1.0315e-09
Dna2	1.57894	0.968325	0.23868		Gm16085	0.787131	2.69606	0.658914		Plekha7	0.830955	0.289942	0.655584		Phf1	3.81201	0.481581	0.00364892		Eif4b	-5.10442	-0.596034	1.02066e-05		Pfdn1	-4.30909	-0.6584	0.000461689		Taok3	7.19583	1.04132	3.73119e-11		Stk32c	4.51105	2.01511	0.000191142		Cbr1	3.48977	0.549366	0.0128975		Eif3c	6.77679	0.874045	9.02202e-10
Pym1	1.57639	0.146412	0.239446		Cml2	0.787131	2.69606	0.658914		Smim10l2a	0.830899	0.387051	0.655584		Matr3	3.81036	0.335151	0.00366558		Hsp90aa1	-5.10363	-0.596015	1.04973e-05		E130308A19Rik	-4.30769	-1.94572	0.000475679		Tnfaip8	7.18029	0.791908	3.84133e-11		Ywhae	4.50947	0.480002	0.000186008		Aph1a	3.48849	0.644173	0.0129151		Snapc5	6.77197	1.20376	1.01307e-09
Them6	1.57075	0.173382	0.241695		1700001C19Rik	0.787131	2.69606	0.658914		Trim2	0.830145	0.334151	0.656119		Lta4h	3.80609	0.497127	0.00372678		Psmg4	-5.0919	-0.85823	1.09621e-05		Ndufb2	-4.30654	-0.640051	0.000466813		Mgst2	7.17963	0.858389	3.96562e-11		Ywhah	4.5086	0.495622	0.000186358		Gapdh	3.47531	0.316105	0.0135664		Srp9	6.77141	0.767758	9.91505e-10
Tubb2b	1.56885	0.972157	0.242595		Vmn2r30	0.787131	2.69606	0.658914		Npdc1	0.829449	0.568681	0.656503		Atp5l	3.80074	0.254336	0.00379455		Epb41l4aos	-5.09151	-0.96454	1.09621e-05		Slc9a3r1	-4.29294	-0.428029	0.000491453		Ctcf	7.17586	0.793311	4.21654e-11		Epcam	4.50638	0.95275	0.000189844		Sco2	-3.47354	-1.17708	0.0136679		Psmb9	6.76596	0.818411	1.11193e-09
Cacnb3	1.56624	2.82631	0.243812		Gm14252	0.787131	2.69606	0.658914		Stx3	0.827668	1.01508	0.657733		Sgpp1	3.79863	0.686359	0.00383199		Prelid1	-5.0902	-0.576828	1.09702e-05		Rwdd1	-4.2926	-0.493398	0.000494399		Scaf11	7.17571	0.949749	4.13564e-11		Cks2	4.50204	1.28613	0.00019193		Pet100	3.47297	0.479343	0.0136211		Ccs	6.75825	1.1318	1.11193e-09
Prrt3	1.56591	2.14823	0.243812		1700029M03Rik	0.787131	2.69606	0.658914		Gm11464	0.827668	1.01508	0.657733		Paip2	3.79724	0.293829	0.00383557		Nedd8	-5.08734	-0.47023	1.10885e-05		Ctsb	-4.28876	-0.579349	0.000503259		H2-M3	7.17559	0.882381	3.93681e-11		Dbi	4.50033	0.603373	0.00019356		Ufc1	3.47229	0.495285	0.0136271		Icos	6.75218	1.10676	1.02623e-09
Zglp1	1.56589	1.19827	0.243812		Stmn4	0.787131	2.69606	0.658914		Gm12976	0.827668	1.01508	0.657733		Fam193a	3.79167	0.571432	0.00392341		Rbm25	-5.08374	-0.455787	1.12115e-05		C1d	-4.2884	-0.762107	0.000499875		Hip1r	7.17513	1.59137	4.51712e-11		Adap1	4.49716	1.1708	0.000198152		Gata1	-3.4686	-1.82503	0.0139309		Pim1	6.75191	1.01123	1.14466e-09
Pam	1.56429	0.439283	0.244455		AF251705	0.787131	2.69606	0.658914		4933408B17Rik	0.827304	0.549419	0.657944		Fam208a	3.79073	0.582272	0.00393203		Fkbp3	-5.06965	-0.491124	1.20962e-05		Timm17b	-4.28593	-0.80579	0.000504523		Entpd1	7.17319	1.52167	4.44534e-11		Psmb7	4.49174	0.61568	0.000199826		Rnh1	3.46811	0.453196	0.0137918		Cetn2	6.75056	1.08984	1.11633e-09
Wbscr27	1.56415	0.504378	0.244467		Csf2rb2	0.787131	2.69606	0.658914		Bzrap1	0.826368	0.254753	0.658598		Dnajc3	3.78786	0.374981	0.00396299		Rrs1	-5.06062	-1.66152	1.32127e-05		Lap3	-4.28561	-1.61531	0.000513641		Tia1	7.17254	0.939916	4.0696e-11		1110008F13Rik	4.48897	0.528088	0.000202274		Sar1b	3.46495	0.462699	0.0139309		Thoc7	6.73967	1.05352	1.18269e-09
Car12	1.56057	0.755917	0.245827		Iqgap3	0.787131	2.69606	0.658914		Il11ra1	0.826261	0.412153	0.658598		Midn	3.78543	0.620839	0.00400618		Sfr1	-5.05307	-0.658721	1.31933e-05		Slc25a11	-4.27903	-0.619463	0.000516713		Os9	7.16922	0.992727	4.4345e-11		Arf3	4.48602	0.69106	0.000205361		Lamc1	3.46436	0.974924	0.0139603		Tuba1a	6.73713	1.2448	1.3832e-09
Boll	1.55922	0.978309	0.246414		Rab13	0.787131	2.69606	0.658914		Kif13a	0.826224	0.237475	0.658598		Ahctf1	3.77716	0.651532	0.00413036		Grpel1	-5.05294	-0.732231	1.32339e-05		Nktr	-4.27707	-0.464346	0.000521252		Khdrbs1	7.16676	0.745006	4.10194e-11		Nfkbib	4.48323	0.82766	0.000207152		Rras	3.46152	0.805373	0.0140856		Gimap7	6.7359	0.961422	1.34715e-09
Epb41	1.55807	0.221847	0.246805		Gm29570	0.787131	2.69606	0.658914		Hsh2d	0.819422	0.37313	0.662647		Exoc6	3.77555	0.888866	0.00416098		Syncrip	-5.05255	-0.81511	1.32387e-05		Chrac1	-4.27375	-0.610459	0.000527089		Ccdc12	7.16458	0.706167	4.22479e-11		Ddost	4.48275	0.564816	0.000207152		Hlf	3.46011	2.38189	0.0143699		Mrps18c	6.73157	1.01159	1.20607e-09
Srebf2	1.55757	0.168459	0.246965		Dnaaf1	0.787131	2.69606	0.658914		Scamp1	0.816482	0.447398	0.664412		R3hdm1	3.7725	0.414797	0.00418915		Scml4	-5.04687	-1.5208	1.38675e-05		AY036118	-4.27343	-0.378769	0.000527089		Ccnl2	7.1638	0.803309	4.21654e-11		Tap1	4.47883	0.453759	0.000210868		Ptprc	3.45846	0.254734	0.014177		Ppp2cb	6.72824	1.22743	1.35332e-09
Aldh2	1.55667	0.350727	0.247165		9330154K18Rik	0.787131	2.69606	0.658914		BC051077	0.815947	0.524757	0.664837		Cast	3.77232	0.508922	0.00418915		Gbp5	-5.04668	-1.30723	1.38675e-05		Klk8	-4.27337	-0.534069	0.000527097		Rasa1	7.16274	1.02559	4.48145e-11		Utf1	4.47538	2.18244	0.00021925		Skap2	3.45704	1.00343	0.0143099		Hprt	6.71576	0.974327	1.35446e-09
Gcm2	1.55546	1.82631	0.2476		Tmem132b	0.787131	2.69606	0.658914		1700029I15Rik	0.813127	0.63481	0.667051		Rap2b	3.76878	0.661451	0.00424616		Rabac1	-5.04474	-0.362114	1.35097e-05		Rora	4.27179	0.842742	0.000528012		Luc7l3	7.15865	0.791574	4.44534e-11		Itgae	4.47423	0.723011	0.000215193		Samsn1	3.45476	0.628063	0.0143904		Jakmip1	6.71352	1.02717	1.39516e-09
Dpf1	1.55546	1.82631	0.2476		1700003F12Rik	0.787131	2.69606	0.658914		Gm13205	0.812914	0.368719	0.667051		Ywhaz	3.76717	0.342952	0.00426167		Tra2b	-5.03688	-0.488477	1.40599e-05		Rsf1	-4.26853	-0.691365	0.000539478		Rbbp6	7.15862	0.831105	4.48145e-11		Plgrkt	4.47231	0.489679	0.000215472		Fam234a	3.45418	1.66568	0.0144888		H2afy	6.7067	0.768197	1.39392e-09
Zfp809	1.55524	0.430821	0.247617		Apom	0.787131	2.69606	0.658914		Ccdc142os	0.81027	0.524757	0.667051		Tax1bp1	3.76622	0.327922	0.00426706		Trmt1	-5.03308	-1.27104	1.46424e-05		Pigp	-4.26698	-0.79833	0.000541061		Rcsd1	7.14921	0.766433	4.65278e-11		Arid5b	4.47065	0.74044	0.000218406		Mdp1	3.45152	0.479555	0.0144741		Aimp1	6.70434	0.961575	1.43508e-09
Yae1d1	1.55486	0.278818	0.247737		Tmem265	0.787131	2.69606	0.658914		Fzd6	0.810243	1.23748	0.667051		Irf2	3.76568	0.347126	0.00427047		Mpc2	-5.02987	-0.656449	1.45366e-05		Rbmxl1	-4.26589	-0.745168	0.000542069		Atp5e	7.14793	0.522779	4.51738e-11		Fabp5	4.46944	1.20651	0.00021925		Scp2	3.44547	0.324674	0.0147286		Carhsp1	6.70308	3.52383	2.57955e-09
B230369F24Rik	1.55358	0.913769	0.248253		B230312C02Rik	0.787131	2.69606	0.658914		Galc	0.808845	0.670434	0.667051		Abcg1	3.76505	0.531346	0.00427297		Snx3	-5.02445	-0.465254	1.50248e-05		Fdx1	-4.26466	-0.998586	0.000548394		Trip11	7.14684	1.11521	5.19135e-11		Btla	4.46881	0.993031	0.000221622		Eif5b	-3.44395	-0.490464	0.0148395		Sh2d3c	6.70279	1.50912	1.62603e-09
Fpgs	1.55111	0.419489	0.249302		Gm15853	0.787131	2.69606	0.658914		Ryr2	0.807043	0.896438	0.667051		Ccdc109b	3.76354	0.860504	0.00430162		Iqgap2	-5.02305	-1.47249	1.55918e-05		Mrpl14	-4.26012	-0.689182	0.000552821		Sigirr	7.14654	0.940141	4.86806e-11		P4hb	4.4646	0.792855	0.000222569		Aplp1	3.44331	1.02401	0.0148395		Sys1	6.70056	0.920411	1.53509e-09
D730003I15Rik	1.55053	0.320932	0.249551		Gm37068	0.787131	2.69606	0.658914		Plscr1	0.805554	0.144962	0.667051		Gpr34	3.76344	0.754152	0.0043023		Nt5e	5.0163	0.625419	1.53893e-05		Ldb1	-4.25995	-0.565507	0.000552821		Il21r	7.14026	0.777394	4.92879e-11		Ap2s1	4.45223	0.596551	0.000235443		Sema4b	3.44315	0.687253	0.0148395		Mthfsl	6.69915	1.2904	1.60206e-09
Scarb1	1.54508	0.504378	0.251825		A830052D11Rik	0.787131	2.69606	0.658914		Cd8a	0.803696	2.82244	0.667051		Cep97	3.76173	0.761022	0.00432866		Nfia	5.01364	2.05391	1.64365e-05		Ube2r2	-4.25745	-0.596411	0.000558684		Rnf10	7.13626	0.937963	5.11287e-11		Smg6	4.45155	0.756715	0.000236097		Galnt6	3.44273	0.571697	0.0148395		Cxcr3	6.69741	1.53187	1.79213e-09
Fbxo47	1.54497	1.65638	0.251881		Cubn	0.787131	2.69606	0.658914		Tmem89	0.803696	2.82244	0.667051		Pink1	3.76029	0.592005	0.00433574		Dynll1	-5.01282	-0.482002	1.58412e-05		Ppat	-4.25298	-1.22037	0.000574979		Eif3a	7.13556	0.731831	4.95617e-11		Sdf2l1	4.45087	1.06541	0.000238901		Cdca7	-3.44144	-2.62454	0.0153198		Ptpn1	6.69403	0.791804	1.40772e-09
C030034I22Rik	1.54136	0.290253	0.253238		Klf12	0.787131	2.69606	0.658914		1700001C19Rik	0.803696	2.82244	0.667051		Sardh	3.75595	2.1519	0.00447137		Mdh2	-5.01009	-0.483318	1.60693e-05		Hspa14	-4.2527	-0.708273	0.000569441		Cmtm7	7.13323	0.914855	5.30166e-11		Mgmt	4.44922	1.49892	0.00024579		Mfsd4	-3.43852	-1.05482	0.0150931		TdTomato	6.69051	1.43026	1.88048e-09
B130006D01Rik	1.54112	0.35682	0.253327		Prkag2os1	0.787131	2.69606	0.658914		Tro	0.803696	2.82244	0.667051		Hnrnpa1	3.75389	0.362984	0.00443398		Jun	-5.00864	-0.713099	1.60693e-05		Ptpn6	-4.25197	-0.640994	0.000574368		Dst	7.13268	1.33266	5.60415e-11		Ndufa12	4.44455	0.551201	0.000242042		Sin3b	3.43408	0.413635	0.0152193		Zfos1	6.68527	1.1989	1.78109e-09
Tax1bp3	1.54001	0.294981	0.253787		Gm9951	0.787131	2.69606	0.658914		Mest	0.803696	2.82244	0.667051		Acbd6	3.75126	0.434251	0.00447137		Ifngr2	-5.00821	-1.6786	1.65839e-05		Zmiz2	-4.24943	-0.735812	0.000575808		Ipcef1	7.12988	0.798558	5.23761e-11		Fam101b	-4.44044	-1.32902	0.000250348		2700060E02Rik	3.43132	0.325811	0.0153198		Cox17	6.68405	0.941124	1.73147e-09
Gm10130	1.53851	1.19827	0.254366		4732463B04Rik	0.787131	2.69606	0.658914		4930562C15Rik	0.803696	2.82244	0.667051		Cxxc1	3.74716	0.595353	0.0045396		Stip1	-5.00482	-0.723824	1.64033e-05		Ncoa7	-4.24768	-0.937813	0.000586323		Atp2b1	7.12606	0.867639	5.45476e-11		Laptm5	4.43895	0.328782	0.000247261		Cited4	3.42776	2.80431	0.0158666		Abhd17a	6.67301	1.10667	1.883e-09
Cdc42se1	1.53426	0.108942	0.256119		P3h4	0.787131	2.69606	0.658914		Gm26686	0.803696	2.82244	0.667051		Ndufb11	3.74444	0.275118	0.00457166		Sesn1	-5.00356	-1.12578	1.66838e-05		Tgfb1	-4.24718	-0.514092	0.000583927		Hnrnpul1	7.12191	0.936016	5.63687e-11		Ublcp1	4.43681	1.13513	0.000253812		Gdi2	3.42293	0.344089	0.0157693		Eif3l	6.67261	1.14771	1.88048e-09
Efcab9	1.53338	1.24134	0.256238		Ugt1a6a	0.787131	2.69606	0.658914		Csf3r	0.803696	2.82244	0.667051		Cd9	3.74225	0.579175	0.00460747		Rab8a	-5.00347	-0.689207	1.63958e-05		Romo1	-4.24675	-0.583043	0.000581192		Ywhae	7.12063	0.713835	5.42401e-11		Ebna1bp2	4.43611	0.622199	0.000249258		2610204G07Rik	-3.42031	-1.71877	0.0161258		Rbms1	6.66976	1.09285	1.85656e-09
Usp36	1.52986	0.235002	0.257811		Gm5532	0.787131	2.69606	0.658914		Cacng8	0.803696	2.82244	0.667051		Gapvd1	3.74221	0.559753	0.00460945		Aars	-5.00104	-0.855657	1.66472e-05		Ncmap	-4.24498	-1.13336	0.000588687		S100a10	7.11912	0.806328	5.32798e-11		Med15	4.4251	0.859859	0.000262811		Spata13	3.41885	0.553261	0.015968		Frg1	6.66203	0.944713	1.8984e-09
Gm26545	1.52481	1.03276	0.260209		Gm44175	0.787131	2.69606	0.658914		Tmem25	0.803696	2.82244	0.667051		Gm13212	3.74152	0.959433	0.00462575		Psmb5	-4.99924	-0.542404	1.67505e-05		Wdr43	-4.24438	-0.799139	0.000592337		Cnp	7.11346	0.72519	5.83778e-11		Prkcq	-4.42026	-0.581597	0.000266771		Mettl13	-3.41774	-2.48848	0.0163569		Sfpq	6.65937	0.802489	1.79213e-09
Rala	1.52305	0.138774	0.260917		Tmem130	0.787131	2.69606	0.658914		Gm27011	0.803696	2.82244	0.667051		Dcaf17	3.7397	0.634218	0.0046386		Fkbp4	-4.99801	-0.606972	1.6957e-05		Srp72	-4.23746	-0.640192	0.000601211		Numa1	7.10539	0.936108	6.38595e-11		Ankrd12	4.4152	0.431229	0.000273147		Plekhb2	3.41627	0.689298	0.0161252		Acads	6.65339	1.36721	2.14704e-09
Ppm1j	1.52186	0.238999	0.261357		Gm9047	0.787131	2.69606	0.658914		Gm9047	0.803696	2.82244	0.667051		Ssh1	3.73861	0.563342	0.00464652		Hnrnpu	-4.99235	-0.590907	1.72528e-05		Swi5	-4.23687	-0.463032	0.000602952		Cox6b1	7.10353	0.5287	5.97679e-11		Ppp1ca	4.41337	0.396714	0.000274974		Mycbp2	-3.40284	-0.371606	0.0168422		Lat	6.65034	0.620877	1.84466e-09
Thada	1.51505	0.226589	0.26409		Pde6b	0.787131	2.69606	0.658914		Ctf2	0.803696	2.82244	0.667051		Podnl1	-3.73726	-1.15942	0.00469134		1810037I17Rik	-4.99105	-0.536042	1.72528e-05		Il16	-4.23508	-0.428742	0.000602952		Abca2	7.10287	1.30918	6.80941e-11		Rwdd1	4.40954	0.502561	0.000279988		Dnajb13	3.39358	1.31662	0.0174575		Tap2	6.64548	0.855545	2.16973e-09
Gm36888	1.51125	1.65638	0.265873		Gm16341	0.787131	2.69606	0.658914		Gm14401	0.803696	2.82244	0.667051		Baz1b	3.73682	0.510785	0.00468242		Sms	-4.9904	-0.84084	1.74554e-05		Ppid	-4.23399	-0.798425	0.000611094		Ier5	7.10238	0.706121	6.19472e-11		Cdk6	4.4072	0.946181	0.000283707		Tmbim4	3.39346	0.431246	0.0173608		Hadh	6.64354	1.37346	2.30459e-09
Tlr7	1.51091	0.41913	0.265944		Gm11457	0.787131	2.69606	0.658914		H2-Eb2	0.803696	2.82244	0.667051		Tbc1d1	3.73564	0.457332	0.00468804		Ifi27l2a	-4.97679	-0.680652	1.90033e-05		Apoa1bp	-4.23325	-0.858693	0.000611094		Eva1b	7.10198	0.836646	6.12077e-11		Ddx24	4.40602	0.438463	0.000282719		Borcs6	3.39173	0.796416	0.0174575		Akap13	6.63675	0.670021	1.99257e-09
Blvrb	1.50882	0.268143	0.266759		Gm37422	0.787131	2.69606	0.658914		G430049J08Rik	0.803696	2.82244	0.667051		Cyld	3.73075	0.446099	0.00476494		Cuta	-4.97526	-0.769992	1.86632e-05		Grpel1	-4.22985	-0.611013	0.00061792		Uqcrb	7.10061	0.612928	6.12077e-11		Rars	4.40415	0.778499	0.00028494		Cd200r1	3.39144	0.912509	0.0175236		Vrk1	6.63556	1.2432	2.32505e-09
Cct7	1.50751	0.080238	0.267399		Pld4	0.787131	2.69606	0.658914		Arhgap23	0.803696	2.82244	0.667051		Rsrc2	3.72726	0.326958	0.00482209		Raly	-4.97119	-0.50198	1.90518e-05		Ubxn1	-4.22639	-0.40068	0.000624236		Slc1a5	7.09823	0.935798	6.30484e-11		Ap3b1	4.39921	0.756336	0.000291642		Unkl	3.38844	0.908894	0.0176397		Psmb5	6.63287	0.831543	2.11578e-09
Slc38a2	1.5055	0.126778	0.268262		Mybpc3	0.787131	2.69606	0.658914		Tns4	0.803696	2.82244	0.667051		Itga4	3.7246	0.409668	0.0048727		Hdac1	-4.96923	-0.695165	1.91891e-05		Dalrd3	-4.22455	-1.04876	0.000632523		Rnf187	7.09548	0.719303	6.54767e-11		Rbbp7	4.3983	0.59742	0.00029241		Klhl36	3.38644	1.01932	0.0177582		Sptlc2	6.63266	1.41264	2.31273e-09
Hdc	1.50125	1.82631	0.268953		P2rx5	0.787131	2.69606	0.658914		Mkrn3	0.803696	2.82244	0.667051		Supt6	3.72318	0.565095	0.00488801		Smg1	-4.96219	-0.83689	1.99352e-05		Ndufa8	-4.2235	-0.502468	0.000630994		Arf1	7.09147	0.625921	6.7455e-11		Ormdl1	4.39723	0.750766	0.000294502		mt-Atp8	-3.38402	-0.552317	0.0178671		Cstb	6.63051	1.20469	2.17457e-09
Gm26839	1.50121	3.41127	0.268953		Celf6	0.787131	2.69606	0.658914		Hs3st5	0.803696	2.82244	0.667051		Kif21b	3.72212	0.396581	0.00490025		Gbp2b	-4.95419	-3.68322	2.2807e-05		Tmed10	-4.2204	-0.549131	0.000638016		Myo1f	7.09143	1.58295	6.96016e-11		Pnkd	4.39656	0.773273	0.000297426		Ebna1bp2	-3.38232	-0.604616	0.0180098		Pcbp1	6.62808	0.832374	2.11516e-09
Slfn5os	1.50121	3.41127	0.268953		Gm13150	0.787131	2.69606	0.658914		Gm13856	0.803696	2.82244	0.667051		Znrf2	3.71769	0.443283	0.00497572		Aurkaip1	-4.95332	-0.574721	2.06716e-05		Chic2	-4.21771	-0.521153	0.000642734		Mknk2	7.08652	0.838355	6.90223e-11		Uba1	4.39382	0.63393	0.000297419		Mrpl54	3.37961	0.475814	0.0180289		Tceb3	6.62581	1.60408	2.61853e-09
Irgc1	1.50121	3.41127	0.268953		Gm44287	0.787131	2.69606	0.658914		Stmn4	0.803696	2.82244	0.667051		Eif5	3.7167	0.30898	0.00499754		2020-03-02	-4.95222	-0.572433	2.07387e-05		Fbxl6	-4.21339	-0.882042	0.000659902		Cnn2	7.07057	0.558656	7.58886e-11		Cdk2ap1	4.39321	0.61116	0.00029656		Actg1	3.37911	0.320914	0.0180406		Cib1	6.62563	1.32054	2.58694e-09
Gm27240	1.50121	3.41127	0.268953		Psd2	0.787131	2.69606	0.658914		A1cf	0.803696	2.82244	0.667051		Tnrc6a	3.7131	0.378108	0.00505257		Ier3ip1	-4.94481	-0.585067	2.14474e-05		H2-K1	-4.21111	-0.194075	0.000664766		Sipa1	7.06486	0.891541	8.13673e-11		Bcl7c	4.38952	0.708191	0.000302694		Lamp1	-3.37483	-0.478882	0.0182747		Uqcrb	6.61735	0.741308	2.3016e-09
Atp8b4	1.50121	3.41127	0.268953		Gm13556	0.787131	2.69606	0.658914		A230087F16Rik	0.803696	2.82244	0.667051		Arhgap9	3.71138	0.340137	0.00507853		Ski	-4.93948	-0.73091	2.20537e-05		Aurkaip1	-4.21103	-0.48914	0.000660966		Slc2a3	7.06464	1.29674	8.77048e-11		Ngfrap1	4.38772	0.64574	0.000304145		Adrbk1	3.37462	0.363966	0.0182747		Uba1	6.6121	1.11619	2.49507e-09
Adgra2	1.50121	3.41127	0.268953		Nodal	0.787131	2.69606	0.658914		Gm17077	0.803696	2.82244	0.667051		Mlec	3.71102	0.472513	0.00507865		Rsl1d1	-4.9389	-0.771706	2.25258e-05		Prdx3	-4.20658	-0.745596	0.000674685		Supt4a	7.06228	0.597439	8.15383e-11		Sin3b	4.38395	0.497349	0.000307247		Tapbp	3.37364	0.33608	0.0183129		2610001J05Rik	6.60313	1.45995	2.84208e-09
Insl5	1.50121	3.41127	0.268953		Gm37622	0.787131	2.69606	0.658914		2310026I22Rik	0.803696	2.82244	0.667051		Hipk1	3.7052	0.509761	0.00520016		Prdx6	-4.93612	-0.556695	2.23424e-05		Thoc7	-4.20589	-0.600749	0.000674685		Fip1l1	7.06165	0.873426	8.22961e-11		Pdcd5	4.38341	0.503696	0.000308027		Itgal	3.37045	0.411874	0.0184964		Tes	6.60299	0.947629	2.55773e-09
Rapgef4	1.49946	0.482351	0.269596		Igsf10	0.787131	2.69606	0.658914		Foxc1	0.803696	2.82244	0.667051		Clec2i	3.70443	0.475013	0.00520273		Tceb1	-4.93611	-0.597381	2.23424e-05		Rbm39	-4.20459	-0.252753	0.000674685		Cox6c	7.06041	0.552458	7.96874e-11		Plekhg2	4.38083	0.776674	0.000311171		Larp1	-3.37018	-0.608255	0.018537		Clk1	6.59975	0.836185	2.58694e-09
Txndc15	1.49619	0.156354	0.271063		Stkld1	0.787131	2.69606	0.658914		Arntl2	0.803696	2.82244	0.667051		St6gal1	3.70147	0.54823	0.00525349		Mrpl24	-4.93487	-0.639574	2.23424e-05		Rap1a	-4.19951	-0.396638	0.000691972		Igtp	7.05462	0.869791	8.60919e-11		Morf4l1	4.37917	0.37501	0.000313442		Cd48	3.36997	0.33771	0.0184989		Cnppd1	6.59665	1.29066	2.84983e-09
Gm42595	1.49474	0.764905	0.271744		Abcg5	0.787131	2.69606	0.658914		Gm10409	0.803696	2.82244	0.667051		Mbnl2	3.69959	0.578602	0.00528404		Samm50	-4.9342	-0.80246	2.25258e-05		Apex1	-4.19887	-1.46979	0.000706404		Elf1	7.0544	0.802098	8.60919e-11		Nol10	4.37891	1.0604	0.000315132		Bmp2k	3.36888	0.795195	0.0185612		Rab35	6.58016	1.30141	3.20662e-09
Sec24a	1.49429	0.159422	0.271891		1700027A07Rik	0.787131	2.69606	0.658914		RP24-416M6.5	0.803696	2.82244	0.667051		Stag2	3.69806	0.432246	0.00530335		Tuba1b	-4.93198	-0.947608	2.42376e-05		Tank	-4.19501	-0.625703	0.000706404		Psme1	7.0541	0.566713	8.35915e-11		Snrpe	4.37029	0.384131	0.000324025		Crbn	3.36789	0.490939	0.0185612		Nfatc3	6.57691	1.16079	3.00122e-09
Gm4707	1.48898	0.320607	0.274133		D830039M14Rik	0.787131	2.69606	0.658914		Aspn	0.803696	2.82244	0.667051		Plekha1	3.69684	0.631971	0.00532886		Ahsa1	-4.9264	-0.579774	2.33388e-05		Vdac2	-4.19354	-0.455061	0.000706404		Capzb	7.05263	0.643284	8.35915e-11		Srsf7	4.36705	0.537203	0.000328357		Trim12a	-3.36453	-0.468522	0.0187849		Rbl2	6.57529	1.35955	3.16923e-09
Gm9774	1.4883	0.420313	0.274398		Spic	0.787131	2.69606	0.658914		Olfr658	0.803696	2.82244	0.667051		Phf21a	3.69382	0.561783	0.00538017		Rbbp6	-4.92429	-0.626623	2.37051e-05		Gm9843	-4.19275	-0.575769	0.000706404		Stat4	7.05031	0.976239	8.78047e-11		Rab11b	4.3604	0.519026	0.000338577		Surf4	3.36333	0.564964	0.018825		Baz2a	6.57253	1.14976	3.16923e-09
Pgm2l1	1.48786	0.307731	0.274496		Gm15319	0.787131	2.69606	0.658914		Parvb	0.803696	2.82244	0.667051		BC005537	3.69229	0.43547	0.00540112		Rtp4	-4.91927	-1.34653	2.4856e-05		Orai1	-4.19209	-0.784988	0.000713567		Arhgef6	7.04884	0.987768	8.9578e-11		Usp3	-4.35654	-0.707739	0.000344949		Tonsl	3.36105	0.329259	0.0189395		Itgb2	6.56932	0.885006	3.21959e-09
Rassf2	1.48654	0.126959	0.275059		Gm16553	0.787131	2.69606	0.658914		Gm11831	0.803696	2.82244	0.667051		Mknk2	3.69118	0.3936	0.00541536		Edf1	-4.91681	-0.434008	2.44445e-05		Bphl	-4.18556	-1.36666	0.00073381		Mprip	7.04759	1.19451	9.3817e-11		Ccr8	4.35378	2.9715	0.00036729		Gbp4	3.36037	0.517023	0.0189776		Mbnl1	6.56656	0.564633	3.00122e-09
Map3k14	1.48595	0.211097	0.275248		Tas1r1	0.787131	2.69606	0.658914		Tbx1	0.803696	2.82244	0.667051		Tmem108	3.68462	1.63876	0.00560528		Eif6	-4.91456	-0.678514	2.47272e-05		Naa10	-4.1844	-0.674908	0.000733795		Atp5h	7.04709	0.471954	8.60919e-11		Med29	4.35351	0.803556	0.000349164		Pstpip1	3.35941	0.473706	0.0190233		Klf13	6.56555	0.767943	3.16923e-09
Mef2a	1.48569	0.191668	0.275341		Ppm1j	0.786554	0.163712	0.658914		Slc16a7	0.803696	2.82244	0.667051		Trrap	3.68459	0.609315	0.00555542		U2af1	-4.9145	-0.648951	2.47305e-05		Gtf2i	-4.1728	-0.752617	0.000764985		Ndufa7	7.03457	0.576381	9.35643e-11		Mrps18a	4.35323	0.712552	0.000349164		Sidt1	-3.35926	-1.08476	0.0191311		Cd7	6.55177	2.29273	4.8975e-09
Lta4h	1.48559	0.126711	0.275357		Adam19	0.784246	0.106873	0.659563		Ltk	0.803696	2.82244	0.667051		Herc4	3.6816	0.602024	0.00560528		Phf11c	-4.90575	-1.63281	2.6435e-05		Lag3	-4.17085	-2.37847	0.000809912		Pcm1	7.03438	1.02987	1.02406e-10		Rab3ip	-4.35271	-1.1186	0.000353506		Lef1	-3.35146	-0.500953	0.0195354		Bin1	6.55123	1.04931	3.62905e-09
Gm10401	1.48418	3.82631	0.276067		Smim1	0.782923	0.848064	0.66045		Wnt16	0.803696	2.82244	0.667051		Dnah8	3.67891	0.974724	0.00565141		Oaz1	-4.9028	-0.326581	2.62546e-05		Nt5c	-4.16685	-0.421343	0.000784264		Papola	7.02953	0.818791	1.01047e-10		Atp5l	4.34858	0.34538	0.000353944		Cib1	3.34857	0.549048	0.0196737		Crmp1	6.54851	2.56694	5.07025e-09
Stxbp6	1.48418	3.82631	0.276067		Mansc1	0.782137	0.297511	0.660833		Gm11127	0.803696	2.82244	0.667051		Foxk1	3.67828	0.809506	0.00565141		Fubp1	-4.90226	-0.501866	2.61006e-05		Nfat5	-4.16563	-0.749218	0.000788476		Chd4	7.0265	0.81845	1.03615e-10		Evi2a	4.34489	1.51317	0.000369681		Rcbtb2	3.34774	0.740783	0.0197203		E2f2	6.54775	2.34023	4.8975e-09
Tubb3	1.48418	3.82631	0.276067		5830405F06Rik	0.778912	1.47367	0.663029		Anpep	0.803696	2.82244	0.667051		Zfp644	3.67814	0.359946	0.00565141		Rgs19	-4.901	-0.811514	2.61912e-05		Lsm12	-4.16551	-0.625265	0.000788476		Laptm4a	7.02207	0.8243	1.05665e-10		Romo1	4.34059	0.551176	0.00036729		Matn2	3.34728	1.4783	0.0198286		Lpar6	6.54405	1.69837	4.26443e-09
Gpsm2	1.48155	0.826306	0.277243		Pcdhga5	0.778912	1.47367	0.663029		4930512B01Rik	0.803696	2.82244	0.667051		Laptm5	3.67744	0.225348	0.00565141		6330403K07Rik	4.89901	1.25873	2.6435e-05		Nme1	-4.16549	-0.57582	0.00080449		Dnajb6	7.02046	0.779728	1.05665e-10		Serf2	4.33834	0.297665	0.000369027		Peo1	-3.34669	-2.08921	0.0200435		Sash3	6.54399	0.910197	3.69014e-09
Cenpn	1.48058	1.00318	0.277697		Gm4841	0.776715	0.209362	0.664723		Fhod3	0.803696	2.82244	0.667051		Ppp1r18	3.67691	0.295389	0.00565537		Mrps26	-4.89877	-0.773872	2.6301e-05		H2afv	-4.16496	-0.45464	0.000791718		Rgs1	7.01951	0.950166	1.06805e-10		Mea1	4.33685	0.707169	0.000372454		Izumo1r	3.34493	0.293548	0.0198286		Cd44	6.54006	1.33959	3.95784e-09
Rnmtl1	1.48038	0.327073	0.277752		Neu1	0.774015	0.099293	0.666541		Gm20716	0.803696	2.82244	0.667051		Esd	3.67535	0.335148	0.00568222		Ier2	-4.89716	-0.832861	2.67685e-05		Snrnp27	-4.16414	-0.710901	0.000790487		Syf2	7.01865	0.620058	1.05665e-10		Nrip1	4.33643	0.589611	0.000372454		Mapkapk3	3.33447	0.683829	0.0205839		Mat2b	6.53914	0.853515	3.78686e-09
Phkg1	1.4801	0.866948	0.277884		Gm8817	0.772365	0.580583	0.667651		Adhfe1	0.803696	2.82244	0.667051		Fam63b	3.67388	0.510271	0.00571213		Clic1	-4.88647	-0.360277	2.80113e-05		Pdcd5	-4.16196	-0.517202	0.000796459		Cd44	7.01773	1.10178	1.06805e-10		Rhog	4.33464	0.574054	0.000373756		Pou2f2	-3.334	-0.435895	0.0205839		Gm8730	6.53793	1.02765	4.0156e-09
Pde3b	1.47411	1.13443	0.280392		D030055H07Rik	0.769796	1.1111	0.669344		Tmem59l	0.803696	2.82244	0.667051		Zfp950	3.67208	0.552914	0.00575653		Cbl	-4.88277	-0.634349	2.84062e-05		Alkbh6	-4.16172	-1.0083	0.000798947		Nap1l4	7.01354	0.791019	1.09084e-10		Ergic3	4.3306	0.580812	0.000379805		Mettl7a1	3.32984	1.52935	0.0209413		Nono	6.53582	0.793161	3.63811e-09
Il18bp	1.47268	0.622772	0.281018		Gpc2	0.769796	1.1111	0.669344		Prr5	0.803696	2.82244	0.667051		Ncf1	3.66903	1.75877	0.00589903		Rwdd1	-4.88252	-0.57877	2.84062e-05		Isg15	-4.16063	-1.41497	0.000831092		Rab14	7.0128	0.693626	1.0957e-10		Pnrc1	4.32899	0.340643	0.000380717		Prdx5	3.32683	0.339496	0.0209887		Ndufb8	6.53447	0.891772	3.93472e-09
Bzw2	1.47142	0.113357	0.281621		Ttc41	0.769796	1.1111	0.669344		4833428L15Rik	0.803696	2.82244	0.667051		2310001H17Rik	3.6621	0.48521	0.00595089		Grb2	-4.87321	-0.542915	2.9687e-05		Srm	-4.15747	-1.59199	0.000831002		Pdlim2	7.00481	0.904917	1.17302e-10		Ncl	4.3289	0.514555	0.000380435		Abcb1a	3.31953	0.685201	0.0215323		Htatip2	6.53299	1.54077	4.27494e-09
Nrm	1.46922	0.292662	0.282589		Fgd4	0.769796	1.1111	0.669344		Edn1	0.803696	2.82244	0.667051		BC021614	3.66157	0.519719	0.00595954		Srebf2	-4.87147	-1.1197	3.02407e-05		Dkc1	-4.15659	-0.830898	0.000818089		Tmbim4	7.00269	0.834063	1.17148e-10		Alkbh1	4.328	0.657099	0.000382565		Stx6	3.31325	0.493115	0.0219708		Nudt21	6.53059	1.0634	4.08267e-09
Zfp358	1.46636	0.476363	0.283969		Klhl17	0.768941	0.245399	0.669712		Cyp11a1	0.803696	2.82244	0.667051		mt-Atp8	3.65836	0.42301	0.00601793		Rbx1	-4.87037	-0.411092	3.00373e-05		Chmp4b	-4.15646	-0.41773	0.000809912		Capza2	6.99691	0.691839	1.20005e-10		Tmem160	4.32527	0.539896	0.000387248		Anxa6	3.31163	0.399376	0.0220524		Psma4	6.53033	0.858125	3.81955e-09
Mllt11	1.46455	0.282944	0.28484		Gbp6	0.767897	0.174292	0.670086		Gm16267	0.803696	2.82244	0.667051		Uqcc3	3.65799	0.387596	0.00601882		Uqcrb	-4.86759	-0.443147	3.05865e-05		Crip1	4.15531	0.605535	0.000810802		Ptpn22	6.99629	0.787079	1.20009e-10		Hnrnpc	4.3224	0.446354	0.000390393		Runx2	3.31131	1.07649	0.0221563		Snx5	6.52792	1.19929	4.08632e-09
Rrs1	1.46074	0.196255	0.286742		Nlrp1a	0.767336	1.1111	0.670506		Ckm	0.803696	2.82244	0.667051		Chd8	3.65771	0.452915	0.00601882		Pou2f2	-4.86113	-0.60345	3.12147e-05		Asap1	-4.15496	-0.707045	0.00081412		Hnrnpl	6.99429	0.827731	1.22999e-10		Magoh	4.31903	0.491938	0.000395475		Sla	3.3076	0.456957	0.0223028		Mrps23	6.52506	1.09439	4.11592e-09
Pja1	1.45976	0.168897	0.287064		Eid2	0.765873	0.146431	0.67153		Gm14434	0.803696	2.82244	0.667051		Tubb5	3.65723	0.322881	0.00601882		Hnrnpd	-4.86013	-0.604862	3.17004e-05		Sptssa	-4.15208	-0.499523	0.00082142		Eif3c	6.99122	0.69607	1.20983e-10		Zbtb8os	4.31374	0.632815	0.000405451		Cct5	-3.30541	-0.370939	0.0225241		1700020I14Rik	6.51899	1.11499	4.26443e-09
Tmem79	1.45947	1.00318	0.2872		Jchain	0.765794	0.741864	0.671539		Ccdc170	0.803696	2.82244	0.667051		Gimap3	3.64597	0.218106	0.00628057		Pomp	-4.85921	-0.508355	3.16449e-05		Nhp2l1	-4.152	-0.502391	0.000823345		Tecpr1	6.98465	0.816456	1.3406e-10		Yipf3	4.3117	0.559342	0.000406882		Ctsd	3.30511	0.372786	0.0224634		Ndufb3	6.51897	0.838607	4.23007e-09
Tatdn2	1.45895	0.204956	0.287344		9530082P21Rik	0.765323	0.453204	0.671841		Trpc7	0.803696	2.82244	0.667051		Nfkbiz	3.63992	0.643129	0.00644483		2700094K13Rik	-4.85573	-0.873922	3.27772e-05		Arf3	-4.14979	-0.731111	0.000829404		Snx20	6.97984	0.888757	1.354e-10		Tgfbr1	4.30841	0.82692	0.000420515		Lockd	3.30508	0.886152	0.0224634		Prex1	6.51204	1.39437	5.12041e-09
Cast	1.45802	0.131033	0.287575		Zkscan7	0.765323	0.453204	0.671841		Gm15569	0.803696	2.82244	0.667051		Gzf1	3.63851	1.15582	0.00647712		Nabp1	-4.85176	-1.07656	3.28166e-05		Uck2	-4.14929	-1.44683	0.000836302		Arf4	6.97646	0.791631	1.38932e-10		Szrd1	4.30577	0.807368	0.000420515		Hsd11b1	3.30469	0.561027	0.0224634		Ift20	6.50168	1.03866	4.77089e-09
Cd2ap	1.44855	0.158361	0.291797		Fam26f	0.760737	0.113285	0.675274		Trdv5	0.803696	2.82244	0.667051		Mrps9	3.63712	0.504505	0.00647712		Chchd1	-4.85134	-0.660175	3.27692e-05		Mogs	-4.14899	-0.84245	0.000831092		Ssb	6.97627	0.631542	1.33391e-10		Bcl2l1	4.30468	1.38548	0.000429514		Cdk4	-3.30287	-0.552064	0.0226293		Surf1	6.50083	1.33115	5.28548e-09
Rmnd1	1.44499	0.230927	0.29348		Vmac	0.759965	0.264508	0.675779		Tspan10	0.803696	2.82244	0.667051		Srrm2	3.63492	0.244244	0.00652065		Cd81	4.84402	0.714129	3.34876e-05		Lrmp	-4.14687	-0.774314	0.000834853		Srsf11	6.97626	0.703595	1.39777e-10		Pdlim1	-4.30269	-0.950825	0.000423751		Gtpbp4	-3.3017	-0.596482	0.0226846		Rtn4	6.495	1.09725	5.34621e-09
Gm12278	1.44421	1.14823	0.293802		Cyb5d2	0.759701	0.253838	0.67584		Trav6n-5	0.803696	2.82244	0.667051		B3galt4	3.62905	0.77199	0.00665562		Rac1	-4.84251	-0.461224	3.37755e-05		Ssr2	-4.13873	-0.624686	0.000862893		Cdk12	6.97194	0.984476	1.50014e-10		Hnrnpu	4.30152	0.466316	0.000423751		Tagap	-3.29988	-1.10436	0.0227556		Kcnab2	6.49353	1.65869	5.76038e-09
Mycbp	1.44386	0.299558	0.293929		Hist1h3f	0.759022	0.608598	0.676256		Rs1	0.803696	2.82244	0.667051		Eno1	3.62438	0.313152	0.00675926		Psmd4	-4.84045	-0.506061	3.41044e-05		Rgs3	-4.13602	-0.888425	0.000870534		Psip1	6.96256	0.845156	1.52661e-10		Rap1b	4.30007	0.41882	0.000427681		Vps54	3.29898	0.521729	0.0227556		Osbpl3	6.48734	1.7556	6.06209e-09
AK157302	1.43531	1.24134	0.297802		Zfp174	0.759022	0.608598	0.676256		Fcnaos	0.803696	2.82244	0.667051		Katna1	3.6235	0.571161	0.00678095		Gm26740	-4.83924	-0.510494	3.41044e-05		Nop10	-4.13461	-0.428238	0.000875123		N4bp2l2	6.96176	0.794175	1.5208e-10		Gch1	4.29373	1.50525	0.000448227		Ube2b	3.29841	0.301267	0.0227556		Fam129a	6.48344	1.39962	5.72469e-09
Gm16028	1.43397	2.24134	0.298408		Tbc1d16	0.758052	0.310407	0.677063		Gm15624	0.803696	2.82244	0.667051		Itgal	3.62275	0.398708	0.00680218		Rsrp1	-4.83223	-0.366683	3.53566e-05		Timm13	-4.13306	-0.445788	0.000878753		Mxd4	6.96139	0.802866	1.51189e-10		Psma1	4.29265	0.51775	0.000441174		Smad7	-3.29734	-0.470523	0.0228326		Vps36	6.48041	1.20045	5.30573e-09
Pdha1	1.42946	0.106559	0.30057		Cmya5	0.754979	0.515488	0.678644		Gm10062	0.803696	2.82244	0.667051		Parp11	3.61272	0.688016	0.00705675		Irgm1	-4.83025	-0.870216	3.61762e-05		Eif3c	-4.13294	-0.460992	0.000879622		Tmed9	6.96121	0.632388	1.46638e-10		Timm8b	4.29264	0.633622	0.000439174		Vars	-3.29731	-0.638401	0.0228546		Fam32a	6.46653	0.917889	5.76038e-09
Tbxa2r	1.42812	0.14902	0.301291		Fam120aos	0.754471	0.429274	0.67897		RP24-64C6.3	0.803696	2.82244	0.667051		Arid5b	3.61061	0.500879	0.00708697		Eif4g2	-4.8285	-0.475744	3.61762e-05		Atp6v1g1	-4.13202	-0.450659	0.000878445		Cltc	6.9585	0.99329	1.55273e-10		Kansl1l	4.28942	1.0963	0.000448227		Trmt1	-3.28951	-0.837741	0.0234693		Camk4	6.46241	1.1606	6.02573e-09
Mctp2	1.42776	0.755917	0.301465		Tcta	0.752512	0.286184	0.680486		Nudt12	0.803696	2.82244	0.667051		Cnot6	3.61015	0.521439	0.00709471		Lcp1	-4.82749	-0.411706	3.66674e-05		Snrpa	-4.12719	-0.88466	0.000901669		Sh3glb1	6.95418	0.679808	1.58664e-10		Hnrnpa1	4.28851	0.557678	0.000448227		Tpt1	-3.28927	-0.166351	0.0234693		Hectd1	6.46226	0.990936	5.81254e-09
Nme2	1.42584	0.223052	0.302137		Mst1	0.75055	0.651666	0.682037		Sox30	0.803696	2.82244	0.667051		Tagln2	-3.60918	-0.499145	0.00712922		Bzw1	-4.82652	-0.554132	3.63417e-05		Txndc9	-4.12565	-0.63474	0.000901669		Socs1	6.9519	1.04206	1.72563e-10		Tpm4	4.28514	0.537018	0.000450639		AB124611	-3.28765	-0.979495	0.0235832		Plekho2	6.46127	1.89582	6.66446e-09
B3galnt2	1.42383	0.230455	0.303094		Atp8a2	0.74927	0.489609	0.682793		Gm15853	0.803696	2.82244	0.667051		Rexo4	3.60838	0.570714	0.00712922		Ndufa13	-4.82481	-0.349041	3.69137e-05		Gatad2b	-4.12432	-0.591337	0.000903525		Pear1	6.94511	1.21896	1.80074e-10		Ldhb	4.28287	0.626019	0.000455839		Yipf3	3.28537	0.477644	0.0236371		Ndufs2	6.46094	0.917236	5.78097e-09
Tcf20	1.42355	0.164566	0.303215		Casd1	0.749227	0.142402	0.682793		Avil	0.803696	2.82244	0.667051		Tln1	3.60693	0.307601	0.00714965		Psme2b	-4.82393	-1.04253	3.68441e-05		Fnta	-4.12352	-0.724469	0.000906132		1700020I14Rik	6.9386	0.929531	1.75744e-10		Cct8	4.28038	0.44514	0.00045965		Ube2h	3.27981	0.43693	0.0240627		Ndufs8	6.45987	1.07944	6.02573e-09
Tec	1.42072	0.353672	0.304352		Brf2	0.746796	0.286184	0.684391		Gm37073	0.803696	2.82244	0.667051		Phf14	3.60656	0.418766	0.00715308		Tcf12	-4.8192	-0.785221	3.73608e-05		Ndufb11	-4.114	-0.360859	0.000943624		Gramd1b	6.93732	1.20845	1.85258e-10		Rbx1	4.27748	0.359544	0.000464223		Pydc3	-3.27771	-0.959488	0.0243927		Dcaf12	6.4587	1.47194	6.44412e-09
Bfsp2	1.41955	1.82631	0.304886		Gm16124	0.745916	0.206346	0.684837		Cadm4	0.803696	2.82244	0.667051		Bend5	3.59956	2.31336	0.00743729		Zmynd8	-4.81611	-0.728637	3.82292e-05		Rrp15	-4.11359	-1.2548	0.000953625		BC005537	6.93611	0.946233	1.86445e-10		Uqcr11	4.27502	0.422862	0.00046888		Rrp15	-3.27406	-1.08304	0.0245949		Idh3g	6.45672	1.1747	6.40053e-09
Usp28	1.4175	0.315821	0.305772		Gm4724	0.744029	1.1111	0.685355		Ppfia4	0.803696	2.82244	0.667051		Utf1	-3.59876	-4.46142	0.00753222		Imp3	-4.81404	-0.57378	3.818e-05		Dpp4	-4.11213	-0.878341	0.00095226		Ube3a	6.93578	0.85888	1.81096e-10		Bcap31	4.27265	0.486089	0.000473461		Dynlt3	3.27199	0.659024	0.02464		Rfk	6.45566	1.90418	7.99946e-09
Gm12359	1.41586	1.63366	0.30647		Gm19705	0.742906	0.239105	0.685355		Gm11365	0.803696	2.82244	0.667051		Mllt6	3.59608	0.482627	0.00743501		Tbc1d1	-4.81214	-0.810034	3.85704e-05		Mgmt	-4.11207	-1.92756	0.000984626		Ppp1cc	6.93186	0.729327	1.8662e-10		Rasa3	-4.26981	-1.11131	0.000487576		Htatip2	3.2707	0.688803	0.0247313		Dgkz	6.45279	0.899117	5.81162e-09
Gm43385	1.41467	20.304	0.30647		Gm37850	0.742224	0.888706	0.685355		Gm26874	0.803696	2.82244	0.667051		Stt3b	3.5958	0.669205	0.00743729		Sidt1	-4.81167	-1.56478	3.96455e-05		Fam114a2	-4.1032	-0.768225	0.000982975		Ctss	6.9316	0.632624	1.82077e-10		Psmd11	4.2673	0.519487	0.000483474		Fam3c	3.26056	0.378934	0.0255474		Cggbp1	6.44855	1.08709	6.37896e-09
Gm13919	1.41467	20.304	0.30647		Il20rb	0.742224	0.888706	0.685355		Ugt1a6a	0.803696	2.82244	0.667051		Cnot6l	3.59405	0.375996	0.00745123		Sf3b2	-4.80757	-0.490152	3.92178e-05		Ube2b	-4.103	-0.382041	0.000982975		Cflar	6.92535	0.888437	1.98715e-10		Sh3bgrl	4.26501	0.618774	0.000487576		Lsm11	-3.25286	-1.58059	0.026416		Rab19	6.44827	1.53955	6.8468e-09
Gm11712	1.41467	20.304	0.30647		Plcd3	0.742224	0.888706	0.685355		Rimbp3	0.803696	2.82244	0.667051		Gsto1	3.59405	0.910351	0.00745123		Ctnnbl1	-4.80722	-0.965941	3.97663e-05		Creg1	-4.09898	-0.924951	0.000998884		Prr13	6.92501	0.772444	1.8662e-10		1810022K09Rik	4.26405	0.470084	0.000487576		Pa2g4	-3.25195	-0.62131	0.0265219		Uqcrq	6.44714	0.83957	6.25656e-09
Teddm3	1.41467	20.304	0.30647		Agrp	0.73897	0.69606	0.687393		Itgad	0.803696	2.82244	0.667051		Tmem168	3.5925	0.644085	0.00749485		Wdr83os	-4.80526	-0.601817	4.03204e-05		mt-Nd4l	-4.09857	-0.533075	0.000996755		Gbp8	6.92413	0.999307	1.90019e-10		Arhgef18	-4.26289	-0.949942	0.000495166		Nckap1l	3.25058	0.569033	0.026416		Bcap31	6.44546	0.912926	6.3813e-09
Doc2a	1.41467	20.304	0.30647		Retsat	0.738845	0.526135	0.687393		Arhgef25	0.803696	2.82244	0.667051		Taf15	3.58149	0.397279	0.00777735		Fsd1l	-4.80204	-25.9175	4.52563e-05		Ndufs7	-4.0939	-0.452601	0.00101535		Phf1	6.92381	0.974086	1.96354e-10		Reps1	4.26247	0.661125	0.000491662		Zdhhc18	3.2482	0.405102	0.0265219		Pbxip1	6.44176	1.06939	6.51625e-09
Ankrd22	1.41467	20.304	0.30647		2210010C04Rik	0.738235	1.37413	0.687393		Parva	0.803696	2.82244	0.667051		Cep57l1	3.58148	0.893403	0.00780527		Pitpnc1	-4.79791	-0.830416	4.14469e-05		Isg20	-4.0842	-0.886663	0.00106608		Sdha	6.91425	0.692152	1.97845e-10		Elp5	4.24982	1.00003	0.00052064		Klrb1f	3.2453	2.4586	0.0272092		Il2rg	6.43895	0.730378	6.33394e-09
Gm16701	1.41467	20.304	0.30647		Prlr	0.738235	1.37413	0.687393		Myom1	0.803696	2.82244	0.667051		Gbp2	3.57847	0.65986	0.00786234		Csk	-4.79715	-0.490032	4.10398e-05		Pnkd	-4.08238	-0.750819	0.00106608		Srsf1	6.91216	0.863849	2.08252e-10		Hnrnpab	4.24978	0.541581	0.00051823		Tuba4a	-3.23841	-0.56403	0.0274383		Ndufs5	6.43812	0.835247	6.44291e-09
Myadml2os	1.41467	20.304	0.30647		Ube4bos1	0.738235	1.37413	0.687393		Gm7580	0.803696	2.82244	0.667051		Dock8	3.57831	0.402126	0.00785584		Btg2	-4.79311	-0.507167	4.16834e-05		Ubc	-4.08069	-0.300964	0.00106608		Ddx3y	6.90975	0.949328	2.15488e-10		Isyna1	4.24764	0.797815	0.000524325		Srsf2	-3.23755	-0.393531	0.027551		Nol7	6.43748	0.800882	6.69179e-09
Ccdc152	1.41467	20.304	0.30647		Srl	0.738235	1.37413	0.687393		Abcc9	0.803696	2.82244	0.667051		Clk1	3.57602	0.3311	0.00789784		Tpm4	-4.79243	-0.681216	4.22942e-05		Csk	-4.08002	-0.412688	0.00106739		Sh2b1	6.90915	1.33792	2.36231e-10		Rhoa	4.24508	0.313633	0.000526365		Os9	3.23565	0.457294	0.027551		Cuta	6.43066	1.05833	7.04629e-09
Cyp2c55	1.41467	20.304	0.30647		4930500M09Rik	0.738235	1.37413	0.687393		Klhdc9	0.803696	2.82244	0.667051		Gabpb2	3.57559	0.486396	0.00789784		Igbp1	-4.79041	-0.725566	4.24182e-05		Tmbim6	-4.07926	-0.348471	0.00107052		Fam189b	6.90647	0.714256	2.14232e-10		Mrps12	4.24338	0.60171	0.000530417		Naga	3.2347	0.971773	0.0278506		Itga4	6.43019	1.12545	8.1592e-09
Foxc2	1.41467	20.304	0.30647		Rbm47	0.738235	1.37413	0.687393		Cdk14	0.803696	2.82244	0.667051		Snhg12	3.5755	0.49661	0.00789784		H3f3a	-4.78669	-0.30184	4.31616e-05		St8sia1	-4.07832	-1.88345	0.00109461		Grina	6.90526	1.1301	2.1961e-10		Mat2a	4.24022	0.566082	0.000538983		Trim28	-3.23098	-0.665908	0.0280139		Gm8369	6.42866	0.948637	7.60417e-09
1700010K24Rik	1.41467	20.304	0.30647		Ermap	0.738235	1.37413	0.687393		Gm43603	0.803696	2.82244	0.667051		4930453N24Rik	3.56643	0.44707	0.00815789		Cdv3	-4.78192	-0.937959	4.46291e-05		Cycs	-4.07789	-0.548082	0.00108751		Ncoa2	6.90333	1.01789	2.25772e-10		Gar1	4.23873	0.830165	0.00054066		Fam134b	3.22895	0.406826	0.0280806		Tcp11l2	6.42471	1.16818	7.41759e-09
Wnt8b	1.41467	20.304	0.30647		Gm15541	0.738235	1.37413	0.687393		Gm16175	0.803696	2.82244	0.667051		Tbrg1	3.56597	0.315186	0.00815789		Ddx21	-4.78095	-0.814226	4.54428e-05		Cdc37	-4.07694	-0.451407	0.00108044		Cep250	6.90065	1.2624	2.28662e-10		Set	4.23539	0.437382	0.000545322		Arhgap25	3.22833	0.508566	0.0280967		Hadhb	6.42109	0.985308	7.40227e-09
Muc3	1.41467	20.304	0.30647		Gm10097	0.738235	1.37413	0.687393		Zfp532	0.803696	2.82244	0.667051		Bphl	3.56532	0.731994	0.00818226		Man1a	-4.77722	-0.806516	4.48433e-05		Bcl2a1d	-4.07579	-2.09846	0.00111698		Eci1	6.9003	1.00304	2.24012e-10		Slc25a3	4.23538	0.396752	0.000547648		Bin1	3.22802	0.430494	0.0280967		Uba2	6.41348	1.02932	7.63695e-09
Trim66	1.41467	20.304	0.30647		Phxr2	0.738235	1.37413	0.687393		Asprv1	0.803696	2.82244	0.667051		Trim24	3.56508	0.71876	0.00819303		Rpp21	-4.77574	-0.653418	4.52563e-05		Ralbp1	-4.07325	-0.511412	0.00109116		Hprt	6.9001	0.782493	2.1961e-10		Ddx5	4.2339	0.254203	0.000547648		Igf2r	-3.22768	-0.643647	0.0282543		Mrpl43	6.4123	0.970623	7.63695e-09
Arl9	1.41467	20.304	0.30647		Fzd7	0.738235	1.37413	0.687393		Mesp2	0.803696	2.82244	0.667051		Arhgef12	3.56121	0.720953	0.00827941		Ndufs4	-4.77502	-0.56569	4.53348e-05		Psmb7	-4.07321	-0.635034	0.00109501		Ndufb7	6.90003	0.611908	2.18119e-10		Krtcap2	4.2256	0.390995	0.000569568		Serinc5	3.22619	1.27336	0.0283951		Med10	6.41138	1.08039	7.76367e-09
Lin7b	1.41467	20.304	0.30647		Calr3	0.738235	1.37413	0.687393		Psd2	0.803696	2.82244	0.667051		Tank	3.5611	0.435763	0.00827941		Il21r	-4.77386	-0.572928	4.56895e-05		Izumo4	-4.07221	-0.744732	0.00109668		Ephx1	6.89929	0.986873	2.25256e-10		Elk3	4.22496	0.788432	0.000571921		Chil5	-3.22027	-25.0698	0.0295897		2010107E04Rik	6.40302	0.726851	7.69688e-09
Gm16897	1.41467	20.304	0.30647		4732490B19Rik	0.738235	1.37413	0.687393		Ovol1	0.803696	2.82244	0.667051		Zfp217	3.55991	0.76011	0.00831205		Pgls	-4.76698	-0.601402	4.68443e-05		Rexo2	-4.07188	-0.539845	0.00109841		Arpc5	6.89883	0.649304	2.18217e-10		Phf5a	4.22379	0.567961	0.000571921		Atp6v0a1	3.21809	1.653	0.0291672		Man2b1	6.39884	1.33818	8.87743e-09
Tsga10ip	1.41467	20.304	0.30647		Gm37933	0.738235	1.37413	0.687393		Ern2	0.803696	2.82244	0.667051		Arhgef18	3.55901	0.566583	0.00832724		Ecel1	4.75933	3.03036	5.15607e-05		Arid5b	-4.07001	-0.83379	0.00110077		Tram1	6.89698	0.849308	2.2767e-10		Prmt6	4.22052	1.25945	0.000585392		Gm9493	-3.21707	-0.537149	0.0290901		Ppp2r5a	6.39775	1.01532	8.46555e-09
Sycp2l	1.41467	20.304	0.30647		Fxyd1	0.738235	1.37413	0.687393		Gm42560	0.803696	2.82244	0.667051		Kdm5d	3.55845	0.638583	0.00833606		Sun2	-4.74871	-0.698937	5.12328e-05		Sdha	-4.06954	-0.473046	0.0011011		Zfp91	6.89518	0.95977	2.34545e-10		Tjp2	4.21645	1.9154	0.00060161		Tmem258	3.21672	0.301194	0.0290866		Yipf4	6.38974	1.10281	9.28388e-09
Mn1	1.41467	20.304	0.30647		Gm20379	0.738235	1.37413	0.687393		Loxl3	0.803696	2.82244	0.667051		Smim4	3.55672	0.620497	0.00836521		Tnfrsf25	-4.74643	-0.948903	5.19145e-05		Rangrf	-4.06835	-0.903669	0.0011129		Ms4a6b	6.89341	0.486907	2.26794e-10		Arl5c	-4.21427	-0.692286	0.000595824		Akap13	3.21558	0.283511	0.029125		Rock1	6.387	0.787383	8.43794e-09
Gm20594	1.41467	20.304	0.30647		Gm42495	0.738235	1.37413	0.687393		Crlf1	0.803696	2.82244	0.667051		Gm26771	3.55495	1.09097	0.00842021		H13	-4.74532	-0.663811	5.19145e-05		Hdgfrp3	-4.06592	-1.09834	0.00112031		Tnik	6.89303	0.891951	2.31009e-10		Sugt1	4.21301	0.522921	0.000597032		Mical3	-3.21552	-1.15727	0.0292514		1110008P14Rik	6.38412	1.13369	8.87743e-09
Gm9857	1.41467	20.304	0.30647		Gm15632	0.738235	1.37413	0.687393		Gm5538	0.803696	2.82244	0.667051		Gabarap	3.55476	0.230238	0.00840526		Rnf166	-4.74341	-0.985211	5.26154e-05		Jun	-4.06582	-0.572923	0.00111622		Maf1	6.89028	0.90139	2.39649e-10		Ap2m1	4.21222	0.533103	0.000597032		Jund	3.21379	0.25243	0.0292316		Ogt	6.38298	0.692677	8.62418e-09
Serpinf2	1.41467	20.304	0.30647		Fam212a	0.738235	1.37413	0.687393		Gm42649	0.803696	2.82244	0.667051		Yeats4	3.55364	0.430854	0.00842021		Mrto4	-4.74336	-1.22895	5.4258e-05		Gtf2a2	-4.06514	-0.556997	0.00111713		Fam193a	6.88594	1.16038	2.54555e-10		Tbcb	4.21066	0.592906	0.00060161		Qsox1	3.20961	0.780027	0.0295897		Bnip3l	6.37806	0.76768	8.94698e-09
Guca2a	1.41467	20.304	0.30647		Dnah7c	0.738235	1.37413	0.687393		Peg3	0.803696	2.82244	0.667051		Dcun1d1	3.55268	0.497391	0.00845219		Eef1e1	-4.73985	-1.21712	5.39531e-05		Tbl1xr1	-4.06493	-0.816312	0.00112234		D8Ertd738e	6.88114	0.637426	2.46668e-10		Atpif1	4.21015	0.600056	0.000601788		Gpr183	3.20537	0.680819	0.0299692		Snx4	6.3774	1.47528	1.0194e-08
Islr2	1.41467	20.304	0.30647		H2-DMa	0.736837	0.0835329	0.688059		5430427N15Rik	0.803696	2.82244	0.667051		Calr	-3.55014	-0.344869	0.00852817		Ncor1	-4.73695	-0.436906	5.37841e-05		Slc5a3	-4.0628	-1.58851	0.0011431		Idnk	6.88007	0.774174	2.48076e-10		Ccrl2	4.20993	1.77549	0.000627374		Apol9a	3.20225	1.32315	0.0303912		Sptbn1	6.37609	1.00632	9.31276e-09
Rmi2	1.41295	0.332042	0.306965		Pou4f1	0.735683	0.770061	0.688621		Gprc5c	0.803696	2.82244	0.667051		Nrip1	3.54806	0.421155	0.00857954		Glud1	-4.73602	-0.824266	5.4258e-05		Pdia6	-4.06199	-0.621295	0.00113798		Cul3	6.8786	0.846185	2.52357e-10		Usp9x	4.20325	0.661802	0.000617559		Cep250	3.20028	0.647465	0.0303912		Psme2	6.37575	0.761318	8.87743e-09
Tdrkh	1.41234	0.431446	0.307261		Adgrv1	0.735683	0.770061	0.688621		Try5	0.803696	2.82244	0.667051		Hif1an	3.54433	0.749392	0.00870466		Gart	-4.73528	-1.23068	5.5102e-05		Prkcsh	-4.06161	-0.858101	0.00113663		Lman2	6.87728	0.766898	2.51347e-10		Mrpl21	4.20194	0.558668	0.000620219		Tfap4	-3.19995	-1.77942	0.0305161		Hopx	6.37205	0.921046	8.87743e-09
Pqlc1	1.41174	0.485269	0.307548		Twist2	0.735683	0.770061	0.688621		4930505N22Rik	0.803696	2.82244	0.667051		Ddx46	3.54339	0.403133	0.00870466		Ppan	-4.73383	-1.32841	5.60904e-05		Pafah1b3	-4.06113	-0.942774	0.00113798		Reps1	6.87519	1.0402	2.61648e-10		Serpina3g	4.19913	0.797006	0.000630461		Crot	3.1997	0.69739	0.0304358		Mrpl20	6.37105	0.973027	9.30557e-09
Fam189b	1.41003	0.082434	0.308404		Maml1	0.735656	0.162628	0.688621		Slc1a2	0.803696	2.82244	0.667051		Kpna4	3.54283	0.375724	0.00870516		Mrps17	-4.72945	-0.853044	5.54864e-05		Lat	-4.05905	-0.308773	0.00114197		Rest	6.87486	0.991623	2.66536e-10		Dynlrb1	4.19298	0.454784	0.000643304		Ttn	3.19863	0.823767	0.030466		Rab8b	6.36733	1.15175	1.00665e-08
Zfp937	1.40976	0.302744	0.308465		Usp2	0.735573	0.651666	0.688642		1700029J03Rik	0.803696	2.82244	0.667051		Tbc1d4	3.54264	0.620364	0.00873313		Sp140	-4.72886	-0.959203	5.56265e-05		Lsm6	-4.05748	-0.519512	0.0011437		Cited2	6.87111	1.05398	2.78128e-10		Emc6	4.19162	0.569522	0.000645208		Rnf19b	3.19717	0.672967	0.030632		Plekhb2	6.36609	1.45091	1.07097e-08
Gm9949	1.4071	1.18888	0.308996		Grk5	0.733998	0.346911	0.689808		4930532G15Rik	0.803333	0.380215	0.667155		Abcg3	3.54032	0.910008	0.00877869		Kpna4	-4.72777	-0.638996	5.56265e-05		Lims1	-4.05721	-0.747309	0.0011431		Ssbp4	6.87008	0.775868	2.64147e-10		Esd	4.1909	0.456429	0.000646269		Pydc4	-3.19386	-1.0429	0.0310792		Sgms1	6.36596	2.08311	1.24575e-08
Nup210l	1.4071	1.18888	0.308996		Fam84b	0.733862	0.349257	0.689846		Dcdc2b	0.802612	0.57451	0.667632		Pgs1	3.53834	0.396845	0.00881439		Tprgl	-4.72676	-0.532522	5.56265e-05		Epb41l4aos	-4.05688	-0.745596	0.00114439		Rnf149	6.86344	1.08259	2.83267e-10		Aamp	4.19053	0.491471	0.000646269		Cox7c	3.19145	0.237515	0.0310792		Tomm20	6.35732	0.679082	9.7398e-09
Krt19	1.40521	4.14823	0.309199		Fam69b	0.733143	0.218738	0.690316		5430427O19Rik	0.802612	0.57451	0.667632		C2cd5	3.53549	0.570449	0.00890555		Rer1	-4.72648	-0.489815	5.56265e-05		Rgs16	-4.05605	-2.32608	0.00119298		Phf23	6.86272	1.15405	2.87528e-10		Lamp2	4.18867	0.8492	0.000653343		Hic1	3.18955	1.28513	0.0313778		Snx20	6.35415	1.05635	1.07786e-08
Thra	1.40237	0.201026	0.310506		Gm1043	0.728679	0.544057	0.693558		Frmd4a	0.80224	0.670434	0.667883		Id3	3.53411	0.435711	0.00892785		Arpp19	-4.72582	-0.415016	5.60904e-05		Gsta4	-4.05307	-3.05115	0.00120661		Zcchc18	6.86226	1.39273	2.9868e-10		Timm22	4.17561	0.792714	0.000690216		Snw1	3.18884	0.362589	0.0313004		Psmc1	6.35374	1.30094	1.09781e-08
Mettl2	1.39791	0.266126	0.312787		Ttc30a1	0.728679	0.544057	0.693558		2310068J16Rik	0.798744	0.652512	0.669404		Cnot1	3.53127	0.475977	0.00902376		Tcp1	-4.71376	-0.606375	5.97576e-05		Rnaset2a	-4.05059	-0.392182	0.00116911		Pbrm1	6.86128	0.929674	2.90576e-10		Trappc4	4.16989	0.545095	0.000704914		Zdhhc2	3.18512	0.784542	0.0316605		2020-09-06	6.3533	0.877208	1.03876e-08
Adh1	1.39543	1.29579	0.314032		Gm13154	0.728113	0.328689	0.693941		Capn11	0.795711	0.722902	0.670912		Birc6	3.53086	0.367763	0.00902376		Mrpl12	-4.71214	-0.824015	6.0462e-05		Sf3b2	-4.04931	-0.397732	0.00117623		Capns1	6.86109	0.790986	2.79427e-10		Nucks1	4.16605	0.483487	0.00071352		Wdr89	-3.18441	-0.383473	0.0316668		Trabd	6.35242	1.07519	1.0516e-08
Asph	1.39432	0.933221	0.3145		Kit	0.727591	2.1111	0.694292		Slc22a2	0.793066	0.304589	0.672738		Stk26	3.5301	0.747981	0.00904632		Leprotl1	-4.70858	-0.416465	6.01941e-05		Axin2	4.04908	1.07311	0.00117757		Adora2a	6.8566	1.27018	2.9756e-10		Commd3	4.1659	0.590714	0.000716474		Derl1	3.18251	0.448489	0.0318204		Rbm38	6.35017	0.918197	1.12806e-08
Gm13842	1.39308	0.633661	0.315112		Fam71b	0.727591	2.1111	0.694292		Fam69b	0.792702	0.242493	0.673006		Usp34	3.52881	0.410609	0.00907801		Nifk	-4.70453	-1.11825	6.25875e-05		Rnaset2b	-4.0479	-0.407623	0.00117757		Zfp36l2	6.85528	0.684249	2.97635e-10		Cytip	-4.16584	-0.419479	0.000713648		Sema4d	3.1758	0.440772	0.0325309		Tnfaip8	6.34864	0.863265	1.04397e-08
Gm37065	1.38154	0.3846	0.320871		Egf	0.724251	0.888706	0.696052		Zfp692	0.789119	0.190781	0.675238		Tnfrsf4	-3.5251	-0.580711	0.00926432		Bcas2	-4.70379	-0.534264	6.17393e-05		Gm26917	-4.04684	-0.662547	0.00118775		Tiam1	6.85435	0.996647	2.88199e-10		1110004F10Rik	4.16498	0.468191	0.000716474		Trmt61a	-3.16881	-1.80228	0.033585		Psmd13	6.34661	1.14295	1.23586e-08
Gm43003	1.37961	1.60391	0.321811		Gm28347	0.724251	0.888706	0.696052		Gm2974	0.788901	0.763544	0.675313		Psmd4	3.52278	0.29316	0.00924958		Cap1	-4.70159	-0.545527	6.24116e-05		Nabp2	-4.04672	-0.725725	0.00118775		Rab10	6.85329	0.763853	2.90817e-10		Lef1	-4.16463	-0.617631	0.000716474		Mical1	3.16776	0.696289	0.0334374		Ube2r2	6.34636	0.991274	1.11492e-08
Pdzd4	1.37961	1.60391	0.321811		B4galt4	0.722215	0.239546	0.696939		Gxylt2	0.788901	0.763544	0.675313		Mier1	3.5224	0.324594	0.00924958		Arpc4	-4.69457	-0.517476	6.43888e-05		Rbm17	-4.04478	-0.702259	0.00119298		Csnk1g2	6.85251	0.81459	2.94715e-10		Eif1b	4.15234	0.475565	0.00075331		Erh	-3.16557	-0.371077	0.0337297		Sytl1	6.34607	1.59849	1.24407e-08
Dnajc15	1.37363	0.106343	0.324943		2020-03-03	0.720197	0.197423	0.69839		Hist1h2bj	0.788094	0.378831	0.675987		Rac1	3.52238	0.277408	0.00924958		Drap1	-4.69101	-0.504485	6.54266e-05		Cdc25b	4.04347	1.08232	0.00119318		Haus3	6.85132	1.08207	2.99704e-10		Kif21b	-4.14983	-0.606521	0.000760249		Dtx3	3.16495	0.598095	0.0336138		Il16	6.33834	0.751679	1.12573e-08
4930537H20Rik	1.37076	1.24134	0.326412		Fam43a	0.719512	0.242342	0.698886		Gm28042	0.786385	1.50051	0.676203		Emsy	3.52158	0.453685	0.00926432		Mrpl57	-4.6867	-0.694096	6.6832e-05		Cd6	-4.04233	-0.513819	0.0011976		Pabpc1	6.85071	0.558094	2.94032e-10		Eny2	4.14977	0.612484	0.00076108		Cox20	3.16304	0.383564	0.0337297		Ap1s1	6.33575	1.44801	1.28949e-08
Trmt61a	1.36895	0.278243	0.32723		Optn	0.716787	0.489609	0.70093		Rab33a	0.786385	1.50051	0.676203		Mrpl45	3.52128	0.673224	0.00926432		H2-Ob	-4.68544	-1.76563	6.84081e-05		Rbm8a	-4.04162	-0.449854	0.00120109		Arpp19	6.8469	0.569122	2.94715e-10		Ccdc124	4.1493	0.640748	0.00076108		Wdr46	-3.16299	-0.904646	0.0338416		Ifi30	6.33306	1.84984	1.42663e-08
Sfn	1.36712	0.230455	0.328135		Hars	0.713607	0.0836679	0.703053		Spag8	0.786385	1.50051	0.676203		Cct4	3.51786	0.274132	0.00935247		Ttc39b	-4.68427	-0.724842	6.75278e-05		Rasal3	-4.04161	-0.492092	0.00119934		Herc1	6.84549	0.913647	3.05779e-10		Stat6	4.14916	0.663919	0.00076108		Gna15	3.16244	0.985277	0.0337562		Arid4a	6.33036	0.834418	1.16787e-08
Gm16124	1.36621	0.29416	0.328555		Irgm1	0.710536	0.0800127	0.704917		Slc16a2	0.786385	1.50051	0.676203		Pum2	3.51758	0.375536	0.00935991		Rbfa	-4.68227	-1.02489	6.82415e-05		Irak1	-4.03953	-0.786572	0.00120944		Samd9l	6.84307	0.988264	3.19457e-10		Prdx5	4.14853	0.41838	0.000761236		Polr3e	-3.159	-1.59539	0.0343003		Anapc13	6.3276	1.17053	1.33921e-08
Pole4	1.36415	0.0980977	0.32944		Oat	0.708807	0.0924716	0.704917		Sptbn2	0.786385	1.50051	0.676203		Trac	-3.51517	-0.262237	0.00942599		Atp2b1	-4.677	-0.634781	6.98794e-05		Txnl1	-4.03771	-0.545671	0.00121404		Rasgrp1	6.83619	0.787731	3.19554e-10		1700025G04Rik	-4.14728	-2.69782	0.000796476		Pdk1	-3.15796	-0.627392	0.0342751		Fbxl8	6.31959	1.70655	1.43471e-08
Mettl21c	1.36264	0.951837	0.330225		Ryr2	0.708526	0.770061	0.704917		4930525G20Rik	0.786385	1.50051	0.676203		Cd200	3.51452	0.685332	0.00945284		Dusp11	-4.6767	-0.542381	6.94238e-05		Hdac7	-4.03293	-0.741736	0.00125214		Adam19	6.83438	1.17027	3.35724e-10		Ddx28	4.14635	1.18914	0.000771177		Isyna1	-3.15618	-0.764499	0.0344366		Pfdn1	6.31888	1.04583	1.28949e-08
Hsd17b1	1.35919	2.14823	0.332175		Zfp59	0.70713	0.608598	0.704917		Gm15541	0.786385	1.50051	0.676203		Trim56	3.51296	0.549373	0.00949192		mt-Nd3	-4.67657	-0.288517	6.98254e-05		Sub1	-4.03194	-0.34981	0.00124252		Ankrd17	6.83389	0.879242	3.37514e-10		Ppia	4.14627	0.301499	0.000768974		Lcp2	3.15098	0.350051	0.0348566		Gm10076	6.31885	0.968588	1.28271e-08
Nop14	1.35637	0.145438	0.333465		Gm9887	0.705333	0.995621	0.704917		Gm27241	0.786385	1.50051	0.676203		Zfp260	3.51196	0.500277	0.00951893		Rbm39	-4.6746	-0.27378	6.99365e-05		Eif3b	-4.03046	-0.747193	0.00125516		Gpi1	6.83072	0.568737	3.23008e-10		Ide	4.14554	0.855202	0.000772669		TdTomato	3.15053	0.538737	0.0348851		Arhgap9	6.31642	0.856115	1.30896e-08
Alg11	1.3551	0.291174	0.334079		Syne4	0.705063	0.437326	0.704917		Nrip3	0.786385	1.50051	0.676203		Myc	3.51079	0.766015	0.00953594		Lipa	-4.67406	-1.15944	7.05458e-05		Rsl1d1	-4.02853	-0.615335	0.00126649		Kdm2a	6.82767	0.841967	3.37945e-10		Pde6d	4.1451	0.815999	0.000772669		Zmym5	3.149	0.555113	0.035022		Parp9	6.3164	1.33985	1.36569e-08
Thumpd2	1.35439	0.25207	0.33439		Fggy	0.704154	0.346911	0.704917		Scg3	0.786385	1.50051	0.676203		Eci2	3.50815	0.549192	0.00960889		Lsm12	-4.67272	-0.711043	7.05458e-05		Ikzf1	-4.02758	-0.502019	0.0012581		Sys1	6.82509	0.714013	3.45391e-10		Txk	-4.14481	-0.966515	0.00077439		Nsun2	-3.1456	-0.715642	0.0355385		Pmm1	6.31594	2.15171	1.67933e-08
Trim65	1.35079	0.17511	0.336259		Cpb1	0.703662	2.1111	0.704917		Epor	0.786385	1.50051	0.676203		Suclg2	3.50807	0.665186	0.00960889		H2-Q6	-4.67024	-0.416528	7.1728e-05		Gng12	-4.02489	-1.4515	0.00129019		Hadhb	6.82434	0.825996	3.52067e-10		Zcchc11	-4.14347	-0.512724	0.000773555		Tmem256	3.14325	0.506329	0.0355986		Ikzf3	6.31178	1.22989	1.4068e-08
Card11	1.35037	0.158726	0.336358		Hist1h4b	0.701588	0.358191	0.704917		Me3	0.786385	1.50051	0.676203		Map7	3.50725	1.21383	0.00967638		Ndufv2	-4.65889	-0.60029	7.49828e-05		H2afj	-4.02482	-0.394108	0.00127101		Tacc1	6.81933	1.08301	3.7236e-10		Cebpa	4.13899	2.1775	0.000805292		Atxn1	3.14088	0.699611	0.0358639		Ost4	6.30699	0.705028	1.35047e-08
Gm11342	1.34199	20.8889	0.340285		Foxp2	0.700235	1.37413	0.704917		Gprc5a	0.786385	1.50051	0.676203		Npepps	3.50631	0.524242	0.00966281		Ywhab	-4.65695	-0.466576	7.55905e-05		Sf3b1	-4.02403	-0.325028	0.00127401		Mysm1	6.81878	1.03571	3.74255e-10		Fkbp2	4.13654	0.866314	0.000800451		Gcnt1	3.13944	1.92246	0.0362925		Pdcd4	6.30209	0.707518	1.38686e-08
Clic5	1.34181	2.82631	0.340285		Samd4	0.700235	1.37413	0.704917		Lpar5	0.786385	1.50051	0.676203		Id2	-3.50189	-0.924796	0.00987748		Fermt3	-4.65324	-0.566351	7.66672e-05		Klhdc4	-4.02065	-1.33735	0.00130345		H2afy	6.8186	0.614267	3.5603e-10		Elof1	4.13189	0.624006	0.000808341		Cklf	3.13787	0.572007	0.0361957		Uqcc3	6.2992	0.91936	1.40053e-08
2810004N23Rik	1.34152	0.153116	0.340298		Tmod2	0.700235	1.37413	0.704917		Hist1h4k	0.786385	1.50051	0.676203		Tigit	-3.49875	-2.78115	0.0100579		Ppp1ca	-4.64888	-0.400661	7.91107e-05		Tspan31	-4.0175	-1.0271	0.00131352		Rheb	6.81246	0.786138	3.68077e-10		Pfdn1	4.13127	0.5715	0.00080963		Tmsb15l	3.13555	1.20706	0.0365303		Psme1	6.29225	0.630414	1.4068e-08
Cecr6	1.33945	0.826306	0.341337		Scrt1	0.700235	1.37413	0.704917		Ermap	0.786385	1.50051	0.676203		Abi3	3.49743	0.634106	0.00994957		Ddx18	-4.6463	-0.683662	7.98388e-05		Carnmt1	-4.01565	-1.13945	0.00132019		Baz1b	6.80888	1.00238	3.93003e-10		Tmed5	4.12066	0.544702	0.000845039		Naa15	-3.13401	-0.571933	0.0366172		Psma1	6.28686	0.914519	1.54665e-08
Gm36266	1.33726	0.433988	0.342478		Cbx7	0.699856	0.0691992	0.704917		Boc	0.786385	1.50051	0.676203		Sbno1	3.49699	0.356077	0.00994957		Rrp9	-4.64436	-1.23883	8.17383e-05		Abcg1	-4.01449	-0.820969	0.00131991		Nedd8	6.80509	0.584907	3.80101e-10		Anp32b	4.11982	0.391953	0.000845039		Mapk11	-3.1329	-1.41888	0.0369202		Cope	6.27851	0.94415	1.66187e-08
Sdc3	1.32807	0.671028	0.347252		Zfp248	0.699062	0.374132	0.704917		Gm26718	0.786385	1.50051	0.676203		Gsk3b	3.49127	0.371264	0.0101315		Cmtm6	-4.64188	-0.912374	8.11832e-05		Polr2k	-4.01441	-0.58353	0.00131991		Arfgef1	6.80426	0.933174	4.05908e-10		Jak2	4.11923	0.782946	0.000848551		Them6	-3.13002	-0.796443	0.036963		Blmh	6.2779	1.2934	1.69224e-08
Ppan	1.32297	0.166475	0.349729		Acot6	0.698438	0.494426	0.704917		Gstt3	0.78462	0.447398	0.677192		Plcg1	3.49122	0.486856	0.0101315		Sbds	-4.64112	-0.740851	8.09492e-05		Nt5c3	-4.01266	-0.809664	0.00132239		Irf3	6.80366	0.898872	3.97122e-10		Clptm1l	4.11604	0.583193	0.000860546		Srsf6	-3.12666	-0.451051	0.0373432		Cpm	6.27509	2.53788	2.18282e-08
Oasl2	1.3207	0.395149	0.351025		Gm9776	0.698438	0.494426	0.704917		Tstd1	0.784417	0.462541	0.67732		Sp6	3.48284	0.815623	0.0104394		Nap1l1	-4.63834	-0.720827	8.31382e-05		Plagl2	-4.01135	-1.13219	0.00134106		Ftl1	6.79588	0.471705	4.01177e-10		Fam98b	4.11274	0.895454	0.00087332		Cetn2	3.12581	0.442747	0.0373432		Snrnp25	6.2744	1.57887	1.86797e-08
Gm10250	1.32019	0.743844	0.351318		Adam15	0.697389	0.239995	0.704917		Slc6a20b	0.783512	0.418047	0.677881		Dennd1c	3.48272	0.406694	0.010436		Setx	-4.63762	-0.866992	8.27677e-05		Lysmd2	-4.00801	-0.900606	0.00134899		Tox	6.79409	0.974167	4.18583e-10		Snrpa	4.11253	0.719564	0.000869889		Diaph1	3.12528	0.418484	0.0373562		Taok3	6.27168	1.11868	1.70703e-08
Gm26549	1.31884	0.496998	0.351793		Edaradd	0.695127	0.465763	0.704917		Adamtsl4	0.781245	0.319937	0.6795		Fam105a	3.48138	0.321636	0.0104577		Pear1	4.63577	0.782533	8.25111e-05		Tm2d3	-4.00782	-0.711429	0.00134862		Copa	6.78824	0.918443	4.39476e-10		Irf2bpl	-4.10534	-0.587872	0.00089639		Ppm1m	3.12265	0.490769	0.0375999		Nsmce1	6.26675	1.00837	1.73005e-08
Bank1	1.31604	0.345977	0.353175		Gm26867	0.69472	0.344075	0.704917		Fam161a	0.780859	0.600045	0.679792		Lpp	3.47958	0.971378	0.0105545		Lamtor2	-4.62852	-0.45888	8.53148e-05		Ak2	-4.00748	-0.574296	0.00134899		Zbtb1	6.78802	0.935766	4.42044e-10		Clptm1	4.10512	0.784809	0.0008985		Ogt	3.1226	0.282886	0.0375999		Chmp5	6.26599	1.03528	1.77311e-08
Commd9	1.31489	0.225814	0.353775		Fsd2	0.694402	0.236629	0.704917		Tbc1d23	0.779673	0.237475	0.680727		Rab3gap1	3.4781	0.503885	0.0105687		Mlec	-4.62565	-0.795254	8.68275e-05		Mtx2	-4.0069	-0.911145	0.00135097		Zfp207	6.78642	0.806563	4.3629e-10		Serp1	4.10387	0.554755	0.00089886		E130308A19Rik	3.12157	0.981958	0.037782		Eif3d	6.25592	0.850319	1.77618e-08
Bbof1	1.31434	1.08934	0.353983		B630019K06Rik	0.693296	0.393498	0.704917		Mipol1	0.77842	0.237475	0.681359		Cpsf6	3.47692	0.422351	0.0106021		Bzrap1	4.62558	1.55723	8.7258e-05		Arpc5l	-4.00636	-0.41966	0.00135097		Neat1	6.78534	0.988433	4.53176e-10		Pim1	4.10235	0.485944	0.000902313		Mocs2	3.12132	0.685006	0.0377539		Cyth4	6.25302	0.893941	1.80179e-08
Sdhaf3	1.31253	0.322732	0.354976		Kcnh2	0.692871	0.312732	0.704917		Gm38336	0.778214	0.675596	0.681437		Fnip1	3.47543	0.804035	0.0106591		Gls	-4.625	-0.647345	8.66568e-05		Fis1	-4.00577	-0.40078	0.00135097		Ube2h	6.78141	0.788141	4.40313e-10		Rac2	4.10216	0.304296	0.000904446		Irf2bp2	-3.11987	-0.531384	0.0379118		Cox7a2	6.24734	0.721206	1.93525e-08
C530050E15Rik	1.31024	0.353236	0.35618		5430427O19Rik	0.691012	0.448133	0.704917		Perm1	0.77812	0.822437	0.68146		Ermard	3.47467	0.864462	0.0106652		Rnf138	-4.62492	-0.883302	8.69275e-05		Il27ra	-4.00504	-0.555723	0.00135238		Fam49b	6.77702	0.627425	4.55137e-10		Hivep2	4.10106	0.6322	0.000906176		Atp6v1e1	3.11273	0.476518	0.0386639		Snrpc	6.24246	1.02299	2.08685e-08
Zfp174	1.30926	0.826306	0.356604		Cul9	0.689888	0.236629	0.704917		Gaa	0.769952	0.223928	0.687711		Pofut1	3.47459	0.653788	0.0106652		Rars	-4.6234	-1.02487	8.86237e-05		Ergic1	-4.005	-1.25637	0.00136417		Faah	6.77484	0.918626	4.79095e-10		Cct5	4.09942	0.430082	0.000909397		Wdr74	-3.11169	-0.849437	0.0388846		Psma3	6.24069	0.683788	1.96428e-08
Mrps18b	1.30607	0.146999	0.358345		Hoxc9	0.688029	0.596525	0.704917		1700019D03Rik	0.76987	0.191304	0.687711		Amn1	3.47373	0.582672	0.0106804		Trim12a	-4.61776	-0.590326	8.90695e-05		Dctn2	-4.00372	-0.666052	0.00136044		Brk1	6.77045	0.613845	4.79095e-10		Cfdp1	4.09865	0.504974	0.000912512		Snx14	3.11066	0.718506	0.0389052		Rab10	6.23989	0.887386	1.9587e-08
Sac3d1	1.29357	0.225507	0.36292		Stx2	0.686676	0.284247	0.704917		Arhgef5	0.769588	0.242019	0.687711		Sapcd1	3.47211	1.93254	0.0108549		Rala	-4.61621	-0.873651	9.02178e-05		Ly6c1	-4.00323	-1.46234	0.00138635		Ctsa	6.76949	1.10721	5.05412e-10		Litaf	4.0976	1.63255	0.000931818		Mcl1	3.10784	0.238204	0.0391437		2020-03-02	6.23219	1.13353	2.14477e-08
Unc5a	1.293	0.951837	0.363224		Zfp286	0.685452	0.508433	0.704917		2610020C07Rik	0.769482	0.500509	0.687711		Epc1	3.47173	0.514843	0.0107306		Eif3c	-4.61543	-0.50667	9.11545e-05		Ccs	-4.00202	-0.598371	0.0013662		Dnajc1	6.76855	0.922777	4.87691e-10		Mus81	4.09527	0.928188	0.000930199		Man2a1	3.10758	0.642185	0.0391635		Arl6ip1	6.22031	0.564337	2.07124e-08
Parp3	1.29231	0.134067	0.363603		Rogdi	0.684909	0.272034	0.704917		Arhgap31	0.768613	0.069473	0.687711		Gpatch8	3.46869	0.40868	0.0108419		Ict1	-4.61083	-0.690268	9.17472e-05		Rbm5	-4.00116	-0.450311	0.00136548		Slbp	6.76765	1.02859	5.08914e-10		Rhof	4.08967	0.523862	0.000947244		Lamtor1	3.10698	0.377347	0.0391736		Hnrnpc	6.21	0.791261	2.27978e-08
Gm26801	1.2911	2.41127	0.363878		Kdf1	0.684156	0.959095	0.704917		Slc22a17	0.767799	0.389478	0.687711		Tespa1	3.46773	0.46365	0.0108565		Sgf29	-4.61042	-1.15927	9.28413e-05		Ube2l3	-3.9986	-0.429576	0.00138486		Ubxn1	6.76752	0.614408	4.88992e-10		Eif6	4.08177	0.494595	0.000972769		Runx3	3.1041	0.589649	0.0395161		0610012G03Rik	6.20772	1.12607	2.42275e-08
Gm12500	1.2911	2.41127	0.363878		Gm42529	0.684156	0.959095	0.704917		Gm44037	0.767765	0.443926	0.687711		Gadd45b	-3.46752	-1.08882	0.0109168		Ranbp1	-4.60899	-0.692974	9.48878e-05		Tmem165	-3.99592	-0.662357	0.00139262		Cyfip1	6.76739	1.11678	4.9593e-10		Slc25a19	4.08005	0.943044	0.000985735		Yipf1	3.10295	0.470361	0.0396068		2020-09-11	6.20526	1.75433	2.79291e-08
Ms4a8a	1.2911	2.41127	0.363878		A430073D23Rik	0.684156	0.959095	0.704917		AK157302	0.76438	0.822437	0.687711		Lemd2	3.4638	0.545809	0.0109879		Nipbl	-4.60863	-0.594655	9.27216e-05		Hmgb1	-3.9947	-0.30338	0.00140818		Sepp1	6.76506	0.964152	4.99243e-10		Ankrd44	-4.07808	-0.471405	0.000985735		Cited2	3.10241	0.545519	0.0397028		Psma7	6.20347	0.686014	2.29283e-08
Abca17	1.2911	2.41127	0.363878		Spata7	0.684156	0.959095	0.704917		Tfdp2	0.763725	0.162928	0.687711		Dnajc13	3.4634	0.67407	0.0109927		Mef2d	-4.60642	-0.742235	9.34382e-05		Suclg1	-3.99456	-0.505977	0.00140075		Nfkb1	6.76014	0.708088	5.09271e-10		Ndufc1	4.07802	0.501364	0.000985735		Cox14	3.10146	0.359415	0.0397028		Pla2g16	6.1991	0.802994	2.45002e-08
Psd3	1.2911	2.41127	0.363878		Amz1	0.684156	0.959095	0.704917		Lysmd1	0.76266	0.22843	0.687711		Egln3	-3.46282	-2.19971	0.0110623		Myo1g	-4.60589	-0.835259	9.45804e-05		Hspb11	-3.9912	-1.08426	0.00142319		Mapk1	6.76013	0.903643	5.29287e-10		Chrac1	4.07798	0.50218	0.000985735		Ccdc69	3.10043	0.712542	0.0399466		Aebp2	6.19339	1.11829	2.56786e-08
Nsg1	1.2911	2.41127	0.363878		1010001B22Rik	0.684156	0.959095	0.704917		Lrrc23	0.760837	0.915547	0.687711		Ube3a	3.46148	0.377975	0.0110468		Kxd1	-4.60389	-0.73102	9.41556e-05		Srsf7	-3.99107	-0.533938	0.00142319		H13	6.75485	0.821845	5.3142e-10		Nubp1	4.07133	0.696007	0.00101468		Noc4l	-3.09902	-1.04603	0.0400656		Glrx3	6.1869	0.921372	2.61569e-08
Gm10851	1.2911	2.41127	0.363878		Gm43087	0.684156	0.959095	0.704917		Gm9903	0.760837	0.915547	0.687711		St6galnac3	3.46113	0.71277	0.0110487		Rbm7	-4.6006	-0.723877	9.51539e-05		Trib2	-3.98958	-0.821794	0.00142937		Ost4	6.75285	0.569548	5.25369e-10		Mrpl17	4.07029	0.726721	0.00101714		Tsc22d4	3.09752	0.282814	0.0400693		Ube2f	6.18605	1.20762	2.78265e-08
Gm12264	1.2911	2.41127	0.363878		Gm16196	0.684156	0.959095	0.704917		Crybb3	0.760837	0.915547	0.687711		Sptssa	3.46071	0.33312	0.0110487		Sri	-4.59855	-0.386138	9.63404e-05		Sit1	3.98912	0.633344	0.00142285		Kat6a	6.75189	0.982296	5.46548e-10		Rnh1	4.0694	0.516301	0.00101714		Bcl3	3.09407	0.728031	0.040549		Dstn	6.18215	2.4068	3.69833e-08
Syk	1.2911	2.41127	0.363878		1810010H24Rik	0.684156	0.959095	0.704917		Gm26808	0.760837	0.915547	0.687711		Zer1	3.46057	0.546198	0.0110487		Chmp4b	-4.59811	-0.462654	9.63404e-05		Rcc2	-3.98799	-0.694374	0.00143368		Ski	6.75045	0.835684	5.42413e-10		Eif3b	4.06705	0.651502	0.00102734		Mob3b	-3.09217	-3.64602	0.0414295		Ap2m1	6.18041	1.02066	2.87506e-08
Trnp1	1.2911	2.41127	0.363878		Mfsd10	0.683945	0.0986068	0.704917		Fam227a	0.760837	0.915547	0.687711		Fam189b	3.45971	0.312647	0.0110623		Impdh1	-4.59379	-1.24212	9.95958e-05		Cd69	-3.98747	-0.861967	0.00145743		Ssu72	6.7497	0.682788	5.38761e-10		Ncf4	4.06352	0.586068	0.00104495		Bst2	-3.09165	-0.502784	0.0409931		Ppp4c	6.17885	0.908453	2.81346e-08
Ccdc22	1.28797	0.198275	0.365676		Zc3h6	0.679385	0.130392	0.705622		Sec14l2	0.759461	0.675596	0.687711		Kdm5b	3.45958	0.511342	0.0110623		Trip12	-4.59249	-0.682024	9.90757e-05		Mrpl2	-3.98561	-0.99749	0.00144697		Sharpin	6.74827	1.11915	5.67786e-10		Tmem38b	4.06262	1.17892	0.001056		Mrps23	3.08931	0.441598	0.0410295		Rgs14	6.17359	1.16032	2.98163e-08
Snhg6	1.28481	0.128334	0.367378		Sp6	0.679203	0.143248	0.705684		Csgalnact1	0.756726	0.763544	0.687711		Stx17	3.45951	0.872791	0.0110623		Ccdc64	-4.58951	-1.45479	0.000101954		Clec2d	-3.98365	-0.289439	0.00144697		Rnf19b	6.74591	1.23885	5.90073e-10		Dcun1d5	4.06215	0.539306	0.00104495		Pfn1	3.08788	0.209692	0.0412026		Gimap6	6.17269	0.6403	2.88916e-08
Pycr1	1.28018	1.56327	0.370116		Atp9a	0.679178	0.134557	0.705684		Cfp	0.756133	0.351131	0.687711		Rnase4	-3.45357	-1.61555	0.0113498		Ikzf3	-4.57979	-0.871674	0.000104399		Zbtb8os	-3.97798	-0.672574	0.00148249		Tpm4	6.74327	0.858108	5.79436e-10		Slc38a1	4.06068	0.715389	0.00105239		Arl4a	3.08683	0.586832	0.0413726		Actr10	6.17092	0.911622	2.9316e-08
Chrna9	1.28018	1.56327	0.370116		Gm26563	0.6786	0.508433	0.705986		Anxa9	0.755825	1.08547	0.687711		Relt	3.4479	0.838877	0.0115074		Cript	-4.57938	-0.66522	0.000104399		Smarce1	-3.97647	-0.552281	0.00148464		Cbx4	6.73923	0.954187	5.85898e-10		Pdcd4	-4.05945	-0.383892	0.00105518		Ptk2b	3.08576	0.459336	0.0413726		Pdcl3	6.16946	1.18899	3.15583e-08
Amer1	1.27961	0.187288	0.370233		Tmem191c	0.67803	0.101653	0.706343		Gm17518	0.755825	1.08547	0.687711		Rsbn1l	3.44151	0.289403	0.011744		Samd9l	-4.57479	-0.767855	0.000107528		Tpcn1	-3.97613	-0.906258	0.00149059		Zfp148	6.73801	0.862	5.82396e-10		Cdkn1b	-4.05566	-0.475996	0.00106959		Abce1	-3.08297	-0.775326	0.0418012		Rnf115	6.16846	1.2273	3.16948e-08
Ece2	1.27708	0.302744	0.371752		Eya2	0.677785	0.275217	0.706441		Amz1	0.755825	1.08547	0.687711		Fip1l1	3.44074	0.385953	0.0117665		Mat2b	-4.57371	-0.507641	0.000106911		Got2	-3.9751	-0.957104	0.00150141		Setd2	6.73738	1.01488	6.1102e-10		Ndufa3	4.05542	0.380856	0.00106959		Abhd17a	3.08153	0.41313	0.0418012		Gm42418	6.16766	0.440701	2.80716e-08
Hist2h3c2	1.27368	0.743844	0.373466		Cacna2d4	0.677323	0.171684	0.7067		Spata7	0.755825	1.08547	0.687711		Mfap1a	3.43894	0.524789	0.0118365		Metap2	-4.56629	-0.5814	0.000111232		Slirp	-3.97405	-0.760308	0.00150194		Fam96b	6.73574	0.8048	5.9749e-10		Arhgdia	4.05235	0.377938	0.00108282		Tanc1	-3.07926	-2.29809	0.0424909		Svbp	6.16331	1.10998	3.04991e-08
Sit1	1.27352	0.123288	0.373471		Insl6	0.676782	0.166239	0.706968		Zfp941	0.755196	1.4074	0.687711		Ptpn22	3.438	0.385161	0.0118684		Tpp2	-4.55687	-0.6572	0.000115566		Rel	-3.97376	-1.02745	0.00150947		Arpc3	6.7351	0.52808	5.77439e-10		Dld	4.04909	0.739695	0.0010969		Ssr1	3.07813	0.473393	0.0422302		Ppp2r1a	6.162	1.16116	3.28057e-08
Cpne2	1.27312	1.06077	0.373667		Aldh1b1	0.676358	0.303743	0.707289		Gm26508	0.751564	0.652512	0.687999		Maz	3.43792	0.332834	0.011861		Psma5	-4.55657	-0.585574	0.000116865		Atrx	-3.97264	-0.459818	0.0015044		Itga6	6.73389	0.886526	6.09016e-10		Scamp2	4.04786	0.69225	0.00110387		Sh3glb1	3.07654	0.311946	0.0423858		Syt11	6.15854	1.14859	3.15583e-08
A430078I02Rik	1.27138	1.12587	0.374428		4732440D04Rik	0.674548	0.150092	0.708667		4933427D14Rik	0.751416	0.258536	0.688054		Gm17173	3.43677	0.973326	0.0119236		Dnaja2	-4.55523	-0.488907	0.000116481		Mtdh	-3.97056	-0.444531	0.00151354		Pld3	6.73269	1.05952	6.10695e-10		C2cd4b	4.0471	2.89761	0.00115873		Tcn2	3.07532	1.05712	0.0424925		Lmnb1	6.15684	1.65724	3.4259e-08
Spon1	1.27137	0.978309	0.374428		Gm13248	0.674276	0.69606	0.708793		RP24-445D7.2	0.751343	0.822437	0.68806		Smarca2	3.43058	0.551631	0.0121526		Mtpn	-4.55441	-0.812303	0.000116877		Mtrr	-3.96934	-3.00556	0.00156543		Pon2	6.7302	0.900521	6.14491e-10		Exosc3	4.04503	0.554436	0.00111139		Arpc5	3.07531	0.319005	0.0424909		Psph	6.1531	1.33682	3.38222e-08
Bloc1s6os	1.27066	0.613312	0.374752		Klhl32	0.674276	0.69606	0.708793		Zdhhc1	0.750365	0.529655	0.688889		Ppp1r13b	3.42865	0.663282	0.0122148		Gfer	-4.55425	-1.01559	0.000117369		Hrsp12	-3.96826	-1.57408	0.00154584		Prpf40a	6.72894	0.797395	6.15743e-10		Sypl	4.04435	0.762226	0.00111404		Gng5	3.0749	0.212593	0.0424909		Rp9	6.14455	0.960921	3.54976e-08
Rasgrf2	1.27006	0.629909	0.375022		Gm26534	0.674104	0.645434	0.708826		Rph3a	0.749235	2.23748	0.689823		Mkln1	3.42654	0.366836	0.0122799		Qdpr	-4.55285	-1.0784	0.000118255		Fam96a	-3.96697	-0.565267	0.00153931		Tnrc6a	6.72801	0.76162	6.14491e-10		Arl6ip5	4.0438	0.395336	0.00111404		Ssr4	3.07433	0.328561	0.0424909		Arpp19	6.14023	0.64507	3.27787e-08
Rad9a	1.26999	0.210911	0.375022		Rcor2	0.673402	0.637167	0.709327		Colec11	0.748234	1.50051	0.690462		Nono	3.42623	0.308504	0.0122799		Fth1	-4.55075	-0.23813	0.000118255		Cct3	-3.96693	-0.457193	0.00153931		Peak1	6.72662	1.08505	6.44169e-10		Arpp19	4.04375	0.366273	0.00111461		Spsb3	3.07355	0.603949	0.0425501		Chmp3	6.13915	1.15363	3.54976e-08
Gm29095	1.26934	1.82631	0.375149		Amh	0.673402	0.637167	0.709327		Fgfbp3	0.747962	0.443926	0.690633		Csnk1a1	3.42604	0.293618	0.0122799		Dctn3	-4.5496	-0.561987	0.000118562		Xiap	-3.96234	-0.545349	0.00155678		Rab11b	6.71964	0.750348	6.36974e-10		Pitpnc1	-4.03757	-0.753764	0.00114186		Arhgef6	3.0721	0.463929	0.0426593		Oxa1l	6.13484	1.28918	3.68222e-08
Inca1	1.26934	1.82631	0.375149		D930048N14Rik	0.671618	0.78917	0.710502		Slc38a9	0.746213	0.203041	0.691908		Zcchc6	3.42517	0.499692	0.0123074		Eif3b	-4.54908	-0.848477	0.000120298		Fam104a	-3.96223	-0.439351	0.00155489		Rbx1	6.70681	0.553655	6.95323e-10		Atg16l2	4.03171	0.946879	0.00117061		Tceb2	3.07089	0.208013	0.0428235		Ndufa9	6.13156	1.09918	3.76271e-08
Kcnj16	1.26934	1.82631	0.375149		Gm26808	0.671618	0.78917	0.710502		Capsl	0.745042	0.383864	0.692787		Pcm1	3.42397	0.447154	0.0123508		Thoc7	-4.54568	-0.663283	0.000120418		Psmd12	-3.96172	-0.589049	0.00155915		Sltm	6.70576	0.844029	7.27582e-10		Eif3c	4.03074	0.431654	0.00116965		Klk1b27	3.06857	1.87796	0.043513		Sar1b	6.12028	1.00221	3.92045e-08
Gm26786	1.26934	1.82631	0.375149		Rgs10	0.669986	0.0419318	0.711717		Ryr3	0.73974	0.526981	0.696541		Galnt7	3.42281	0.656467	0.0123683		Nop14	-4.5451	-1.01858	0.000121892		Sar1b	-3.9608	-0.580946	0.00156086		Sdf2	6.70347	0.931408	7.21984e-10		Ufc1	4.03013	0.561057	0.00117164		Zbp1	3.06819	0.463729	0.0431076		Card19	6.1191	1.55828	4.30689e-08
Gm26745	1.26934	1.82631	0.375149		Lyl1	0.669504	0.295522	0.711963		Ercc5	0.73894	0.147277	0.697146		Dnmt3a	3.42253	0.508135	0.0123683		Timm10	-4.54299	-1.29305	0.000124398		Sdhb	-3.95778	-0.468061	0.00157658		Mphosph8	6.70222	0.910789	7.40242e-10		Cox20	4.02934	0.485607	0.00117616		Manf	3.06633	0.364907	0.0433177		Hras	6.11495	1.31239	4.2535e-08
Xlr3a	1.26934	1.82631	0.375149		4930590J08Rik	0.666261	0.526135	0.714643		Plpp1	0.737895	0.369265	0.697846		Ccs	3.42224	0.390036	0.0123683		Srsf7	-4.53591	-0.610847	0.00012686		Txndc17	-3.9563	-0.529931	0.00159059		Fkbp8	6.69988	0.692969	7.32879e-10		Ift80	-4.02791	-0.606968	0.0011817		Rragd	-3.06577	-1.60029	0.0435953		Yipf1	6.11231	1.08105	4.06563e-08
Ets2	1.26803	0.289706	0.375694		Txndc16	0.665885	0.198033	0.714855		Fbxw8	0.737311	0.201851	0.69825		Shc1	3.42121	0.63587	0.0124142		Hnrnpdl	-4.5347	-0.606072	0.000126271		Stambpl1	-3.9545	-0.928045	0.0016031		Cd101	6.69384	1.55595	8.1091e-10		Klrg1	4.02696	1.85528	0.00120947		Tdrp	-3.06544	-24.615	0.0443765		F2rl1	6.10221	1.78652	4.78074e-08
Acat2	1.26792	0.248936	0.375725		Phf19	0.664755	0.821591	0.715722		Ypel2	0.736874	0.213628	0.698521		Gimap1	3.42092	0.219688	0.0124142		Gadd45gip1	-4.5337	-0.721136	0.000126552		Cstb	-3.95357	-0.744149	0.0016031		H2afv	6.69267	0.689892	7.59963e-10		Syncrip	4.02587	0.559616	0.00118749		Acot8	3.06437	0.671506	0.0435745		Gtf3a	6.09732	1.10058	4.52375e-08
Siah1a	1.26743	0.204007	0.375916		Cdh1	0.661995	0.959095	0.717246		Tmem67	0.734699	0.425547	0.699737		Zfp36l1	3.41938	0.394132	0.0124656		Tars	-4.53033	-1.42245	0.000131282		Ankrd17	-3.95172	-0.579386	0.00160739		Fli1	6.69217	0.981512	7.87484e-10		Nhp2	4.02436	0.698176	0.00119095		Gprin3	3.06309	0.583878	0.0436399		Ghitm	6.09667	1.00646	4.55309e-08
Lynx1	1.26427	0.688802	0.377704		Pcdhgb7	0.661995	0.959095	0.717246		Ephx1	0.733765	0.0851118	0.700371		Rcan3	3.41795	0.777767	0.0125209		Mrpl15	-4.52549	-0.667651	0.00013181		Itk	-3.95035	-0.620093	0.00161474		Eif4a2	6.68829	0.551708	7.71589e-10		Rpia	4.02432	0.625599	0.00119095		Cdca7l	-3.06303	-1.15606	0.0437667		Ccm2	6.09193	0.803779	4.37503e-08
Zfp345	1.26299	0.826306	0.378328		Pla2g4c	0.661995	0.959095	0.717246		Gm10840	0.732671	1.08547	0.700892		Dbp	3.41497	0.661494	0.012623		Fam107b	-4.52427	-0.552763	0.000131957		Atp6v1d	-3.9475	-0.535738	0.00163177		Fubp1	6.68814	0.645613	7.83466e-10		Ube2b	4.02428	0.368492	0.00119095		Igf1r	-3.06165	-0.603476	0.0437667		Runx3	6.08834	1.31659	4.739e-08
Socs3	1.2625	0.118115	0.378548		Cish	0.660996	0.0754553	0.718081		4930452B06Rik	0.732671	1.08547	0.700892		4930486L24Rik	3.41484	1.78612	0.0126616		Ndufa1	-4.52123	-0.430935	0.000134364		Lcp2	-3.94557	-0.46835	0.00164366		Lrba	6.68594	1.31082	8.47376e-10		Lsr	4.02415	1.87887	0.0012118		Akr1a1	3.05767	0.338387	0.0442042		Crot	6.08408	1.55769	5.22806e-08
Mylpf	1.25398	0.339428	0.383319		Slc22a5	0.658672	0.222743	0.719641		Galnt14	0.732671	1.08547	0.700892		Lrif1	3.4148	0.45271	0.012623		Rnf213	-4.52	-1.27094	0.000137124		Clns1a	-3.94378	-0.657949	0.00165936		Picalm	6.68246	0.955999	8.36888e-10		Rab21	4.02214	0.615661	0.00120599		Psmb9	3.0572	0.272678	0.0442176		Prkag1	6.08134	1.28749	5.22504e-08
Hspa9	1.25232	0.108752	0.384298		Gm26909	0.657082	0.307018	0.720869		Hist1h4b	0.731814	0.386338	0.701491		Selm	-3.41407	-3.20234	0.0127927		Ddx39b	-4.51936	-0.450366	0.000135147		Pik3ip1	-3.94285	-0.668105	0.00165936		Snx2	6.68133	0.901984	8.12759e-10		Tapbp	4.02163	0.393501	0.00120306		Arpc1a	3.05241	0.444848	0.0448211		Rgs19	6.08108	1.10791	5.03411e-08
Tmem41a	1.25099	0.442391	0.385088		1810011H11Rik	0.656578	0.324804	0.721265		Slc7a4	0.73167	0.629792	0.701491		Gigyf2	3.41327	0.516856	0.0126616		Rnf114	-4.51804	-0.751627	0.000135562		Polr2f	-3.94279	-0.52385	0.00166012		Glipr1	6.67824	0.991935	8.62988e-10		Tfe3	4.02096	1.06749	0.0012118		Cd2ap	-3.05185	-0.768149	0.044867		Gm26740	6.08088	0.736277	4.68613e-08
Abce1	1.24973	0.14222	0.385662		Gm15860	0.655737	0.78917	0.72184		Nrde2	0.731309	0.1864	0.701544		Ola1	3.41305	0.360681	0.0126616		Rbck1	-4.5178	-0.636086	0.00013534		Gimap9	-3.94208	-0.39198	0.00165936		Rad23b	6.67822	0.977994	8.39693e-10		Atp5o	4.02019	0.394793	0.00120782		Med10	3.05155	0.453599	0.044867		Nsa2	6.07731	0.669295	4.7725e-08
Nras	1.24689	0.120404	0.38734		Lysmd2	0.655353	0.0911982	0.722121		Gm26522	0.730831	0.290424	0.701803		Ago2	3.413	0.418178	0.0126616		Ost4	-4.51382	-0.402885	0.000137124		Sbds	-3.93901	-0.614291	0.0016786		Bzw1	6.67776	0.682553	8.27352e-10		Zdhhc2	4.0193	0.929984	0.0012118		Gsta4	-3.04973	-2.04892	0.0457255		Arhgap1	6.07724	1.34638	5.2953e-08
Gm14139	1.24403	0.826306	0.388995		Sema4f	0.653355	0.281023	0.722437		Chdh	0.730567	0.456788	0.701966		Rmnd5a	3.4112	0.581712	0.0127271		Ddx46	-4.50676	-0.648153	0.000142066		Gnai2	-3.93802	-0.292037	0.00169365		Polr2a	6.66841	0.842337	8.82113e-10		Nxpe3	-4.01482	-0.577161	0.00122807		Pebp1	-3.04971	-0.343555	0.0452243		Nmi	6.07693	0.868361	4.72928e-08
Slc35g1	1.24383	0.231075	0.389079		Abr	0.652294	0.0984977	0.723098		2900026A02Rik	0.729457	0.310538	0.70279		Cecr6	3.41087	2.86085	0.0128824		Arpc1a	-4.50532	-0.718513	0.000142975		Arpc3	-3.93662	-0.325559	0.00169365		Pkn1	6.66326	0.930638	9.36496e-10		Arhgap31	4.01108	0.48325	0.00124435		Sp110	-3.04854	-0.423999	0.0452438		Tpgs1	6.06861	1.35324	5.23593e-08
Alkbh4	1.24143	0.176346	0.390464		Rnf122	0.651161	0.177485	0.723683		D630036H23Rik	0.727853	0.915547	0.703881		Nlk	3.40903	0.649974	0.0127927		Nolc1	-4.50521	-1.18928	0.000145806		Echs1	-3.93575	-0.784744	0.0016995		Cox7a2	6.65968	0.554456	9.15271e-10		Ifitm2	4.01031	1.38262	0.0012542		Ifngr2	-3.04353	-1.0109	0.0459023		Atp1a1	6.06673	1.14957	5.4448e-08
Tagln2	1.24045	0.101135	0.390882		Tcf12	0.651075	0.0654751	0.723683		Obp2a	0.726379	2.23748	0.705044		Ubac2	3.40862	0.395826	0.0127927		Ddx3x	-4.50328	-0.850037	0.000144511		Hint2	-3.93572	-0.728903	0.00170024		Acap1	6.65945	0.758847	9.36496e-10		Med7	4.00443	0.884033	0.00128242		Atp6v0b	3.04285	0.391153	0.0459023		Pfkp	6.05861	1.10728	5.44233e-08
Gm12107	1.2402	0.488436	0.390882		Apol7e	0.651054	0.257939	0.723683		Cd46	0.725529	0.413046	0.705564		Gm6483	3.4061	0.442542	0.0128824		Cwc15	-4.50212	-0.522126	0.000143433		Fyb	-3.93361	-0.297229	0.00170566		Nr3c1	6.65943	0.955551	9.63241e-10		Angptl2	4.003	2.3788	0.00132654		Dpm2	3.04072	0.513026	0.0461767		Rom1	6.05797	3.58403	8.12961e-08
Clybl	1.23908	0.467852	0.390992		Loxl2	0.647197	0.821591	0.726607		Ddx43	0.724748	0.182148	0.706149		H2-Ob	3.40372	0.795038	0.0130148		Znrf2	-4.50163	-0.707867	0.000145011		Cxcr5	-3.93308	-1.20777	0.00171951		Ddx39b	6.65837	0.645736	9.38131e-10		Gm26669	3.99709	1.26598	0.00132654		Plxnd1	3.0386	0.855996	0.0464641		H2afj	6.05571	0.790562	5.72769e-08
Lrrc66	1.2389	1.82631	0.391107		Plxna1	0.645944	0.281023	0.727276		Cxcr2	0.721245	0.57451	0.708998		Vps13a	3.40255	0.537857	0.0130148		Ube2d1	-4.50038	-1.13878	0.000146019		Denr	-3.93075	-0.586871	0.00172259		Sub1	6.65751	0.540269	9.20797e-10		Phb2	3.99615	0.467527	0.00131798		Pogk	-3.03454	-3.62454	0.0477514		Rftn1	6.05566	1.32416	5.87012e-08
Hspb6	1.2385	0.647969	0.391254		Map10	0.644579	0.888706	0.728191		Fndc5	0.721021	0.752048	0.709081		Cdc40	3.39268	0.46107	0.0134678		Dhx15	-4.49943	-0.70463	0.000145822		Mea1	-3.92969	-0.728016	0.00173198		Psd4	6.65692	1.0836	1.00598e-09		Ormdl2	3.99613	0.69275	0.00132403		Uqcr10	3.03453	0.329663	0.0469788		Zbtb32	6.05242	4.49874	8.2607e-08
Sos1	1.23557	0.237863	0.392368		Rab3a	0.644578	0.211861	0.728191		Bcas1	0.716407	0.313424	0.712169		Arid1b	3.39138	0.52981	0.0135169		Ccr6	-4.49729	-2.01067	0.000153647		Tomm70a	-3.92773	-0.898942	0.00175143		Lrif1	6.65365	1.01784	1.00904e-09		Napa	3.99414	0.583314	0.00132654		Diexf	-3.03389	-1.61876	0.0473126		Ube2m	6.05166	0.901414	5.44233e-08
Scg5	1.23105	0.411268	0.394719		Junos	0.64435	0.508433	0.728256		Piga	0.716038	0.283278	0.712425		Tia1	3.39119	0.418409	0.0135185		Tonsl	-4.493	-0.443461	0.000148942		Akr1b3	-3.92598	-0.455938	0.00175414		Syngr2	6.65361	0.910889	9.58697e-10		Cltc	3.99399	0.627292	0.00132911		Wdr82	-3.03326	-0.537158	0.0472116		Rab11b	6.04549	0.863139	5.58774e-08
Sgf29	1.23089	0.144202	0.394739		Gm26737	0.643917	0.848064	0.728517		Pak1	0.71553	0.413046	0.712632		Tanc1	3.39095	1.1215	0.0135295		P4ha1	-4.4859	-0.818582	0.000154587		Atox1	-3.92466	-0.434576	0.00176231		Spint2	6.6516	0.861473	9.90888e-10		Lclat1	3.99339	0.904841	0.00134222		Abhd12	3.02877	0.710052	0.0477514		Dnaja2	6.04397	0.745574	5.58399e-08
Kcnab2	1.23061	0.149894	0.394768		Tchh	0.643523	1.69606	0.728741		Akap8l	0.71296	0.0870504	0.714119		Sidt1	3.38372	0.668432	0.013853		Cacybp	-4.48522	-0.563562	0.00015562		Fgfr1op2	-3.92359	-0.529512	0.00176231		Cyfip2	6.65073	0.868807	1.00598e-09		Cxcl10	3.99153	2.90417	0.00139908		Abr	3.02818	0.661498	0.0477514		Lrrc8c	6.04154	1.18991	5.99182e-08
Rrp9	1.22993	0.150071	0.39508		6430710C18Rik	0.643523	1.69606	0.728741		Gm3512	0.712615	0.474514	0.714119		Ccdc50	3.38367	0.592485	0.0138558		U2surp	-4.47154	-0.624745	0.000164498		Rab11b	-3.92252	-0.510283	0.00176861		Suv420h1	6.65024	1.00514	1.00679e-09		Arrdc4	3.99137	0.975352	0.00134614		Vps37b	-3.02779	-0.586874	0.0477514		Abhd8	6.03589	0.886312	5.96603e-08
Trim12a	1.22959	0.0805456	0.395219		E330009J07Rik	0.640051	0.200365	0.729619		Ssh3	0.712615	0.474514	0.714119		Rhoh	3.3807	0.212531	0.0139581		Tardbp	-4.47023	-0.731778	0.000165695		Rbm25	-3.92205	-0.348804	0.00176861		Cpsf6	6.64554	0.856328	1.00679e-09		Bspry	3.99	2.1405	0.001385		Tmsb15b1	3.02649	0.931855	0.0479711		Acadl	6.0299	1.18429	6.54751e-08
Nup107	1.22946	0.22737	0.395266		Gm26804	0.639142	0.549219	0.72994		Gm17296	0.709218	0.529655	0.715236		Tmem106b	3.38062	0.481381	0.0139581		Stk4	-4.46851	-0.552565	0.000166235		Phf5a	-3.92009	-0.589359	0.00178486		Ttc39c	6.6436	1.36434	1.03664e-09		Tle3	3.98633	0.706349	0.00136491		Pdcd11	-3.02577	-0.783807	0.0480161		Dph3	6.0221	1.09501	6.53053e-08
Gm16793	1.22931	1.56327	0.395342		Nr3c2	0.638234	0.288885	0.730572		Lrrcc1	0.708852	0.121997	0.715259		Ccr5	-3.37877	-3.6055	0.0142986		Klf3	-4.46744	-0.628213	0.000167139		Gadd45gip1	-3.91811	-0.600704	0.00179801		Fermt3	6.64126	0.717282	1.03664e-09		Fam104a	3.98317	0.412537	0.00137856		Hexa	3.0257	0.60153	0.0479711		Cox20	6.02195	0.870025	6.48037e-08
Cfap46	1.22848	1.17423	0.395734		Mtg2	0.637202	0.0922096	0.731256		Gm9828	0.707807	0.435414	0.71594		Gpbp1	3.37654	0.340006	0.0141475		Slc16a3	4.45708	1.81114	0.000178781		Banf1	-3.91254	-0.540565	0.00184562		Rap1b	6.63983	0.626218	1.05315e-09		Myo1c	3.98139	1.27861	0.00139908		Pusl1	-3.02553	-2.13449	0.0483414		Prkacb	6.02182	1.05669	6.65431e-08
6430550D23Rik	1.2246	1.08934	0.397926		Kcnab1	0.636312	0.473668	0.73194		Tnfrsf14	0.707292	0.474514	0.716221		Rsrc1	3.37567	0.460921	0.014179		Rcc2	-4.45511	-0.771544	0.000177783		Dera	-3.91158	-0.896425	0.00184133		Pdcd6	6.63591	0.684132	1.05022e-09		Trib1	3.9806	0.962856	0.00140125		Capza1	3.0241	0.375992	0.0480576		Ndufa2	6.02177	0.601352	6.24009e-08
Cyb5r1	1.22351	0.250034	0.398587		Fxyd2	0.632701	0.888706	0.734923		Itga5	0.707004	0.500509	0.716221		Rnf167	3.37437	0.339967	0.0142171		Bclaf1	-4.45342	-0.541429	0.000177149		Snrpc	-3.91079	-0.532296	0.00184562		Gpbp1l1	6.63526	0.95762	1.13746e-09		Setd5	3.977	0.553479	0.00140554		Amd1	-3.02333	-0.704941	0.0482713		Dhrs7	6.02078	1.19712	7.0682e-08
Fgfbp3	1.21002	0.536799	0.406839		Zc3h12b	0.631093	0.549219	0.736245		Zfp112	0.707004	0.500509	0.716221		Arid4b	3.37413	0.375943	0.0142171		Rara	-4.45226	-1.19788	0.000179271		Etfb	-3.90899	-0.630518	0.001856		Nfat5	6.63038	0.988476	1.13774e-09		Etfb	3.977	0.567242	0.00140554		Psma5	3.02087	0.363966	0.0483414		Clip1	6.02053	1.21013	6.65073e-08
Nt5c3	1.2078	0.115983	0.408035		Eef2k	0.630401	0.174523	0.736428		C230037L18Rik	0.707002	0.319937	0.716221		Abhd8	3.36806	0.350947	0.0144967		2810004N23Rik	-4.45118	-1.09685	0.000180056		Pin4	-3.90845	-0.539123	0.00186005		Psmb10	6.62765	0.60142	1.12343e-09		Map2	3.97664	2.28643	0.0014436		Ndufb11	3.02077	0.27619	0.0483414		Smarce1	6.01985	0.942427	6.67316e-08
Kcnip2	1.20751	0.278002	0.408035		Gdpd3	0.630135	0.473668	0.736435		1700041G16Rik	0.70351	0.566098	0.71834		A630023P12Rik	3.36692	0.466753	0.014553		Sema4d	-4.4499	-0.638209	0.000179757		Ascc1	-3.90729	-0.894692	0.00187021		Pcmtd1	6.62751	1.03229	1.19608e-09		Pcmt1	3.97635	0.568531	0.00140554		Smim24	3.01994	1.57186	0.0486344		Ddx5	6.01875	0.461713	6.37125e-08
Gfod2	1.20694	0.435516	0.408324		Plpp1	0.63012	0.322602	0.736435		Zfp729a	0.701263	0.199804	0.720155		Mysm1	3.36617	0.45728	0.0145686		Tagap	-4.44925	-1.34339	0.000184105		Tcf12	-3.90595	-0.609566	0.00187122		Coro2a	6.62121	1.00753	1.2192e-09		Psmd6	3.97474	0.544315	0.00141314		Tnk2	3.01986	0.722527	0.0484332		Camk2d	6.01625	0.825335	6.51767e-08
Gstcd	1.20175	0.348259	0.411291		F730311O21Rik	0.628258	1.1111	0.736657		Tmem106c	0.699717	0.2	0.721123		Vpreb1	3.3659	1.97994	0.0146702		Khdrbs1	-4.44903	-0.53243	0.000179757		Atpif1	-3.90488	-0.572293	0.00189495		Calr	6.62036	0.709339	1.1843e-09		Acot9	3.96799	0.70446	0.00145807		B630005N14Rik	3.01976	0.672967	0.0484332		Ggnbp2	6.01575	0.862233	6.66683e-08
Epm2aip1	1.20101	0.18245	0.411563		Apoc4	0.628258	1.1111	0.736657		Ctnnd1	0.69877	0.529655	0.721544		Atp5h	3.36345	0.189647	0.0146702		Trbc2	-4.44781	-0.313005	0.000180056		Slc25a4	-3.90486	-0.539097	0.00188205		Sod2	6.61951	0.845413	1.1899e-09		Cnp	-3.9659	-0.467579	0.00146164		Fkbp3	3.01956	0.289864	0.0484332		Crlf2	6.01313	0.923327	6.67316e-08
Foxd2	1.20014	0.647969	0.412045		Arhgef9	0.628258	1.1111	0.736657		Pcdhgc5	0.698524	0.652512	0.721706		Arrb1	3.36321	0.79879	0.0146982		Ydjc	-4.44756	-2.1021	0.000187167		Hypk	-3.90356	-0.539849	0.00188441		Ankra2	6.61692	1.04174	1.2197e-09		BC021614	3.95931	0.656735	0.00150544		Spint2	3.01715	0.415411	0.0486344		Rab27a	6.01198	1.55201	7.38635e-08
Aida	1.19645	0.140197	0.413722		Mtss1l	0.628258	1.1111	0.736657		Pptc7	0.698111	0.101698	0.721949		Hnrnpa2b1	3.35948	0.241139	0.0148324		Mknk2	-4.44649	-0.608486	0.000181512		Cd53	-3.90224	-0.328335	0.00188946		Pitpna	6.61622	0.660378	1.2038e-09		Npas4	3.95703	3.15234	0.00156829		Tmc8	3.0169	0.596274	0.0486671		Naa38	6.01078	1.01852	6.89475e-08
Map10	1.19545	1.17423	0.413722		Hoxc6	0.628258	1.1111	0.736657		Nupr1l	0.695633	0.822437	0.722797		Srsf5	3.35943	0.238984	0.0148324		Rad23b	-4.44502	-0.809669	0.000183361		Aldoa	-3.89798	-0.39609	0.00193873		Mkln1	6.61555	0.809229	1.2197e-09		Slc16a3	3.95365	1.69578	0.00155886		Csnk2b	3.0159	0.365169	0.0487225		Ctsb	6.00686	0.903024	6.82732e-08
2510046G10Rik	1.19487	0.349492	0.413722		Tagln3	0.628258	1.1111	0.736657		Dtnbos	0.695633	0.822437	0.722797		Myeov2	3.35853	0.301243	0.0148594		Anp32b	-4.44491	-0.425726	0.000184827		Mrps24	-3.89528	-0.430652	0.00193892		Man2a1	6.61489	1.2246	1.25274e-09		Isg20	3.95235	0.710689	0.00154268		Jak2	3.0131	0.665144	0.0492628		Ngdn	6.00132	1.04808	7.56818e-08
Yeats2	1.19113	0.249381	0.413722		Phlda2	0.628258	1.1111	0.736657		Tmod4	0.695633	0.822437	0.722797		Dnm2	3.35833	0.426173	0.0148601		Eif4e	-4.44159	-0.758748	0.000185821		Ckb	-3.89275	-1.4228	0.00197417		Snrnp70	6.61199	0.75369	1.2197e-09		Ndufb4	3.95158	0.399549	0.00154543		Ctnnbip1	3.01074	1.55504	0.0496666		Usmg5	5.99863	0.761528	7.16455e-08
1700067K01Rik	1.18647	1.24134	0.4144		Cntnap2	0.628258	1.1111	0.736657		Oplah	0.695633	0.822437	0.722797		Rabgap1	3.35811	0.595339	0.0148766		Psma6	-4.44086	-0.550089	0.000185827		Dcun1d5	-3.89079	-0.590791	0.00197397		Celf1	6.60996	0.798398	1.24412e-09		Snrnp40	3.95045	0.570969	0.00155466		Ndufb9	3.00985	0.283092	0.0495868		Inpp1	5.99635	1.1467	7.66169e-08
Glt8d2	1.18647	1.24134	0.4144		Cdhr3	0.628258	1.1111	0.736657		1700028J19Rik	0.695633	0.822437	0.722797		AI837181	3.35687	0.435081	0.0149013		Itm2c	4.43709	0.402607	0.000186757		Ppm1m	-3.89031	-0.663105	0.00197655		Zfp945	6.60711	1.17161	1.34601e-09		Dnaja2	3.9488	0.413535	0.00155886		Enpp5	3.00868	1.13179	0.0498151		Cdc37	5.99384	0.781882	7.43773e-08
Mgll	1.18158	1.41127	0.417271		Slc12a5	0.628258	1.1111	0.736657		Cib3	0.695633	0.822437	0.722797		Mink1	3.35332	0.599772	0.0150823		Cdc42se1	-4.43506	-0.644844	0.000188666		Dguok	-3.887	-0.520495	0.0019965		Lbr	6.60455	0.892837	1.34363e-09		Fam96b	3.94786	0.474525	0.00156053		Aldoc	3.0074	1.42787	0.0500736		Arf4	5.99255	0.820045	7.30502e-08
Gm20506	1.18099	0.603913	0.417467		Gm26778	0.628258	1.1111	0.736657		Tmem202	0.695633	0.822437	0.722797		Ccnt2	3.35237	0.422736	0.0151093		Capza1	-4.43185	-0.565341	0.000191756		Dbi	-3.88476	-0.538347	0.00202224		Cd4	6.60006	0.887728	1.34363e-09		Stk38	-3.94782	-0.583695	0.00156695		Emc7	3.0054	0.417078	0.0500736		Rab7	5.98898	0.866584	7.66412e-08
Gm26640	1.18002	0.647969	0.417918		Ltb	0.625066	0.0301266	0.739063		Gm5093	0.695633	0.822437	0.722797		Pdk1	3.34807	0.466116	0.015331		Mrpl21	-4.4296	-0.660714	0.000194817		Supt16	-3.88457	-0.629247	0.00202224		Chmp2a	6.59766	0.624286	1.32371e-09		Rbbp4	3.94363	0.42534	0.00158326		Wbp2	3.00396	0.447237	0.050266		Bri3	5.98694	0.93499	8.00557e-08
Necap2	1.17986	0.113786	0.417976		Pbld2	0.624235	0.433026	0.739499		Gm28942	0.695633	0.822437	0.722797		Ncapd3	3.34788	0.608541	0.015331		Sco2	-4.42337	-1.41168	0.000202589		Myo1f	3.88348	0.980701	0.00202227		Rpn2	6.5953	0.741392	1.34363e-09		Alad	3.94219	0.86483	0.00159679		Aff3	-3.0019	-1.02508	0.0506579		Srp19	5.98067	0.994422	8.41972e-08
Phxr4	1.17783	0.18245	0.419305		Il15ra	0.619685	0.146654	0.742945		Nanp	0.695633	0.822437	0.722797		Ramp1	3.34652	0.545094	0.0153783		Tapbp	-4.42337	-0.44046	0.000199334		Stra13	-3.88306	-0.55671	0.00202227		Ndufv3	6.59346	0.654076	1.3647e-09		Tmem165	3.94085	0.581889	0.0016016		Eif5	-3.00135	-0.307613	0.0506579		Bbip1	5.9795	1.12848	8.2607e-08
Klhl8	1.17669	0.515104	0.419877		Tmem136	0.617812	0.23266	0.744208		Gm17249	0.695132	0.453203	0.723187		Klf7	3.34242	0.676066	0.0155997		Nap1l4	-4.4195	-0.572331	0.000201895		Cops8	-3.88259	-0.728882	0.00202705		Serinc1	6.59192	0.864469	1.39416e-09		Derl1	3.94036	0.53985	0.0016016		Dimt1	-3.00132	-1.19423	0.0508153		Sema4d	5.97879	0.964158	8.21882e-08
Mgat4a	1.17469	0.237239	0.420909		Trav10n	0.61703	0.930526	0.744818		Mtmr7	0.692515	0.26522	0.725456		Spop	3.34183	0.369755	0.0155997		Ubxn1	-4.41506	-0.429031	0.000205057		Timm9	-3.88152	-1.3636	0.0020466		Ikzf1	6.59159	0.733837	1.39416e-09		Ube2a	3.93956	0.584972	0.00160417		Shfm1	2.99847	0.23036	0.0509471		Gm5547	5.97867	1.80775	9.06009e-08
Tmie	1.1743	0.360221	0.421138		Slc2a3	0.616022	0.0859615	0.745291		Proscos	0.690175	1.23748	0.727048		Zbtb4	3.34143	0.516766	0.0155997		Diaph1	-4.41404	-0.627267	0.000206684		Cfl1	-3.88138	-0.261881	0.00203998		Ube2q1	6.59113	0.902072	1.40744e-09		Anapc15	3.93889	1.07924	0.00161463		Hnrnpr	-2.99583	-0.395548	0.0513891		Tmem167	5.97633	0.829131	8.13617e-08
Ier2	1.17231	0.0990687	0.42221		Kctd17	0.614089	0.625671	0.746522		Whrn	0.689562	0.217575	0.727505		Tbl1x	3.34122	0.517064	0.0155997		Ipo5	-4.41334	-1.47057	0.00021233		Tax1bp1	-3.87594	-0.423478	0.00206695		Pkm	6.59073	0.622112	1.34605e-09		Cdc42	3.93728	0.31333	0.0016132		Atad3a	-2.99342	-1.28852	0.051772		Fcho1	5.97624	1.25925	8.47997e-08
Fastkd5	1.17083	0.374926	0.42293		Fndc5	0.614089	0.625671	0.746522		A630023P12Rik	0.688627	0.0817721	0.728109		Clint1	3.34115	0.355075	0.0155997		Timm13	-4.40646	-0.466611	0.000214987		Bin1	-3.87481	-0.546775	0.00207975		Ppm1g	6.58873	0.761711	1.40744e-09		Id3	3.93726	0.640458	0.00162166		Ndufb7	2.99317	0.273997	0.0516844		Traf5	5.97596	1.07499	8.49977e-08
Gm26869	1.17033	1.41127	0.423241		Gm15444	0.614089	0.625671	0.746522		Xlr3a	0.682821	1.23748	0.730866		Ypel2	3.3371	1.06339	0.0158159		Mfhas1	-4.40469	-1.44358	0.000218467		Tcp1	-3.87389	-0.497277	0.00208825		2020-09-15	6.58633	0.57088	1.39876e-09		Dcaf13	3.93664	0.695271	0.0016187		Sub1	2.99229	0.268547	0.051772		Kctd10	5.97432	1.52954	9.13927e-08
Pak1ip1	1.16595	0.0926184	0.425677		Tnfrsf26	0.613886	0.132471	0.746522		Gm42846	0.682821	1.23748	0.730866		Nup214	3.33629	0.594225	0.0158159		Tomm40	-4.40307	-0.884773	0.000218654		Sepw1	-3.87068	-0.277726	0.00210754		Emsy	6.58306	0.955067	1.51854e-09		Slc29a1	3.93633	0.825475	0.00162212		Nab1	2.99196	0.579064	0.051772		Necap2	5.97378	1.25268	8.84255e-08
Sh3gl1	1.1653	0.103446	0.426045		H3f3aos	0.613268	0.338508	0.746887		Gm43479	0.682821	1.23748	0.730866		Zfp207	3.33612	0.377782	0.0158159		Zcchc7	-4.40256	-0.55897	0.000216832		Bnip3l	-3.8704	-0.39717	0.00210754		Gabarapl2	6.58136	0.628204	1.467e-09		Mphosph6	3.93545	0.881756	0.00162754		Kbtbd11	-2.99159	-0.428188	0.051772		Tomm7	5.96732	0.631156	8.62107e-08
Flt3l	1.16521	0.143718	0.426066		Rragd	0.612345	0.149867	0.747602		Nckap5los	0.682821	1.23748	0.730866		Lamtor2	3.33599	0.271042	0.0158159		Tomm70a	-4.40211	-1.04514	0.000218467		Mrpl19	-3.86997	-0.873683	0.00210754		Ndufa1	6.58125	0.618103	1.467e-09		Cd160	3.93539	1.83367	0.00166097		Nop2	-2.99047	-1.26173	0.051951		Mrps24	5.96523	0.762019	8.52325e-08
Ndufaf4	1.16426	0.137524	0.4266		2010320M18Rik	0.611853	0.25026	0.747924		Gm37294	0.682821	1.23748	0.730866		Acrbp	3.3354	0.831301	0.0158449		Cotl1	-4.39945	-0.412877	0.000218654		Psmd7	-3.86982	-0.601946	0.00211092		Cd74	6.57912	1.12982	1.467e-09		Brk1	3.9349	0.367174	0.00162269		Smg1	-2.99016	-0.548366	0.0519347		Exosc3	5.96511	0.975734	8.58718e-08
Mlst8	1.16197	0.313856	0.427927		Slc15a2	0.606617	0.169018	0.7485		Spdye4b	0.682821	1.23748	0.730866		Hnrnpr	3.33033	0.329323	0.0160886		Serp1	-4.39767	-0.656764	0.000220878		Srsf10	-3.86925	-0.525472	0.00210754		Trappc6b	6.57694	0.822546	1.53784e-09		Yif1a	3.93387	0.796487	0.00162754		Anapc5	-2.98982	-0.509253	0.051951		Sipa1	5.96448	0.96469	8.83428e-08
C2	1.15997	0.674303	0.429233		Purg	0.604539	0.326826	0.7485		Cpt1b	0.682821	1.23748	0.730866		Mgst2	3.32944	0.348662	0.0161065		Irf7	-4.39214	-1.23422	0.000230811		Pet100	-3.86917	-0.58989	0.00210754		Psma2	6.57589	0.566259	1.4936e-09		Ndufab1	3.93035	0.479374	0.00164859		Mdn1	-2.98919	-0.806322	0.051951		Mospd3	5.96428	1.46319	9.37438e-08
Pygm	1.15877	0.72677	0.429661		F11r	0.604383	1.69606	0.7485		Gpr135	0.682821	1.23748	0.730866		Tigd2	3.32932	0.374919	0.0161065		Cyb5b	-4.39177	-0.848339	0.000226993		St13	-3.86841	-0.427241	0.0021155		Srp9	6.57258	0.556381	1.52924e-09		Mvb12a	3.9279	0.652673	0.00166971		Ptpn6	-2.98876	-0.488856	0.051951		Adss	5.96406	0.951833	8.71639e-08
Eif3k	1.15575	0.0501682	0.431206		Gm11032	0.604383	1.69606	0.7485		Gm5432	0.682821	1.23748	0.730866		Scmh1	3.32863	1.14344	0.0161822		Gcsh	-4.3888	-2.19994	0.000238431		Gtf3c6	-3.86736	-0.814508	0.00212414		Med13	6.57025	1.16584	1.60415e-09		Jade2	3.92645	0.790923	0.00167309		Cox6b1	2.98846	0.225743	0.051951		Zmat5	5.96216	1.02821	8.86597e-08
Pum3	1.15529	0.136489	0.431475		Vash2	0.604383	1.69606	0.7485		Ces2c	0.682821	1.23748	0.730866		Akap8l	3.32792	0.465903	0.0161822		Pigx	-4.38756	-0.603345	0.00023032		Hnrnpd	-3.86614	-0.471878	0.0021341		Sema4b	6.56863	1.18252	1.65547e-09		Morf4l2	3.92376	0.698519	0.00168963		Rcl1	-2.98734	-1.05393	0.0523528		Ino80b	5.95941	1.23844	8.94947e-08
A130014A01Rik	1.15115	0.25645	0.434086		Gm29155	0.604383	1.69606	0.7485		B3gnt8	0.682821	1.23748	0.730866		Syf2	3.32703	0.249771	0.0161826		Capza2	-4.38483	-0.479488	0.000232109		Erp29	-3.86606	-0.539704	0.00212778		Dhx36	6.56862	0.793814	1.60032e-09		Dnmt3a	3.92198	0.732645	0.00170903		Hgh1	-2.98648	-1.66368	0.052545		Faah	5.95857	1.05315	9.27915e-08
Eno3	1.15101	0.255249	0.434086		Gm15629	0.604383	1.69606	0.7485		Asxl3	0.682821	1.23748	0.730866		Spry1	3.32562	0.920427	0.0162615		2310036O22Rik	-4.37831	-0.384155	0.000239		Blmh	-3.86564	-0.764455	0.00213412		Pglyrp2	6.56672	0.898488	1.62494e-09		Cope	3.91941	0.464801	0.00171135		Fez2	2.9822	0.845236	0.0529062		Vta1	5.95694	1.26798	9.51561e-08
Slc35c1	1.15081	0.174229	0.434109		Mslnl	0.604383	1.69606	0.7485		Slc28a3	0.682821	1.23748	0.730866		Irak2	3.32468	0.834931	0.0163185		Tlr1	-4.37656	-1.27049	0.000243801		Tm9sf3	-3.8643	-0.48418	0.0021341		Tigd2	6.56565	0.851484	1.63271e-09		Cap1	3.91934	0.425529	0.00171135		Aimp2	-2.98107	-0.979272	0.0530766		Dnajb11	5.95403	0.953437	9.02609e-08
Gm43597	1.14716	0.593645	0.436389		Leap2	0.604383	1.69606	0.7485		Naip1	0.682821	1.23748	0.730866		Zfp646	3.32157	0.494167	0.0164587		Uchl3	-4.37224	-0.929766	0.000247023		H3f3b	-3.86325	-0.253382	0.00214324		Lsm14a	6.56506	0.856426	1.65547e-09		Wsb2	3.91611	0.807255	0.00173805		Slamf6	2.98091	0.409682	0.0529882		Arrdc1	5.95388	1.18322	9.39137e-08
Gm12204	1.14714	1.34088	0.436389		Chrng	0.604383	1.69606	0.7485		Tmem72	0.682821	1.23748	0.730866		Thoc7	3.32039	0.369567	0.0165006		Bri3	-4.36974	-0.579301	0.000247795		Mrpl34	-3.86324	-0.601758	0.00214324		Ldb1	6.56275	0.778616	1.66261e-09		Dusp16	3.91444	2.5163	0.00179502		St8sia1	-2.97979	-1.32053	0.0533748		Tmem59	5.95341	0.692625	9.05731e-08
Scarf1	1.14714	1.34088	0.436389		Gm9797	0.604383	1.69606	0.7485		Apoc4	0.682821	1.23748	0.730866		Amer1	3.32	0.684679	0.0165089		Arhgap30	-4.36804	-0.484292	0.000249114		Ube2m	-3.86293	-0.515852	0.00214324		Srsf3	6.56115	0.538594	1.61666e-09		Cdc37	3.90843	0.427799	0.0017864		Itpr2	2.9788	0.393007	0.0532073		Cd247	5.94995	0.807301	9.40232e-08
Dse	1.14678	0.665841	0.436576		D6Ertd527e	0.604383	1.69606	0.7485		Mpzl1	0.682821	1.23748	0.730866		Cnksr3	3.31996	1.04487	0.0165418		Nip7	-4.36341	-0.868498	0.000257147		Cnbp	-3.86241	-0.31869	0.00214324		Rchy1	6.55909	0.796281	1.68032e-09		Purb	3.90789	0.389358	0.0017864		Cela1	2.97739	1.96273	0.0537803		Acaa1a	5.94805	1.04616	9.55654e-08
5430402O13Rik	1.14627	0.688802	0.436694		Cdkl1	0.604383	1.69606	0.7485		Gm15337	0.682821	1.23748	0.730866		Zbtb14	3.31934	0.966092	0.0165581		Wnk1	-4.36241	-0.476158	0.000254996		Hscb	-3.8618	-0.923636	0.00215144		Cd47	6.55603	0.591146	1.70515e-09		Ltv1	3.90412	0.973402	0.00181755		Elk4	-2.97735	-0.518169	0.0534112		Elovl1	5.94631	1.36142	1.01418e-07
Dnaja3	1.14622	0.168364	0.436694		Gm37724	0.604383	1.69606	0.7485		Gm13199	0.682821	1.23748	0.730866		Pin4	3.31579	0.365706	0.0167011		Cyfip1	4.35848	0.759328	0.000259219		Gimap8	-3.86179	-0.485566	0.00214502		Arcn1	6.55422	0.99656	1.75916e-09		Psmd13	3.90251	0.527058	0.00182136		1810058I24Rik	2.97454	0.375646	0.0537374		Ptbp3	5.94577	0.745374	9.45819e-08
Nudc	1.145	0.0719325	0.437432		Gm15726	0.604383	1.69606	0.7485		Tagln3	0.682821	1.23748	0.730866		Gm26551	3.31525	0.914268	0.0167548		Canx	-4.35757	-0.666524	0.000262003		Naa38	-3.86162	-0.611955	0.00214502		Tbl1xr1	6.5542	1.09049	1.79631e-09		Znrf1	-3.901	-0.548934	0.00182722		Mmd	2.97283	0.678819	0.053931		Hsbp1	5.94436	0.786914	9.45819e-08
Amd1	1.14487	0.123812	0.437474		Olfr183	0.604383	1.69606	0.7485		Gm13889	0.682821	1.23748	0.730866		Ptpn2	3.31305	0.463452	0.0168233		Wdr1	-4.35724	-0.533728	0.000260279		Lbh	-3.86003	-0.386717	0.00215776		S100a13	6.54916	0.684681	1.73119e-09		H13	3.90097	0.491084	0.00182722		Ssh2	-2.97275	-0.434756	0.053931		Klf6	5.94174	1.0031	1.00184e-07
Dimt1	1.1429	0.187705	0.438698		Naalad2	0.604383	1.69606	0.7485		Ppp1r16a	0.682176	0.231622	0.731178		Wdr6	3.31071	0.68631	0.016965		Ube2j2	-4.35298	-0.734184	0.000264173		Anp32a	-3.85461	-0.275486	0.00220218		Nfic	6.54587	1.51606	1.96873e-09		Ctsc	3.90005	0.673264	0.00184381		Gm4070	-2.97179	-0.866039	0.0541711		Gyg	5.93946	1.5089	1.07437e-07
Dcp1b	1.14062	0.229755	0.439818		Six1	0.604383	1.69606	0.7485		C8g	0.681613	0.70696	0.731541		D2hgdh	3.31031	0.91919	0.016965		Purb	-4.35273	-0.452732	0.0002645		Reps1	-3.85421	-0.710964	0.00220535		Ssh1	6.54462	1.16191	1.94316e-09		Ggh	3.89557	0.817303	0.00187022		Trp53i13	2.9702	0.882327	0.0542818		Calm2	5.93767	0.619925	9.71084e-08
Zc3h8	1.13881	0.278818	0.43987		4930432B10Rik	0.604383	1.69606	0.7485		Ybey	0.681573	0.356119	0.731541		Rasa2	3.31018	0.496978	0.016965		Mapk11	-4.35007	-2.06244	0.000274946		Ptp4a3	-3.85225	-0.590726	0.00220789		Ier3ip1	6.54348	0.68042	1.81875e-09		Smarcb1	3.89514	0.656693	0.00186943		Taf1d	-2.96303	-0.569465	0.0554753		Sell	5.9365	1.32317	1.15585e-07
Pigw	1.13844	0.358527	0.43987		Ighg2c	0.604383	1.69606	0.7485		Prr5l	0.679136	0.652512	0.733416		2020-03-07	3.30959	0.405202	0.016971		Ltv1	-4.34767	-1.55615	0.000275381		Phactr2	-3.85119	-1.71203	0.00226325		Cyld	6.54217	0.906713	1.91745e-09		Prpf40a	3.89078	0.476559	0.00189556		Klf7	-2.96272	-0.89397	0.0555351		Hspa8	5.9345	0.550138	9.62758e-08
Icam2	1.13825	0.12557	0.43987		Spink13	0.604383	1.69606	0.7485		Zfyve9	0.679136	0.652512	0.733416		Srp9	3.30909	0.238623	0.016971		Esd	-4.34644	-0.49032	0.000272421		Naa20	-3.85052	-0.6608	0.00223177		Emp3	6.53873	0.610829	1.8943e-09		Dazap1	3.88985	0.540473	0.00190166		Anapc13	2.96226	0.423759	0.0554753		Gata3	5.9302	1.08017	1.07216e-07
Gm4737	1.13761	2.82631	0.43987		B230110C06Rik	0.604383	1.69606	0.7485		Gm17552	0.678767	0.319937	0.733624		Ppig	3.30876	0.33139	0.0169832		Sec24a	-4.34245	-1.00967	0.000276534		Mrps9	-3.84978	-0.751358	0.00223177		Wac	6.53869	0.842828	1.90953e-09		Lpcat1	3.88923	0.833612	0.00190844		Acads	2.96162	0.523322	0.0555351		Lcp2	5.92963	0.788209	1.01072e-07
Adcy1	1.13761	2.82631	0.43987		Gm14322	0.604383	1.69606	0.7485		Icam4	0.67788	0.400973	0.734221		Pgpep1l	3.3086	1.00216	0.0170084		Psmd7	-4.33113	-0.6585	0.000293416		Eea1	-3.84624	-0.964168	0.00229884		Galnt1	6.5371	1.04269	1.94303e-09		Serbp1	3.88898	0.346931	0.00190166		Adpgk	-2.95903	-1.20036	0.0560158		Ccdc124	5.9289	1.25215	1.15465e-07
2210406O10Rik	1.13761	2.82631	0.43987		Tdrd12	0.604383	1.69606	0.7485		Hist1h2bk	0.67771	0.947968	0.734221		Aven	3.30789	0.513106	0.0170084		Exosc5	-4.32912	-0.727579	0.000293474		Rasa1	-3.84612	-0.634116	0.00226587		Ndfip1	6.53466	0.822045	1.95005e-09		Blmh	3.88872	0.637342	0.00190368		Emc2	2.95643	0.521513	0.0563198		Pdcd2	5.92547	1.03005	1.09183e-07
Ccdc36	1.13761	2.82631	0.43987		Gm10479	0.604383	1.69606	0.7485		Gm20478	0.67771	0.947968	0.734221		Vav3	3.30732	0.766536	0.0170188		Pfdn4	-4.32432	-0.948584	0.000300293		E2f4	-3.84502	-0.740956	0.00226642		Mthfsl	6.5342	0.964793	1.94088e-09		Add3	-3.88808	-0.665182	0.00190844		Gzmb	2.9537	2.88483	0.0574345		Triobp	5.92091	1.23528	1.11733e-07
Gm20496	1.13761	2.82631	0.43987		Gm37350	0.604383	1.69606	0.7485		Polq	0.67771	0.947968	0.734221		Pip5k1a	3.30703	0.538285	0.0170239		Dnajc2	-4.31959	-0.698445	0.000304598		Map1lc3b	-3.83881	-0.348862	0.00231961		Ddx17	6.53191	0.906389	1.96168e-09		Nsg2	-3.88801	-0.863944	0.00191681		Usp24	-2.95019	-0.726925	0.0574345		H1f0	5.91946	1.87243	1.28885e-07
Gm16156	1.13761	2.82631	0.43987		2610305D13Rik	0.604383	1.69606	0.7485		4930562F07Rik	0.67771	0.947968	0.734221		Rtf1	3.2997	0.316963	0.0174257		Cd5	-4.31255	-0.489283	0.000313648		Mcts1	-3.83751	-0.584932	0.00233289		Hadha	6.52771	0.902453	1.99663e-09		Glipr2	-3.88167	-0.733831	0.00196294		Herpud1	2.94909	0.453928	0.0574388		Tmem256	5.90512	1.12646	1.19453e-07
Barhl1	1.13761	2.82631	0.43987		Ctnna3	0.604383	1.69606	0.7485		Bmyc	0.676775	0.0785906	0.734385		Gtf2a2	3.29796	0.350054	0.0175151		Aplp1	4.31024	1.1507	0.000318224		Hdac2	-3.83422	-0.805709	0.00236088		Mob1a	6.52681	0.913465	2.05913e-09		mt-Co3	3.8803	0.199885	0.00196079		Tmem108	-2.94763	-3.74223	0.0585968		Mrpl4	5.8964	1.16968	1.28475e-07
RP23-92E8.2	1.13761	2.82631	0.43987		Ihh	0.604383	1.69606	0.7485		Agbl3	0.67612	0.370741	0.734385		Mia3	3.29295	0.481543	0.0178138		Dgkd	-4.30318	-0.918894	0.000327555		Psmc1	-3.83409	-0.786404	0.0023618		Tes	6.52373	0.751032	2.0536e-09		Wdr1	3.87995	0.462766	0.00196632		Slc41a3	2.94712	1.08072	0.0578871		Sdf2	5.89261	1.01843	1.24985e-07
Fkbp14	1.13761	2.82631	0.43987		RP23-92E8.2	0.604383	1.69606	0.7485		Zfp36l1	0.675618	0.061382	0.734385		Klk8	3.29253	0.321617	0.0178138		Tes	-4.30133	-0.555944	0.000328597		Arpc2	-3.83225	-0.270937	0.00238173		Scp2	6.52313	0.597431	2.0536e-09		Polr2k	3.87745	0.508286	0.00197769		Gmfg	2.94464	0.38948	0.0581395		Myh9	5.89084	0.70731	1.25812e-07
Tmem52	1.13761	2.82631	0.43987		9530052E02Rik	0.604383	1.69606	0.7485		Zfp81	0.675327	0.213145	0.734385		Tra2a	3.29198	0.303021	0.0178514		Eif2s3x	-4.29794	-1.00741	0.000335205		Gm20696	-3.83072	-1.55529	0.0023985		Spn	6.52083	0.860775	2.10746e-09		Rbm3	3.87688	0.367297	0.00197769		Zfp593	-2.94331	-0.832431	0.0584762		Cited2	5.89055	1.09361	1.28885e-07
Gm15478	1.13761	2.82631	0.43987		Ptprn2	0.604383	1.69606	0.7485		Rec8	0.674305	0.26301	0.734385		Mbd1	3.29125	0.595902	0.0178788		Ostc	-4.29579	-0.503284	0.000335831		Mrps35	-3.83037	-0.743115	0.00238956		Mdm4	6.51858	0.923966	2.16157e-09		Atp5f1	3.87244	0.358573	0.0020166		Trappc2l	2.9431	0.443094	0.05835		Gna13	5.88956	1.04743	1.28475e-07
Lman1l	1.13761	2.82631	0.43987		Gm16150	0.604383	1.69606	0.7485		Alox12	0.671389	1.82244	0.734385		Atxn2	3.29061	0.655931	0.0179092		Nme2	-4.29402	-1.63378	0.000345149		Wdr61	-3.82931	-0.788547	0.00239875		Atp6v1d	6.51579	0.791023	2.19419e-09		2310036O22Rik	3.87211	0.330434	0.00201458		BC005561	-2.94163	-0.991376	0.0585968		Madd	5.88899	1.069	1.34374e-07
Slc22a23	1.13761	2.82631	0.43987		Myadml2	0.604383	1.69606	0.7485		Map1b	0.671389	1.82244	0.734385		Tulp4	3.28819	0.628697	0.0180676		Ttc13	-4.29191	-1.16247	0.000344748		Ube2d2a	-3.82771	-0.392352	0.00239947		Herc2	6.51494	1.10981	2.27888e-09		Tars	3.87187	0.907299	0.00202597		Rel	-2.94122	-0.808115	0.0586333		Elf4	5.88847	1.19759	1.34591e-07
Spats2	1.13761	2.82631	0.43987		Zscan30	0.604383	1.69606	0.7485		Jun	0.668832	0.063374	0.734385		Dpcd	3.28589	0.529916	0.0181478		Ppm1l	-4.29132	-2.65003	0.000357161		Mrps15	-3.82726	-0.604979	0.0024035		Copb2	6.51102	0.849526	2.20325e-09		Mapre2	3.86808	0.886694	0.00205481		Smc6	-2.93797	-0.410808	0.0590547		Osbpl9	5.88284	1.12022	1.37752e-07
Sec1	1.13761	2.82631	0.43987		Tcrg-V6	0.604383	1.69606	0.7485		Zscan2	0.667245	0.140231	0.734385		Ky	-3.28181	-24.2118	0.0187622		Serinc3	4.28599	0.365622	0.000347548		Frg1	-3.82702	-0.462485	0.0024035		Agpat3	6.50793	0.802212	2.25894e-09		Galm	3.86686	1.00365	0.00206766		Slc28a2	2.93708	0.522162	0.0591522		Lck	5.88183	0.488925	1.29296e-07
Gm43253	1.13761	2.82631	0.43987		Ncan	0.604383	1.69606	0.7485		Uvssa	0.666095	0.118935	0.734385		Pde7a	3.28104	0.715987	0.0184524		Casc3	-4.28559	-0.981233	0.000351308		Bzw2	-3.82491	-0.58727	0.00242531		Psap	6.50642	0.723361	2.25936e-09		Mob1b	3.86225	0.860949	0.00209805		Tbcd	2.93496	0.880757	0.0594451		Nckap1l	5.88025	1.2113	1.40076e-07
Plekhh1	1.13761	2.82631	0.43987		Gm26895	0.604383	1.69606	0.7485		Fhdc1	0.664801	0.47194	0.734385		Gpr174	3.27834	0.419224	0.0185869		Mcmbp	-4.28384	-0.697673	0.000352466		Ppp4r2	-3.82472	-0.550211	0.00242149		Nup153	6.50553	1.00698	2.34189e-09		Slirp	3.86005	0.621598	0.00210455		Szrd1	2.93482	0.566366	0.0594451		Sla2	5.87958	1.31623	1.45157e-07
1700030J22Rik	1.13761	2.82631	0.43987		Cadm1	0.604383	1.69606	0.7485		Rnf43	0.663275	0.128627	0.734385		Crebzf	3.27808	0.413979	0.0185869		Sh3gl1	-4.28137	-0.769604	0.000355494		Slc3a2	-3.8245	-0.536761	0.00242149		Tardbp	6.50532	0.882487	2.27888e-09		Slc52a2	3.85998	0.936594	0.0021102		Mthfd1l	-2.93445	-1.29129	0.0597042		Bscl2	5.8773	1.26338	1.42701e-07
Trbv5	1.13761	2.82631	0.43987		Mmp24	0.604383	1.69606	0.7485		Epcam	0.66218	0.107078	0.734385		Hnrnpa3	3.27628	0.2502	0.0186742		5830468F06Rik	-4.28008	-3.26167	0.000375266		Tap2	-3.8245	-0.387532	0.00242149		Psmd8	6.50359	0.647615	2.26631e-09		Mif	3.85839	0.592984	0.0021102		Fam160a1	-2.93437	-1.77076	0.0598566		Cklf	5.87368	1.24612	1.45634e-07
Ppil6	1.13761	2.82631	0.43987		Gm42902	0.604383	1.69606	0.7485		Pcdhgb5	0.661412	0.532931	0.734385		N4bp2l2	3.27495	0.337052	0.0187536		Tmem258	-4.27739	-0.404711	0.000360997		Rbm26	-3.82246	-0.700345	0.00244062		Cdk13	6.50108	0.965312	2.40685e-09		Hmg20b	3.8577	0.679531	0.00212442		Bcas2	-2.93319	-0.362962	0.0596767		Atp6v1g1	5.87207	0.737075	1.38229e-07
Wfdc12	1.13761	2.82631	0.43987		Arfgef3	0.604383	1.69606	0.7485		Crb3	0.659285	0.400973	0.734385		Rgs16	-3.27383	-1.27032	0.0189967		Ubald2	-4.27399	-0.679445	0.000365859		Slc35g1	-3.82195	-1.75832	0.00247418		Prr14	6.49861	1.1652	2.46579e-09		Sec14l1	3.85743	0.918911	0.00212846		Cd79b	2.93253	0.729947	0.0597042		Utp3	5.87165	0.90072	1.42701e-07
BC048644	1.13761	2.82631	0.43987		Iglc2	0.604383	1.69606	0.7485		Gm3248	0.658224	0.500509	0.734385		Ndufs2	3.27033	0.321901	0.0189967		Lyar	-4.27364	-1.05215	0.000371218		Ikzf3	-3.82059	-0.693769	0.0024547		Abracl	6.49855	0.580458	2.33398e-09		Sec11a	3.85453	0.366639	0.00213897		Atp1b1	-2.93165	-1.49976	0.0598566		Uqcr11	5.86208	0.695832	1.42952e-07
Ctcflos	1.13761	2.82631	0.43987		Rdh9	0.604383	1.69606	0.7485		A530032D15Rik	0.657987	0.448979	0.734385		Luc7l	3.27024	0.469147	0.0189967		Trac	4.27277	0.302702	0.000365859		Fam173a	-3.81997	-0.440601	0.0024547		Rab18	6.49604	0.922645	2.47264e-09		Tmsb15b1	3.84869	1.05819	0.00220102		Grpel1	-2.93128	-0.443708	0.0598566		Pgls	5.86204	0.788634	1.42952e-07
Tex26	1.13761	2.82631	0.43987		Gm16251	0.604383	1.69606	0.7485		Zfp82	0.657973	0.652512	0.734385		Ensa	3.26839	0.466798	0.0190939		Matr3	-4.2699	-0.460028	0.000371218		Eif2s1	-3.81875	-0.568959	0.00247463		Rela	6.4946	0.965017	2.50952e-09		Pik3r5	-3.84664	-1.77157	0.00224324		Manba	2.93085	0.888191	0.0598566		Fam96a	5.85959	0.997699	1.545e-07
Ptrf	1.13761	2.82631	0.43987		Gm20680	0.604383	1.69606	0.7485		Lrrc16a	0.657565	0.947968	0.734385		Fam134b	3.26783	0.343131	0.0190995		Atp6v1d	-4.26959	-0.56757	0.000371895		Malat1	-3.81837	-0.167741	0.00247463		Gprin3	6.49371	1.11029	2.54361e-09		Hbs1l	3.84559	0.928071	0.00222496		Atp5g1	-2.92984	-0.370571	0.0602597		Cdc42se2	5.85863	0.706807	1.49252e-07
4930471M09Rik	1.13761	2.82631	0.43987		Ccno	0.604383	1.69606	0.7485		Gpr19	0.655216	0.334151	0.734385		N4bp1	-3.26675	-0.577692	0.0191933		Btf3l4	-4.26353	-0.799533	0.000380715		Pcbp1	-3.81642	-0.421832	0.00249106		4932438A13Rik	6.49305	0.883201	2.49201e-09		Jun	-3.84446	-0.564554	0.00222427		Mrpl33	2.92485	0.315613	0.0607222		Rbm5	5.85861	0.716777	1.45157e-07
4933428P19Rik	1.13761	2.82631	0.43987		Asic3	0.604383	1.69606	0.7485		Cdc42bpa	0.653637	0.684934	0.734385		Kdm3b	3.26169	0.586076	0.0194859		Gm10020	-4.26253	-1.42234	0.000387417		Ccr9	-3.81585	-2.72713	0.0025431		Neu1	6.49157	1.08432	2.55791e-09		Ergic2	3.84245	0.584191	0.00223809		Qtrt1	-2.92273	-1.31288	0.0612297		Kcnn4	5.85824	0.753935	1.47289e-07
Thumpd1	1.13502	0.120591	0.441307		Gm1720	0.604383	1.69606	0.7485		Gigyf1	0.653023	0.0865691	0.734385		Slc25a3	3.26098	0.238643	0.0194935		Atp1a3	4.26221	3.0162	0.000398242		Grk6	-3.81447	-0.513458	0.00249784		Safb2	6.49115	0.828936	2.53539e-09		Tpm3	3.8378	0.323448	0.00227364		Ncf4	2.9225	0.409304	0.0611145		Cab39	5.8555	0.852935	1.50467e-07
Ptgir	1.131	0.638679	0.443791		Gli1	0.604383	1.69606	0.7485		Dgkg	0.652861	0.652512	0.734385		Tsn	3.2566	0.313609	0.0197955		Mtdh	-4.26169	-0.476363	0.000383627		Mrpl18	-3.81349	-0.476977	0.00250348		Cuta	6.48801	0.861963	2.58735e-09		Vps54	3.83661	0.601633	0.0022863		Unc13d	2.9218	0.514241	0.0612169		Ccndbp1	5.85501	1.03401	1.54463e-07
Scmh1	1.13	0.276109	0.444319		Gnat1	0.604383	1.69606	0.7485		Tmem132a	0.651225	1.23748	0.734385		Trim34a	3.25402	0.585037	0.0199461		Psmg1	-4.25986	-1.00527	0.000389215		Med8	-3.81346	-0.616689	0.00250652		Rnf4	6.48574	1.03168	2.65721e-09		Pspc1	3.83589	0.958305	0.00229917		Vps29	2.92117	0.378837	0.0612297		Vdac1	5.85402	1.08357	1.58239e-07
Cldn10	1.12724	0.578378	0.445577		Opn1sw	0.604383	1.69606	0.7485		Gm10721	0.651225	1.23748	0.734385		Ncoa3	3.25386	0.389681	0.0199461		Dnah8	-4.25944	-2.06952	0.000395151		Anapc13	-3.81169	-0.616863	0.00251518		Smad3	6.48089	1.4949	2.77537e-09		Rrp1	3.83303	0.407968	0.0023084		Sash3	2.92035	0.344776	0.0612898		Eif2b2	5.85294	1.27382	1.62239e-07
Gm3550	1.12679	0.58238	0.445577		Trim30b	0.604383	1.69606	0.7485		Ptprj	0.64716	0.179469	0.737199		Copa	3.25243	0.388363	0.0200039		Psmd6	-4.25739	-0.674123	0.000390392		Isy1	-3.80978	-0.837484	0.00253905		Dpm3	6.48025	0.73885	2.68234e-09		Kras	3.83094	0.546858	0.00233026		Havcr2	2.91469	3.17978	0.0632453		Acot9	5.849	1.24502	1.65457e-07
Zfp36l2	1.12587	0.0587905	0.445985		Gm12977	0.604383	1.69606	0.7485		Gm3558	0.645161	0.327672	0.738518		Gm16152	3.25158	0.761266	0.0200633		Edem1	-4.25502	-0.720765	0.000393761		Itgb7	3.8096	0.319748	0.00252429		Rsrc1	6.47778	0.961455	2.71466e-09		Phax	3.82954	0.528851	0.00233553		Chic2	2.91192	0.339308	0.0628732		Mob1a	5.84813	0.990859	1.56461e-07
Zfp639	1.1252	0.151832	0.446232		AC125149.2	0.604383	1.69606	0.7485		Ift122	0.644152	0.355311	0.73932		Slc50a1	3.25094	0.277838	0.0200639		Mpp1	-4.25444	-0.777269	0.000393761		Nop56	-3.80836	-0.640427	0.00256161		Timm10b	6.47437	0.69138	2.70197e-09		Cdc42ep3	-3.82882	-0.715243	0.00234844		Cebpzos	2.91107	0.591552	0.0630161		Wasf2	5.84341	0.979177	1.62801e-07
Sptan1	1.12311	0.110222	0.447606		Cela3b	0.604383	1.69606	0.7485		Ssx2ip	0.642401	0.400973	0.74063		Ss18	3.24784	0.464752	0.0202514		Lsm5	-4.25434	-0.559607	0.000393761		S1pr1	3.80528	0.562041	0.00256076		Inpp5d	6.47217	0.895327	2.83572e-09		Zcchc18	3.82874	0.787974	0.0023452		Klf10	2.90843	1.09555	0.0635029		Serbp1	5.84174	0.61594	1.56461e-07
Gm28347	1.12202	1.17423	0.448242		Gm28959	0.604383	1.69606	0.7485		Bmf	0.641822	0.43012	0.740817		Ctbp1	3.24783	0.350988	0.0202514		Ndufa10	-4.25407	-0.599736	0.000394132		Atp6v1f	-3.80497	-0.360949	0.00256161		Prdx5	6.4718	0.659303	2.82899e-09		Smpdl3a	3.82628	0.356835	0.00235969		Glb1	2.90819	0.754903	0.0634922		Timm13	5.84026	0.711526	1.58256e-07
Cox16	1.11916	0.189442	0.449953		Adgrg5	0.604383	1.69606	0.7485		Hs1bp3	0.641499	0.245008	0.740817		Selo	3.24299	0.62399	0.0205898		Elf4	-4.25289	-0.829788	0.000395986		Trappc3	-3.80213	-0.720275	0.00259299		2700060E02Rik	6.47179	0.57817	2.7061e-09		Gimap1	3.82418	0.269477	0.00237539		Dctd	-2.90768	-3.72215	0.0643724		Agpat4	5.84015	2.02993	1.93303e-07
Cenpt	1.11623	0.305832	0.451663		2310040G07Rik	0.604383	1.69606	0.7485		Platr27	0.640348	0.542329	0.740817		Zfp281	3.24022	0.440348	0.0207482		Hdgf	-4.2502	-0.607237	0.000399428		Abi3	-3.79931	-0.999722	0.00263716		Gpr68	6.47138	1.19658	2.85208e-09		Mrpl20	3.82111	0.493981	0.00240451		Fmnl1	2.90407	0.341886	0.0641074		Ccdc109b	5.83965	1.90338	1.90735e-07
Cdc42ep4	1.11581	0.493731	0.451877		Gm3839	0.604383	1.69606	0.7485		Camkmt	0.639779	0.448979	0.740817		Sys1	3.2373	0.297037	0.0209326		Vapa	-4.25005	-0.497058	0.000398195		Exoc6	-3.79824	-1.45501	0.00265301		Nmb	6.4695	1.06652	2.83505e-09		Mtdh	3.82038	0.420227	0.00241313		Lsm7	-2.90309	-0.857671	0.0643186		Ndufa7	5.8352	0.639421	1.67499e-07
Angptl1	1.11447	1.50438	0.452311		Rnft2	0.604383	1.69606	0.7485		4930412M03Rik	0.639585	0.600045	0.740817		Zfp1	3.23601	0.49983	0.0210196		Dnm2	-4.24964	-0.721961	0.000399206		Rab37	-3.7943	-0.612413	0.00266769		Mrpl54	6.46946	0.882901	2.83637e-09		Thumpd3	3.81218	0.603012	0.00248864		Ethe1	2.90272	0.707228	0.0643186		Hist1h1e	5.82906	1.43307	1.90735e-07
Gm10644	1.11447	1.50438	0.452311		Olfr1444	0.604383	1.69606	0.7485		Camk2n2	0.639585	0.600045	0.740817		Fam114a2	3.23374	0.460333	0.0211694		Ndufa9	-4.24876	-0.686245	0.000399906		Commd8	-3.79345	-0.692196	0.00267211		Drap1	6.46646	0.640169	2.83505e-09		Snx1	3.80959	0.677546	0.00251512		Hscb	2.9026	0.624496	0.0643186		Pold4	5.8237	0.961697	1.8041e-07
Efna2	1.11447	1.50438	0.452311		Acvr2b	0.604383	1.69606	0.7485		Gm12454	0.639585	0.600045	0.740817		Hjurp	3.23145	0.445187	0.0213011		Ubc	-4.24866	-0.305844	0.000399602		Exosc8	-3.79343	-0.454285	0.00267491		Trim26	6.46553	0.908981	2.91449e-09		Med14	3.80901	1.02706	0.00253356		Stx5a	2.90138	0.469568	0.0643724		Cmc1	5.82283	1.04735	1.85846e-07
Wfikkn1	1.11447	1.50438	0.452311		Tctex1d1	0.604383	1.69606	0.7485		Trav12-1	0.639115	0.947968	0.740817		1700017B05Rik	-3.23101	-0.991378	0.0213763		Sorcs2	-4.24859	-25.3115	0.000428139		Slc22a2	-3.79309	-25.4313	0.00279811		Ube2l3	6.46183	0.652934	2.90523e-09		Ndufa2	3.80714	0.324428	0.00253342		Nfatc2	2.89771	0.553612	0.0650207		Rnf125	5.82198	1.86335	2.09855e-07
Henmt1	1.11447	1.50438	0.452311		Mpp4	0.604383	1.69606	0.7485		RP23-6I17.1	0.636656	0.126443	0.740817		Elmo1	3.22953	0.422461	0.0214089		Pik3r5	-4.24692	-2.00699	0.000411026		Wbp4	-3.78592	-0.726102	0.00275143		Pik3r1	6.46133	0.759494	2.95227e-09		Ilf3	3.8071	0.850866	0.00253356		Lrpprc	-2.89731	-1.05963	0.0652463		Slc36a3os	5.82166	2.90252	2.38153e-07
Lrtm2	1.11447	1.50438	0.452311		Gm28402	0.604383	1.69606	0.7485		Gzf1	0.636071	0.185444	0.740817		Slc25a11	3.22871	0.350135	0.0214289		Itga4	-4.24662	-0.542884	0.000406071		Uqcrc1	-3.78583	-0.497956	0.00275227		Mau2	6.46031	1.0925	3.07089e-09		A430078G23Rik	-3.80689	-1.1746	0.00253482		Aldh3a2	2.89638	0.898805	0.0653045		Slc25a11	5.82031	0.922135	1.84609e-07
Shisa4	1.11447	1.50438	0.452311		Gm20708	0.604383	1.69606	0.7485		1700029J07Rik	0.634977	0.346704	0.740817		Btf3l4	3.22838	0.443382	0.0214431		Mettl20	-4.24474	-1.11678	0.000409157		Ifi27l2a	-3.78577	-0.503532	0.00276983		Tspan3	6.45763	0.923827	2.98429e-09		Mpc1	3.80658	0.514394	0.00253356		Cnep1r1	2.89382	0.772306	0.0656777		Lpxn	5.81789	0.936721	1.87582e-07
Gm2449	1.11447	1.50438	0.452311		Gm31026	0.604383	1.69606	0.7485		Zfp28	0.634575	0.286384	0.740817		Ppp1r9b	3.2268	0.432614	0.0215449		Fam46a	-4.24334	-1.17403	0.000416756		Mdh1	-3.78391	-0.391982	0.00277307		Arrb2	6.45659	0.912125	3.08327e-09		Foxp3	3.80594	0.536287	0.00253356		Nob1	-2.89344	-0.830541	0.0657308		Ankrd13a	5.81512	1.33179	1.98485e-07
4632411P08Rik	1.11447	1.50438	0.452311		Timp1	0.604383	1.69606	0.7485		Gm16150	0.633305	1.82244	0.740817		Dnajc5	3.22462	0.406197	0.0216682		Pura	-4.24032	-0.412932	0.000411788		Hnrnph1	-3.78267	-0.49266	0.00277312		Dnase2a	6.45418	1.20948	3.14513e-09		Fam216a	3.80574	1.10849	0.0025549		Gm8730	-2.89126	-0.433379	0.0660089		Mapk1	5.81182	0.946995	1.90735e-07
2010107G12Rik	1.11447	1.50438	0.452311		Gm5106	0.604383	1.69606	0.7485		Gsto2	0.633305	1.82244	0.740817		Gnai2	3.22425	0.209618	0.0216682		Gimap4	-4.23861	-0.33433	0.000415293		Pura	-3.78241	-0.361129	0.00277348		Rab8b	6.45231	0.949398	3.18209e-09		Tnfrsf8	3.80522	1.85669	0.0025804		Cep19	2.88836	0.688307	0.0665718		Copa	5.80686	0.956311	1.9259e-07
Wdr75	1.11342	0.167142	0.452905		Gm26635	0.604383	1.69606	0.7485		Gm26787	0.633305	1.82244	0.740817		Aamdc	3.22199	0.520408	0.0218247		Ndufs2	-4.23838	-0.535325	0.000415315		Ndufv1	-3.78196	-0.638388	0.00277489		Ywhah	6.4492	0.692588	3.12655e-09		Pdk1	-3.80368	-0.735918	0.0025565		Camk2b	2.88811	0.996129	0.0666278		Fam53b	5.8015	0.757794	1.98485e-07
B4galt7	1.1132	0.19159	0.453015		Aloxe3	0.604383	1.69606	0.7485		Mmp24	0.633305	1.82244	0.740817		Hnrnpc	3.2188	0.291064	0.0220439		Ndufc2	-4.23438	-0.49183	0.000423825		Nfkbiz	-3.78176	-0.840763	0.00279448		Ccng1	6.44759	1.07705	3.33169e-09		Gpr146	-3.80328	-1.5559	0.00258983		Pkn1	2.88685	0.425685	0.0667063		Ddx24	5.80144	0.715202	1.96858e-07
Gm42957	1.11242	0.908768	0.453454		Fblim1	0.604383	1.69606	0.7485		Gm26596	0.633305	1.82244	0.740817		Lrig1	3.21814	0.547829	0.0220816		Lsm6	-4.23376	-0.534003	0.000424412		Eva1b	-3.78154	-0.541818	0.00277489		Pcbp1	6.44756	0.653191	3.11229e-09		Tspan31	3.80067	0.773689	0.0025804		Ifrd2	-2.88631	-1.45766	0.0670875		Vbp1	5.79954	1.06679	2.1227e-07
Thy1	1.11138	0.0681192	0.454066		Prkcg	0.604383	1.69606	0.7485		Gm7628	0.633305	1.82244	0.740817		Cdc42se1	3.21449	0.35335	0.0223301		Lta	-4.23373	-1.61533	0.000429445		Hnrnpu	-3.7788	-0.431349	0.00280419		Pan3	6.44331	0.963168	3.32071e-09		Rtfdc1	3.79907	0.530562	0.00258863		6330403K07Rik	2.88617	0.865118	0.0668937		Arhgap15	5.79859	0.704225	2.04239e-07
Zbtb11	1.10858	0.143099	0.455777		Ctrb1	0.604383	1.69606	0.7485		Neurl1b	0.633305	1.82244	0.740817		Mfsd1	3.21384	0.667647	0.0223636		Eif5b	-4.23346	-0.557697	0.000425389		Ogfr	-3.77878	-0.653704	0.00280291		Usp9x	6.44245	1.01277	3.34594e-09		Mdh2	3.79671	0.383761	0.00261087		Tbc1d10c	2.88443	0.267222	0.0670711		Timm8b	5.79661	1.08093	2.09855e-07
Mtap	1.10769	0.147911	0.456238		Gm16337	0.604383	1.69606	0.7485		Htr1b	0.633305	1.82244	0.740817		Pdcd10	3.21156	0.291192	0.0224845		Dnajc19	-4.23191	-0.688245	0.000425789		Rad17	-3.77507	-1.0435	0.00284873		Zc3h13	6.44118	1.00353	3.39791e-09		Cnbp	3.7961	0.318341	0.00261087		Kcnk7	2.88384	2.10678	0.0675301		Cdkn1b	5.7941	0.783592	2.0988e-07
Nsun5	1.10717	0.20691	0.456527		Bricd5	0.604383	1.69606	0.7485		Lct	0.633305	1.82244	0.740817		Dennd1b	3.2114	0.464925	0.0224845		Daxx	-4.23119	-0.940822	0.000429353		Syngr2	-3.77398	-0.626294	0.00285159		Btg2	6.43972	0.614662	3.3137e-09		Rrs1	3.7952	0.864996	0.00262278		Shmt2	-2.88289	-1.08599	0.0675301		Lamtor3	5.79119	1.10879	2.10023e-07
Pik3c2b	1.10671	0.679465	0.456774		Fbxo2	0.604383	1.69606	0.7485		Gm1720	0.633305	1.82244	0.740817		Sdha	3.21118	0.288953	0.0224845		Ogt	-4.23085	-0.381942	0.000426339		Glrx2	-3.77248	-0.708331	0.00285853		Nucks1	6.43881	0.729202	3.29872e-09		Mpdu1	3.79409	0.795633	0.00263487		Smc4	-2.88245	-0.272123	0.0674095		Vrk3	5.79088	1.14204	2.26451e-07
Mst1	1.10549	0.719391	0.457435		4921536K21Rik	0.604383	1.69606	0.7485		Gm684	0.633305	1.82244	0.740817		Cbl	3.21058	0.337427	0.0225163		Nup210	-4.22972	-0.757989	0.000428863		Mff	-3.77213	-0.574362	0.00285492		Ikbkb	6.43835	0.780021	3.38704e-09		Ptbp1	3.79208	0.508445	0.00264173		Slc36a3os	2.88126	1.30005	0.0677129		Cast	5.78358	1.11011	2.26815e-07
Gm10263	1.10206	0.305832	0.459565		Magix	0.604383	1.69606	0.7485		Gm10300	0.633305	1.82244	0.740817		Gpr183	-3.21028	-0.670783	0.0225163		Slc44a2	-4.22799	-0.752743	0.000429445		Hnrnpdl	-3.76985	-0.484132	0.0028888		Ubap2l	6.43716	0.746951	3.37538e-09		Nr2f6	3.78982	1.35191	0.0026939		Ap2a1	2.8797	0.616253	0.0677482		Nebl	5.78242	3.97159	3.11982e-07
Cdk19	1.09996	0.130582	0.46075		Gm12689	0.604383	1.69606	0.7485		Baiap2l1	0.633305	1.82244	0.740817		Zbtb43	3.21022	0.720204	0.0225163		Chtop	-4.22775	-0.635822	0.000429445		Arpc5	-3.76806	-0.376147	0.00290627		Gpr174	6.4369	0.881213	3.37858e-09		Gnpnat1	3.78725	0.738835	0.00270037		Rangrf	-2.87888	-0.667374	0.0679133		Rnpep	5.78216	1.1746	2.29701e-07
Ebf1	1.09898	1.82631	0.4608		Gm19582	0.604383	1.69606	0.7485		Gm12148	0.633305	1.82244	0.740817		Herc6	3.20911	0.547471	0.0225646		Kif1b	-4.22583	-0.900789	0.000435555		Abi1	-3.76709	-0.62873	0.00290627		Eif2ak2	6.43674	1.27454	3.47829e-09		Rpn2	3.78474	0.467721	0.00271777		Dctn6	2.87727	0.453015	0.0680654		Akirin1	5.77812	1.09012	2.34184e-07
Gm16982	1.09898	1.82631	0.4608		Gm20496	0.604383	1.69606	0.7485		RP23-172P1.2	0.633305	1.82244	0.740817		Nt5dc1	3.20868	0.516742	0.0225803		Parp3	-4.22071	-0.899683	0.000444636		Hif1a	-3.76704	-0.57535	0.00292912		Baz1a	6.43601	0.931674	3.42295e-09		Gbp2	-3.78394	-0.893338	0.0027571		Zpr1	-2.87703	-0.64859	0.0680735		Ppp1r35	5.77557	1.04741	2.33097e-07
Pla2g4b	1.09898	1.82631	0.4608		Gm17024	0.604383	1.69606	0.7485		Ces2d-ps	0.633305	1.82244	0.740817		C1galt1	3.20784	0.534345	0.0226391		Sike1	-4.21961	-0.877592	0.000444636		Kcnq1ot1	-3.76449	-0.538268	0.00292912		Zbtb4	6.43206	1.10956	3.62043e-09		Zc3h15	3.78347	0.435596	0.00272115		Cxx1a	2.87672	0.782826	0.0680735		Arhgap4	5.77274	0.991341	2.39777e-07
Cyp2d26	1.09898	1.82631	0.4608		Fer	0.604383	1.69606	0.7485		Gm15511	0.633305	1.82244	0.740817		Cic	3.20696	0.53636	0.0226698		Yy1	-4.21926	-0.51109	0.000444393		Adss	-3.76281	-0.538002	0.00295006		Ppp2r2a	6.42755	0.857978	3.56554e-09		Srrm2	3.78322	0.281281	0.00272115		Got1	2.87665	0.562548	0.0680735		Tmco1	5.768	1.08895	2.45859e-07
Gm11455	1.09898	1.82631	0.4608		RP23-36D15.6	0.602815	0.696061	0.749205		Phyhd1	0.633305	1.82244	0.740817		Slc14a1	3.20688	0.680112	0.0226698		Krit1	-4.21754	-0.475483	0.000446042		Cox17	-3.76246	-0.425941	0.00295006		Etnk1	6.42498	0.816836	3.63273e-09		Prdx2	3.78263	0.387883	0.00272851		Nxnl2	2.87632	4.86732	0.0691951		Ndufc1	5.76681	0.846847	2.3443e-07
Fap	1.09898	1.82631	0.4608		Pcna-ps2	0.602815	0.696061	0.749205		Igkv2-107	0.633305	1.82244	0.740817		Fyn	3.20584	0.320185	0.0227431		Gcn1l1	-4.21454	-0.921282	0.000454555		Ube2n	-3.76194	-0.467174	0.00295472		Gsk3b	6.42443	0.802574	3.70947e-09		Rbmxl1	3.7823	0.571125	0.00273226		Il9r	2.87536	1.47934	0.068564		Dock8	5.7653	0.904759	2.41496e-07
4933427G17Rik	1.09898	1.82631	0.4608		Etv1	0.602815	0.696061	0.749205		Naalad2	0.633305	1.82244	0.740817		Xpr1	3.20264	0.47775	0.0229298		Ago2	-4.21345	-0.654947	0.000454555		Tbcb	-3.76148	-0.590211	0.00295472		Nufip2	6.42388	0.740732	3.62821e-09		Ruvbl1	3.78191	0.695271	0.00273672		Fam60a	-2.87499	-0.943858	0.0684427		Hcst	5.75819	0.627142	2.48558e-07
Gm20661	1.09898	1.82631	0.4608		Bsn	0.602815	0.696061	0.749205		Gm43253	0.633305	1.82244	0.740817		Smarcd1	3.20094	0.601933	0.0230549		Tma7	-4.20994	-0.309656	0.000461489		Srsf3	-3.75946	-0.316474	0.00298738		Pde2a	6.42286	1.13694	3.75882e-09		Ddt	3.78103	0.52973	0.00273773		Aup1	2.87211	0.385081	0.0687257		Gpbp1l1	5.75773	1.00698	2.54599e-07
Gm36975	1.09898	1.82631	0.4608		Taco1os	0.602815	0.696061	0.749205		Gnat2	0.633305	1.82244	0.740817		Hist1h2bc	3.20021	0.861539	0.0231199		Irf1	-4.20732	-0.548777	0.000466506		Atp6v0b	-3.75695	-0.503267	0.00299783		Ankhd1	6.42117	1.02142	3.75404e-09		Pnp	3.78095	0.584565	0.00273866		Cdk6	2.86988	0.631277	0.0691476		Tmem165	5.75764	1.00978	2.53912e-07
Trim34b	1.09898	1.82631	0.4608		Gm11175	0.602815	0.696061	0.749205		Cx3cl1	0.633305	1.82244	0.740817		Stk17b	3.19812	0.305362	0.0232625		Smim14	-4.20553	-0.604939	0.000467429		Arpc4	-3.75631	-0.408674	0.00300568		Eif4g1	6.4197	0.945371	3.82887e-09		Myh9	3.77849	0.373659	0.0027582		Incenp	2.8692	0.937169	0.0692207		Psmc3	5.75761	0.843915	2.5411e-07
Col10a1	1.09898	1.82631	0.4608		Pard3b	0.601572	0.821592	0.749418		9530052E02Rik	0.633305	1.82244	0.740817		Pag1	3.19697	0.539408	0.0233021		Naa38	-4.20314	-0.684091	0.000471898		Reep5	-3.75537	-0.443651	0.00302612		Ahcyl2	6.41778	0.856243	3.85504e-09		Gm26740	-3.77589	-0.40306	0.00278089		Thumpd1	-2.86893	-0.6653	0.0692207		Snrpb	5.75612	0.63417	2.44104e-07
Cox10	1.09728	0.184537	0.46174		Sgtb	0.601572	0.821592	0.749418		Gpd1	0.633305	1.82244	0.740817		Pcnp	3.19528	0.338811	0.0233939		Foxk1	-4.20263	-1.47511	0.00048085		Foxp4	-3.75118	-0.946398	0.00307143		Smc3	6.41739	0.851626	3.83204e-09		Derl2	3.77559	0.580726	0.00278841		St13	-2.86861	-0.334471	0.0692207		Prkd2	5.75345	0.950063	2.5976e-07
Tubd1	1.09699	0.376503	0.461831		RP23-205F19.4	0.601572	0.821592	0.749418		Gm16350	0.633305	1.82244	0.740817		Supt20	3.19133	0.358644	0.0237071		Pfdn1	-4.19829	-0.661085	0.00048085		Zfp281	-3.75069	-0.675735	0.00307143		Chst2	6.41175	1.40353	4.08531e-09		Wbscr22	3.77454	0.7247	0.00279968		Cnn3	-2.86855	-24.4344	0.0703995		Ehbp1l1	5.75147	1.6821	2.91902e-07
Ckap4	1.09669	1.17423	0.461963		Zfp108	0.601572	0.821592	0.749418		Ppp1r3d	0.633305	1.82244	0.740817		Sh2d3c	3.1832	0.52657	0.0243459		Pde2a	-4.19615	-0.965139	0.000488125		Adck5	-3.74873	-0.974731	0.00309678		Mllt6	6.40335	0.979853	4.23609e-09		Mak16	3.76871	0.660999	0.00285361		Glcci1	2.86829	0.795622	0.0692207		Mdp1	5.74991	0.944775	2.66502e-07
Zbtb8a	1.09615	0.258621	0.462192		Vdac3-ps1	0.601572	0.821592	0.749418		Kcnrg	0.633305	1.82244	0.740817		Ksr2	3.18226	1.09671	0.0244377		Ptp4a3	-4.19514	-0.599208	0.000488666		Macrod1	-3.74754	-2.02528	0.00315112		Spcs1	6.40122	0.689678	4.10528e-09		Ptpn11	3.76526	0.771322	0.00289544		Hmgcl	2.86739	0.634799	0.0693226		Lsm4	5.7496	0.786188	2.68601e-07
B130046B21Rik	1.09587	0.645734	0.462309		Skida1	0.601572	0.821592	0.749418		Cdkl1	0.633305	1.82244	0.740817		Kmt2c	3.17882	0.44322	0.0246679		Hif1a	4.19315	0.63339	0.000493688		Adrbk1	-3.74677	-0.419062	0.00310375		Kcmf1	6.40007	0.907684	4.23194e-09		C1d	3.76197	0.572217	0.00292711		Mcur1	2.86504	0.725533	0.0697647		Polr2j	5.74576	0.802128	2.64414e-07
Rapgef3	1.09461	1.0487	0.463099		Spag4	0.601572	0.821592	0.749418		Gm16156	0.633305	1.82244	0.740817		Safb	3.17836	0.368338	0.0246777		Ptges3	-4.19278	-0.500032	0.000493688		Ccr2	3.7431	1.39393	0.00315397		Plekhj1	6.39922	0.657808	4.2155e-09		Ywhab	3.75882	0.391305	0.00296833		Dnajb1	-2.86388	-0.469089	0.0699875		Snx17	5.74538	0.966408	2.68601e-07
Hmbox1	1.0944	0.175695	0.463196		Arl6ip1	0.600135	0.0322005	0.749493		Tex26	0.633305	1.82244	0.740817		Immp1l	3.17712	0.429828	0.0247488		Xrn2	-4.1916	-0.61107	0.000495369		Snhg12	-3.74112	-0.697418	0.00316629		Tsn	6.39542	0.654249	4.23024e-09		Rcc2	3.75715	0.589015	0.0029768		Gm13012	2.86286	0.784976	0.0701109		Frmd8	5.74207	0.889795	2.7096e-07
Mib2	1.09125	0.273765	0.46539		1700001J03Rik	0.5975	1.1111	0.749493		Fsbp	0.633305	1.82244	0.740817		Zbtb1	3.17578	0.407473	0.0248583		Nras	-4.1902	-0.827278	0.000498087		2310015A10Rik	-3.74061	-1.6315	0.00323195		Sin3b	6.38965	0.724065	4.44282e-09		Yrdc	3.75663	0.708946	0.0029768		Prpf18	2.86143	0.590007	0.0703337		Morf4l1	5.74172	0.608027	2.68601e-07
Gm13205	1.08983	0.38005	0.46615		Trav9-1	0.59573	0.69606	0.749493		Gm17024	0.633305	1.82244	0.740817		Taok1	3.17372	0.528623	0.0250211		Mllt3	-4.18868	-0.645913	0.000500495		Tmem230	-3.7404	-0.840438	0.00316893		Amfr	6.38384	1.07958	4.79784e-09		Ppa1	3.75602	0.674709	0.0029768		Rer1	2.85891	0.281442	0.070676		Etfb	5.74122	1.04776	2.84554e-07
Cfl1	1.08917	0.0390883	0.466517		AA474408	0.594261	0.236629	0.749493		Gm28988	0.633305	1.82244	0.740817		Upf2	3.17319	0.435158	0.0250211		Ptprc	-4.18669	-0.290074	0.000502981		Stk19	-3.73781	-0.971199	0.00321221		Pgs1	6.37939	0.815705	4.758e-09		Pex11a	3.75557	2.1658	0.0030436		Mtap	-2.85675	-0.879959	0.0711963		Ssb	5.73905	0.696558	2.7119e-07
Mitd1	1.08788	0.0979405	0.467309		Sh3d19	0.593451	0.39838	0.749493		Morn3	0.633305	1.82244	0.740817		Slc22a5	3.1714	1.14344	0.0251991		Lbr	-4.18306	-0.626161	0.000510078		Atp1b1	-3.73662	-1.75645	0.00327083		Ppia	6.37221	0.416656	4.79314e-09		Rcn1	-3.75423	-0.874	0.0030097		Glod4	2.85585	0.5449	0.0711963		2020-03-02	5.73442	0.804845	2.87967e-07
B3galt4	1.08726	0.169959	0.46767		2210011C24Rik	0.590899	0.503415	0.749493		Gm10941	0.633305	1.82244	0.740817		Lrmp	3.16928	0.441713	0.025294		Top1	-4.18256	-0.425858	0.000510078		Ly6a	3.73271	0.48011	0.00324447		Far1	6.372	1.21596	5.19727e-09		2610524H06Rik	3.75291	1.00706	0.00303374		Rap1a	2.85581	0.270872	0.0711963		Ube2j2	5.73427	0.999826	2.84707e-07
Ogfrl1	1.08515	0.476721	0.469014		Zfp599	0.59032	0.246027	0.749493		Rxfp1	0.633305	1.82244	0.740817		Rbm25	3.16909	0.244214	0.025294		Churc1	-4.18228	-0.52482	0.000510078		Strap	-3.73078	-0.561906	0.00328334		Itpr2	6.36512	0.807953	5.32802e-09		Tsr1	3.75168	1.14015	0.00304761		Pno1	-2.85554	-1.13719	0.071475		Lgmn	5.73366	2.90049	3.47442e-07
Ak6	1.08423	0.165108	0.469543		Hectd2	0.590101	0.320193	0.749493		Cyp27b1	0.633305	1.82244	0.740817		Strn3	3.16881	0.508676	0.0253057		Kdm1a	-4.18214	-0.745518	0.000511669		Gpsm3	-3.72764	-0.388846	0.00330736		Fbxw2	6.362	0.750773	5.19727e-09		1810043H04Rik	3.74981	0.52106	0.00304568		Samd1	-2.85434	-0.90939	0.0715004		Ewsr1	5.73077	0.80019	2.87345e-07
Man2c1	1.08168	0.192763	0.471253		Nrg4	0.589641	0.39838	0.749493		Gm20680	0.633305	1.82244	0.740817		Itgae	-3.16832	-0.492746	0.0253356		Ftsj3	-4.18176	-1.10122	0.000513642		Dusp11	-3.72685	-0.426369	0.00331631		Usf2	6.36199	0.82617	5.36058e-09		Polr2f	3.74955	0.460868	0.0030436		Polr2g	2.85288	0.332902	0.0715863		Prpf40a	5.72909	0.889368	2.9364e-07
D630008O14Rik	1.08017	0.919416	0.47205		Neil2	0.589183	0.374132	0.749493		Sort1	0.633305	1.82244	0.740817		Fabp5	-3.16799	-0.934564	0.0255764		Fam60a	-4.18155	-1.33158	0.00051572		Ccni	-3.72521	-0.615885	0.0033363		Ppil2	6.36165	0.831733	5.35378e-09		Snx9	3.74801	1.52535	0.00310223		Arhgdib	2.84996	0.205184	0.0721713		Lman2	5.72816	0.80815	2.87098e-07
Gm11491	1.08017	0.919416	0.47205		Hist1h2ab	0.588889	0.696061	0.749493		Prss39	0.633305	1.82244	0.740817		Lasp1	3.16345	0.389232	0.0256718		Irf9	-4.18127	-0.687115	0.000512223		Tbl1x	-3.72103	-0.809397	0.00338789		Surf4	6.35562	0.970745	5.48209e-09		Nol7	3.74677	0.363479	0.00306808		Cul3	2.84804	0.384642	0.0725456		Hnrnpa1	5.72705	0.893006	2.9364e-07
Bysl	1.07817	0.209163	0.473323		Zrsr1	0.587531	0.171315	0.749493		Saxo2	0.633305	1.82244	0.740817		Tmem175	3.1606	0.781643	0.0259339		Xaf1	-4.18067	-0.88732	0.000513642		Tox	-3.71923	-0.631175	0.00342452		Hint1	6.35335	0.52447	5.35378e-09		Il27ra	3.74498	0.498123	0.00309846		Snrpf	-2.8478	-0.274821	0.0727361		Puf60	5.72366	0.855734	2.97413e-07
Mphosph9	1.07789	0.209211	0.473453		Nim1k	0.585364	0.549219	0.749493		Kdr	0.633305	1.82244	0.740817		Arhgap27os3	3.15898	0.724189	0.0259898		Fkbp5	4.18047	0.826954	0.000513642		Rcan3	-3.7186	-1.4093	0.00343383		Setd3	6.35211	0.954816	5.65614e-09		Rnf19a	3.74331	1.0056	0.00312021		Slc7a1	-2.84737	-1.2095	0.0727361		Rpa1	5.72353	1.19193	3.0823e-07
Kat2b	1.07675	0.136787	0.474166		Cntd1	0.585018	0.78917	0.749493		Fer	0.633305	1.82244	0.740817		Rasgrp2	3.15891	0.463834	0.0259898		Gars	-4.17711	-0.98655	0.000522938		Tpi1	-3.71605	-0.845449	0.0034892		Aak1	6.3516	0.899815	5.66279e-09		Actr2	3.74085	0.397316	0.0031268		Rtfdc1	2.84708	0.429649	0.0727207		Lgals3	5.72222	5.82248	4.48273e-07
A430110L20Rik	1.07553	0.569966	0.47484		Zfp719	0.584233	0.172498	0.749493		Gm4792	0.633305	1.82244	0.740817		Tlr1	3.15889	0.611483	0.0259898		Gramd4	-4.17347	-1.20243	0.00052969		Mrps36	-3.71581	-0.605969	0.00344857		Pcf11	6.34857	1.00198	5.78234e-09		Pole4	3.73943	0.480236	0.00314395		Dnaja3	-2.84703	-0.963887	0.0727361		Ctcf	5.72097	0.75369	2.98381e-07
Maff	1.07553	0.569966	0.47484		Aldh1a2	0.582695	0.821592	0.749493		BC048644	0.633305	1.82244	0.740817		Zfp106	3.15795	0.499239	0.026043		Nod1	-4.17052	-1.88392	0.000543968		Notch1	-3.71398	-0.620353	0.00347263		Mecp2	6.34786	0.889003	5.79311e-09		Wsb1	3.73861	0.685017	0.0031505		Rasa3	-2.84387	-0.761104	0.0732582		Nck1	5.72035	1.12072	3.0823e-07
Epb41l2	1.07291	0.17216	0.475864		Epn2	0.582695	0.821592	0.749493		Gm11802	0.633305	1.82244	0.740817		Wipf1	3.15514	0.344974	0.0262472		Abi3	-4.167	-1.15609	0.000542909		Pdcl3	-3.71104	-0.646013	0.00350117		Tmem30a	6.34723	0.907987	5.86711e-09		Nt5c	3.73756	0.363565	0.0031588		Rnf215	2.84252	0.741513	0.0733838		0610011F06Rik	5.71133	1.03535	3.16368e-07
Pim3	1.07222	0.175335	0.475969		4930480K23Rik	0.581159	0.29613	0.749493		Gm19582	0.633305	1.82244	0.740817		Akna	3.15502	0.309532	0.0262472		Fdps	-4.16575	-1.21608	0.000553116		Fam195b	-3.71052	-0.585918	0.00350186		Arrdc1	6.34709	1.06027	6.009e-09		Tmem71	-3.7373	-0.902231	0.00318166		Gimap4	2.84247	0.232483	0.0733542		Dnm2	5.70786	1.00977	3.23913e-07
Nfe2l2	1.07183	0.15048	0.475969		Carns1	0.579253	0.171315	0.749493		RP24-177G14.2	0.633305	1.82244	0.740817		Smim19	3.15329	0.471647	0.0263738		Larp4	-4.16553	-1.20467	0.000550776		Eif1ax	-3.71048	-0.566796	0.00350525		Atp5f1	6.34036	0.528689	5.798e-09		Slc17a9	-3.73546	-0.948548	0.00320134		Pbxip1	2.84033	0.412305	0.0737141		Med30	5.70521	0.976056	3.36286e-07
Med21	1.06999	0.0919787	0.475969		Lst1	0.574775	0.172498	0.749493		Acvr2b	0.633305	1.82244	0.740817		Atraid	3.15294	0.464213	0.0263738		Vsig10	4.16512	1.39314	0.000549148		Il1rl1	3.71041	1.55961	0.00353151		Vsir	6.33977	0.828585	5.98973e-09		Glcci1	3.7312	0.979746	0.00324541		Gimap3	2.83323	0.202392	0.0752693		Ppp2r5c	5.70087	1.05649	3.43148e-07
Timm10	1.06815	0.136161	0.475969		Efhc2	0.574433	0.78917	0.749493		C030014I23Rik	0.633305	1.82244	0.740817		Mtf2	3.15269	0.479477	0.0263776		Polr2a	-4.15913	-0.624189	0.000556557		Tgfbr2	-3.70684	-0.633912	0.00354035		Rora	6.33903	1.25621	6.12413e-09		Rest	3.72696	0.558457	0.0032852		Vsig10	2.82776	1.04846	0.0766311		Arid4b	5.7005	0.945515	3.43921e-07
Cyp2r1	1.06545	0.762176	0.475969		Jag1	0.574269	0.651666	0.749493		Gpat2	0.633305	1.82244	0.740817		Ccar1	3.1507	0.420204	0.0265104		Phb	-4.15024	-0.910782	0.000581014		Snw1	-3.70578	-0.444395	0.00354845		Ide	6.33895	1.22209	6.17134e-09		Lamc1	3.72599	1.01168	0.00329913		Dennd1c	2.82678	0.410087	0.0766644		Ttc39c	5.6998	1.5464	3.52667e-07
BC068281	1.06445	0.283163	0.475969		Kantr	0.572603	0.227911	0.749493		Cux2	0.633305	1.82244	0.740817		Rock1	3.15053	0.28319	0.0265104		Qars	-4.1474	-0.799026	0.000584459		Cdk2ap1	-3.6999	-0.615477	0.00363962		Zfp706	6.33865	0.603471	5.92005e-09		Tmc6	3.72548	0.619752	0.00329913		Notch1	2.82554	0.442178	0.0768694		Dbnl	5.69896	0.794635	3.36286e-07
Noa1	1.06425	0.161233	0.475969		Kbtbd8	0.566368	0.281023	0.749493		Gm26711	0.633305	1.82244	0.740817		Myb	3.14848	1.57917	0.0268019		Uba2	-4.14197	-0.6144	0.000596785		Psenen	-3.69864	-0.331609	0.0036493		Ppp4c	6.33399	0.731024	6.17876e-09		Gem	3.7253	1.63387	0.00332635		Hacd3	2.82504	0.607505	0.0768694		Bud31	5.69741	1.06813	3.46857e-07
Rgl2	1.06243	0.141808	0.475969		C1qtnf6	0.56593	0.160007	0.749493		Gm20708	0.633305	1.82244	0.740817		AI314180	3.14415	0.517808	0.0270606		Psma7	-4.14149	-0.372153	0.000603368		Tomm5	-3.69561	-0.485603	0.00370042		0610007P14Rik	6.33361	0.860136	6.18763e-09		Tesc	-3.72504	-0.652697	0.0033005		Chmp2a	2.82495	0.28357	0.0768694		Prrc2c	5.69603	0.638159	3.39322e-07
Trav14-2	1.05948	0.77568	0.477839		Tecpr2	0.564309	0.29613	0.749493		Gm26895	0.633305	1.82244	0.740817		Cwf19l2	3.14357	0.561657	0.0270812		Cndp2	-4.14027	-0.99531	0.000603368		Mrps17	-3.69359	-0.64846	0.00371278		Uqcr11	6.33181	0.599944	6.12413e-09		Gm16894	3.71481	2.00173	0.00349011		Sfxn1	-2.82424	-0.654896	0.0771339		Mcl1	5.69213	0.551117	3.43148e-07
Gid4	1.05792	0.172378	0.478856		Lrrc51	0.564236	0.317549	0.749493		Gm10390	0.633305	1.82244	0.740817		Scaper	3.14197	0.682072	0.0272175		Nrip1	-4.13993	-0.587205	0.000603368		Vapa	-3.69228	-0.42467	0.00372237		Sh3bp1	6.33127	0.8132	6.22112e-09		Sdf2	3.71136	0.558341	0.00347396		Rab14	2.82238	0.305159	0.0772821		Mgst2	5.69181	0.928645	3.66646e-07
Toporsos	1.05728	0.123785	0.479043		Piwil2	0.562397	1.37413	0.749493		Nutf2-ps1	0.633305	1.82244	0.740817		Yod1	3.14123	0.843171	0.0272362		Yeats4	-4.13853	-0.697935	0.000603368		Hpcal1	-3.69198	-0.714944	0.00373088		Ctnnb1	6.32987	0.76518	6.24759e-09		Txnrd2	3.71051	0.936898	0.00349225		Rac1	2.82211	0.262629	0.0772821		Mrpl27	5.68776	1.43488	3.91636e-07
Aacs	1.05505	0.220033	0.480329		Foxq1	0.562397	1.37413	0.749493		Gm28959	0.633305	1.82244	0.740817		Sec61g	3.14069	0.213937	0.0272362		Baiap3	4.1373	1.42646	0.00061146		Fus	-3.69191	-0.374139	0.00372237		Aff4	6.32969	1.10557	6.45267e-09		Spata13	3.70638	0.601988	0.00353524		Slc17a5	2.81917	1.091	0.0781312		Lgals9	5.68575	1.18207	3.773e-07
Lypd8	1.05485	3.41127	0.480474		Colec11	0.562397	1.37413	0.749493		Serpinh1	0.633305	1.82244	0.740817		Mdm4	3.14007	0.397901	0.0272586		Ssbp1	-4.13425	-0.629841	0.000614213		S100a6	3.69057	0.879281	0.00375018		Chic2	6.32704	0.711129	6.46803e-09		Lrrfip2	3.70401	0.842529	0.0035688		St8sia4	2.81794	0.354307	0.0781312		H2-K1	5.68479	0.356302	3.49219e-07
Spred1	1.05229	0.291717	0.481923		Map4k3	0.562152	0.219247	0.749493		Gm26558	0.633305	1.82244	0.740817		Srp19	3.13989	0.337478	0.0272586		Oat	-4.1335	-0.863552	0.00061624		Sars	-3.68783	-0.508005	0.00377646		Stag2	6.32639	0.868608	6.57261e-09		Glmp	3.70023	0.517735	0.00361085		Tram1	2.81635	0.374546	0.0784512		Phf11c	5.68007	1.59079	3.97408e-07
Atrnl1	1.0483	0.826306	0.48445		Slc12a8	0.561503	0.276521	0.749493		Arpp21	0.633305	1.82244	0.740817		R3hdm4	3.1395	0.363671	0.0272964		Ppdpf	-4.13282	-0.506679	0.000617271		Alkbh1	-3.68727	-0.670227	0.00378189		Cdc73	6.32627	1.12361	6.5749e-09		Emp3	-3.69868	-0.393173	0.00361847		Ncbp2	-2.81439	-0.714797	0.0789232		Flii	5.67667	1.17784	3.85279e-07
Fam222a	1.0483	0.826306	0.48445		Rab26os	0.560166	0.268199	0.749493		Gm13686	0.633305	1.82244	0.740817		Fam111a	3.13797	0.525686	0.0273941		Hmgn1	-4.13082	-0.630496	0.000622312		Frmd8	-3.68645	-0.511854	0.00379135		Gm12216	6.3259	0.954626	6.49743e-09		Ecel1	3.69801	2.89963	0.00374965		Kti12	-2.81419	-0.706724	0.0789232		Anapc16	5.67432	0.940653	3.93446e-07
4930579G24Rik	1.04738	0.42295	0.484991		Zc3hav1l	0.557233	0.448133	0.749493		RP23-89C10.2	0.633305	1.82244	0.740817		Ecm1	3.13365	0.559198	0.0277883		Pdia3	-4.13056	-0.376174	0.000623899		Eno3	-3.68637	-2.32484	0.0038974		Cd5	6.32569	0.66903	6.42561e-09		mt-Co2	3.69631	0.194844	0.00365014		Dubr	2.81412	1.13817	0.0791179		Snrpb2	5.67389	1.09188	3.91636e-07
Cpne9	1.0422	2.08934	0.488527		Rab20	0.555516	0.127972	0.749493		Xylb	0.633305	1.82244	0.740817		Sumo2	3.13323	0.200042	0.0277883		Dennd5a	-4.1302	-1.1761	0.00062729		Hnrnpab	-3.6806	-0.491918	0.00389395		Mettl23	6.32234	0.572585	6.49743e-09		Atp5b	3.69537	0.330415	0.00366061		Dlgap4	2.81172	0.461468	0.0792744		Adk	5.67325	1.62598	4.34657e-07
Tbc1d15	1.04111	0.116452	0.489105		Cd63	0.555072	0.558557	0.749627		4930471M09Rik	0.633305	1.82244	0.740817		Ddx6	3.13189	0.296547	0.0278881		Tagln2	-4.12951	-0.641127	0.000632854		N4bp1	-3.67986	-0.799199	0.00389395		Hnrnpr	6.32034	0.6966	6.55295e-09		Vsig10	3.69228	1.30218	0.0037275		Psmb2	2.81082	0.305358	0.079388		B3gat3	5.67163	1.23515	4.08132e-07
Nln	1.03997	0.373794	0.489853		Fam222a	0.555072	0.558557	0.749627		Olfr183	0.633305	1.82244	0.740817		St3gal4	3.13145	0.76729	0.0279233		Brk1	-4.12801	-0.410561	0.000624394		Reep3	-3.67803	-0.773156	0.00390785		Efr3a	6.31995	0.839275	6.72674e-09		Rpp25l	3.69219	0.606868	0.00370572		Tbl1xr1	2.81048	0.519385	0.079388		Rab14	5.67149	0.702546	3.80646e-07
2810001G20Rik	1.03993	0.189628	0.489853		Frs3	0.555072	0.558557	0.749627		Cadm1	0.633305	1.82244	0.740817		Setd7	3.1309	0.565134	0.0279503		Rassf2	-4.12725	-0.686745	0.000629006		Ppil4	-3.67779	-0.600367	0.00390141		Bin2	6.31857	0.651498	6.65014e-09		Abi1	3.69108	0.539368	0.00371875		AI467606	2.81032	0.33634	0.079388		Sumo2	5.67146	0.516415	3.74025e-07
Car1	1.03879	2.31173	0.489975		Tmem177	0.553676	0.169774	0.750586		Gm11683	0.633305	1.82244	0.740817		Accs	3.13012	0.836654	0.027998		Mrps33	-4.12666	-0.529784	0.000628385		Nop58	-3.67551	-0.70653	0.00396708		Ralbp1	6.316	0.679795	6.70095e-09		Azin1	3.68892	0.725908	0.00374965		Cisd1	2.80953	0.583023	0.079491		Aldoa	5.66969	0.707489	3.81473e-07
2010005H15Rik	1.03692	0.614802	0.490953		Adcy9	0.553653	0.503415	0.750586		Gm15774	0.633305	1.82244	0.740817		Tmem242	3.12805	0.753148	0.0281525		Tbc1d15	-4.12039	-0.956639	0.000647351		Tmem160	-3.67431	-0.496272	0.00394851		Eif1b	6.3143	0.73428	6.95642e-09		Rrp15	3.68821	0.8557	0.00375482		Xbp1	2.80527	0.521589	0.0805074		Ict1	5.667	0.935194	4.00956e-07
Cpeb2	1.03683	0.274208	0.490973		Cr2	0.553653	0.503415	0.750586		RP23-331A21.6	0.633305	1.82244	0.740817		Zfand6	3.12474	0.304939	0.0284248		Prpf40a	-4.11681	-0.536978	0.000655599		Psmd11	-3.67374	-0.498579	0.00395615		Slc45a4	6.31055	1.39955	7.39771e-09		Dapp1	3.68754	0.573336	0.00375482		Eif2s1	-2.80474	-0.445805	0.0806629		Nap1l4	5.65969	0.808923	4.05329e-07
Hivep1	1.03646	0.204045	0.4912		Slc17a8	0.551902	1.28102	0.751546		Gm26561	0.633305	1.82244	0.740817		Epc2	3.12464	0.55317	0.0284248		Podnl1	4.1148	1.02872	0.000658295		Skap1	-3.67263	-0.273433	0.00396761		Leng8	6.31015	0.812502	7.10858e-09		Fas	3.68723	0.726064	0.00376545		Inpp5k	2.8041	0.479695	0.0806629		Sgk1	5.65778	2.99105	5.28352e-07
Tsnax	1.03581	0.0872097	0.491551		Dnah7a	0.551874	0.209662	0.751546		Trgv2	0.633305	1.82244	0.740817		Usp9x	3.12464	0.480473	0.0284332		Cxcr4	4.11408	0.725947	0.000660832		Tmem234	-3.67128	-0.379629	0.00397724		Unc50	6.31009	0.837762	7.00643e-09		Med28	3.68557	0.399278	0.00377206		Slc25a33	-2.8036	-1.57563	0.0809281		Arpc1a	5.65642	1.03322	4.34772e-07
Ttl	1.03554	0.45191	0.491709		Pcx	0.550212	0.459021	0.752876		Gm12689	0.633305	1.82244	0.740817		Dguok	3.12351	0.33057	0.0284574		Dnttip2	-4.11342	-0.638734	0.000662567		Ifih1	-3.6694	-1.43938	0.00403994		Nsmaf	6.30642	1.18486	7.20745e-09		Grhl1	3.68229	1.98025	0.00387415		Atp5b	-2.80324	-0.254631	0.0809281		Pfdn5	5.65212	0.451221	4.19213e-07
Gpr180	1.03296	0.195427	0.493486		BC025920	0.545841	0.17981	0.756055		Gm14341	0.633305	1.82244	0.740817		Mecp2	3.12316	0.399543	0.0284749		Rab11fip2	-4.11326	-0.794462	0.000666345		Mrto4	-3.66883	-0.895236	0.00403994		Map3k1	6.30617	0.962635	7.33488e-09		Kpna2	3.68099	1.3788	0.00386187		Tmem234	2.80282	0.281578	0.0808195		Lbh	5.64804	0.680316	4.26819e-07
3300002I08Rik	1.03289	0.603913	0.493486		Lipa	0.545252	0.0784315	0.756414		Zfp750	0.633305	1.82244	0.740817		Fam168b	3.12276	0.432179	0.0284749		Gsta4	-4.1127	-3.08299	0.000698526		Canx	-3.6678	-0.565389	0.00403436		Aamp	6.303	0.757259	7.38473e-09		2810428I15Rik	3.68049	0.469123	0.00384194		Snrpg	-2.80209	-0.239634	0.0809281		Unc119b	5.64794	1.59925	4.87533e-07
Fam65c	1.03289	0.603913	0.493486		Paqr3	0.544187	0.352106	0.757021		Card10	0.633305	1.82244	0.740817		AI480526	3.12272	0.559307	0.0284749		Snrpa1	-4.11109	-0.703229	0.000670815		Thumpd3	-3.66776	-0.692587	0.0040298		Ppp1r11	6.29698	0.670279	7.49089e-09		Ddx10	3.67983	0.660383	0.00385946		Gtf2i	-2.80147	-0.521013	0.0809281		Cat	5.64751	1.43414	4.59019e-07
Fgfrl1	1.02895	1.0487	0.496126		Ccl22	0.543654	1.69606	0.757212		Sbspon	0.633305	1.82244	0.740817		Syp	3.12077	1.02602	0.0286733		Kras	-4.11023	-0.659846	0.000669078		1700123O20Rik	-3.66727	-0.626163	0.00403436		Yme1l1	6.29599	0.839926	7.75278e-09		Itgb2	3.67755	0.392867	0.00387415		Nudc	-2.80054	-0.359501	0.0811416		Mknk2	5.64402	0.904841	4.56085e-07
Spx	1.02622	1.82631	0.497864		Zbtb8b	0.543654	1.69606	0.757212		Ccdc155	0.633305	1.82244	0.740817		Lcp2	3.11797	0.303077	0.0288581		Tnfaip8l2	-4.10494	-0.48083	0.000682252		Mospd3	-3.66639	-0.937813	0.00403994		Casp8	6.29561	0.700757	7.5649e-09		Tram1	3.67705	0.475553	0.00387774		Vcp	2.80019	0.296963	0.0811077		Snf8	5.63966	0.899389	4.65746e-07
Hlcs	1.02363	0.231462	0.499741		C730034F03Rik	0.541145	0.123546	0.75889		Cngb1	0.633305	1.82244	0.740817		Npc1	3.11752	0.683565	0.028907		Ccr2	-4.10238	-3.59023	0.000729863		Psmc2	-3.66638	-0.451498	0.00403831		Lilrb4a	6.29512	1.86025	8.06518e-09		Cstb	3.67627	0.600749	0.00388636		Cct4	-2.79463	-0.28753	0.0824794		Cry1	5.63434	1.92603	5.28375e-07
Gm29562	1.02261	0.933221	0.500285		Tgfbr3	0.540909	0.253838	0.758978		Trbv21	0.633305	1.82244	0.740817		Ubr3	3.11541	0.686231	0.0290541		Fcf1	-4.10086	-0.722064	0.000697316		Hnrnpm	-3.66578	-0.387353	0.00403994		Brd8	6.28719	0.826243	7.99686e-09		Acap1	3.67585	0.4382	0.00388636		mt-Co2	-2.79284	-0.14805	0.0828108		Ndufb2	5.63242	0.915659	4.68176e-07
C330013J21Rik	1.01984	1.14823	0.501722		Arhgap27os2	0.540796	0.403279	0.75902		Smco1	0.633305	1.82244	0.740817		Tpcn1	3.11508	0.494279	0.0290541		Tax1bp1	-4.09964	-0.440124	0.000697316		Gtf3a	-3.66451	-0.5965	0.00405382		Eif5	6.28502	0.558029	7.97793e-09		Alyref	3.67474	0.507121	0.00389735		Nbn	-2.79148	-1.68804	0.0833809		Becn1	5.63167	1.07521	4.76793e-07
Ccdc39	1.01984	1.14823	0.501722		Shb	0.540427	0.374132	0.759141		AA986860	0.633305	1.82244	0.740817		Tmem57	3.11438	0.805729	0.0290906		Mif	-4.0973	-0.716097	0.000723767		Xpr1	-3.66288	-0.763784	0.00407525		Glg1	6.28489	0.959063	8.23658e-09		St8sia1	-3.67418	-1.69871	0.00395169		Tespa1	-2.79002	-0.551584	0.0833549		Wipf1	5.6247	0.854114	4.92363e-07
Gm26649	1.01984	1.14823	0.501722		Gpatch3	0.53863	0.184414	0.760396		Gm16602	0.633305	1.82244	0.740817		Larp1	3.11436	0.388551	0.0290857		Nrd1	-4.09695	-0.627162	0.000705836		M6pr	-3.66149	-0.585575	0.00410407		Spata13	6.28128	0.942521	8.3167e-09		Skil	3.67209	0.605176	0.00394671		Csnk1a1	2.78918	0.290691	0.0834027		Lockd	5.62362	1.87341	5.73824e-07
Gm15915	1.01984	1.14823	0.501722		Lrrc3b	0.535718	0.608598	0.762379		K230010J24Rik	0.633305	1.82244	0.740817		Mpp1	3.11376	0.407639	0.0290906		Exosc8	-4.0931	-0.491332	0.000715596		Nsun2	-3.66058	-0.764976	0.00411784		Dnajc5	6.28044	0.889846	8.38868e-09		Fbxw11	3.67105	0.958362	0.00396265		Lppos	2.78901	0.847003	0.0834149		Rsrp1	5.61785	0.526899	4.95658e-07
Gm5786	1.01984	1.14823	0.501722		Padi4	0.535718	0.608598	0.762379		Kcnq4	0.633305	1.82244	0.740817		Ctage5	3.11312	0.349085	0.0291265		Ewsr1	-4.0925	-0.476801	0.000717064		1110004F10Rik	-3.6594	-0.448131	0.00411279		Rbm3	6.27942	0.576909	8.15757e-09		Mapk6	3.66988	1.05235	0.00397148		Pik3ip1	-2.78879	-0.504689	0.0834149		Lamtor2	5.61326	0.698279	5.24994e-07
1700034H15Rik	1.01984	1.14823	0.501722		Gm17638	0.535718	0.608598	0.762379		2010300C02Rik	0.632768	0.542329	0.741147		Socs4	3.11295	0.574278	0.0291323		Ndufab1	-4.09043	-0.514914	0.00072484		Tial1	-3.65878	-0.603023	0.00411784		Ndufa2	6.27909	0.502335	8.20995e-09		Rangap1	3.66494	0.63619	0.00403189		Plagl1	-2.78829	-2.93875	0.0847886		Dck	5.61324	1.53213	5.61721e-07
1700016D06Rik	1.01984	1.14823	0.501722		Kcnd1	0.535718	0.608598	0.762379		Gm7467	0.631972	0.734975	0.741429		Purb	3.11083	0.268143	0.0292997		Gm2a	-4.08862	-0.697215	0.000728912		Nisch	-3.65819	-0.459766	0.00411784		Crim1	6.27814	1.30512	8.70897e-09		Itga6	-3.66067	-0.567834	0.00409676		Dnase2a	2.78538	0.611702	0.0842192		Abcf1	5.61267	0.943672	5.31277e-07
Hsp90ab1	1.01535	0.0453453	0.503308		Tmem45a	0.535718	0.608598	0.762379		Casc1	0.631972	0.734975	0.741429		Kdelr1	3.10811	0.35881	0.029543		Ncoa7	-4.08681	-0.887066	0.000736936		Ift22	-3.65588	-24.8143	0.00434192		Arrdc4	6.27798	1.40569	8.76871e-09		Polr2m	3.66013	0.432697	0.00409676		Serhl	2.7817	0.807814	0.0850591		Acsbg1	5.61211	1.47931	5.71263e-07
2810405F17Rik	1.01314	0.278818	0.503308		Ifi27	0.535105	0.0408697	0.7628		Gm43604	0.631972	0.734975	0.741429		Fbxl20	3.10722	0.568587	0.0296296		Pfdn2	-4.08627	-0.460517	0.000732373		Tcof1	-3.6548	-0.620856	0.00417235		Cebpz	6.26937	0.863012	8.9143e-09		Cebpz	3.65884	0.534958	0.0041119		2020-09-01	2.78069	0.238315	0.0850827		Aprt	5.61122	0.845883	5.28305e-07
Csrnp2	1.01168	0.457072	0.503308		9130019O22Rik	0.534816	0.348137	0.762997		Gm26826	0.631972	0.734975	0.741429		Mettl23	3.10548	0.244602	0.0297411		Pak1ip1	-4.08611	-0.643895	0.000731856		Ctnnb1	-3.65051	-0.51222	0.00423895		Wdr1	6.26872	0.681801	8.76871e-09		Ctss	3.65882	0.351901	0.0041119		Ifi203	-2.78045	-0.289043	0.0851999		Ybx1	5.60811	0.709678	5.25565e-07
Slpi	1.01125	1.08934	0.503308		Btbd16	0.533934	0.255488	0.76372		Comp	0.631972	0.734975	0.741429		Rcbtb1	3.10361	0.652911	0.0299242		Celf1	-4.08538	-0.572408	0.000732682		Ccnh	-3.64651	-0.754278	0.00430813		Tbcb	6.26641	0.822286	8.92989e-09		Srsf10	3.6588	0.437968	0.00410939		Cd40lg	-2.77941	-1.3779	0.0856974		Pin4	5.60614	0.857152	5.31058e-07
Ttc25	1.01094	1.34088	0.503308		Enah	0.53288	0.324091	0.764353		Mpp7	0.631371	0.237475	0.741781		Taf1d	3.10136	0.424769	0.0301132		Nucks1	-4.08347	-0.515378	0.000739765		Uqcc2	-3.64619	-0.582778	0.00431869		Ccnt1	6.26326	0.956138	9.55068e-09		Lima1	3.65749	2.01587	0.00420614		Prpf19	-2.77886	-0.648455	0.085564		Zfand2b	5.60598	1.37269	5.58471e-07
Tmem63b	1.00871	0.20883	0.503308		2410022M11Rik	0.528839	0.136441	0.766552		Slc26a11	0.628994	0.319937	0.743771		Park7	3.10047	0.214029	0.0301625		Hypk	-4.08312	-0.54484	0.000739765		Khdrbs1	-3.64617	-0.42553	0.00430813		Tnk2	6.2622	1.30704	9.57039e-09		Tmbim4	3.65484	0.454917	0.00416324		Clip3	2.77786	1.44239	0.0858948		Snrpd3	5.60501	0.772195	5.24994e-07
2810408A11Rik	1.0069	0.700775	0.503308		Slc43a1	0.527958	0.271562	0.766552		Bend6	0.628869	0.346704	0.74382		Zzef1	3.09986	0.537741	0.0301959		Erp29	-4.08248	-0.579577	0.000739289		Eif1b	-3.64426	-0.45031	0.00432819		Prpf8	6.26058	0.908647	9.44044e-09		Wdr18	3.65331	0.784743	0.00418352		1110032F04Rik	-2.77655	-1.51277	0.0862303		Ap1g2	5.60242	1.41808	5.7855e-07
Amh	1.00688	0.755917	0.503308		Acvr2a	0.527419	0.231392	0.766552		Socs5	0.628695	0.187487	0.743915		Dhx36	3.09974	0.337853	0.0301959		Ecm1	-4.07929	-0.950812	0.000754181		Nip7	-3.6442	-0.701793	0.00434778		Ndufb3	6.26001	0.597958	9.12513e-09		Prmt1	3.65278	0.498337	0.00418352		Tsr1	-2.77615	-1.15271	0.0862303		Naa20	5.60224	1.08723	5.71263e-07
Impdh2	1.00487	0.0910606	0.503308		Rgag4	0.526692	0.526135	0.766668		Olfr920	0.62669	1.08547	0.745367		Pafah1b1	3.09902	0.277092	0.0302197		Ubb	-4.07925	-0.220627	0.000748988		Etf1	-3.64375	-0.702921	0.00434524		Taldo1	6.25764	0.609096	9.44044e-09		Fbl	3.65094	0.47602	0.00421003		Il18rap	2.77249	1.34003	0.0870811		Bad	5.60093	1.42746	5.94209e-07
Pou6f1	1.00465	0.24708	0.503308		Zfp28	0.526678	0.226575	0.766668		Vangl2	0.625836	0.328898	0.745896		Lsm5	3.097	0.309224	0.0303905		Elp5	-4.07809	-1.34143	0.000757153		Polr2e	-3.64118	-0.440907	0.00436587		Bnip2	6.25678	0.928624	9.60453e-09		Bcl6	3.64831	1.21975	0.00427734		Atxn2	-2.77033	-0.809244	0.0874155		Ubald1	5.5988	1.3146	5.7785e-07
Zc3hav1l	1.00444	0.633661	0.503308		Gm27019	0.526602	0.696061	0.766668		Cetn4	0.625311	0.500509	0.74624		Gon4l	3.09539	0.415355	0.030542		Fam117a	-4.07788	-0.865056	0.000754258		Psmb3	-3.63951	-0.321193	0.00439626		Ywhaq	6.25649	0.635092	9.45374e-09		Slc39a4	3.64453	1.416	0.00432831		Nasp	-2.76765	-0.618252	0.088065		Fam173a	5.59783	0.784067	5.67419e-07
Gm9958	1.00253	0.556217	0.503308		Gm5533	0.525356	0.410658	0.767362		Gm26890	0.624793	0.168433	0.746531		Ubb	3.0936	0.156055	0.0306953		Uqcrc1	-4.07714	-0.536489	0.000754726		Rnf149	-3.63729	-0.706859	0.00442424		Nono	6.25321	0.619267	9.55406e-09		Mettl6	3.64434	0.892814	0.00431947		Ccdc86	-2.76429	-0.996694	0.0889873		Cd6	5.58845	0.831106	5.92498e-07
Ghr	1	19.304	0.503308		Gm8444	0.524362	0.888706	0.767362		1810006J02Rik	0.622934	0.346704	0.747982		Clip1	3.09253	0.460684	0.0307798		Cebpb	4.07279	0.613475	0.000762738		Sfpq	-3.6371	-0.377166	0.00442424		Ddx3x	6.25156	0.97026	9.8801e-09		Sdhb	3.64386	0.416251	0.00431947		Ripk3	2.76195	0.746922	0.089182		Srp54b	5.58431	0.905505	5.91674e-07
Gm26838	1	19.304	0.503308		Pvrl2	0.524362	0.888706	0.767362		Gm28557	0.622698	0.346704	0.748072		Luc7l3	3.09182	0.305566	0.0308168		Traf1	-4.07237	-0.522492	0.000764696		Trim34a	-3.63688	-0.905892	0.00442951		Krtcap2	6.25058	0.547277	9.70852e-09		Zfp593	3.64367	0.772562	0.00431947		Azin1	2.76127	0.576491	0.0893082		Dera	5.58367	1.31744	6.51636e-07
Pramef12	1	19.304	0.503308		S100b	0.524362	0.888706	0.767362		Armcx1	0.622447	0.393594	0.748235		Il1r2	-3.09056	-2.32361	0.0311853		Klf7	-4.07044	-1.25021	0.000775591		Lyar	-3.6354	-0.890019	0.00445418		Dennd5a	6.24936	1.25803	1.00383e-08		Spcs3	3.64346	0.674586	0.00432208		Mgst2	2.76083	0.361362	0.0893082		Ccser2	5.57988	1.28204	6.19743e-07
Gm15579	1	19.304	0.503308		Gm16838	0.524362	0.888706	0.767362		Slx1b	0.621682	0.164012	0.748745		Csk	3.09054	0.253815	0.0309154		Slc7a10	4.07003	1.7686	0.00078183		Hibadh	-3.63525	-0.694836	0.00443791		Mthfs	6.24184	0.970221	1.03785e-08		Irf8	3.64291	1.53288	0.00438314		Ppp2cb	2.75888	0.430858	0.0897407		Plgrkt	5.57857	0.82182	6.29112e-07
Gm43064	1	19.304	0.503308		Gm2449	0.524362	0.888706	0.767362		Eif4enif1	0.619844	0.0999711	0.750113		Ubr2	3.08776	0.480563	0.0311953		Phf3	-4.06884	-0.45339	0.000775819		Cirbp	-3.63517	-0.501968	0.00443791		Sbno1	6.24163	0.700762	1.02359e-08		Zfp652	-3.63908	-1.04558	0.0043982		Rin2	2.7576	1.57352	0.090349		Rala	5.57399	1.18538	6.81041e-07
Olig3	1	19.304	0.503308		Rorb	0.524362	0.888706	0.767362		Lypd1	0.619648	0.896438	0.750265		U2surp	3.08541	0.34548	0.0313712		Trim30a	-4.06554	-0.60404	0.000790791		Rnaseh2a	-3.63318	-0.893766	0.00447193		Polr2j	6.23898	0.660943	1.02667e-08		U2af1	3.63904	0.446832	0.00437879		Gm20696	-2.75706	-1.07016	0.090349		Commd6	5.56661	1.04085	6.79767e-07
Sprr2a3	1	19.304	0.503308		Pram1	0.524362	0.888706	0.767362		Gm14168	0.618422	0.734975	0.751102		Nfix	3.08525	0.799484	0.0313993		Capn2	-4.06491	-0.886178	0.00079092		Herc6	-3.63162	-0.862676	0.00450824		Rab1a	6.23858	1.0597	1.09043e-08		Tmed2	3.63723	0.334502	0.00439833		Fermt3	2.75657	0.318173	0.0902726		Psmd2	5.5643	0.926429	6.60437e-07
Cfap52	1	19.304	0.503308		Ctsk	0.524362	0.888706	0.767362		Pld2	0.616769	0.324938	0.752363		Gimap9	3.08204	0.249782	0.0316564		Ctsb	4.06488	0.504726	0.000785942		Ikzf2	-3.63146	-0.331246	0.00450346		Pik3c2a	6.23813	1.00903	1.06673e-08		Pcbp1	3.63673	0.401271	0.00440114		Ruvbl2	-2.75455	-0.830348	0.0908575		Fyn	5.56274	0.709989	6.54276e-07
Gm11695	1	19.304	0.503308		Dmrta2	0.524362	0.888706	0.767362		Nrbp2	0.616019	0.363006	0.752539		Nol7	3.08031	0.244521	0.0318023		Bank1	-4.06283	-4.52659	0.000833701		Fam160a1	-3.6305	-2.20027	0.00457204		Unc119	6.23361	1.02226	1.07947e-08		Psmd7	3.63508	0.52383	0.00442841		Jak1	-2.75423	-0.25837	0.0906798		Chic2	5.55957	0.761053	6.71782e-07
Mettl21b	1	19.304	0.503308		Efna2	0.524362	0.888706	0.767362		Lat2	0.615615	0.423888	0.752539		Wasf2	3.07995	0.368419	0.0318259		Ncf4	-4.06201	-0.602863	0.000798134		Gm19705	-3.63034	-2.64676	0.00457456		Cnot1	6.23272	0.915007	1.09229e-08		Gtpbp4	3.62909	0.535543	0.00452155		Klf3	-2.75289	-0.414464	0.0909532		Lsm10	5.55916	1.30432	7.25381e-07
Gm7535	1	19.304	0.503308		S100a2	0.524362	0.888706	0.767362		Gm37494	0.615151	0.136644	0.752539		Zfr	3.07956	0.412361	0.0318306		1110004F10Rik	-4.06075	-0.485626	0.000798134		Brd8	-3.62922	-0.547088	0.00452595		Uba2	6.23045	0.799991	1.10399e-08		Unc13d	3.62861	0.620355	0.00453624		Pcyt1b	2.74837	2.24993	0.0929613		Mocs2	5.55341	1.45872	7.6343e-07
Tas2r137	1	19.304	0.503308		Gm33051	0.524362	0.888706	0.767362		Brca1	0.614136	0.443926	0.752539		Srpk2	3.07759	0.373721	0.0320194		Smyd2	-4.05855	-2.06622	0.000825841		Stx16	-3.62837	-0.506152	0.00452752		Ly9	6.22487	0.89926	1.14892e-08		Blvra	3.62763	0.640342	0.00454196		Sf3b3	-2.74772	-0.610984	0.092375		Limd1	5.54985	1.05117	7.28427e-07
Aoc3	1	19.304	0.503308		Gm42878	0.524362	0.888706	0.767362		Arrdc4	0.612489	0.114901	0.753762		Mfhas1	3.07757	0.654839	0.0320194		Parp14	-4.05818	-0.560519	0.000810041		Gpatch8	-3.62824	-0.552766	0.00452752		Rnf7	6.21877	0.709918	1.18695e-08		Rcl1	3.62745	0.884468	0.00454196		Lrpap1	2.74624	0.564716	0.0926356		Mvd	5.54876	2.02968	8.50498e-07
Kcnj10	1	19.304	0.503308		Cenpi	0.524362	0.888706	0.767362		Insr	0.611883	0.167427	0.754191		1110032F04Rik	3.07724	0.937497	0.0320225		Gimap3	-4.05793	-0.262757	0.000807988		Eif5	-3.62815	-0.338632	0.00452756		Zmiz2	6.21597	0.929506	1.23865e-08		Eif1a	3.62554	0.685671	0.00457024		Myeov2	2.74116	0.301561	0.0937806		Yy1	5.54255	0.765884	7.33175e-07
2900079G21Rik	1	19.304	0.503308		Tldc1	0.52362	0.608598	0.767834		Pcyt1b	0.611732	0.371776	0.754265		Vapb	3.0768	0.475597	0.0320225		Mplkip	-4.05757	-0.749065	0.000807988		Chst2	-3.62783	-1.10244	0.00455137		Ttn	6.20731	1.46964	1.29391e-08		Ddx27	3.62531	0.603394	0.00457024		Rbm3	2.74054	0.254709	0.0939463		Bsg	5.54203	0.703684	7.26541e-07
Cnr1	1	19.304	0.503308		Fam117a	0.522415	0.0681076	0.76872		Ica1l	0.610784	0.612984	0.754957		Fxr1	3.0761	0.365898	0.0320585		Ccdc124	-4.0562	-0.72925	0.00081551		Trim28	-3.62736	-0.700657	0.00453851		Tor1aip1	6.20506	0.857723	1.26831e-08		Mrpl13	3.62271	0.551348	0.00461378		Cdc42se2	2.73937	0.261126	0.094113		Gpr68	5.53973	1.35003	7.96043e-07
Mcpt1	1	19.304	0.503308		Gm27209	0.521815	0.696061	0.768953		Gm15706	0.61046	0.30218	0.754982		2610507B11Rik	3.07479	0.53391	0.0321652		1700097N02Rik	-4.05364	-2.33529	0.000842607		Saysd1	-3.62678	-0.73391	0.0045486		Nudcd3	6.20277	0.821407	1.30115e-08		Arhgap39	3.62188	0.906816	0.00462815		Ppa1	-2.73717	-0.628547	0.0949839		Igbp1	5.53806	0.993712	8.03842e-07
Gm29427	1	19.304	0.503308		S100a7a	0.521815	0.696061	0.768953		Gpam	0.609959	0.620804	0.755252		Bmyc	3.07194	0.389616	0.0324259		Kctd2	-4.05269	-0.948216	0.00082426		Acin1	-3.62422	-0.403732	0.00457204		Lclat1	6.20148	1.25655	1.35354e-08		Ptpn13	3.62089	0.773025	0.00463207		Pik3c2a	2.73632	0.492388	0.0949229		Mff	5.52645	0.891501	8.03842e-07
Eno4	1	19.304	0.503308		Abhd12b	0.521815	0.696061	0.768953		Zglp1	0.609959	0.620804	0.755252		Rbm17	3.07173	0.397005	0.0324259		Gpatch4	-4.05179	-1.1549	0.000833701		Mdm4	-3.624	-0.597896	0.00457204		Nlrc3	6.20118	1.10093	1.34299e-08		Fuz	3.62085	0.929377	0.00464682		Ctsc	2.73425	0.483872	0.0953826		Pqlc3	5.52451	1.48753	8.50498e-07
Slc7a11	1	19.304	0.503308		Fgfr1	0.521815	0.696061	0.768953		A930024E05Rik	0.606204	0.134135	0.757405		Hnrnpul1	3.06869	0.361643	0.0327281		BC094916	-4.05082	-1.17802	0.000836356		Tmem154	-3.62387	-0.669393	0.00458231		Ptger4	6.20028	1.02503	1.33607e-08		Mettl20	-3.61938	-1.00935	0.00465828		Grina	2.73099	0.516002	0.0961879		Idh3b	5.51509	0.899605	8.60392e-07
Pmis2	1	19.304	0.503308		Col4a4	0.521815	0.696061	0.768953		Fbxw10	0.602998	0.254753	0.759597		Ivd	3.06663	0.620687	0.0329348		Gm11713	-4.05011	-1.06903	0.000833701		Tmem50a	-3.62367	-0.311939	0.00457204		Zmynd8	6.19846	0.834461	1.34591e-08		Cldnd1	3.61936	0.62021	0.00465828		Efhd2	2.73057	0.433769	0.0961879		Lypla2	5.5116	0.96806	8.65014e-07
RP23-26A14.14	1	19.304	0.503308		Txnl4b	0.521259	0.257487	0.76926		Gm6225	0.602143	0.822438	0.759724		Pigp	3.06623	0.415662	0.0329357		Ppp4r2	-4.04887	-0.589676	0.000833102		Srrm1	-3.62267	-0.437727	0.00457929		Gpr107	6.19828	1.05351	1.35054e-08		Cul1	3.61631	0.613884	0.00470605		Amz2	2.73009	0.686686	0.0963273		Nfyb	5.51104	1.03467	8.81476e-07
Dnah2	1	19.304	0.503308		Ppm1m	0.520909	0.0569226	0.76951		Lrrc48	0.602143	0.822438	0.759724		Gm10020	3.06584	0.668077	0.0329602		Prkd3	-4.04475	-3.13133	0.000877664		Man1a2	-3.62217	-0.656669	0.00458231		Kbtbd11	6.19782	0.696201	1.3119e-08		Polr2e	3.61357	0.431196	0.0047482		Cdh13	2.72998	1.91778	0.0970103		Ppp6c	5.5099	1.0499	8.95013e-07
Rgs7bp	1	19.304	0.503308		Wdr53	0.518854	0.113802	0.771095		Gm26899	0.602143	0.822438	0.759724		Emg1	3.06567	0.241437	0.0329602		Ddx27	-4.04046	-0.745479	0.000866116		Ubac2	-3.62206	-0.547371	0.00458231		Ppp6r1	6.19719	0.879388	1.35684e-08		Cobll1	3.61307	1.86624	0.00482648		Stat5a	-2.72706	-0.687373	0.0970103		Desi1	5.50745	1.34995	9.1631e-07
Gm42797	1	19.304	0.503308		Cyp2r1	0.516294	0.473668	0.773131		Pygl	0.602143	0.822438	0.759724		Ggnbp2	3.06481	0.31759	0.0330176		Huwe1	-4.04041	-0.543001	0.00086058		Pla2g16	-3.62029	-0.388376	0.00461451		Atxn2l	6.19434	0.725765	1.37817e-08		Ahsa1	3.61228	0.406286	0.00476239		Tor1aip1	2.72669	0.431263	0.0970103		Hpcal1	5.50626	1.1035	9.05291e-07
Tekt5	1	19.304	0.503308		Grb7	0.515247	0.293962	0.773758		B3galt1	0.602143	0.822438	0.759724		Inpp4a	3.06368	0.540009	0.0331126		G430095P16Rik	-4.03985	-1.88392	0.000870367		Wipf1	-3.6192	-0.467323	0.00462946		Nsmce1	6.18976	0.769974	1.38013e-08		2700029M09Rik	3.60846	0.554647	0.00482347		Arpc5l	2.72647	0.295575	0.0970103		Sqstm1	5.50283	1.12575	9.29377e-07
Ugt2b1	1	19.304	0.503308		Gm17249	0.512079	0.326827	0.775518		Gm26660	0.602143	0.822438	0.759724		Pnrc2	3.06303	0.401363	0.0331459		Slc22a15	4.03843	0.957171	0.000866116		Scd2	-3.61906	-1.06216	0.00465912		Kdelr1	6.18856	0.790712	1.39617e-08		Tecpr1	-3.6071	-0.481659	0.00484075		Lrp10	2.72338	0.317369	0.0977453		Slc25a24	5.50086	2.20651	1.03276e-06
1700018B08Rik	1	19.304	0.503308		Zfp213	0.511493	0.132471	0.775518		Lacc1	0.599726	0.620804	0.761231		Nin	3.06255	0.485625	0.0331855		Lsm8	-4.0373	-0.617512	0.000866116		Ranbp1	-3.61831	-0.529061	0.0046793		Pigx	6.18615	0.752161	1.41862e-08		BC005624	3.60694	0.458706	0.00484075		Pck2	2.72283	0.737443	0.0979406		Stk38	5.4992	0.941701	9.56736e-07
Asb10	1	19.304	0.503308		Wdr5b	0.509997	0.266072	0.775518		Prnp	0.59862	0.136235	0.761923		Ubxn11	3.06146	1.00851	0.0333118		Tmod3	-4.03686	-0.752699	0.000871055		Ddx18	-3.61605	-0.524703	0.00467676		Slc43a2	6.18206	1.26494	1.5017e-08		Far1	3.60419	0.707941	0.00489192		Tmem176b	2.72187	1.7447	0.0987953		Swi5	5.49532	0.767326	9.59636e-07
Insm2	1	19.304	0.503308		Fpgt	0.509761	0.108646	0.775518		Arhgap24	0.595972	0.354288	0.763848		Rad50	3.06073	0.504374	0.0333118		Slc2a3	-4.03469	-0.916136	0.000878292		Tnip1	-3.61582	-0.549128	0.00467676		Sh3bgrl3	6.17902	0.484757	1.45615e-08		Plbd2	3.60266	0.897123	0.00492342		Slc2a8	2.72126	1.3304	0.0984755		Zdhhc2	5.49382	1.51889	9.9184e-07
Lrrc46	1	19.304	0.503308		Zfp449	0.508922	0.473668	0.775518		B130046B21Rik	0.595524	0.464885	0.764132		Slc38a6	3.05933	1.07087	0.0334021		Slfn5	-4.03426	-1.2956	0.00089622		St8sia4	-3.61454	-0.493611	0.00468477		Nr2c2	6.17871	0.952762	1.48687e-08		Pop4	3.60246	0.931338	0.00492598		Ugcg	-2.72076	-0.679185	0.0984755		Sms	5.4928	0.990221	9.66221e-07
Gm10636	1	19.304	0.503308		Fam212b	0.507785	0.230938	0.775518		Ikbip	0.594161	0.223399	0.765231		Hnrnpul2	3.05927	0.36083	0.0334021		Mrps14	-4.03016	-0.474406	0.000891288		Apopt1	-3.61117	-0.678578	0.00473562		Trim30a	6.17806	0.829565	1.48687e-08		Mfsd5	3.59982	0.896433	0.004965		Rnaseh2c	-2.71901	-0.336285	0.0987416		Rtfdc1	5.49214	0.955874	9.676e-07
Gm11541	1	19.304	0.503308		Ksr2	0.506232	0.165546	0.775518		Dennd4c	0.594121	0.150012	0.765231		Erp29	3.0591	0.326984	0.0334021		Abhd11	-4.02591	-1.27371	0.000915669		Leprotl1	-3.61111	-0.305461	0.00473562		Hnrnpul2	6.17792	0.800568	1.49299e-08		Elavl1	3.59935	0.423191	0.004965		Chd4	-2.7177	-0.364211	0.0989114		Ddt	5.4871	0.968154	9.97184e-07
Slc22a22	1	19.304	0.503308		Lrrc4	0.505938	0.696061	0.775518		Prrg2	0.593405	0.284017	0.76583		Mga	3.05849	0.449726	0.0334021		Manf	-4.02421	-0.502893	0.000911341		Sypl	-3.6094	-0.834495	0.00477909		Dennd1b	6.17768	1.0164	1.515e-08		Swap70	3.59666	1.0268	0.00502329		Cmc1	2.71759	0.417967	0.0989114		Gnpda1	5.48656	1.77236	1.09138e-06
Procr	1	19.304	0.503308		Snhg20	0.505921	0.062109	0.775518		Kantr	0.592933	0.237475	0.766135		Suz12	3.05818	0.447174	0.0334021		Stat5a	-4.01879	-0.975896	0.000936099		Kcmf1	-3.60939	-0.607889	0.00476231		Tnfaip8l2	6.1773	0.655532	1.48076e-08		Cox19	3.59544	0.72355	0.00502901		Txlnb	2.71742	2.04204	0.0993168		Tecpr1	5.4854	0.810372	9.87467e-07
Gpx3	1	19.304	0.503308		Cnksr3	0.503968	0.145863	0.775518		Gm16152	0.592694	0.12854	0.766289		Phc3	3.05809	0.353513	0.0334021		Mrps25	-4.01856	-0.827724	0.000933999		Tmem38b	-3.60491	-1.37644	0.00488156		Rprd2	6.17616	0.951909	1.51892e-08		Ppp4r2	3.59493	0.46238	0.00502901		Tmx4	2.71708	0.568172	0.0989114		Ogfr	5.48369	1.069	1.03302e-06
Gm20089	1	19.304	0.503308		Poln	0.503906	0.459021	0.775518		Vsig10l	0.591246	0.549419	0.76737		D930015E06Rik	3.05461	0.540597	0.0337859		Timm10b	-4.01727	-0.478659	0.000935715		Abtb2	-3.60427	-1.21113	0.00488156		Cdk6	6.1757	1.3573	1.62646e-08		Ppig	3.59148	0.403909	0.00508769		C330027C09Rik	2.71437	2.34125	0.100362		Ripk3	5.48068	1.83262	1.14506e-06
Gm42838	1	19.304	0.503308		Gm568	0.502953	0.249804	0.775518		Gm26810	0.58979	0.352952	0.768389		Plcl2	3.05319	0.67529	0.0339144		B4galt1	-4.01705	-0.855708	0.000936986		Pgam1	-3.60335	-0.596655	0.0048856		Ndufs4	6.17384	0.664069	1.50968e-08		Sf3b5	3.58956	0.372158	0.0051246		Fabp5	2.71256	1.0006	0.100524		Trip12	5.48047	0.9108	1.0204e-06
Ptprh	1	19.304	0.503308		Bmp2k	0.502642	0.0835645	0.775518		Msh3	0.589177	0.10277	0.768824		Nufip2	3.05271	0.31689	0.0339144		Trat1	-4.01455	-3.50761	0.000981944		Scfd1	-3.60261	-0.885498	0.00488156		Dhps	6.17302	0.882487	1.52806e-08		Arpc5l	3.58893	0.364223	0.00512689		Mapre3	2.71252	1.06048	0.100236		Cd27	5.47958	0.519303	1.00422e-06
Ccdc68	1	19.304	0.503308		Tceanc	0.502627	0.230938	0.775518		Slc16a10	0.588569	0.500509	0.769324		Smurf2	3.05162	0.704185	0.0340706		Gbp8	-4.01393	-0.723622	0.000948908		Caprin1	-3.60156	-0.534335	0.0048856		Spen	6.17264	0.97421	1.55492e-08		Hspa4l	3.58622	0.767646	0.00519169		Pde4b	2.70899	0.588195	0.100939		H2-M3	5.47896	0.883745	1.01651e-06
Vmn2r99	1	19.304	0.503308		Degs2	0.501792	0.345563	0.775518		Slc44a1	0.588333	0.2	0.769475		Ccdc30	3.04923	1.36295	0.0343189		Swi5	-4.01339	-0.43483	0.000949317		Rhog	-3.60064	-0.518257	0.00489553		Atox1	6.16815	0.666102	1.57022e-08		Mrpl12	3.58478	0.538525	0.00519676		Flywch2	2.70844	1.41665	0.101162		Polr3c	5.4786	1.35777	1.07695e-06
Gm26856	1	19.304	0.503308		Trav4-2	0.499887	0.888706	0.775518		Gm42469	0.587669	0.289005	0.770026		Gngt2	3.04907	0.519492	0.0342707		Stim2	-4.01189	-0.784562	0.000954756		Ubap2l	-3.60052	-0.477316	0.00488903		Prdx1	6.16399	0.587633	1.56146e-08		Dek	3.58406	0.414048	0.0052096		Sfpq	-2.70817	-0.299464	0.101157		Top2b	5.47671	0.823295	1.03302e-06
Rapgef3os2	1	19.304	0.503308		Ccdc122	0.49846	0.286669	0.775518		1700026D11Rik	0.587578	0.443926	0.770047		Tsc22d4	3.04816	0.251724	0.0343189		Ddx10	-4.01173	-0.824806	0.00095552		Cux1	-3.60042	-0.756552	0.00489991		Cblb	6.16295	1.05516	1.6606e-08		Penk	3.5833	2.7774	0.00536418		Mettl23	2.707	0.26634	0.10119		Nudcd2	5.47508	1.21369	1.05766e-06
Myo1b	1	19.304	0.503308		Zfp839	0.497712	0.269796	0.775518		Slco2a1	0.587464	0.437773	0.770084		Sp3	3.04623	0.346783	0.0344808		Rtf1	-4.00902	-0.496479	0.000959297		Hmgn2	-3.59641	-0.727943	0.0049951		Gatad2a	6.16092	1.02438	1.6606e-08		Srpr	3.58298	0.553642	0.0052225		Camk2d	2.70663	0.330383	0.101204		Glrx2	5.47492	1.10326	1.06766e-06
Sestd1	1	19.304	0.503308		Gm16845	0.494394	0.199634	0.775518		RP23-78N8.4	0.584759	0.822438	0.771217		Asnsd1	3.04603	0.462326	0.0344808		Sub1	-4.00651	-0.335879	0.00097365		Smyd2	-3.59621	-1.76615	0.00502324		Gapdh	6.16027	0.555733	1.58635e-08		Tsn	3.5786	0.392544	0.00531018		Ppm1h	2.70452	0.556996	0.101825		Hscb	5.47486	1.27129	1.0645e-06
Ccnb1ip1	1	19.304	0.503308		Gimap6	0.493495	0.0256885	0.775518		Efhc1	0.584688	1.01508	0.771217		Tmem123	3.04451	0.362644	0.0346165		Ppp2ca	-4.00617	-0.416504	0.0009727		Timm21	-3.58967	-1.01873	0.00509682		Chd2	6.15965	0.723632	1.64366e-08		Tmem128	3.57841	0.450995	0.00531185		Cfap36	2.70362	0.62391	0.101959		Rin3	5.46556	1.11976	1.09224e-06
Akr1b7	1	19.304	0.503308		Ckap2	0.491717	0.608598	0.775518		Gm16838	0.584688	1.01508	0.771217		Apool	3.04329	0.577459	0.0347343		Rnaseh2a	-4.00577	-0.981116	0.000976586		Tmem243	-3.5889	-0.55035	0.00509706		Exoc2	6.15911	1.20952	1.66727e-08		Atp6ap2	3.57838	0.616352	0.00532377		Jak3	2.70258	0.629866	0.102177		Gatad1	5.46293	1.17463	1.17395e-06
Myo5b	1	19.304	0.503308		Hs3st3b1	0.489037	0.269796	0.775518		L3hypdh	0.584688	1.01508	0.771217		4833420G17Rik	3.04226	0.517682	0.0347626		Nrros	-4.00445	-1.22486	0.00098656		Espn	-3.5866	-1.19756	0.00513523		Itgb8	6.15691	1.30177	1.67818e-08		Ppp2r1a	3.5766	0.529573	0.00533821		Mea1	2.69943	0.471007	0.103089		Ctage5	5.4616	0.91122	1.12446e-06
Gm13184	1	19.304	0.503308		5730422E09Rik	0.4884	0.494427	0.775518		Gm13288	0.584688	1.01508	0.771217		Adgre5	3.04197	0.317886	0.0347626		Akap8	-4.00151	-0.765908	0.00098656		Jak1	-3.58584	-0.297122	0.00513523		H2afz	6.15612	0.70007	1.63255e-08		Tox4	3.57546	0.532359	0.00535771		Arpc2	2.69878	0.194356	0.103168		Ube2a	5.46057	1.00723	1.12696e-06
Tsks	1	19.304	0.503308		Impg2	0.4884	0.494427	0.775518		Gm15234	0.584688	1.01508	0.771217		Cln3	3.04186	0.616809	0.0347626		Trp53	-4.0007	-0.481009	0.000989382		Polr2j	-3.5856	-0.43926	0.00513523		Psmd4	6.1537	0.612777	1.6921e-08		Gata1	-3.575	-1.76054	0.00540882		Clta	2.6968	0.215586	0.103633		Sap18	5.45775	0.835843	1.12176e-06
Retnlb	1	19.304	0.503308		Dok1	0.488061	0.0606326	0.775518		Gm26648	0.584688	1.01508	0.771217		Usp19	3.04131	0.434844	0.0347626		BC031181	-4.00066	-0.489375	0.000989382		Tceb1	-3.58469	-0.428696	0.00514596		Ubtf	6.15336	0.744651	1.68386e-08		Hccs	3.57376	1.01934	0.00540882		Nol6	-2.69384	-1.16803	0.104577		Plekha2	5.45285	1.20172	1.18188e-06
4930455D15Rik	1	19.304	0.503308		Angptl4	0.488023	0.243548	0.775518		Trbv24	0.584688	1.01508	0.771217		Fam32a	3.04126	0.295566	0.0347626		Pstpip1	-4.00021	-0.579935	0.000989382		Mpp6	-3.58421	-1.0685	0.00517896		Fam134a	6.15308	0.99422	1.72676e-08		Ninj1	3.57044	0.904812	0.00543856		St3gal1	2.69356	0.705737	0.104577		Ndufc2	5.45131	0.781829	1.16969e-06
Gm43714	1	19.304	0.503308		Ict1os	0.487927	0.526135	0.775518		Wfikkn1	0.584688	1.01508	0.771217		Thy1	3.04124	0.286039	0.0347626		Gnai2	-3.99353	-0.294095	0.00102348		Nckap1l	-3.58309	-0.696805	0.00517896		Rab7	6.15254	0.702048	1.69302e-08		Polr2c	3.57039	0.499397	0.00543717		Mapk12	-2.69343	-24.2931	0.10585		Akt1	5.44955	1.11287	1.21954e-06
Klhl30	1	19.304	0.503308		Mitf	0.487278	0.410658	0.775518		Tuba3a	0.584688	1.01508	0.771217		Rnmt	3.04089	0.53439	0.0347626		Snrpa	-3.99192	-0.846634	0.00102868		Golga4	-3.58303	-0.68593	0.00517896		Dctn3	6.15147	0.671225	1.68926e-08		Impa1	3.57032	0.516839	0.00543717		Tcof1	-2.69323	-0.464166	0.104577		Map2k2	5.44802	0.80962	1.19668e-06
Abca4	1	19.304	0.503308		RP23-4H17.3	0.487274	0.390252	0.775518		Gm26646	0.584688	1.01508	0.771217		Pitpnm1	3.04053	0.45744	0.0347626		Rbm8a	-3.99034	-0.431275	0.00103252		Tmem106b	-3.58223	-0.688357	0.005183		Zc3h7a	6.14871	0.917519	1.77182e-08		Zmat5	3.57005	0.515761	0.00543719		Csnk1g2	2.69283	0.345981	0.104577		Tax1bp1	5.44597	0.703631	1.1859e-06
Plch1	1	19.304	0.503308		Zfp335os	0.487025	0.374132	0.775518		Amhr2	0.584688	1.01508	0.771217		Dido1	3.04044	0.453485	0.0347626		Dusp2	-3.9883	-0.620823	0.00104083		Arhgap39	-3.58196	-1.26221	0.00520362		Tmpo	6.14822	0.854947	1.77182e-08		Ccdc28b	3.56823	1.11897	0.00547283		Trp53	-2.69195	-0.338972	0.104801		Snrpf	5.44532	0.617619	1.16969e-06
Gpc5	1	19.304	0.503308		Casp9	0.484761	0.166239	0.775518		Kndc1	0.584688	1.01508	0.771217		Asf1a	3.04043	0.508326	0.0347626		Mdfic	-3.98827	-0.668334	0.00103885		Actb	-3.58105	-0.222928	0.00520362		Pum1	6.14257	0.810752	1.7874e-08		Sdcbp	3.56821	0.466334	0.00545905		Frat2	-2.69174	-0.938596	0.104801		Atrx	5.44311	0.745068	1.2024e-06
Gm26936	1	19.304	0.503308		Tmem144	0.483997	1.1111	0.775518		Klhl10	0.584688	1.01508	0.771217		Rangrf	3.03981	0.484786	0.034797		Tcf25	-3.98744	-0.45179	0.00103768		Trim12c	-3.58086	-0.619982	0.00520362		Abcg1	6.14234	0.986573	1.80555e-08		Mrto4	3.56745	0.69639	0.00546567		Cst7	2.69135	0.440548	0.104801		3830406C13Rik	5.43954	1.25713	1.26761e-06
Slc26a1	1	19.304	0.503308		Gm26520	0.481382	0.170969	0.775518		Lrrc16b	0.584688	1.01508	0.771217		Emc1	3.03876	0.698934	0.0349024		Tamm41	-3.98691	-2.70383	0.00107314		Tox2	-3.58083	-1.35094	0.00522757		Sdcbp	6.14228	0.764652	1.77914e-08		Raver1	3.56692	0.598151	0.00547283		Tnfrsf4	2.69107	0.45871	0.104801		Ndufs6	5.43855	0.766546	1.23539e-06
Clstn3	1	19.304	0.503308		Prss27	0.480075	0.494427	0.775518		Pdf	0.584688	1.01508	0.771217		Birc3	3.03813	0.464775	0.0349032		Plekhg3	3.98587	2.86572	0.00107893		Lrpap1	-3.57907	-0.801234	0.00522757		Mrpl52	6.14195	0.527202	1.77038e-08		Clns1a	3.56593	0.528782	0.00548878		Ppie	-2.68996	-0.574863	0.105091		Ighm	5.43343	0.697241	1.26113e-06
Erich6	1	19.304	0.503308		Zfp945	0.47872	0.0654101	0.775518		Ctsf	0.584136	0.25684	0.771519		Phf2	3.03805	0.585443	0.0349032		Plekhj1	-3.98494	-0.443145	0.00104541		Alyref	-3.57837	-0.544802	0.00522757		Iigp1	6.14137	1.01265	1.8478e-08		Abcf1	3.5645	0.467006	0.00551108		Dtx4	-2.68593	-1.58801	0.106312		Ten1	5.43209	1.21008	1.32501e-06
[truncated: 14,977 more rows]
[truncated: 12 more columns]
